# Supplementary material for: Characterization of a Read-through Fusion Transcript, BCL2L2-PABPN1, Involved in Porcine Adipogenesis
Source: MDPI journal article supplement (doi:10.3390/genes13030445), 2022-02-28
Supplement: s1 [file s1]

Table S1-1 Primers used for cDNA cloning and verification of BCL2L2-PABPN1 formation

| Name/Gene                                           | Sequence (5'-3')                                        |
|-----------------------------------------------------|---------------------------------------------------------|
| <b>cDNA cloning</b>                                 |                                                         |
| B1                                                  | F: cttcaccaggtctctgatgaactc                             |
| P1                                                  | R: atattcatctgcttctactctggtc                            |
| P2                                                  | R: tctagcccgccctctgtagac                                |
| BP                                                  | R: tcgcttcagctcccagccccactg                             |
| P3                                                  | F: aacagaccaggcatcagcacaacagac                          |
| P3                                                  | R: cctcagactccaagcgttcccgta                             |
| P4                                                  | F: ttgactaatgaatcctcggcg                                |
| P4                                                  | R: aaaatccacctccacctcc                                  |
| B3                                                  | F: tgcagtggatggaactggaac                                |
| B3                                                  | R: ttctgtctctctgtccccc                                  |
| <b>Tissue expression and real-time PCR analysis</b> |                                                         |
| BCL2L2-                                             | F: ccaggtctctgatgaactc                                  |
| PABPN1                                              | R: ctgcttctactctggtc                                    |
| β-actin                                             | F: catcaccatcggaacga<br>R: gcgtagaggctcttctgatgt        |
| DNAJB1                                              | F: cccaaggaaggagaccaga<br>R: aaagcctcccgaaggtaat        |
| SERPINB2                                            | F: tcctgtcggactgtacctc<br>R: ctgggcagcacttgattt         |
| DNAJA4                                              | F: cccatctacaaagcacc<br>R: catgtcgtccgttatcct           |
| ANGPTL2                                             | F: gctgacgaaccaaggcaact<br>R: tggcatattcggcaagacc       |
| PHGDH                                               | F: gaacgacagcactttgcccttg<br>R: gctccagcgcatgacccgact   |
| ALDH1A1                                             | F: atttaggaggtgcataaga<br>R: aaagttccatccatcggtc        |
| NUPR1                                               | F: gctcctatgccagaagatg<br>R: ctccctcccaggtagaatg        |
| RGS4                                                | F: catgctggagcccacgataa<br>R: ttgaggaagcggcgatagg       |
| LUM                                                 | F: tcccatgatgatttcaagca<br>R: gtattccactatcagccagttc    |
| BAG3                                                | F: tcccaggtcaagtcaggtctatg<br>R: ttgctctgtctgtgccatctc  |
| TIMP3                                               | F: ccgtgtctatgatggcaagatg<br>R: caaggcaggtagtagcaggattt |
| <b>Stem-loop RT-PCR analysis</b>                    |                                                         |
| ssc-miR-1249                                        | RT: gtcgtatccagtgcagggtccgaggtattgcactggatacgactgaagaa  |

|                  |                                                                                            |
|------------------|--------------------------------------------------------------------------------------------|
|                  | F: acactccagctgggacgccttccccc                                                              |
| ssc-miR-196a     | RT: gtcgtatccagtcagggtccgaggtattcgactggatacgacccaacaa<br>F: acactccagctgggtaggtagtttcatgt  |
| ssc-miR-224      | RT: gtcgtatccagtcagggtccgaggtattcgactggatacgactaaacgg<br>F: acactccagctgggcaagtcactagtgtgt |
| ssc-miR-15a      | RT: gtcgtatccagtcagggtccgaggtattcgactggatacgacacaaacc<br>F: acactccagctgggtagcagcacataatg  |
| ssc-miR-32       | RT: gtcgtatccagtcagggtccgaggtattcgactggatacgacgcaactt<br>F: acactccagctgggtattgcacattact   |
| ssc-miR-10b      | RT: gtcgtatccagtcagggtccgaggtattcgactggatacgacacaaatt<br>F: acactccagctgggtaccctgtagaaccg  |
| universal primer | R: cagtgcagggtccgaggtat                                                                    |
| U6               | RT and R: aacgcttcacgaatttcggt<br>F: ctcgcttcggcagcaca                                     |

F: forward, R: reverse, RT: reverse transcription

Table S1-2 Identities of porcine BCL2L2-PABPN1 with orthologs from various species

| Species | GenBank No.  | Aa length | Identities with pig (%) |       |
|---------|--------------|-----------|-------------------------|-------|
|         |              |           | aa                      | cds   |
| Human   | NM_001199864 | 333       | 99.4                    | 95.41 |
| Alpaca  | XM_031678858 | 333       | 99.4                    | 96.41 |
| Vulpe   | XM_026007536 | 333       | 99.4                    | 95.61 |
| Whale   | XM_024133866 | 333       | 99.4                    | 96.61 |
| Bat     | XM_037129340 | 333       | 99.4                    | 94.71 |
