# Supplementary material for: Characterization of a Read-through Fusion Transcript, BCL2L2-PABPN1, Involved in Porcine Adipogenesis
Source: MDPI journal article supplement (doi:10.3390/genes13030445), 2022-02-28
Supplement: s1 [file s1]

Figure 2.C

Lane 1: DNA Ladders Marker

Lane 2-6: Confirmation of BP with RT-PCR

Figure 3.C

Lane 1: DNA Ladders Marker

Lane 2: cDNA (Identification of mechanisms underlying BP formation with RT-PCR)

Lane 3: cDNA (Identification of mechanisms underlying BP formation with RT-PCR)

Lane 4: H<sub>2</sub>O

Lane 5: no RT
