# Supplementary material for: Characterization of a Read-through Fusion Transcript, BCL2L2-PABPN1, Involved in Porcine Adipogenesis
Source: Genes (Basel). 2022 Feb 28;13(3):445. doi: 10.3390/genes13030445 (PMC8955228; doi:10.3390/genes13030445)
Supplement: Supplementary file 1 [file genes-13-00445-s001.zip › Table S2.xlsx]

## Sheet: Sheet1
Read-throughs expressed in all of the four samples
chrom5p	start5p	end5p	chrom3p	start3p	end3p	chimera_cluster_id	strand5p	strand3p	transcript_ids_5p	transcript_ids_3p	genes5p	genes3p	type	distance	breakpoint_spanning_reads
chr8	128461096	128798142	chr8	128883085	128886399	CLUSTER1150	+	+	ENSSSCT00000010044.2:0-1978,ENSSSCT00000010044.2:0-1900	ENSSSCT00000031679.1:0-245	ENSSSCT00000010044.2	ENSSSCT00000031679.1	Read_Through	84942	AATTCTATCTTCAGTATAGGTAAGAAAAGTAATTGCTAAGTCTGCTCATTAACAATGCCAGAGTAATCATGAAGGTTATGGTAGAAAATTTGGACTTTTTTTTTTCTTTCTTTTTCTCTTTAGTGACTGAGATGCTGGTGAATGTCCTCAATATTTGCTCAGATGATGAACTAGGGTCAGAAGAAGATGGATTTGATGGT@CCTTTAAGTCTTTTTCTTTAAAGAAAATGAAAGGTAAAGGCTCCCCGTGGTTGTGTCTTTGCAGAGAAGAGAGTGAGAGTGTGCTGACGCTGAAAGGCCTGACGCCCACAGGCATGCTCCCCAGCGGAGTGCTTTCTGGAGGGAAGCAAACCCTGCAAAGCGGTAAGCAGGCCCATTGGTGTGACTGTGTGGGCACCT…
chr6	81586445	81603571	chr6	81613749	81615873	CLUSTER2482	+	+	ENSSSCT00000024346.1:0-322	ENSSSCT00000027303.1:0-224	ENSSSCT00000024346.1	ENSSSCT00000027303.1	Read_Through	10177	AATGCAGGGAGACTAGGCTAAAGGCTATAGGAGAGAGAGATTCTCATTTGAATGACATAGTTTTTGTTTGTTTTTTTCTTTTTAGGTTGCTATGGTGACAGACTATGGAGCCTTTATCAAAATCCCAGGCTGTCGGAAACAAGGTGGGAGCCAATAACTTGAAATTCATCATTCTCATTTCACTCTCTGCTGTCACCGCC@TTAGAGGGGCCAACAGTCAGTAGTATCCTTTTCTTTACAGGCAAGAAGAGAGCGGAGGAGGTCCTTCCAGGATTACACTGGGCAGAAGATCACTCTCGAGGCTGTCCTGAACACTACCTGCAAGAAGTGTGGCTGTAAAGGTAAGGCAAAGCCTCTGCCATTTCAGTTTTTCTCTCCTTGTAGATAGACCCTTTACTG…
chr6	49808801	49819404	chr6	49799584	49801691	CLUSTER454	-	-	ENSSSCT00000023329.1:0-1178,ENSSSCT00000023329.1:0-2370	ENSSSCT00000003486.2:528-1806,ENSSSCT00000003486.2:425-1806	RASIP1	MAMSTR	Read_Through	-1744	CACAGCTGGGGCAGAGCTGCCGGGGCCTGGCGCTGAGCTGGGGGCCATGCCTCCTGGGTTGAGACCTACCCTGGGCGTGTTCCAGGCAGCCCTGGAACTGACCAGCCAGTGCGAGCTGCACCCGGATCTTGTGTCTCAGACATTTGGCTACTTGTTCTTCTTCTCCAATGCATCCCTTCTCAACTCGCTGATGGAACGAG@GATGAAGCCCACTCCCTTCACTTCCTCCCCACCAGGAGTCTCCGGTCCCTCGCCCCCTTCACACAAGTTGGAACTTCAGACCCTCAAACTGGAGGAGCTGACGGTGAGTTTGGGGAGTAACCTCCCAGGCTGGCCCTTTCCCTCAGTGCGGACCCAGAAATCTAACCCTGCAACCCCCGCTCCATCAGACCCCAGTCC…
chr15	145524630	145555100	chr15	145589503	145629800	CLUSTER2817	+	+	ENSSSCT00000017720.2:0-1973,ENSSSCT00000017720.2:0-2121	ENSSSCT00000031305.1:0-1262,ENSSSCT00000031305.1:166-1262	ENSSSCT00000017720.2	ENSSSCT00000031305.1	Read_Through	34402	GAGTTACTATTTGAAGTGATTACGTTGATGATGGTGCTGAATTATTTCTTAGGATCCAATTCTTCGACGGTCTGGAATGTATACCGTAGCCATGGCTTACTGTGGCTCaggtaacaacaaggctattcgacgcctgctgcatgtcgctgtaagtactctggcttctcttgaatagagatggaaggGAACGTTTGCAGATT@TAAAATATTTTATCTATAACATTGTCTTCTCTATCTCTTGTTTTTTACCAGGACCCCTGAACAGTGTCCCAGCGTGGTTTCATTGTTGTCAGAGAGTTACAATCCTCACGTGCGTTACGGAGCCGCAATGGCCCTGGGTATCTGCTGTGCTGGTACAGGAAACAAGGTAAACCCAAAGCCAGTGAGGTCAGTCCTTTC…
chr5	16524559	16573126	chr5	16587574	16600458	CLUSTER297	+	+	ENSSSCT00000022818.1:0-889	ENSSSCT00000022832.1:172-1185,ENSSSCT00000022832.1:0-1185	ENSSSCT00000022818.1	ENSSSCT00000022832.1	Read_Through	14447	AAAATAGAGAAATACAATGTTCCGCTGAACAGGCTGAAGATGATGTTTGAGAGAGGTGAACCAGCTCAAACCAAGGTAAGGATCGGGCGAGTTTAAAACTTGAAAGAGCCGATTCAAGTCACGAAACAAAGCCATTTTTCTATTCTAGACGGTTTGAGTAGTGGCAAGTATGTGGTCAGTATGTCTATTGATTCACACTA@TCACATCATTTGCATGCTTGCAGGTCAGTTGTCATCTTCGGCATTCAACACGGAGAAAAGCGAGAGTAGGAGAAATCTGGAGTTCCCTCGCCTGTCAGACACCTCCATAAAGGATCGAATGGCCAAGTATCAGGCAGCTGTGTCCAAACAAAGCAGTTCAACCAACTATACAGTATGTGTTCAGAGTCATTCATTCGT…
chr9	109601469	109716060	chr9	109717446	109719221	CLUSTER1288	+	+	ENSSSCT00000016779.2:0-723	ENSSSCT00000025242.1:0-300,ENSSSCT00000025242.1:165-300	ENSSSCT00000016779.2	ENSSSCT00000025242.1	Read_Through	1385	AGCTTTAAAAATCATTTAAAATTTGCTTTTTATTTTGTTGATATTTTCTTTTTCATAGATGAGGAGCTTTTCTCTGGAATGTATATCGATTTCATGGGGACAGATGCAGCTATTTTTCGAAGTTTAACCAAGAGGAATGCAGTCAGAACTGATCAACATAATTCCAAATGGCTAAGTGGTAAGATAACCATTTGTGCATT@TAACTTTGTATTTTTTTCCTAGAACCTATGTTTGTGGATGCACATGTCATCCCAGATGGCACTGATCCAAATGATGCTAAGGTGTACTTCTTCTTTAAAGAGAAACTGACTGACAATAGCAGAAGCACAAAACAGATTCATTCCATGATTGCTAGAATATGCCCTGTAAGTATTAAAGTTGTTCTAATTTGAAGAATG…
chr16	29677850	29681153	chr16	29666045	29666999	CLUSTER255	-	-	ENSSSCT00000028237.1:0-256,ENSSSCT00000028237.1:0-585	ENSSSCT00000029291.1:127-457,ENSSSCT00000029291.1:0-457,ENSSSCT00000029291.1:216-457	ENSSSCT00000028237.1	ENSSSCT00000029291.1	Read_Through	-4552	AAAACTACAGTTCTGGCGATGGACCAAGTTCCAAGAGTCACAATTGCTCAGGGATATGATGCACTAAGCTCCATGGCCAACATGCTGGGTAGGTTGATTCTTTTCCATTCCAGCTGAACAAAAAGCACAATGGTACTTGTTCATGTTCACTGTATCACTGTATCTCTTGCTGACAATGACTTTACTTGTGATAATTGTTG@ATTCTGATAGTTGGTGGAGGTGTCGCTGGGCTCGCTTCTGCAGGTGCAGCAAAGTCAATGGGTGCGATTGTTCGGGGATTTGACACAAGGTGAGTGCTTTACTAGTGATGGCTGTTAAGGTAAAAACGTTTTGTTTCAGGTGGATGTTATATTTTCCTTAGGCTTTATATATTGAGGCAGCACACTGAAACTGCTCTA…
chr12	62850792	62919116	chr12	62938123	62950225	CLUSTER204	+	+	ENSSSCT00000019644.2:0-1086,ENSSSCT00000019644.2:0-1233	ENSSSCT00000019643.2:0-1005,ENSSSCT00000019643.2:114-1005,ENSSSCT00000019643.2:186-1005	ENSSSCT00000019644.2	ENSSSCT00000019643.2	Read_Through	11926	CCGAGCCACTGTCGCAAATGTGTCTCTGTCTTCTGCTGACTGTGCGATGCCAGGATGACATCATCGATGACGTGGACAGCTTCCTCGCGGCGGCGGAGACCCTGAAGGAGAGGGGCGCCTATAAGATCTTCGTGATGGCGACCCACGGCTTGTTGTCCTCCGACGCCCCCCGGCTCATTGAGGAATCTGCCATCGACGAG@TCTTCATGCCGGGCCAGCAGGAACACAGTGAGCGGCTACTTCCTGGCGGGCCGGGACATGATGTGGTGGCCGGTGAGTGTGCCCTGACTCCTCCCACCCCTTCCGGTGGTCAGCCGGCATCTGCGTCCCTGTGGCCTCCGCACCCAGGGTGGGTCCCCAGGCTGGGCATGGAGGGACAGGGCGCTGGAGGTGGCGGGT…
chr4	113798914	113799226	chr4	113709120	113756855	CLUSTER3001	-	-	ENSSSCT00000036090.1:0-312	ENSSSCT00000007378.3:0-5904	ENSSSCT00000036090.1	ENSSSCT00000007378.3	Read_Through	-42058	CTGGGATTTCTCGGCTCGCGAGGAGAGCGGAGCAGGCGCGCGGCCCAGGCGGAGGAGCGCTGACTCTGGAGCAGCCGGAGCTggaggaggaggaggaggagaggcggcggggaaggaggaggagggggagAGTCGCTCCCGCCCGGCGAGCATGGGGCGCCTGGCGCCGAGGCCGCTGCTGCTGGCGCTCTTGTCGCTGG@CTCTTTGTCGAGGGCGTGTGGTGAGGGTCCCCAAGGGGAGCCTGGTGCGGGTGGAGGGCACCGAGCTGGTCATCCCCTGCAACGTCAGTGACTACGACGGCCCCAGCGAGCAAAACTTCGACTGGAGCTTCTCGGCCCTGGGGGGCAGCTTCGTGGAGCTCGCCAGCACCTGGGAGGCGGGCTTCCCCGCCCAGCTGT…
GL894445-1	11388	14824	GL894445-1	14886	23164	CLUSTER2460	+	+	ENSSSCT00000032494.1:0-188	ENSSSCT00000030840.1:67-211,ENSSSCT00000030840.1:0-211	ENSSSCT00000032494.1	ENSSSCT00000030840.1	Read_Through	61	TGCCCCACCCATATACCCTCCCCAACCCCACCGCTGGAGAGTTAGACTAGGACAGCAGACTCCATCAGGACACGTGGGCCGCCTGGCACTGTGGCTCCCTTCTCTTGGCCTCTTACTGTCTCTGTCCTTGCAGGTGCCTGTCTTGTGTCAACAGCTCCTTCCGCTGCCATTGGTGCAANNNNNNNNNNNNNNNNNNNNNN@NNNNNNNNNNNNNNNNNATGACCCCACCACCTGCTCCTTCCAGGAGGGCCGGATCAATGTTTCAGAGGTAAGTAGAGCTCAGCCTGGCTGCGTCCCCTGCGAATCTCTGTGGCCCTCCCTTTTCAGATGGTCTGCCCGTCAGCTTGGCCATCTCCCTGTCCTGCACTTGTCCCAAAGTGTTCGACATGCTAGAAGCCC…
GL893077-1	10936	50414	GL893077-1	1132	9649	CLUSTER2966	-	-	ENSSSCT00000000153.2:0-2271,ENSSSCT00000000153.2:0-2147,ENSSSCT00000000153.2:0-2401	ENSSSCT00000025832.1:0-1394	ENSSSCT00000000153.2	ENSSSCT00000025832.1	Read_Through	-1286	CCTCCACGTGCAATGCCCCAGGATCTCACTGGTGGTGTCCCCCTCCTGAATGGCCTTGGCTTTGTCGTAGTGCGGCTGAAGAAGGAGGAGAAGAGCCGGCAGGAGCTGGAGAAGCTGAAGAGGAAGCTGGAGGGCGAGGCCAGCGACTTCCATGAGCAGATCGCTGACCTGCAGGCGNNNNNNNNNNNNNNNNNNNNNNN@GCCAAGGCCAACCTGGACAAGAACAAGCAGACGCTGGAGAAAGAGAACGCGGACCTAGGCGGGGAGCTGCGGGTGCTGAGCCAGGCCAAGCAGGAGGTGGAGCACAAGAAGAAGAAGCTGGAGGTGCAGCTGCAGGAGCTCCAGTCCAAGTGCAGCGATGGGGAGCGGGCCCGGGCTGAGCTCAACGACAAGGTCCAC…
chr15	145685645	145732897	chr15	145786759	145805664	CLUSTER1307	+	+	ENSSSCT00000024888.1:0-1097	ENSSSCT00000028403.1:0-382	ENSSSCT00000024888.1	ENSSSCT00000028403.1	Read_Through	45763	CTCCTAGAAAGCGTTGTGTCTTTTTTCCCAATTAGGTGAAACTACCCAATTGAAAAGTAGTACCTCAGGCCCTGAAATGTTACCTCTTAATCTCTCCAATGCTTTCTAGGGCATGGAAGACATCCTTCGCTGCTTCATCCGAGAAGGCAATGCCGAAATGATCCGTCAGATTGAATTTATCATCAAGCAGCTTAATTCAG@TTGCAACAGGAGGACCACGACACTATGGAAGCCGATCTGGACAAAGACGAGCTGATCCAGCCGCAGCTCGGAGAACTCTCAGGCGAGAAGCTTCTGACCACGGAGTACTTAGGAGTAAGTACCACACGGCGCGGGTGTGGACCCCGAAATAGAAAGGAGAGATGGGTCACTGATGGATGTAGTGTCTGCAATAACACA…
chr4	134731344	134770180	chr4	134785875	134804045	CLUSTER2721	+	+	ENSSSCT00000007543.2:0-1397	ENSSSCT00000007544.2:164-4648	ENSSSCT00000007543.2	ENSSSCT00000007544.2	Read_Through	663	TGCTCTTAAAAAGGCAAAATTGTTGTGCATGCAGCGTCAAGATGAGTATGAGAAAGCAAAATCGTCCATGTTTCGTGCAGAAGAGGAGCATCTTAGCTCAAGCGGTGGATTAGTAAAAAATCTCAACAAGCAGCTAGAAAAAAAGCGAAGGCTGGAAGAGGAGGCTCTTCAGAAAGTAATCATCTTTTCTGTTATTTGCA@GTAACAGTTAACCTCTTCCAGATGCAGCACTTGCAGGTGGCCTCCCTGGCGGACAGCTTGCAGTCTCTCTGTGATGGTGCCAAACTCTATGACCCGGGCCAAGAGTACAGTGAGTTTGTCAGGGCCACGAATCCAACTGAAGAAGAAAAAGTTGATCGGTGAGAACTAATGTATGGGTGAAATTATTTCAAGAGATAA…
chr15	85315334	85379366	chr15	85380835	85539165	CLUSTER229	+	+	ENSSSCT00000017355.2:0-1947	ENSSSCT00000017356.2:0-3282	ENSSSCT00000017355.2	ENSSSCT00000017356.2	Read_Through	1468	AGTTGTTTCTTTATAATTTACAGATACTCAGATGTATGACTTCTATTTTTAATTTTAGGAATGTCTGATGATGAGATTCTCAGGGCAGAAATGGTAGCCCAGCTGTGTATGAATGACAGGACACATAGTTCATTACTGGACCTCATATCCTTTGAAAACTTAGTTTTCTGTTTGTTGCAGGATCTAAGATATAAGTAGCA@TTTTAAAGCTGGCTTTAATTATTTTTTTTCTTGACGCATACATCATATTCCAGAAAATCCAAATCCAAAAAGTGGCATTATTCCAGGCAGTTATAGCTTTGAATCAGTTTTATCAGCTGTAGCTGATTTTAAGGCTCCTGTTTTTGAACCTGGAGGTTCTATGCAACAAGGCATGTATACACCTAAAGGTATGTTTAT…
chr6	5583398	5823424	chr6	5213121	5364583	CLUSTER3150	-	-	ENSSSCT00000031996.1:0-299,ENSSSCT00000031996.1:0-525	ENSSSCT00000002977.2:0-2388,ENSSSCT00000002977.2:172-2388	ENSSSCT00000031996.1	ENSSSCT00000002977.2	Read_Through	-218814	TTTGACGCGGACGACCCAGCCACGGATAACGCCCTCCTGCGCTATAACATCCGGCAGCAGACGCCTGACAGGCCGTCTCCCAACATGTTCTACATCGATCCTGAGAAAGGAGACATTGTCACCGTCGTGTCACCTGCACTGCTGGACCGGGAGGTGAGCAGGACAGCACACAACTTCTTTTTCATGAAAATCGAATTGCG@TCATCCTCTCTGTTGTGTATTTGCTTTGTAGACTCTGGAAAATCCCAAGTATGAATTGATCATTGAGGCTCAAGATATGGCTGGACTGGATGTTGGATTAACAGGCACGGCCACAGCGACCATCATGATTGATGACAAAAACGATCACTCACCGAAATTCACCAAGAAAGAGGTAAACCCAAACTGAACAACCACCCT…
chr6	69887310	69905302	chr6	69907198	69914781	CLUSTER2504	+	+	ENSSSCT00000003864.2:0-2660,ENSSSCT00000003864.2:0-2474	ENSSSCT00000022571.1:0-1091	ENSSSCT00000003864.2	ENSSSCT00000022571.1	Read_Through	1895	CCTCTGTCTCACAGATGAAGATGCTGGACAGCGAGAACACCAGGCTGGGCAGAGAACTGGTGGAGCTGCAGGGCCGCCTGGCCCTTGGCGAGCGGGCAGAAAAGGAGGGCAGACGGGAGGCCCTGGGCCTCCGACAGAAGCTGCTGAAGGGAGAGGCCAGCCTGGAGGCTGTGCGGCAGGAGGTAACTAGACCTCAGGCA@GGCGGCTTTGATGACACCCACCTCCTGACCTTGCCCCCTCCCCAGCTCCAGGGAGCCCAGCGGAAGCTGCAGGAGCAAGAGGGCGAGTTCCGGACCCGCGAACGAGGCCTGCTGGGCTCCCTGGAGGAGGCACGCGGCGCCCAGAAGCAGCAACTGGACCACGCCCGCAGCCTGGAACAGAAGTTGGAGGCTgctcgg…
GL893006-1	1370	22654	GL893006-1	40844	52697	CLUSTER3194	+	+	ENSSSCT00000022719.1:0-421	ENSSSCT00000030613.1:40-671,ENSSSCT00000030613.1:129-671,ENSSSCT00000030613.1:0-671	ENSSSCT00000022719.1	ENSSSCT00000030613.1	Read_Through	16584	CAACGAGTTCAAGATCAGCATGAAATTGGAAGCCCAGGATCCCAGGAACACCACGTCCACCTGTATCGCCACAGTAGTCGGGCTGACAGGTGCTCGCCTCCGCCTTCGCCTGGACGGCAGTGACAACAAAAATGACTTCTGGCGGCTCGTCGACTCAGCTGAAATCCAGCCTGTCGGNNNNNNNNNNNNNNNNNNNNNNN@GATTTCGGCTGAATGCCTCCTCTTGGCCCATGTTCCTTTTGAAGACGCTCAATGGAGCAGAGATGGCTCCCATCAGGATTTTCCACAAGGTACGGAGTCCCTCAGATGTCACCAGCTGCAAACTCCTTAAAGTCAGATGCTTACATTCTTTGTGTTACTGGATCTCCGATGTGTACATTGTATTTATGGCCTGAGGAC…
chr3	102939969	103176415	chr3	103199735	103254998	CLUSTER2529	+	+	ENSSSCT00000032410.1:0-1103,ENSSSCT00000032410.1:0-1220	ENSSSCT00000009261.2:0-1512	ENSSSCT00000032410.1	ENSSSCT00000009261.2	Read_Through	23319	GAAAATACCCACTTTCACTCTTCTGTCACCCAGGCCTCAGGGAGAGAAAACATCGATTTATTTTCTGTTCTTTACTTTTCTAGGCAAAATCCATGTTTGGTGACCAGAGCTGTGTGTATTGATATTCTCTTCCTGTTGACTCGCTGCCTTGACAAACCCGCAAAAGGCAACCAGCCAGGTATGATTCAGAGTTATATCAT@CGTGGAATAAAGCGAGTACCTCTTTTCCTTTGCTTTTTTTGCCTTTTAGTTCTGGAGCATGTGGACCTCTGGGAGGAAGTCAGAAGGATCGTCTCAGAATCAGAGCTGATAACGGGATTCCGCTATACCTTCACGGTGCCCGGCCTGCCCCAGTACCTCCAGAGCCTCACCAAGCTGGCCATCGCTGCGGTGTGGGCG…
chr3	130939494	130942351	chr3	130786234	130938479	CLUSTER1895	-	-	ENSSSCT00000030313.1:0-304	ENSSSCT00000009432.2:0-2771,ENSSSCT00000009432.2:109-2771	ENSSSCT00000030313.1	ENSSSCT00000009432.2	Read_Through	-1014	GTGAAAGCCAATTTGTTTTTTCTGGACCACTTTTCAGGTTATTCTAAAAGTTGGGATGTTTGTAGCCAGTTGGGACAATCAGAAGGTTACCAAGACTTGGCCACTCGTCAGGAGCTCATGGCTTTTGCTCTGACACATTGTCCCCCCAGCAGCATTGAGCTTCTTCTGGCAGCTAGCAGCACTTTGCAGACACAAGTAAG@TATCATGTTCTTTTTTCAGATTCTTTACCAAAGGGTGAATTTCCAAATCCATCCAGAAGGAGGAGAGAGTATCAGTGTCTCACCGCTGACTAGTAAAGCGCTGCAAGAGGTGGGCAAGGATGAGAGGGAGGGTGAGAGATGGATGAAACGGAGCTGCCTGTGTGTGTGTGTGTGGAGAGACTCTTGTTCTTTTACACC…
chr6	69143283	69174387	chr6	69134873	69136744	CLUSTER124	-	-	ENSSSCT00000003848.1:0-1196	ENSSSCT00000003847.1:0-1871	DDI2	RSC1A1	Read_Through	-6538	CTATTGACCTCAAGAAAAATGTACTGGTGATCGGCACCACAGGCTCACAGACGACCTTCCTTCCCGAGGGAGAGTTACCAGAGTGTGCCCGGTTGGCGTATGGGGCTGGGCGAGAGGAAGTACGGCCAGAGGAGATTGCAGACCAAGAATTAGCAGAAGCCCTTCAAAAATCCGTAGAAGATGCAGGTATTTGGAGTGGC@ATGTCATCATTACCAACTTCAGATGGCTTTAACCATCAAGCCCATCCTTCAGGACAGAGACCTGAGATTGGTAGTCCTCCAAGTCTTGCTCACTCTGTCTCTGCCTCAGTCTGCCCTTTCAAGCCCAGTGACCCAGACAGCATTGAACCTAAAgctgtgaaggctgtgaaggctttgaaggctTCAGCTGAATTCCAG…
chr16	77897395	77904952	chr16	77915954	77918716	CLUSTER1400	+	+	ENSSSCT00000018602.2:0-579,ENSSSCT00000018602.2:0-681	ENSSSCT00000018601.2:392-578,ENSSSCT00000018601.2:0-578	ENSSSCT00000018602.2	ENSSSCT00000018601.2	Read_Through	9237	GCACAACCAACAACTGCCGTTACAATGAGACAGTGACTCTGACGCCCACCATGGACTCTCGCCTCTACATGCTCACCTTCCTGCCCTTCCTGGCGCTGCTGGTTCTCATCCGGAACCTCAGGGTCCTGACCGTCTTCTCCCTGTTGGCCAATGTCAGCATGCTCGTCAGCCTGATCATCATCACCCAGTACATCATCCAG@atggactagattttgtttatccatttctccgttagcggacacttgggttgcctccaacttctatctgctgtgattaatactgctatgaatacaggtacacaaatagctgtgcatgctcccatttcctattcttttgtgtatataccctcagaagtagcatGCCTTTTTTCTTTGTGCTTGTGTTCCTTTTTCTCCTCC…
chr9	32147046	32148585	chr9	31963173	31982580	CLUSTER2501	-	-	ENSSSCT00000016333.1:0-1439	ENSSSCT00000026492.1:204-923,ENSSSCT00000026492.1:0-923	ENSSSCT00000016333.1	ENSSSCT00000026492.1	Read_Through	-164465	agcctcagcaacagccgcagccgcagcaacagccacagccaccagcccagccCTCACAACCACTGTCAAGCCAGCCTTTGCTAAGGTCGCCCTTACCACTTCAGCAAAAGATCCTCCTGCAGAAGATGCAGAATCAGCCCATCACAGGACTGGGGTACCAGGTCTCCCAACAACACAGACAGGTAAGGGCTGTGTTCCTC@GATCAACACTCTGTGGTAGGCCAGAACACAGGCCCCAGTCCAAGTCCCAACCCCTGCTCAAATCCAAACACTGGAAGTGGTTACATGAACTCCCAGCAATCACTGTTGAATCAGCAATTGATGGGAAAGAAACAGACTCTCCAGAGGCAGATCATGGAGCAGAAACAGCAGCTTCTCCTCCAGCAGCAGATGCTGGTT…
chr7	80971089	80971556	chr7	80985078	80988311	CLUSTER343	+	+	ENSSSCT00000002262.1:0-467	ENSSSCT00000002263.2:359-1007	BCL2L2	PABPN1	Read_Through	12025	GCTTCACCCAGGTCTCTGATGAACTCTTCCAAGGAGGCCCCAACTGGGGCCGCCTTGTGGCCTTCTTTGTCTTCGGAGCTGCACTGTGTGCTGAGAGTGTCAATAAGGAGATGGAGCCACTCGTGGGACAAGTGCAGGAGTGGATGGTGACCTACCTGGAGACACGGCTGGCCGACTGGATCCACAGCAGTGGGGGCTGG@GAGCTGGAAGCGATCAAAGCTCGAGTCAGGGAGATGGAGGAAGAAGCTGAGAAGCTAAAGGAGCTACAGAACGAAGTAGAGAAGCAGATGAATATGAGTCCACCACCAGGCAATGGTGAGTAACTGGCGGTTACACGCGGATCCCAGGTTCTCGCATTGGAAGGGTTATGGGAGCACGGTTCATATGGGATTGGATGC…
chr11	76980014	76985104	chr11	76974428	76978730	CLUSTER2627	-	-	ENSSSCT00000031501.1:0-434,ENSSSCT00000031501.1:0-281	ENSSSCT00000031564.1:158-847,ENSSSCT00000031564.1:0-847	ENSSSCT00000031501.1	ENSSSCT00000031564.1	Read_Through	-1283	CAGTGAGGGCATCGGCGCACACTCACTGTGTTTCCCCCCGCCCCCAGCATGCTGTCCTACCGCTCAGTTGACATCCGGAAGAGTCTGCAGCTGGAGGAGCTGCTTGCGAGGGAGCAGCTGGAGTACACCATCGAGGAGGAGGTGGCCAAGCAGACCATTCGCATGTGGCTGAAAAAGTGCTTGAAGCGGATCAGAGCCGT@CTCCATAGAAACAGCAGCAGTCCTGCAGCATCATCCACAGCCTGAGAGAGAGCCAACAGCAGGAGCTGAGCCGGTTTCTGAATCCGCCCAGCATCGAGACCACGCAGCCCAGCGAGGACCAGAACGCCAACAGTCAGGAGAACAATGTGCAGCCTGAGGTATGGGCAGGAGGCGTCCGCCGCCCAAGGATGTTAACGA…
chr13	132878216	132878564	chr13	132648183	132838841	CLUSTER2189	-	-	ENSSSCT00000023420.1:0-348,ENSSSCT00000023420.1:0-476	ENSSSCT00000024873.1:0-439,ENSSSCT00000024873.1:197-439	ENSSSCT00000023420.1	ENSSSCT00000024873.1	Read_Through	-3185	GATGGGCATTTGTGCCCCGGCGGGAGGCGGGGCGGGCTCACATTGGCCCAGCGGGCGCCCCTCCTCGCCGGGTTGACCCGGCCAAGGCCCAGGAAAAGCTGAGGCGATCTCGGCGAGAGAGGAGAAATGGCTGAGTTTACGCGGCTGCAGAACGCCCTGGCGCTGCTTCGCCTACGAAACCCGCCGGTCAACGCTCTCAG@TTTTCCTTGTCTTTGTATTCTTAGGTGCCGATATCCATGGCTTCAGCGCTCATAAAACCTCTGACTTAACACTGGGAGATATAGTAGATAAAATACAGAGATATGAGAAGCCTGTGGTGGCTGCTATCCAAGGCTTGGCTTTAGGAGGAGGACTGGAGCTGGCCCTGGGCTGTCACTATAGGATTGCCCATGCAGAGG…
chr7	97904219	97943549	chr7	98435256	98486846	CLUSTER243	+	+	ENSSSCT00000002560.2:0-805	ENSSSCT00000023246.1:144-864,ENSSSCT00000023246.1:0-864	RAD51B	ENSSSCT00000023246.1	Read_Through	378769	ATTCTCCTTTTATAGGATTGAATCCTTGGAAGAAGAAATTATTTCAAAAGGAGTTAAGCTTGTGATTATTGACTCTGTCGCTTCTGTGGTAAGAAAGGAGTTTGATACACAACTTCAGGGCAACATGAGAGAAAGGAACAAGTTCTTAGCAAGAGAAGCTGCCTCTTTGAAGTATTTGGCTGAGGAATTTTCAATCCCAG@GCACTTCTGGATCCAGCTGTATGACAGCTGCACTAGGAAACACCTGGAGTCACAGTGTGAACACCCGGCTGATTCTCCAGTACCTTGGTTCAGAGAAAAGACAGGTGAGTACTTTGACAATATTCTCCATCAAGGTGAGAGAACAAGATGTACCAGTCTGTGTTCATCTTCTAAAAGCACTGGCCACCCTATCTGTTC…
chr7	44309585	44309656	chr7	44471476	44474466	CLUSTER2213	+	+	ENSSSCT00000001891.1:0-71	ENSSSCT00000001892.1:941-1874,ENSSSCT00000001892.1:1180-1874,ENSSSCT00000001892.1:1048-1874,ENSSSCT00000001892.1:1018-1874	ENSSSCT00000001891.1	ENSSSCT00000001892.1	Read_Through	150245	AAATCAGTTCGAGGAAAGGGAAAGGGGCAAAAAAGAAAGCGCAAGAAATCCCGGTATAAACCCTGGAGCGTG@TCCCTGTGGGCCTTGCTCAGAGCGGAGAAAGCATTTGTTTGTACAAGATCCGCAGACGTGTAAATGTTCCTGCAAAAACACAGACTCGCGTTGCAAGGCGAGGCAGCTTGAGTTAAACGAACGTACTTGCAGGTTGGTTCCCAGAGGGCAAGCAAGTCAGAGAGGGGCTTCCACagagatggggagagagagagagcgag
chr2	12138085	12147199	chr2	12129454	12131598	CLUSTER444	-	-	ENSSSCT00000014375.2:0-1343	ENSSSCT00000027526.1:114-2258	ENSSSCT00000014375.2	CNTF	Read_Through	-5110	GAGAGTGCCTCCTGCTGGAAGCTGAAGGGATGTCAAAGTCCTACTGTAGTGGGACGGAGCGGGTGAGCCTGATGGCTGATGGGAAGCTCTTTGTGGGAAGCGGCAGCAGTGGGGGCACTGAAGGGCTGGTCATGAACTCGGATATACTCGGTGCTACCACAGAGGTTCTGATTGAAGATTCAGACTCTACTGGACCTTAG@GTGAAGCATCAAGGTCTGAACGAGAACATCAACCTGGACTCTGTGGATGGTGTGCCAATGGCAAGCACTGATCGATGGAGTGAGCTGACGGAGGCAGAGCGACTCCAAGAGAACCTCCGAGCTTACCGTACCTTCCACATTATGTTGGCCAGGCTGTTAGAAGACCAGCGGGAACATTTTACTCCAGCTGAAGATGAC…
chr6	50915412	50924335	chr6	50930005	50942091	CLUSTER2414	+	+	ENSSSCT00000027776.1:0-1254	ENSSSCT00000003563.2:0-1387	ENSSSCT00000027776.1	ENSSSCT00000003563.2	Read_Through	5669	GGCGGCCCGAGAGGTTGAGGCCCTGACCCAGCGCCTGACTGAAAAGACGGAGGTGGTGGAGCGGCTGGAGCGGGGCCGGCGGCGGCTGCAGCAAGAGCTGGACGATGCCACAGTGGACCTGGAGCAGCAGCGGCAGCTCGTGAGCGCGCTGGAGAAGAAGCAGCGCAAATTCGACCAGGTGAGGCTCCACAGGTAACCCA@TCACTCTCTGTCCCCACCAGGTACATGAGCTGGAGCGAGCCCGCCGGGTAGCCGAACAAGCAGCCAGCGACCTGCGAACACAGGTGACAGAGCTGGAGGACGAGCTGACGTCCGCCGAGGATGCCAAGCTGCGCCTGGAAGTGACCGTGCAGGCTCTCAAGGCACAGCACGAGCGTGACCTGCAGGGCCGGGATGAGG…
GL893735-2	42	47121	GL893735-2	55563	63064	CLUSTER3180	+	+	ENSSSCT00000023704.1:0-1791,ENSSSCT00000023704.1:0-1568	ENSSSCT00000030156.1:138-2230,ENSSSCT00000030156.1:0-2230	ENSSSCT00000023704.1	ENSSSCT00000030156.1	Read_Through	8441	GTTTCTTGTCCGAGAGCTGCTCAACGTGATCCAGGACTACACCTGGGAGGACAACAGTGATGACAAAATCCGCATCTACACCTGTGTCCTGCACCTGCTGTCCGCCATGAGCCAGGAGACCTACCTCTACCACATAGACAAAGGTAGCCATGTCCCCTCCCCCAACGCCCTGCACCCAGCTTGAACTTCCTAGAGGTCAA@NNNNNNNNNNNNNNNNNNNNNNNNNNNNNNNNNNNNNNNNNNNNNNNNNNNNCCAAGTTTCTGGCTGAAAACAACAAACTGTGCGAGACGGTGATGGCTCAGATCCTGGAGCATCTCAAGACCCTGGCCAAGGATGAGGTTGGTGCCCCCGGCCACCTGGCCAGTTCCAAGGGCGCTTGGACATTGGTTTGTCCTGTG…
GL893841-1	50025	69057	GL893841-1	11763	45484	CLUSTER2133	-	-	ENSSSCT00000026163.1:0-304,ENSSSCT00000026163.1:0-420	ENSSSCT00000000613.2:0-2993	ENSSSCT00000026163.1	ENSSSCT00000000613.2	Read_Through	-1817	CCAGAGTATGCTTATTTTAAACATTTCTTGTTCATACAGACAGTGTGGTATTGAATAGTGAACTGATTTAAAATTTATTTTTCAGATGAACCAGAAACTCGAGATGCGTGGTGGGCAGAAATCAGACAAGAAATAAAATCACATGCCAAAGCATTAGGCTGTCATGCTGTAGTGGGCTACAGTGAGTCAACTAGCATCTG@AGTGCATAGAATTTTCAGGAATGTCTTTTTTCTTAATATGTTCATATAGGCTAGAAGAAAACTTGCCTGCAGGCTGTGGCTTTTGCCATATACCATATGATGAACTGAATATGCCATTTCCAGCTCATCTCACATACTGCTATAACTGCAGAAAACAAAAAGTTCCTGATGTTCTTTTTACAACTATAGACCTCCCGG…
GL896296-2	19891	21734	GL896296-2	15138	19535	CLUSTER2971	-	-	ENSSSCT00000024777.1:0-366	ENSSSCT00000019137.2:60-910,ENSSSCT00000019137.2:0-910	ENSSSCT00000024777.1	ENSSSCT00000019137.2	Read_Through	-355	TGGAGCCCCAAGGTGGGGGACTCGCAGCGCAGCTGACGGCCCCCATCTTCCCCCAGTCCCACCAGTCACCTGCGTACAGAACGGCCTCAGGTACCATGACCGAGACGTGTGGAAACCCGTGCCCTGCCAGATCTGTGTCTGCGACAACGGCAATGTGTTGTGCGATGACGTGATCTGCGACGAAATCAAGAACNNNNNNN@GGACCCTCTGGCCCCCCTGGCCGAGACGGCATCCCTGGACAACCTGGACTTCCTggaccccccggacctcctggaccccccggacccccTGGCCTCGGAGGAGTAAGTGGGAGAGTCCAGGCGTTCCTGGAAGGCCTTGGGGGCTGCGCCCCACTCCCCACCCCCATCAGTGTTTTTGTTTGTTGTTTTGGGGGAGGC…
chr9	6873378	6880902	chr9	6818048	6834709	CLUSTER119	-	-	ENSSSCT00000032470.1:0-1237,ENSSSCT00000032470.1:0-1358	ENSSSCT00000016142.2:870-3735,ENSSSCT00000016142.2:1032-3735	ENSSSCT00000032470.1	RRM1	Read_Through	-33048	CTCTTGAGCCATTTTGTTCTTTTCCTTGCTGAGCCCCCCCTTCCTCCTCCGGATGCCTTTATCCTCGTCTCTCTTTCAGACGAATGGCAATTCCAACGGCCTTGTGCCGATGCTGAGAGTGTATAACAACACAGCTCGATACGTGGATCNNNNNNNNNNNNNNNNNNNNNNNNNNNNNNNNNNNNNNNNNNNNNNNNNNN@CGACCTGGGGCATTTGCTATTTATCTGGAGCCTTGGCATTTAGACATCTTTGAGTTCCTTGATTTAAAGAAGAACACAGGGAAGGAAGAGCAGCGTGCCAGGGACCTCTTCTTTGCCCTTTGGATTCCGGATCTCTTCATGAAGCGAGTGGAGACGAATCAGGTGAGGGATAGGTACTGGGCAGTAGTGGCAGCTTGA…
chr10	56675330	56686584	chr10	56159319	56317980	CLUSTER1574	-	-	ENSSSCT00000024429.1:0-696	ENSSSCT00000012119.2:0-5466,ENSSSCT00000012119.2:224-5466	ENSSSCT00000024429.1	KIAA1217	Read_Through	-357349	TTCCAAATCTTCTCGCAACCTCCCAAGGAGACACACTCTAGGTGGGCCTCGAAGTTCCAAAGAAATACTGGGAATGCAAACATCGGAGATGGACAGGAAGAGAGAGGCTTTCCTGGAACATCTCAAGCAGAAATATCCCCATCATGCCACCGCCATCATGGGCCACCAGGAGAGGCTGAGAGACCAGGTACGAACATGCT@ACTTCCTTTCAAATACCTTTTGCAGACAAGAAGCCCCAAATTGTCTCACAGTCCTCAACCTCCCAACTTGGGCGACCCAGTTGAGCATCTATCAGAGGCCTCCGGTGACTCTTTGGAAGCCATGTCCGAGGGAGACGCTCCAAGTCCTTTCTCCAGAGGCAGCCGGACTCGAGCGAGCCTTCCGGTGGTGAGGTCAAC…
chr14	21411271	21411465	chr14	21334496	21368554	CLUSTER470	-	-	ENSSSCT00000027721.1:0-194	ENSSSCT00000010649.2:380-2662,ENSSSCT00000010649.2:222-2662	ENSSSCT00000027721.1	CLCN3	Read_Through	-25636	ATGGAGTCTGAGCAGCTGTTCCATAGAGGCTACTATAGAAACAGCTACAACAGTATAACCAGTGCGAGTAGTGATGAGGAGCTTTTAGATGGAGCAGGTGTGATTATGGACTTTCAGACTTCTGAAGATGACAATTTGTTAGATGGGGATACAGCAGTTGGTAAGTTTGGCTTTACAACTCTTAAATATTTGTAG@GAACTCATTACACGATGACAAACGGAGGCAGCATCAACAGTTCCACACACTTACTGGACCTTCTGGATGAGCCAATTCCAGGTGTTGGTACATATGATGATTTCCATACTATTGATTGGGTGCGTGAGAAATGTAAGGACAGAGAAAGGCATCGACGGGTAAGTGTTTTCAGTCACTTTTAATTAATAGTGCATAATTAT
chr6	53415467	53420920	chr6	53412022	53415211	CLUSTER382	-	-	ENSSSCT00000033934.1:0-1842,ENSSSCT00000033934.1:0-1770	ENSSSCT00000033054.1:0-1605	LENG8	LENG8	Read_Through	-255	TCTGGGTTCTTGTGAGCATCAGGTTTGATGTCGCAGCCCTCCTCTTAGAACGAGTGCATGGAAGGAACTGGAGCAGGTCCTTGTCCTTGTGGCAAAGTCACACAGAGCCTGTGTTCACCTGCTTCCAGGTTTTGAAGAAGTCGCTGTGCATGGTCAAGTCCCACTGGAAGGAGAAGCAGGACTACGCCTTTGCCTGTGAG@GGAGACCACGAAGAGTTCAACCAGTGCCAGACGCAGCTCAAGTCCCTGTACGCCGAGAACTTGCCGGGCAACGTGGGCGAGTTCACTGCCTACCGCATCCTCTACTACATCTTCACCAAGAACTCAGGAGGTGAGAGGCACAGTCCGGCAGGTCAGGCGGCCACAGGCCCCCCGAGTCCGGCCCGGCTGACCCCCGCC…
chr3	91012765	91013954	chr3	91185716	91202776	CLUSTER2651	+	+	ENSSSCT00000009207.2:0-1246,ENSSSCT00000009207.2:0-1189,ENSSSCT00000009207.2:0-3649	ENSSSCT00000009205.2:412-1711,ENSSSCT00000009205.2:204-1711	ENSSSCT00000009207.2	ENSSSCT00000009205.2	Read_Through	9826	GCCCTCCCCACCGTCTGTTGCTACAGCCTCGCCCTCCAACATCACTGAGGACGATGAGCCTCCGGCCCGGCCTCCCCCTCCTCCTCCAGCCGGCGTAAGCCCCCAGGCGGAGCCCGCGTGGAccccggccgccccggcccccgccgcgcccccctccacgccggccgcgcccAAGCGCAGAGGCTCCTCAGGCTCAGTGG@TTGTTGACCTCCTCTACTGGAGAGACATTAAGAAGACTGGAGTGGTGTTTGGTGCCAGCTTATTCCTGCTGCTTTCGTTGACAGTATTCAGCATTGTGAGTGTAACGGCCTACATTGCCTTGGCCCTGCTCTCTGTGACTATCAGCTTTAGGATATATAAGGGTGTGATCCAAGCTATCCAGAAATCTGATGAAGGCC…
chr6	71559862	71597808	chr6	71548032	71555806	CLUSTER1399	-	-	ENSSSCT00000003874.2:0-4515	ENSSSCT00000024933.1:0-992	ENSSSCT00000003874.2	ENSSSCT00000024933.1	Read_Through	-4055	CCTGCTCTCCTCCTGCTCCAGGCTGGCCCGAGGCCGGGAAGAGTGGGAGAGTGCTGCCCTTCAGAACGCCAACACTAAGTGCAACGGGCTCCTTCCGGTCTGGGGGCCCCACGTCCCTGAGTCAGCTTTTGCCACCTGCCTGGCAAGGTGAGTGAGGAACATTGTGCATGGTAGAGAAGAGGGGTTCCCAGGAAATGAGG@AGTGGGGGACGGGGAGCCCAGCATTCAGGAAACTTAAAAGAAGACGGGAAATTGAGCAGACCCTCCTCCCCTCCTGAGGCTTCTGCACTGGTTTCATGCCACCCCTTCTGTTCCAGAACCCGAGCAACTTCCCGAGAGGAGAAGAACCTCCAGGGCTTTCTGGAGCAGCCCAAGGAGAAGTGGGTGGAGAGTGCCTTT…
chr14	52424835	52424871	chr14	52423078	52423531	CLUSTER712	-	-	ENSSSCT00000033736.1:0-36	ENSSSCT00000010999.3:0-453	IGLJ	IGLC	Read_Through	-1303	AATATTTTCGGCGGTGGGACCCATCTGACCGTCCTCG@GTCAGCCCAAGGCCGCTCCCACGGTCAACCTCTTCCCGCCCTCCTCTGAGGAGCTCGGCACCAACAAGGCCACCCTGGTGTGTCTAATAAGTGACTTCTACCCGGGCGCCGTGACGGTGACCTGGAAGGCAGGCGGCACCACCGTCACCCAGGGCGTGGAGACCACCAAGCCCTCGAAACAGAGCAACAACAAGTACGCG
GL894040-1	9969	11723	GL894040-1	5597	7656	CLUSTER2949	-	-	ENSSSCT00000030969.1:0-281	ENSSSCT00000031339.1:0-1971,ENSSSCT00000031339.1:159-1971	ENSSSCT00000030969.1	ENSSSCT00000031339.1	Read_Through	-2312	ACCAGGAAAGTTTGGTTTGGGTCCAGAATGTGTGCGTGAACGGAGTATTTCTGCTCTCTCCCCTCCGCCTCAGGATTACTGCGCCAGTAAGTTTGGAGTCGTGGGTTTTCATGAGTCCCTGAGCCATGAGTTAAAGGCTGCAGAAAAGGATGGAATTAAAACAACGCTGGTTTGCCCNNNNNNNNNNNNNNNNNNNNNNN@TTCATCTTTTGATTGTGTCACTCTCAGGAAAGAAATTGAGCCTTTTCTGCCCCCTCTGAAGCCCGATTACTGTGTGAAGCAGGCCATGAAGGCCATCCTCACCGACCAGCCCATGATCTGTACCCCTCGCCTCATGTACATCGTGACTTTCATGAAGAGGTGAGTGAGGGGGCTCCCCACGCCCGTCCCATAACTACG…
chr10	55787490	55891588	chr10	55903794	55911222	CLUSTER1077	+	+	ENSSSCT00000012116.2:0-805,ENSSSCT00000012116.2:0-942	ENSSSCT00000023555.1:166-1563,ENSSSCT00000023555.1:0-1563,ENSSSCT00000023555.1:213-1563	ENSSSCT00000012116.2	ENSSSCT00000023555.1	Read_Through	12205	GGGGAAATGTGCTTTAAAGGTTTTCTTGTACAGTAAAAACATCGCCTCCCCTTTTTCTTTTAGAACGACCAGTCCATGGACGAGATGCAGATAATTGGAGGCGAAGATCTTTCAACACTGGCTGGAAAGGTTTGTCGATGTAACTCTGCCCAGTAGGTGCCCAGGCACGGATGTGGTAGGGAAATCAGTGACCTTGACTT@CTAGAATCATCTGTCTGGATGAAAAGCCTTTTCACGCAGCCCACATGCACTAAGAGTTGAATTTGTCTGTCCTCTTTGCAAAGGATGTTGTTGGAACCGGGAGGACCATGAAAGCGTTGCTCAGTAGCATAGAGAAATACAAGCCCAACATGATTAAGGTGGCCAGGTGAGTAAGACATTCACGTCGTCCTTGTTTCT…
chr2	117651535	117936301	chr2	117400912	117404081	CLUSTER2635	-	-	ENSSSCT00000015504.2:0-1844	ENSSSCT00000025540.1:165-3334	ENSSSCT00000015504.2	ENSSSCT00000025540.1	Read_Through	-227022	ATCAAACACTGATCTCTTCCTGATATAGTTGTGGCCAAACTCTTGCTGATTTAACTTGAAAGCCATTAGTATAACTCACCACTTATTGTGTGTGTTTCAGGTGTGTGGAGGTCATCGCAAAGGAGGGACAAAACCTGAAAGAGCTGTATTTGGTGTCCTGTAAAATCACAGATTATGGTATGTAATGAGCCATTGGCCTA@GTCAATGAAGTGACGGTGGAACAACTGGTGCAGCAGTACCCCCATATCACCTTCAGCACCGTCCTGCAGGACTGCAAGAGGACCCTGGAGAGGGCCTACCAGATGGGCTGGACCCCCAACATGTCTGCAGCCTCCTCCTAATAGCCCTGCCCACGTGGAGGACCACACAGATCACCCATCAGGGCCGAGAGCAATGGT…
chr11	2125996	2138956	chr11	2038585	2124704	CLUSTER2260	-	-	ENSSSCT00000022711.1:0-592,ENSSSCT00000022711.1:0-676	ENSSSCT00000010177.2:0-1719	ENSSSCT00000022711.1	ENSSSCT00000010177.2	Read_Through	-1291	CCAAATTACTTCTAGTTTTATCATGAATATTGGAAAGTAACATAAGCAAACAGATTCTTTTGTAATGTAATTATGAACATTTTGTCCTAGCCATTGATGATACACCTGTTTTACAGAACCATGAAAGATTTTGAGATGATGCGAGGGATGAAAATGAAACTAAATCCTCAAAATTCTGTAAGTAACCACGCTGGGATGTT@AGGGGGGAGCCCGGGGCCTAAGGCCCCCTTTTTTTCGCTGGGCGCCTGCATGGAAGGGCCTGGACGTGCTGCTCGGCCGGCTGCTGGGGGTCTCGCTCCGTGTGCAGCAGCCTGCGCCCGGCGAGGTGTGGGGCCCAGGACGTGCGCAAACTGGTGAGCAGCCCCCGCTCTGCCCCGAGGCGGCCGTGGCGGGGCCCC…
chr8	42103926	42271354	chr8	41841739	41891266	CLUSTER1512	-	-	ENSSSCT00000009672.2:0-1827	ENSSSCT00000023167.1:0-1570	ENSSSCT00000009672.2	ENSSSCT00000023167.1	Read_Through	-212659	TCAGTGGAGAGCTTTCAGTGGACAAAGACCTGGGTGAAGCTGAAGAGAAAGTGAAGAAAGCGTTGGCTCAGGTCTTTTGTGAGGAGTCTGAGTTGTCACCTTTGCTGCAAAAAATCACAGGTGAGTGTTTAACAAAAATTGAGGGCATAAACGCCACTGATGCAGAAACAGGTTTAAAAATAAAGGCGTTTCGAGAAGAG@ACGAAAATATCTCTGGATTGTTTCAGGCTGTGACTCTGCAATTAACCTGACATTGCCCAAATCCAAAAGCGCTGTGGATGAACTCTTCACTTCTCTTCGAGATATTGCTGGAGCTCGGAGTCTCATGAAACAGTTTAAGTCCGTATATGTTCCTGGAAATCATACCCACCAGGCAAGTACACATGTTTCAAAGTAACC…
chr7	38746484	38858690	chr7	38909261	38909458	CLUSTER2329	+	+	ENSSSCT00000001764.2:0-278,ENSSSCT00000001764.2:0-395	ENSSSCT00000028742.1:0-197	ENSSSCT00000001764.2	ENSSSCT00000028742.1	Read_Through	30344	TCACTTCTTCTCTTCAGATTTTCAAAAGAAACAACCAGACGATGATTCCACTCCAAGTACAAGTAACAGCCAATCAGATTTGTTTTCTGAAGAGACCACCAGTGACAACAACAATACCTCGATAACCACACCAACTCTTAGTTCCAGCCAGCAACCGCTTCCGACAGAACTGAATGTAACTTCACCAAGTAAAGAGGAGT@TCACAGTCTGAGAATGAGGCCTCGCCAGTGAAACGGCCACGACTACTGGAGAGTACTGAACGCCCCGAGGAAACCAGCCGATCCAAACAGAAAAGCCGCCGTCGGTGCTTCCAGTGCCAAACCAAACTGGAGCTGGTGCAGCAGGAGTTGGGATCCTGCCGCTGTGGTAAGCATCTCCCCCATGGCGTGGTGGAGACT
chr8	124773986	124774225	chr8	124794832	124955765	CLUSTER141	+	+	ENSSSCT00000025642.1:0-239,ENSSSCT00000025642.1:0-338	ENSSSCT00000030394.1:119-3049,ENSSSCT00000030394.1:0-3049,ENSSSCT00000030394.1:65-3049	ENSSSCT00000025642.1	ENSSSCT00000030394.1	Read_Through	4156	CTGGACCGCGGTCGACGCCATGCGTGCTCTGCTGCAGCTGCTGCGCACAAGTGGGATCCGGCGCGCCGGCGCCCCTGCTGTCGCAGCCGCGCGTCTGCCGCTGGGAGCTAGCGCAgggcccgggccgcgccgcgccATGGCTCTGTACCGCACGGAAGAGCGCGGCCAGCCCCATTCGCCCGATTACCGTCTCTTTTTCA@aaCCATCTTTTCTTTTATAGGAAAATGGCATTCCTACAAAGAGAGCACGAAATGATGAATATGAGGTATATCTAAAGGTTTTTATTTGTGTGTCTCACTTTTGTTATCGTTTAAAGACTTTGATGATAATTTGCATTGTAAAGTGCTTCTGAATTATTCTCACTTGCAAAACTTGCATGTGCATTCTGAAGTTTTTCT…
chr11	8547655	8584445	chr11	8592390	8596778	CLUSTER2416	+	+	ENSSSCT00000010233.2:0-1462	ENSSSCT00000010232.2:0-600	ENSSSCT00000010233.2	ENSSSCT00000010232.2	Read_Through	5492	GGATTCTACTCTTTGTTCACATATTTGCTCAATTAAACAATTTTTTTTTCATAACCTTTGACCTATGTTTAAACTTTGTCTTCACATTCTAGGGGTGAGAGAAAGCCGAAAATAGATCTTTTCAGGACCTGCGTTGCTGCTATTCCTCGTCTGCTTCCCGATGGGATGTCAAAACTTGAACTTATTGACTTGCTGGCAAG@ATGATTTTATTGTCTTTATCCGTCTCCCAGGCTCTCGATTCACATGGACGATGAACTGCGACATATTGCACAGAACTCTCTTCAGGGTCTGCTGGTGGACTTCTCGGACTGGCGGGAAGATGTCCTGTTTGGCTTTACCAACTTCCTGCTCCGGGAAGTAAATGACATGCACCACACACTCCTCGATTCATCCCTCAA…
chr15	88092853	88257745	chr15	88315398	88416686	CLUSTER2096	+	+	ENSSSCT00000031710.1:0-1336,ENSSSCT00000031710.1:0-1241	ENSSSCT00000017377.2:77-3681,ENSSSCT00000017377.2:0-3681	ENSSSCT00000031710.1	RAPGEF4	Read_Through	57276	CAGATGCTTCCTGACACCCTGCGTTTCTGCTTTTTAACATGTAAATCCATGAATGCTCCGAGTCAGTAAATATCTGTGCACTGAGTTTACAATCTTGTCTTTCAGAAATATCGACAGTACATGGCAGGACTTCTGGCTCCTCCTTATGGCGTTATGGAAACGGGCTCTAACAATGACAGTAAGTGGAAACTGGGAACATT@GTTCCTTCAGAGAAGATCCTCAGGGCTGGAAAAATTCTACGAAATGCCATTCTCTCTCGAGCACCTCACATGATAAGAGATAGAAAATACCACCTAAAGACATACAGGTATGTGCAATATTCTAAAGGCTACACCCCTGTCAGATCCGTGTTTAGTGAAATTAGAATAAACTTGCATTCCCCTGTTTTCCATTACAGA…
chr13	163247243	163247800	chr13	162990042	163045772	CLUSTER3062	-	-	ENSSSCT00000033589.1:0-557	ENSSSCT00000013072.3:103-1749,ENSSSCT00000034028.1:0-4155,ENSSSCT00000013072.3:0-1749,ENSSSCT00000034028.1:103-4155	ALCAM	ALCAM	Read_Through	-201470	TGTGTCTGGGAAAAGCCGCTGCCCCCAGCGTCCCGACCCGCGAGCTCGCGGGCAGCGCGGGGCCGGGAACGACGCCCCCTCCTGCGGTGCGGAGTCAGTCGGTGCTCCCAGAGAAGGAGGAGGAATATGGCATCGAAGGCGGCCCCCTCCTGCCGTCTGGTCTTCTGCCTCTTGATCTCAGCTGCTGCTCTTCGGCCAGG@AGGTCTCGGATTGTATACTGTAAACTCAGCATATGGAGATAACATTATCATGCCTTGCCGACTCGATGTACCTCAGAATCTCATGTTTGGCAAATGGAAATATGTAAGTGTGACCTACCATGTACTTGGTTAATTGCCTCTAGTTTTTGAAAGAAAATTCCTTCTGTGAATAAATGTGAATTTCAACTTAACATAATG…
chr6	72084474	72119249	chr6	72138792	72140762	CLUSTER866	+	+	ENSSSCT00000032220.1:0-930	ENSSSCT00000032404.1:0-530	MINOS1	ENSSSCT00000032404.1	Read_Through	19542	CTTTCAGAGCTGCTTCCACCCCATAAATTGGAGCTCGGAGAGAGCGTGGCCGTATCTGAGGAAGATGACAACGTCCTGAGGACCCTCACTTGCTCTGGCCGTTCCTGAAAATCCCTATGTTGTTCTCACCGCTGGACCTGGCCGGGCACGTCCCAGCTGTGTCTCTTGCCCTGCGGTTGGGTGGCTGGCTCTCTTGTCAG@ATGCTTCGGGTCCTGCTGGGGGCTGTCCTCCCCGCCGTGCTGCTGGCCGCTCCGCCGCCCATCAACAAGCTGGCCCTGTTCCCGGATAAGAGCGCCTGGTGCGAGGCCAAGAACATCACCCAGATCGTGGGCCACAGCGGCTGTGAGGCCAAGTCCATCCCAGAACAGGTTGGGGTTCCCAAGGGGGGTGGGTGGCAG…
GL894982-1	2990	12269	GL894982-1	14774	42475	CLUSTER879	+	+	ENSSSCT00000028861.1:0-271	ENSSSCT00000028866.1:0-1259	ENSSSCT00000028861.1	ENSSSCT00000028866.1	Read_Through	2504	CTGGATTTGTGAAGGTTTTTGTTTTTATTTCTTCTGGTTATAGGGCTATGCACCACCACCCAAAAATGGGATTGAACAGAAGCGCCCTGGACGCCCTTTGAATATTACATCTTTAGTTAGGTTGTCTTCAGCTGTGCCAAACCAGATTTCCATTTCTTGGGCATCAGAAATTGGAAAGGTAAAGATTCTTTTCCCTGGCT@ATGTCTGTATATCTTGTACGACAGCTCACATCAGCCATGTTATTGCAGAGATTAAAAATGAAAGGTATTAGAAACCCTGATCATTCCAGAGCACTAAGTAAGTAATGTTTGTAAAACTGGACATATGAGATGCTTAAAATGGGAAAAAAAAGCCTCGAATTTAGATCCTTACAGGAACNCAGGAACAATTATTAGAAA…
GL896221-1	4874	11724	GL896221-1	17637	38631	CLUSTER910	+	+	ENSSSCT00000023735.1:0-854	ENSSSCT00000030710.1:171-1478	ENSSSCT00000023735.1	ENSSSCT00000030710.1	Read_Through	2575	tttgattttatggtATTTATTAGTTTTTGCGCCTCTGTTACTCTCTATAGGAAGCAGACAATGATCCAACTGGGGAAGCCGCGGCTAATACCCAGCAGACGCTTACTTTCTATGAGTTAGACCTTGGTTTAAATCATGTGGTCCGAAAATACANNNNNNNNNNNNNNNNNNNNNNNNNNNNNNNNNNNNNNNNNNNNNNN@AATGACCTGGATGACCCCGAAAGAGGAATGATTTTTGTCTGCTCTGCCACCCATAAGACCAAATCGATGTTCTTCTTTTTGGCCCAAACTGAGCAGGGAGATATCTTTAAGATCACTTTGGAGACAGATGAAGATATGGTAAGTAGACCATGGATGGAGGGGAAAAAAGGGAAAAACTCATTTGTTGTGGTTGGTCCA…
chr6	44853497	44876801	chr6	44973257	44978799	CLUSTER498	+	+	ENSSSCT00000025438.1:0-1183	ENSSSCT00000003339.2:538-2294,ENSSSCT00000003339.2:726-2294	ENSSSCT00000025438.1	CYP2B6	Read_Through	53051	GAGGAGATTGACCGCGTGATCGGCAGGAACCGCCAGGCCAAGTTCGAGGACCGGGCCAAGATGCCCTACACGGAGGCCGTGATCCACGAGATCCAGAGATTCGGAGACATGATCCCCATGGGCCTGGCCCGAAGAGTCACCAAGGATACCAAGTTTCGGGACTTCCTCCTCCCCAAGGTGCCTCCCCACCTGACCTGGGA@GGCACAGAAGTCTATCCCATCCTGACCTCTGCTCTCCATGACCCACGTTACTTTGAAAACCCAGAGGCCTTCAACCCTGACCACTTTCTGGATGCCACTGGGGCCCTGAAGAAAAATGACGCTTTTATGCCCTTCTCCATAGGTAAGCTGGACCTGCATTCCAGAGGGCAGGTGCCACCCCCTCCTTGAGACAAGCAA…
chr3	102222586	102248380	chr3	101824341	101831998	CLUSTER2753	-	-	ENSSSCT00000009249.2:0-646	ENSSSCT00000023073.1:95-246	ENSSSCT00000009249.2	ENSSSCT00000023073.1	Read_Through	-389396	AATTAATAAATGTTAATATTCAGAATTGTTAAAATGCTTTATTCCTTTCTAGGCATAATAGTGGATCTTTGAATGTTGAAGATGTTCTTACCAGCTTTGACAATACAGGAAATGTTTGTAAGTTATGTGCTCATTGTATGGAAGTATTTTTAGTGTTTTAAAAGTGAATTTTTAGTTGTTTTTTCCATGATGTTTGACTA@GTTGCTATTTCTGCAGATGTCAAAGAAGTTCTGTTAACTGATGGGAATGAAAAGGCCATCAGAAGTATCCTTATTCAGATAGAAAACGGGTTTGTTGTGCTCATTCCTTTTCCCCGGCTGAGTAACAATTGATATAAAGAAAGACAGCATGGGGTATTAAAAAAGAGTCCCCCCCACACACACATGATAAGTAATTAA…
chr1	108480389	108482263	chr1	108567669	108607803	CLUSTER463	+	+	ENSSSCT00000030202.1:0-321	ENSSSCT00000022523.1:0-539	ENSSSCT00000030202.1	ENSSSCT00000022523.1	Read_Through	85405	TGAGTTTCTTTTTTCTTTTCCTGTAGTCTTCCATACACCAGCAAACTTGTGAAAACCTTATTGTATAACTTTATCAGACAAGAAAAGCCTCCGCCTCCAGGAGCACATGTTCTCCCCCAGCAGTCGGACAGCGGGGGACTGCTGTATGGACTGGCCTCAGGAGTAGCAAGTAAGTCCTATCAAATTTTGTCAGCTCCCTG@TCCAGATAGCAGTCCTTTCCCCTCATCAAATCCACATGCTTTCCAGATTAACTTTAACAGTTTGTACATGGCCCTCTGTGAACAGCAGACATCTGATCAAGCAACCCTCCTTTTGTATACATTGCTGCATCAGAATAGTAATATTAGAACATACATGTTGGCTCGTACAGATATGGAAAATCTTGTGAGTATCACACT…
chr1	7197034	7812492	chr1	8055893	8262314	CLUSTER3208	+	+	ENSSSCT00000004459.2:0-729,ENSSSCT00000004459.2:0-887	ENSSSCT00000026963.1:0-2619,ENSSSCT00000026963.1:83-2619	ENSSSCT00000004459.2	ENSSSCT00000026963.1	Read_Through	229551	CCTTTCCAGCCTTAGAGGAAATGTGTTTCTTTACCTACGCAGGAGCCCCATCCTGGTTTTCCAGTGCAACTGCCGCCACGTGATTTGCCTGGACTGTTTCCACCTGTACTGTGTGACGAGGCTCAATGACCGGCAGTTCGTCCATGACCCGCAGCTTGGCTACTCTCTGCCTTGTGTGGGTAAGTCTCCCACGTGCGCCG@TACAACCGGTACCAGCAATATGGTGCCGAGGAATGCGTGCTACAGATGGGGGGCGTGCTGTGCCCCAGCCCCGGCTGCGGAGCGGGGCTGCTTCCAGAGCCAGGTCAGAGGAAAGTCACCTGTGAAGGGGGCAACAGCCTGGGCTGCGGGGTAAGTGCAGCTGCACCCCTGGGTGTAGACTGTGTTTGTTTGCGTCAG…
chr6	73962558	73972413	chr6	73960119	73960964	CLUSTER1495	-	-	ENSSSCT00000003907.1:0-494,ENSSSCT00000003907.1:0-337,ENSSSCT00000003907.1:0-278	ENSSSCT00000031124.1:52-577,ENSSSCT00000031124.1:0-577,ENSSSCT00000031124.1:181-577	ENSSSCT00000003907.1	ENSSSCT00000031124.1	Read_Through	-1129	GGTATTGTCCTTACCCTGCTGCCCGGCCCACGCCCATTCCTAGGGAGCTAGACAGCTGGGTCTTCGTGGAGCTGGACGTGGGCTCCGAAGGGAACGCCGATGGGGCTCAGATTCAGGAGGTGCTGCACGCTGTCATCTCCAGCGGCTCCATTGCCTCCTACGTCACCTCTCCCCAGGGGTTCCAGTTCCGACGCCTGGGC@TGCCCCAGTTCTCAAGAGTCTGCACTGAGGCCGAGTTCGCCTGCCACCGGTACAATGAGTGTGTGGCCCTGGAGTATCGATGTGACCGGAGGCCTGACTGCAGGGACATGTCTGATGAACTCGATTGTGGTGAGGGGCTGTGTGGGGACACGGCGGCCTCCAGAGGCCAGGGGAGGGCCGGAGTATGCCTGGACCTCC…
chr14	59328087	59328971	chr14	59110062	59116852	CLUSTER605	-	-	ENSSSCT00000011112.2:0-884,ENSSSCT00000011112.2:0-951	ENSSSCT00000011113.2:0-733,ENSSSCT00000011113.2:26-733,ENSSSCT00000011113.2:50-733	ENSSSCT00000011112.2	ENSSSCT00000011113.2	Read_Through	-30945	ACAAGCGGCTCAGCTACCAGAGTGTCTTCCTCTTTCTCTGCCTCTTCTGGGCCTCTCTGAGGACGGTCCTCTTCTCCTTCTACTTCAAAGACTTCGTGGCGGCCAACGCGCTCAGCCCCTTCGTATTCTGGCTGCTCTATTGCTTCCCCGTGTGCCTCCAGTTCTTCACCCTCACGCTGATGAACTTGTATTTCACGCAG@GTTGCCCCTGTATCTGGCCTCACTCTTCATCAGCCTCATTTTCCTCCTGGTGAATTTAACCTGCGCGGTGTTGGTGAAGACAGGAAGCTGGGAGAGGAAGGTCATCGTCTCCGTGCGCGTGGCCATTAACGACACGCTCTTCGTGCTCTGCGCTGTCTCCCTGTCCATCTGTCTCTACAAAATCTCCAAGATGTCCTT…
chr6	79677218	79874910	chr6	79901037	79913208	CLUSTER1277	+	+	ENSSSCT00000003981.2:0-2019,ENSSSCT00000003981.2:0-2205,ENSSSCT00000003981.2:0-2196	ENSSSCT00000028814.1:646-927,ENSSSCT00000028814.1:517-927	EPB41	ENSSSCT00000028814.1	Read_Through	23236	CATCTTTGTCCTTTTAACTGTAGGATTTAGATAAAAGTCAAGAAGAGATCAAAAAACATCATGCCAGCATCAGTGAGCTGAAAAAGAACTTCATGGAATCTGTACCAGAACCACGGCCTAGTGAATGGGATAAACGCTTATCCACTCACTCTCCCTTTCGAACAATTAACATCAATGGGCAAATTCCTACAGGAGAAGGA@CCTCCCCTGGTGAAGACTCAGACCGTCACCCTCTCAGACACTGCTAATGCTGTGAAAAGTGAAATCCCAACCAAAGATGTCCCTATTGTCCACACCGAGACCAAGACCATCACTTATGAGGCTGCCCAGGTAGGACACGGTTTGATGTCTCAGAACCCAAGACTGGAGTAAAGATGAATAACCTTTCTTCACAGGGTT…
chr16	70161813	70186546	chr16	70431379	70548250	CLUSTER1388	+	+	ENSSSCT00000029751.1:0-395,ENSSSCT00000029751.1:0-561,ENSSSCT00000029751.1:0-339,ENSSSCT00000029751.1:0-469	ENSSSCT00000018559.2:120-1253,ENSSSCT00000018559.2:0-1253	ENSSSCT00000029751.1	ENSSSCT00000018559.2	Read_Through	229094	TGCGGTAATTCTAGCATTTGCAACCCAGCAATTTGAACCTTCTGTCTGCCTAAATGATGATTTTACATGGTAACGGTTGTACTAAATCCTCTCGCTTTTGCTCCATAGCCGCTGTTGTGACAAGAAAAGCTGTGGCAACCGAAATGAGACTCCCTCAGATCCAGTGATAATTGACAGGTAGGGACCACTCTACTTTCACT@GTCGTGGTGTCTACAACAGTCAACGTGGATGGCCATGTCCTGGCAGTCTCTGATAACATGTTTGTCCATAATAACTCCAAGCATGGGCGGAGGGCTCGGAGACTTGACCCCTCGGAAGGTACGCCCTCTTATCTGGAACATGGTAGGCGAATCATTTTCATTGGTTGGCATTGCTACTTGCACTGTGTGTTTATTTGG…
chr14	109578356	109588105	chr14	109299787	109374965	CLUSTER1888	-	-	ENSSSCT00000026367.1:0-475	ENSSSCT00000011426.2:193-1853,ENSSSCT00000011426.2:0-1853	ENSSSCT00000026367.1	ENSSSCT00000011426.2	Read_Through	-203390	TCAGACAATGTGTGACCCAGATCAACCTGAGAAATGACAAGTGGGAAGTCTCCAAGGAAACAGGCTCCCCAGAGCAGTTTGATATTGTTGTCCTCACAATGCCAGCTCCTCAGATTCTGCAGCTTCGGGGAGACATTGAAAACTGTGAGTCTCAGCCTGTGCTGTATACCTCAGGGAATGGGCTTTCTTTGATAGAGCAT@TGTCTTTTTTCTTCCACAGTAATTAGTGAATGCCAAAGGCAGCAACTGGAGTCTGTGAGCTACTCCTCTCGCTACGCACTGGGCCTCTTTTATGAAGCTGGCACGAAGATTGATGTCCCTTGGGCTGGGCAGTACATCACTAGTAATCCCTGCATTCGCTTCATCTGCATTGATAATAAGAAACGCAATATAGGTCAG…
chr2	15888943	15894839	chr2	15885303	15887195	CLUSTER1453	-	-	ENSSSCT00000014442.2:0-850,ENSSSCT00000014442.2:0-461	ENSSSCT00000029530.1:344-755,ENSSSCT00000029530.1:0-755	ENSSSCT00000014442.2	ENSSSCT00000029530.1	Read_Through	-1287	CTGGGTCCTTTGAATTTTAAAAAATTACAAAGTATAGGAcctgtcatggcactgcagaagtgaatccaactaagaactatgaggtttcgggtttgatccctggcctcagtggattaaggatccgggttgccataagctgtgggtaggttgcagacatgactcagatccttcgttgctgtggctgtggtgtaggccggagg@TTCTGTTACAGGTACTGAAGCTAGTTTTGTGGTAAATACAGACATGTATACTAAGGAGAAAAATATTTCTGTTTCCAGTAGTAAAAGTGGACCAGTCATAGCCAAGCGAGAAGTTAAAAAGGTCAGTGTTAAAACCTACCTCATATGCTTATTTTCATATCTAAACAACTTTGAATGTTATTCTGGCAGGGGTGTAAA…
JH118921-1	23055	35976	JH118921-1	3357	16992	CLUSTER1608	-	-	ENSSSCT00000027229.1:0-416,ENSSSCT00000027229.1:0-530,ENSSSCT00000027229.1:0-368	ENSSSCT00000028699.1:0-325,ENSSSCT00000028699.1:192-325	ENSSSCT00000027229.1	ENSSSCT00000028699.1	Read_Through	-6062	NNNNNNNNNNNNNNNNNNNNNNNNNNNNNNNNNNNNNNNNNNNNNNNNNNNNNNNNNNNNNNNNNNNNNNNNNNNTTTCTCCGCAGCCTGCCCCgtgcccgtgcctgtgcccgtgcctgCCGGTGCCATCCCGGGAAGCTCCTGCGGCAGCTCTCCATCTNNNNNNNNNNNNNNNNNNNNNNNNNNNNNNNNNNNNNNNN@TAATTTTCTCTTGTTGGTTTCAGTCCCTTGCAGACGCGCAGCACATTCAGGAGAGCGCCTCGTCCCCACCGCCGGGCGCCGCCGGCTTTCTGCACCTGTCCCGAGACTCTGCCAGCTCCAGCAGCAAGAACTCCTCCTGCGACACGGACGACTTTGTGCTGGTTCCGCACAGCGTCTCGTCCGAGCACCCGCGTGAGG…
chr1	96603029	96716538	chr1	96353432	96353641	CLUSTER660	-	-	ENSSSCT00000004932.2:0-962	ENSSSCT00000024006.1:0-209	ENSSSCT00000004932.2	ENSSSCT00000024006.1	Read_Through	-249387	AATCCATTCCCCTGAGTTTATACACTGACTCCATTAAGGGTATCAGCATTCACCTGATTTTTTTCTGTGATCATTCTTCCTCATTTCAGGTTCATGTGATCCGAGAGGTTGCTTCCATGGCTCGGGAGAAGCTTGGAGTGTCCTGTGAGGTCATTGATCTGAGGACTATAATTCCTTGGGATGTAGATACAGTTTGTAAG@aggaaaaaacaaaacaaaaCAAAAAACATCAGTGTTCTTAAAGTTAACCATCTGGATTCTTCTCTGCAGGAAGAATGTTTCCTGAACCTTGAAGCTCCTATATCCAGAGTTTGTGGGTATGACACGCCATTCCCTCACATTTTTGAGCCGTTCTATATCCCAGACAAATGGAAATGCTATGATGCCCTTCGCAAAATG…
chr9	109717446	109719221	chr9	109721268	109733250	CLUSTER711	+	+	ENSSSCT00000025242.1:0-300	ENSSSCT00000023922.1:0-556,ENSSSCT00000023922.1:95-556	ENSSSCT00000025242.1	ENSSSCT00000023922.1	Read_Through	2046	AGTTAAACTTTAAATACACTGCAATATTTAAGCAATCTGAAATGTGTTTACAAAATGATTTCAGAATGACACTGGTGGACTGCGTAGCCTTGTCAACAAGTGGACTACCTTCTTAAAGGCCAGGCTAGTGTGCTCAGTAACTGATGAAGATGGCCCGGAAACACACTTTGACGAATTAGGTACATAAATGTGAGATTGTA@AAAGAATGATATTTACTTTTTATAGAGGATGTGTTCCTGCTGGAAACTGATAATCCAAGGACAACACTAGTGTATGGCATTTTTACAACATCAAGGTAATTATTAAACAATTACATTGTATGAGGTTAAACAATAAACTTTATTGAGTAATAGGTAATTATTTTAAAAACATTCTTTTCAACTCCTTAATTTTACATA…
chr2	95590521	95592984	chr2	95586259	95590123	CLUSTER1380	-	-	ENSSSCT00000024141.1:0-241,ENSSSCT00000024141.1:0-149	ENSSSCT00000024624.1:0-533,ENSSSCT00000024624.1:85-533	ENSSSCT00000024141.1	ENSSSCT00000024624.1	Read_Through	-397	TAATCTCTATTATAAATAATCTTTATAGATTGTCACTTTATTTGGCAAAATAAATGTGAGCACACTAGAAGTTTTTGGAAAAATAATCTCTTCTGTTTCCTCTTTTAGGGGTTAGCAAGCCTGTATGAGAAATGTAATCATGTAAATGCCAAGGATGACTTACCTGGTGTTTACCAAAAGCTCCTGGATCTTTATGAAAG@CATTCTAAGTGTTGACAAACAGAAGTGGTGTGATGTCTGTAAGAAACTTGTGGATCTGTATTACCAAGAAAAGAAACACGTAGAGGTTGGTTAATGATTTGCTGGGGTGGTAGATTTCTTTTAATAAAACCATTATTAGAAGAAAGCTTTCATTTAGCTTAGGGAAAAATTTAAAAATTAATATGTATTATGGTATTA…
chr6	90315473	90318708	chr6	90303817	90308191	CLUSTER659	-	-	ENSSSCT00000031363.1:0-322	ENSSSCT00000030425.1:0-1028	ENSSSCT00000031363.1	ENSSSCT00000030425.1	Read_Through	-7281	TACTGAACATACATTTCTCTTTCAGCCCGCAGTGTCTGTTGGAAATGTTGGTCAGCTTGCAATAGATCTAATTATTTCTACACTGAATATGTGTAAGATCGGTTACTTCTATACTGATTGTCTTGTGCCAATGGTTGGAAACAATCCATATGCAACTGCAGAAGAAAATTCAACAGAACTCAGTATAAATGCTGAAGGTA@ACACAGTATAAATCAAAGTCATTCTGCGAGAAACTGCTCTCCTGGGTGAAAAGCAGTGACCTTGCCAAAGTCGTCGTTCTTTCGAGCAGTCACTCCTATCAGCGCAATGACCTCCAGCTCCGCAGGTATGTTTGGCCTTTGCAAAGTTATTTTTGTTATAACTAATATGATGTTATGGTGATTTCTCTGTGAAAAAGT…
chr1	37112970	37147470	chr1	37339066	37361359	CLUSTER1459	+	+	ENSSSCT00000004646.2:0-1334	ENSSSCT00000004647.2:0-2093	ENSSSCT00000004646.2	ENSSSCT00000004647.2	Read_Through	191595	TTTATGAAGGGACTTTTAATTGGGAAAGTGTCAAGCAGCATGATGCCGCCAGCCTGCTGAAGCTCTTCATCCGGGAGCTGCCGCAGCCACTGCTCAGTGTAGAATACCTCAAAGCCTTTCAGGCTGTCCAGAGTGAGTGCCATCCCTCTTTGAAGCAGTCCTTGTGCCGGTGCCATCCATGTTAATCGTTTTAATGTCAT@TTGTACAACACGCATTTTCAAAAAGTCATTTCTGTTTCAGGCCCTGCTTGAATTTCTCCAAAGAGTCGTCGACAATAGAGAGAAAAATAAGATGACAATCATGAATGTAGCCATGGTCATGGCCCCGAATCTCTTCATGTCCCACACATTGGGTTTGAAGTCCAGTGAGCAGCGAGAATTTGCAATGGCAGCTGGGAT…
chr1	299949433	300126812	chr1	299840472	299882865	CLUSTER36	-	-	ENSSSCT00000029476.1:0-1114	ENSSSCT00000030373.1:0-922	ENSSSCT00000029476.1	ENSSSCT00000030373.1	Read_Through	-66567	CCTCTACCTTTTTTATCTCAGGATCTCACCTCTACCTTCTAGTATTGTGGATTTGATTTTGGTTTTGTTCATCACATGAGTCAATGGTATCTGGAGAGTCAACATGTAATGGTATCTGGAGAGTCAACATGTAATGGTTATTTCCAGAGAGCTGTTGGAGACAACATTTGTGTTGTATTTCATACCTCTGCACCTGGATT@GGTTCAAGGGCAGACGGGGTTTTTGAGGAGGATTCGCAAATTGACATAGCTACAGTACAGGACATGCTGAGCAGCCACCATTACAAGTCATTCAAAGTCAGCATGATCCACAGACTCCGATTCACAACCGACGTGCAGTTAGGTAAGTGTGTAAACAGAGGAGAGCCTTCTGTCCCTGGTCAGTGTAGAAACAGGGAA…
chr11	4679143	4679277	chr11	4705299	4724394	CLUSTER89	+	+	ENSSSCT00000010198.2:0-134	ENSSSCT00000010197.2:101-362,ENSSSCT00000010197.2:0-362	POLR1D	ENSSSCT00000010197.2	Read_Through	24789	ccgtcggtccttccttcctttcttcctGCTGCGCCCGCACGCTTCGCGGTATGGGGCAGAGCCTTCGGCGGGCCGGCACCACCTGAGGATCCCGGAAGCCGCCCCCGCGATGGAAGAGGACCAGGAGCTGGAGAG@CTCAGACTTTTTCCTTTTCCCCCCAGGAAAGCAATAGAAGAACTACTTAAAGAGGCAAAACGTGGAAAGACGAGGGCAGAAACAATGGGACCTATGGGTTGGTAAGTCCTAGAGTCATCTTCCTTAAAACTTAAAGATACATATATTAAAGAGAACACTTGTCGTGGTGTCTTCACGCCTTTGGTCCACAAGTCCCCGGA
chr12	47140305	47140647	chr12	47142025	47143013	CLUSTER1754	+	+	ENSSSCT00000019350.2:0-462,ENSSSCT00000019350.2:0-342	ENSSSCT00000032382.1:0-795,ENSSSCT00000032382.1:348-795	ENSSSCT00000019350.2	ENSSSCT00000032382.1	Read_Through	1162	GCGAACCGGCATCCCCCGGGCGGCGATCCAGGGCGGCTCCGGGCCTGGCCAGGAACCCGGAGGCGCGGCCAGCATGGAGGCGCTGCTGCTGGGCGTGGGGCTGCTGCTGGGCGCCTACGTGCTTGTCTACTACAACCTGGTGAAGGCCCCGCCGTGCCGCGGCATCGCCAGCCTGCGGGGCCGCACGGCCGTGGTCACGG@aacgtaggccggcagctgcagctctaatttgacccctagcctgggaacttccatatgctgcaggtgcagccgtaaaaaaaaaagattcgcatccagtgtccacgcacatatccactacattctaatgCATGGGGCAGATCTTAGTTGTAGGAGCGGTTGGACTCTCAGAATTTGCCGCTTGGGGAGAGGGATGCATAT…
chr13	106088500	106221704	chr13	106386537	106580727	CLUSTER2274	+	+	ENSSSCT00000027533.1:0-675,ENSSSCT00000027533.1:0-835	ENSSSCT00000030951.1:54-252,ENSSSCT00000030951.1:0-252	ENSSSCT00000027533.1	ENSSSCT00000030951.1	Read_Through	142907	TATTTAATGAAATCTTCTTACTGTAGATCTCGGTCAAGACCTCGTCCACGTTCCCATAGTCGAAGCAGTGAAAGGTCCAGTCACAGAAGAACACGTAGTAGGTCTCGGGATAGAGAACGACGGAAAGGCAGAGATAAGGAGAAAAGAGAAAAGGAGAAGGATAAAGGCAAGGACAAGGAATTACACAACATCAAACGTGG@AGCCACCAGCTGAACAGGCCAAAGCAAGACTACAGCTGGTTCTTGAAGCTGCTGGTAAGTGTTAATAATAAACTTTATTTAAATGAAAAAATGTGAAATTAATCTAGCATGCTTATAGATGGGTCAAAGAGCAACACATCTGTATTTTCATATAGCCTCACAAATTTACAAGATTTATGTATGGCCGTATTTTACCTC…
chr13	28176732	28188596	chr13	28153214	28155827	CLUSTER2019	-	-	ENSSSCT00000025591.1:0-337	ENSSSCT00000025497.1:0-307	ENSSSCT00000025591.1	ENSSSCT00000025497.1	Read_Through	-20904	CCTTGGAGTTGACTGCTTTTTTAATTTGCTTCATGTTTTCTCAAAAAATATTTTGATGTCTTCCACAGGATTTTGTCTCCACAATTATCCGTTTACTTGATAGCCCCTCAACTACCATTAGAGCCAAAGCCTTCCTGGTTCTTTTATATATTTTGATTCATAACCATGAGATGCTGCTGCTCAGCTGCCAAGCAAGGTAA@TGTGTAGACTGGTGATGTACATTGAGAGAGACAGCAGAAAGACCACTCCAGGCAAGGAGCAGCAAAGCGGCAGTGCATACCTGTCCAAATGCCTGGACCTTCTCATCCGTCACATCGTGCAGGAGTTGCCGCGAATCCTGGGTAAATTGGAGTCTTGTCCTCAGGCCCCTTGCCGCTTACCTTTCTGTGACTTGGCTT…
chr17	31588819	31830851	chr17	32441694	32456736	CLUSTER608	+	+	ENSSSCT00000023356.1:0-937,ENSSSCT00000023356.1:0-674	ENSSSCT00000031916.1:0-1535,ENSSSCT00000031916.1:236-1535,ENSSSCT00000031916.1:163-1535	ENSSSCT00000023356.1	ENSSSCT00000031916.1	Read_Through	610842	CTCGGGCTATGACAGCCTCTCCAACAGGCTCAGTGTCCTGGACCGGCTCCTCCACACCCACCCCATCTGGCTGCAGCTGAGCCTGAGCGAGGAGGAGGCTGCTGCAGTCCTGCAGTCACAGCCTCCGGGGGTAAGACTCAGAGATGAGCAAACATGTTAAGGCAGGCCAGGCTGTTGCTTCCTTAAAGAGAAAGACGCGG@TCCCAGCCTTCTAGATATTTCCTGACTTTGAATTTCTTTTCCCTCCTATAGATTTTCCTGGTCCGTAAATCCACCAAAATGCAAAAGAAAGTCCTCTCCCTTCGCCTGCCCTGTGAATTTGGAGCCCCGCTCAAGGAATTTGCCATAAAGGAAAGCACATACAGTAAGTGAGCTTCGGGTGGTTAGGTCCTGGTGAAG…
chr6	31815666	31827169	chr6	31799736	31809745	CLUSTER142	-	-	ENSSSCT00000031189.1:0-832	ENSSSCT00000027699.1:0-1485	ENSSSCT00000031189.1	ENSSSCT00000027699.1	Read_Through	-5920	GCAGTTGGTCGAAATGTTGGATATGTCTGTCCCTGCGGTTGCTAAATTGAGGCGGCTTTTAGATAGTCTGCCAAGGGAGGCTTTACCAGATATCCTGACATCAATTATCCGAACAAGCAACAAAGAGAAGCTCCAGGTACGTTGTTCCCCTCTGGAATGCCACATGGCTTTGTCACTTCTTTtttttttttttgtctttt@ATGCTAGAGAAGAAAATACGCACATCCAATATGCCAGAGCAGGCCCACAAAGTCTGTGTCAAAGAGATAAAAAGGTACGTTGTGGAAGCTGTTCATTCATTAGTTTTTTTCGTTTTGCTTATTAATGTTCATAGTTCTTGCTCGTGGAAACAAATCTGCTACGTTGCATTACGAAGCTGAGTCATTTGTCTTAGAGTC…
chr2	50877873	50901088	chr2	50763079	50825361	CLUSTER1835	-	-	ENSSSCT00000029294.1:0-510	ENSSSCT00000014642.2:0-6511	ENSSSCT00000029294.1	ENSSSCT00000014642.2	Read_Through	-52511	TACAGGAACTATGTAGAGTCATGTTTGATGCTTTGGAACAGAAGTGGAAGCAAACAGAACAGGTAATTTATTTCTCAGGTTGAGGGGAATGTTTTCAAACAATGTACTCATTACCTTAAAGTGACTTTATTCTATTGGAATGTTTTAAAACTTGGCATtggtacagttgttacaatactgaatgggaaattgaaagtact@NNNNNNNNNNNNNNNNNNNNNNNNNNNNNNNNNNNNGATCTTATAAATGAACTGTATCAAGGCAAGCTGAAGGACTACGTGAGATGTCTGGAATGTGGTTATGAGGGCTGGAGAATCGACACATATCTTGATATTCCATTGGTCATCCGACCTTATGGGTCCAGCCAAGCATTTGCTAGTGTGGTGTGTACCTTTCAG…
chr15	154761680	154783239	chr15	154744783	154758361	CLUSTER2513	-	-	ENSSSCT00000017824.2:0-394	ENSSSCT00000017823.2:95-576,ENSSSCT00000017823.2:0-576	ENSSSCT00000017824.2	ENSSSCT00000017823.2	Read_Through	-1848	GGGGTTCGACGGGAGGCTGAAACCGTCCTGCCTCAGTCCCTCTACCTTAATTATAAATAGTTCTGTGTTTTGTAATGTACTTATTAAACAATGAAGCGAATTATGGATTTGATATCTTTTCTTAAATCCTCAGTAGGTTGGGCTTGAACCCGTGAAGCCTATCGTTAGGCACGCACGAAGTAAGTCCTTTTTTACTCTTT@GTACCTGTTCGCCCTGCAGCTTAAGCGAGACCTGCTGGAGGAGCGGCTGACCTGCACGGACGCCACGGCGGCCCTGCTCGCGTCCCACCTCCTGCAGTGTGAGTGCCCACGGGAGGCTGTGTCCGCGGCTTTTCTGTGAGCTTGACCTTGTCTCAGAACAGAAAGGGTGTTGGTTTAGGTCGTTGGGCTTTCACGATC…
