# Supplementary material for: Characterization of a Read-through Fusion Transcript, BCL2L2-PABPN1, Involved in Porcine Adipogenesis
Source: Genes (Basel). 2022 Feb 28;13(3):445. doi: 10.3390/genes13030445 (PMC8955228; doi:10.3390/genes13030445)
Supplement: Supplementary file 1 [file genes-13-00445-s001.zip › Table S3.xlsx]

## Sheet: Table S3-1
Table S3-1 Differentially expressed mRNAs in response to BP treatment
GeneID	GeneName	Log2FoldChange	pvalue	padjust	Regulate
Upregulated
ENSSSCG00000036603	CLN3	1.04118323109337	1.58560902677223e-05	5.12370462324017e-05	UP
ENSSSCG00000011627	ACP3	1.83028997567415	0.00483128892457305	0.0102598860677434	UP
ENSSSCG00000015353	SCIN	1.98195404531394	0.00280944491739568	0.00625339246863901	UP
ENSSSCG00000003142	IZUMO1	1.02414010531716	2.54876283983508e-07	1.03934531178675e-06	UP
ENSSSCG00000007391	MATN4	2.92417317521634	5.73618793374975e-24	1.09560321730092e-22	UP
ENSSSCG00000016158	LANCL1	1.86689144389554	5.36543462181848e-27	1.29519334800111e-25	UP
ENSSSCG00000034993	NREP	1.93350844663687	8.50657461685736e-20	1.17372136106912e-18	UP
ENSSSCG00000016156	ACADL	1.18919129105612	3.21307705832144e-11	2.0242064801052e-10	UP
ENSSSCG00000002385	TGFB3	1.78733621388594	1.88263127353603e-15	1.76978554195029e-14	UP
ENSSSCG00000013742	NFIX	2.29918739743488	1.42472738410939e-100	7.82051444538306e-98	UP
ENSSSCG00000013746	CALR	1.02193499603893	1.39474681462927e-31	4.63386277228804e-30	UP
ENSSSCG00000008841	PDGFRA	1.34468655862118	2.02886760393434e-30	6.14255479608418e-29	UP
ENSSSCG00000027684	TRIM63	1.63033032741381	0.000340686461264771	0.000890879571969289	UP
ENSSSCG00000023918	SLC9C1	1.57327672509571	0.0174619871979821	0.0328942984742649	UP
ENSSSCG00000006717	PHGDH	3.15458636690152	3.556240857624e-127	3.2069672019645e-124	UP
ENSSSCG00000014800	RNF121	1.03519287596825	0.0119081254542491	0.0233013149193886	UP
ENSSSCG00000039480	ERLIN2	2.21524463664367	5.04277088431054e-43	3.59689166183167e-41	UP
ENSSSCG00000039719	ZDHHC4	1.44021277853469	8.75751901065352e-12	5.81914092155267e-11	UP
ENSSSCG00000039715	FAHD1	1.21172347234896	0.000177366003692681	0.000488704887957246	UP
ENSSSCG00000021181	DHCR7	1.20510845539485	9.1262571030626e-06	3.04812158534829e-05	UP
ENSSSCG00000006664	MTMR11	2.25214534872225	6.21722484999498e-06	2.13063148021679e-05	UP
ENSSSCG00000039372	EMC10	1.17146049001988	1.71355625143144e-18	2.1356019421838e-17	UP
ENSSSCG00000016553	COPG2	1.36375356276786	2.95897869358013e-25	6.30097624820388e-24	UP
ENSSSCG00000016557	CPA1	1.96972397856752	0.00168395448874516	0.00389875764173991	UP
ENSSSCG00000016554	MEST	1.48732283593957	1.98312609424586e-05	6.32566117732542e-05	UP
ENSSSCG00000024823	RCN3	1.66291734154503	5.14298155833402e-38	2.68306372619698e-36	UP
ENSSSCG00000040162	NUPR1	2.93258144147039	3.88394490948e-100	2.04311685342438e-97	UP
ENSSSCG00000029066	IDI1	1.09234993003145	3.49705401685249e-14	2.92773918851212e-13	UP
ENSSSCG00000004041	SLC22A1	1.87142574054127	0.00248767503044538	0.0055829747936097	UP
ENSSSCG00000029662	RASSF4	1.80086274939508	2.47972589479524e-43	1.82014764080174e-41	UP
ENSSSCG00000038993	HOXC4	1.52627163100627	5.85097868250287e-06	2.01441521316059e-05	UP
ENSSSCG00000040095	GPR35	1.24155251476538	5.96498602389805e-12	4.0466388259921e-11	UP
ENSSSCG00000014979	CEP126	1.26645743487164	0.00196867388618975	0.00451407697296505	UP
ENSSSCG00000034045	ERGIC3	1.0259884768481	8.19393045858363e-13	6.03549428469185e-12	UP
ENSSSCG00000016331	RAMP1	1.05589131821593	0.0020467698063282	0.00467531550658469	UP
ENSSSCG00000001498	BEND6	1.08164045846493	9.4197899008231e-10	5.07142206814037e-09	UP
ENSSSCG00000039024	SPSB3	1.6770414474376	6.37646202609866e-20	8.89534067176746e-19	UP
ENSSSCG00000008621	NBAS	1.11646408599278	4.34401337986472e-18	5.22315894483734e-17	UP
ENSSSCG00000032917	USP30	1.15863192256591	6.05078544177346e-13	4.51217756659126e-12	UP
ENSSSCG00000024134	MGLL	1.32859349323412	4.270639393299e-05	0.000129982696095467	UP
ENSSSCG00000021457	ZBTB8A	1.08286974873317	0.000265009849060652	0.000707047621384348	UP
ENSSSCG00000006282	KIFAP3	1.19907678799048	7.86193429977403e-27	1.87631229744134e-25	UP
ENSSSCG00000016420	INSIG1	1.00974041153784	7.37889847361805e-11	4.46803804457688e-10	UP
ENSSSCG00000000839	ALDH1L2	1.95951132371295	3.8120798499579e-97	1.78250030021179e-94	UP
ENSSSCG00000010644	DCLRE1A	1.08952357674208	0.000110307334598502	0.000314363453567965	UP
ENSSSCG00000017448	KRT14	2.43781555301905	0.000166811829079859	0.00046204640926171	UP
ENSSSCG00000031176	GP9	2.009220270304	1.67461338958738e-09	8.73997273399782e-09	UP
ENSSSCG00000028135	PRTFDC1	1.20920737879709	4.92140187226712e-19	6.41866721460459e-18	UP
ENSSSCG00000034450	ABHD10	1.24126937721829	3.98614607553285e-06	1.40103268940986e-05	UP
ENSSSCG00000027114	SCP2	1.64650130019079	1.87805649674016e-29	5.30435419940593e-28	UP
ENSSSCG00000026465	BABAM2	1.6544936590087	9.75494023210375e-23	1.68707014288096e-21	UP
ENSSSCG00000000720	AKAP3	2.17938923652906	3.00669174891091e-16	3.07364237489881e-15	UP
ENSSSCG00000017068	FAXDC2	2.14342774575976	8.80323412799584e-06	2.94412796995887e-05	UP
ENSSSCG00000026868	LRRC15	1.72662039360941	3.14453064395306e-05	9.78789432443475e-05	UP
ENSSSCG00000009004	SFRP2	2.20331767875897	9.25891315908414e-50	9.27728401852677e-48	UP
ENSSSCG00000026861	NECTIN4	2.05734110283991	1.18024780346846e-05	3.87532601268904e-05	UP
ENSSSCG00000005616	TTC16	1.56405843891428	0.0229709711858795	0.041836196079303	UP
ENSSSCG00000005399	RNF20	1.18194286940243	4.65774798548004e-10	2.5950603846728e-09	UP
ENSSSCG00000026886	DCHS2	1.82433187752108	5.00890090400543e-24	9.58142028985887e-23	UP
ENSSSCG00000010461	ANKRD1	1.17510199655333	0.00010347696071487	0.000296369471194474	UP
ENSSSCG00000010464	PPP1R3C	1.29952376070715	1.12813357095366e-11	7.3949565593406e-11	UP
ENSSSCG00000005665	PHYHD1	1.17097132509228	3.72938593061578e-05	0.00011466998873362	UP
ENSSSCG00000008443	EPAS1	1.08948464608159	1.20687335711704e-30	3.74367963970579e-29	UP
ENSSSCG00000008311	CYP26B1	1.05522209357383	2.2361370468108e-09	1.15276562743922e-08	UP
ENSSSCG00000029877	MKRN2	1.28459241448754	3.18402111232069e-12	2.22089870403584e-11	UP
ENSSSCG00000017668	VMP1	1.13355633331769	4.52504400876123e-36	2.11587705965224e-34	UP
ENSSSCG00000008140	SLC5A7	2.7855855563864	4.31197490909392e-36	2.02374287090374e-34	UP
ENSSSCG00000026084	SLC49A3	1.02353899708874	3.13732508402815e-11	1.9774702539119e-10	UP
ENSSSCG00000014899	PRCP	1.12634701192394	0.000130018088015387	0.000366892794187362	UP
ENSSSCG00000015766	WDR17	1.29249373602302	0.0214719960306179	0.039401736902115	UP
ENSSSCG00000011195	GALNT15	2.4705689295372	9.50264123047175e-15	8.36033766792375e-14	UP
ENSSSCG00000011192	HACL1	1.45540446914214	4.55798502612055e-10	2.5428440545635e-09	UP
ENSSSCG00000032452	WFS1	1.64471757224446	1.00856147097721e-51	1.13688290813279e-49	UP
ENSSSCG00000003719	KCTD1	1.04536302946271	1.3533572538107e-06	5.0461120287537e-06	UP
ENSSSCG00000011423	GRM2	1.92737810347601	6.03836566592966e-09	2.95138856106705e-08	UP
ENSSSCG00000023396	LIX1	2.07833961132891	0.00232600488965032	0.00525421573301759	UP
ENSSSCG00000038745	SERPINF2	1.58916058375747	0.0155228601104943	0.02955453308626	UP
ENSSSCG00000029129	RWDD2A	1.38210523738266	2.43142127816169e-06	8.79309471119773e-06	UP
ENSSSCG00000009818	IFT81	1.13679254967	0.000234319764004584	0.000631168555698287	UP
ENSSSCG00000035653	PGAP2	1.21577836966446	9.38348555518057e-19	1.19542386613678e-17	UP
ENSSSCG00000015507	TNN	1.02973040181679	0.000731776670160093	0.00181328370181966	UP
ENSSSCG00000035657	DIP2A	1.2276907505162	6.86927892513059e-09	3.33556332422207e-08	UP
ENSSSCG00000023743	CLDN6	1.58600208079329	3.34206009204559e-07	1.34117955060634e-06	UP
ENSSSCG00000036963	LRRC25	1.42426499808556	0.00899497777424656	0.0180600499999782	UP
ENSSSCG00000022987	TMEM132E	1.20876767171532	0.00108103271759112	0.00258932387148219	UP
ENSSSCG00000038768	GPR37L1	1.60113996240915	0.0168048466046212	0.0317749271204647	UP
ENSSSCG00000013597	RPS28	1.04958386275564	5.5602561683202e-17	6.06202367228347e-16	UP
ENSSSCG00000006354	TOMM40L	1.1104636656799	5.80010540514479e-07	2.26076970484572e-06	UP
ENSSSCG00000015234	KIRREL3	2.85439346313609	9.77733999645314e-10	5.24825329316415e-09	UP
ENSSSCG00000015346	ICA1	1.5682682413776	0.00017692226698734	0.000487588653288619	UP
ENSSSCG00000038969	DMPK	3.14908682825002	9.39649790703914e-11	5.62497800267279e-10	UP
ENSSSCG00000015340	ASNS	1.38998107760668	3.27349554211248e-35	1.42509935238517e-33	UP
ENSSSCG00000013916	COMP	1.50403488483242	6.25215126131388e-08	2.72748478486827e-07	UP
ENSSSCG00000038350	KISS1	2.55482481160455	4.82976924544114e-05	0.000145758681671599	UP
ENSSSCG00000006911	TGFBR3	1.31838724113262	4.47856148404851e-21	6.83698170932436e-20	UP
ENSSSCG00000037579	PPBP	1.41481138035886	0.0011011699929094	0.00263400363025412	UP
ENSSSCG00000039340	CCDC184	1.45157748004775	0.00616886471862669	0.0128011040553356	UP
ENSSSCG00000012350	MAGEH1	2.22807416237223	8.59467754495707e-17	9.24257274319276e-16	UP
ENSSSCG00000012352	KLF8	1.2027887531879	0.0145778441663025	0.0279237266878424	UP
ENSSSCG00000037575	FKBP14	1.98160246694129	3.89093437113776e-45	3.16922880229769e-43	UP
ENSSSCG00000046879	ZNF391	2.2199698477596	1.75116099926918e-08	8.12211888896891e-08	UP
ENSSSCG00000032144	ZNF140	1.48029340622864	1.82188857399846e-08	8.43466932406696e-08	UP
ENSSSCG00000032141	DUT	1.47213543056842	9.07928148492256e-28	2.30172547685035e-26	UP
ENSSSCG00000039966	NXPH4	2.16884824437838	2.16869103344231e-06	7.88813722189833e-06	UP
ENSSSCG00000007652	PPP1R35	1.10251482402676	2.85612586979667e-05	8.92760314587348e-05	UP
ENSSSCG00000006873	FRRS1	1.4939274003881	1.03231303939295e-06	3.90325011151122e-06	UP
ENSSSCG00000006702	FMO5	1.58378900543539	0.000167249006290337	0.000463153916300834	UP
ENSSSCG00000020823	BSCL2	1.07139035702675	1.2353315260007e-12	8.96325316997635e-12	UP
ENSSSCG00000031154	ACKR2	2.05046470682799	0.00225760248663502	0.00511250787332146	UP
ENSSSCG00000013175	BTBD18	1.51188767052725	0.00423875728448708	0.00909797870055243	UP
ENSSSCG00000038149	KCNE4	1.28947568286352	0.000225018553217104	0.000608060623794079	UP
ENSSSCG00000031487	LSP1	2.28823753199413	4.90560571852505e-10	2.72473700819968e-09	UP
ENSSSCG00000011555	RPUSD3	1.14042763136469	5.20808429140926e-07	2.04008886686447e-06	UP
ENSSSCG00000038543	CENPA	1.5675012781795	5.43500354743063e-06	1.88146201772174e-05	UP
ENSSSCG00000039873	DCXR	1.21311749372145	1.70613560506351e-05	5.48649057919685e-05	UP
ENSSSCG00000012607	TMEM255A	1.89221398277876	2.09692933704865e-27	5.20112630260101e-26	UP
ENSSSCG00000016522	PTN	1.94288352126429	1.56055064683404e-11	1.00571474815109e-10	UP
ENSSSCG00000012970	CTSW	1.65485278303488	0.00134870250005567	0.00317437901998562	UP
ENSSSCG00000013001	MRPL49	1.03444448528258	2.48036100150526e-05	7.79939169215541e-05	UP
ENSSSCG00000035818	FHIT	1.56637218051954	0.0150876975314863	0.0288259959647418	UP
ENSSSCG00000040007	PIGV	1.59996137188442	2.67294054750678e-08	1.21431717928295e-07	UP
ENSSSCG00000002023	PABPN1	6.14617312138556	0	0	UP
ENSSSCG00000008701	LRPAP1	1.04561007379398	1.77922748492988e-16	1.85183404758778e-15	UP
ENSSSCG00000023090	BEST1	1.67257808385272	0.0125347506052331	0.0243575844837722	UP
ENSSSCG00000002025	SLC22A17	1.44350414555819	7.07518792939754e-08	3.07167288888047e-07	UP
ENSSSCG00000037682	HFE	1.73233625659879	7.14015026165704e-15	6.33521023742733e-14	UP
ENSSSCG00000001411	APOM	1.69102435349295	0.00331858046465078	0.0072801178742339	UP
ENSSSCG00000016639	FOXP2	1.28031516579289	0.00217129024301675	0.00493540779785961	UP
ENSSSCG00000021208	SELENOP	1.98467712842945	1.84003184659191e-23	3.40621731132301e-22	UP
ENSSSCG00000016634	CAV1	1.61080246821525	1.0363056547993e-41	6.7439994287841e-40	UP
ENSSSCG00000001485	MLIP	1.50837499242588	0.0167210663068194	0.0316307255204667	UP
ENSSSCG00000031557	CHCHD6	1.59008809809571	2.582985023505e-13	2.0043833812812e-12	UP
ENSSSCG00000011030	CUBN	1.0241199767077	9.44669570644762e-12	6.24421640282206e-11	UP
ENSSSCG00000033727	GPX1	2.44329026654262	8.80271006456055e-40	5.0515552075035e-38	UP
ENSSSCG00000035254	DPH6	1.29118253778588	1.79923165375383e-07	7.47951914015217e-07	UP
ENSSSCG00000002620	EFHC1	1.6411496705788	1.16759806403614e-11	7.64174471666994e-11	UP
ENSSSCG00000002622	TMEM14A	1.72956973055733	1.25611784535975e-07	5.29498757851983e-07	UP
ENSSSCG00000015098	CXCR5	3.53090498015042	1.83817565140354e-06	6.76390778168746e-06	UP
ENSSSCG00000000449	DTX3	1.25799935964042	4.5169360814095e-05	0.000136885064877088	UP
ENSSSCG00000037680	U1	1.47445187288455	0.0271025561149199	0.0484952030957023	UP
ENSSSCG00000017583	SGCA	3.66833481955141	9.49721301386281e-50	9.44112711023763e-48	UP
ENSSSCG00000000443	GLI1	2.36959438122093	8.35309183700185e-06	2.80100357084059e-05	UP
ENSSSCG00000017923	ALOX15	1.16601068589486	7.18552048817516e-06	2.43209641188234e-05	UP
ENSSSCG00000017929	RNASEK	1.0381666774332	2.50822373024533e-12	1.76610845478792e-11	UP
ENSSSCG00000016453	TCAF1	1.32474212574666	3.96559908455321e-16	4.00525507539874e-15	UP
ENSSSCG00000016983	STC2	2.11001593247856	1.16484805655308e-44	9.24918661256767e-43	UP
ENSSSCG00000000846	HCFC2	1.14253300402484	8.96890758633247e-14	7.27715027490022e-13	UP
ENSSSCG00000000841	APPL2	1.00834790616579	1.69555006815734e-07	7.07413073710721e-07	UP
ENSSSCG00000000848	GLT8D2	1.90346721421483	4.17864231508571e-40	2.45373763850963e-38	UP
ENSSSCG00000005016	L2HGDH	1.50830153991243	7.2070675993157e-14	5.90455732909544e-13	UP
ENSSSCG00000034441	MRGPRF	3.25812497009477	1.86251686384261e-32	6.66126782040026e-31	UP
ENSSSCG00000032637	EVC	1.003356568765	2.86215540542713e-11	1.80944977433738e-10	UP
ENSSSCG00000028124	SNRPN	1.74598635660437	1.50887935706622e-31	4.99989550733885e-30	UP
ENSSSCG00000000664	A2ML1	2.0154241816716	1.32035268860771e-05	4.31180876711649e-05	UP
ENSSSCG00000000665	RIMKLB	2.25948694645173	2.49144177281798e-34	1.00493458088904e-32	UP
ENSSSCG00000010076	ZNF70	2.18220317089012	6.0610641038519e-05	0.000179879958418266	UP
ENSSSCG00000008529	YPEL5	1.11102659269713	2.77619980050842e-10	1.58595124350311e-09	UP
ENSSSCG00000023028	JAM2	1.94381614257125	1.03819130901074e-05	3.43839592766541e-05	UP
ENSSSCG00000026898	FAM149B1	1.28781850232764	3.5461097980226e-07	1.41945580849827e-06	UP
ENSSSCG00000010179	ARV1	1.10265798939701	7.70097139305804e-06	2.59612186481596e-05	UP
ENSSSCG00000037869	NDUFA5	1.0197311540925	3.01764679671718e-10	1.71611670308804e-09	UP
ENSSSCG00000014173	LNPEP	1.35075777317813	3.83198859522295e-13	2.92668601764653e-12	UP
ENSSSCG00000014171	ERAP1	1.79710777127018	1.08410713010162e-14	9.47187025434806e-14	UP
ENSSSCG00000014170	CAST	1.52462483280769	6.52957767488248e-53	8.1619720936031e-51	UP
ENSSSCG00000010292	P4HA1	1.21338238945501	6.66238667639433e-22	1.0742353996102e-20	UP
ENSSSCG00000029860	EPB41L4A	1.28518796481518	4.09945893994855e-09	2.05624430341082e-08	UP
ENSSSCG00000032708	Metazoa_SRP	1.09050634787724	3.18221060645092e-14	2.67123729431136e-13	UP
ENSSSCG00000001946	MBIP	1.31170507210661	1.97772476793686e-09	1.02541171232866e-08	UP
ENSSSCG00000010853	EPHX1	1.83828944661936	4.72922373682463e-16	4.74237090368634e-15	UP
ENSSSCG00000011501	SUCLG2	1.10040162077089	2.19781934942446e-23	4.04482059569735e-22	UP
ENSSSCG00000011215	OXSM	1.65022934425847	1.24764441535186e-12	9.04739273050958e-12	UP
ENSSSCG00000036352	RAB7B	1.53827437030924	2.75201949345896e-15	2.54350264311269e-14	UP
ENSSSCG00000005723	NTNG2	1.60369960257669	1.09882478679118e-22	1.88743713377396e-21	UP
ENSSSCG00000014356	DNAJC18	1.31248001743463	2.56453764497482e-18	3.16184450857492e-17	UP
ENSSSCG00000004632	GLDN	1.48899470660771	0.000197501815535341	0.000539943789764765	UP
ENSSSCG00000038550	SCOC	1.02397382084629	2.85725549996387e-10	1.62857113711259e-09	UP
ENSSSCG00000024233	RAB39B	1.64818088658363	0.000953281167430167	0.00230735712016983	UP
ENSSSCG00000010922	ELF3	1.69430168523901	0.0080494017141991	0.0163277147560674	UP
ENSSSCG00000040937	ACCSL	1.30146748709052	1.12288440895976e-09	5.97404789849009e-09	UP
ENSSSCG00000005904	VPS28	1.26562023161229	1.06599466062986e-18	1.3498678626331e-17	UP
ENSSSCG00000036136	BHLHE40	1.2024597410346	0.00517287042899121	0.0109155088026097	UP
ENSSSCG00000036135	COL1A1	1.22533696906977	3.60968269527017e-25	7.58273611111247e-24	UP
ENSSSCG00000040160	MMP24	1.01227846219229	0.0237772757762198	0.0431676886216243	UP
ENSSSCG00000011787	MAGEF1	1.66087623250921	1.05108186663625e-16	1.11793669471631e-15	UP
ENSSSCG00000009931	MVK	1.42699312258021	1.27997221990438e-05	4.18752248673044e-05	UP
ENSSSCG00000009932	MMAB	1.03079655376849	0.000603942710210962	0.00151586018218954	UP
ENSSSCG00000004834	NDN	1.11418509392892	1.57799983641458e-13	1.24826114879286e-12	UP
ENSSSCG00000009807	RHOF	2.68142426890182	2.06503175705954e-18	2.5610045120704e-17	UP
ENSSSCG00000008281	RTKN	1.08906983949796	1.5430944309544e-07	6.45940556724116e-07	UP
ENSSSCG00000046466	NAGLU	1.6207169266486	9.44245693687662e-14	7.63194742817333e-13	UP
ENSSSCG00000025751	MDH1	1.06996317040229	1.02256773264364e-18	1.29747915825386e-17	UP
ENSSSCG00000012294	PLP2	1.62791032261215	1.99586681879832e-24	3.96192116152968e-23	UP
ENSSSCG00000004012	THBS2	1.39775653885332	1.76556545816701e-25	3.79086120907458e-24	UP
ENSSSCG00000012290	WDR45	1.14913748854109	2.39865663211505e-21	3.73403698895839e-20	UP
ENSSSCG00000015405	CD36	1.14409160721326	4.89241982030212e-19	6.3874664148205e-18	UP
ENSSSCG00000003368	RNF207	1.69758373465627	0.000759287337719207	0.00187593006628278	UP
ENSSSCG00000023371	EHD2	2.72804753612817	2.31431881119839e-143	2.92182749913796e-140	UP
ENSSSCG00000023377	EMP3	1.5945325624268	4.03393458786343e-36	1.90743161692044e-34	UP
ENSSSCG00000013901	IFI30	1.41422650815903	1.39317241777688e-15	1.32845934852214e-14	UP
ENSSSCG00000022575	PRMT2	1.09291563035071	4.76716971698582e-09	2.37231051150753e-08	UP
ENSSSCG00000013905	FKBP8	1.20184366793241	1.78235343539851e-19	2.40408249165665e-18	UP
ENSSSCG00000028807	SNORA16A	1.23386916849915	2.18464895256189e-06	7.94389200060308e-06	UP
ENSSSCG00000003183	RRAS	1.3405183884043	1.75854174266971e-19	2.3770438438121e-18	UP
ENSSSCG00000003187	FCGRT	1.06797603291013	3.61687500275893e-20	5.11344310300465e-19	UP
ENSSSCG00000023329	APC2	1.28319015286908	3.63696908847204e-07	1.45327709006672e-06	UP
ENSSSCG00000032151	CPZ	1.3796652088675	1.1018094464915e-09	5.86934357044522e-09	UP
ENSSSCG00000022236	FOLR1	1.17640526565375	1.46930067247443e-05	4.77721374967544e-05	UP
ENSSSCG00000000732	CRACR2A	1.61545998348862	1.76101565065703e-05	5.65001844715249e-05	UP
ENSSSCG00000003980	EXO5	1.36716586703478	2.29942488256826e-11	1.46027359871349e-10	UP
ENSSSCG00000010444	LIPM	1.50504443542007	0.0200034840399548	0.0371006296466034	UP
ENSSSCG00000007462	KCNB1	2.78451178793189	2.58129316455789e-09	1.32152579896769e-08	UP
ENSSSCG00000038806	AXL	1.64096570911956	1.40953366753054e-69	3.55907251051461e-67	UP
ENSSSCG00000038420	PERP	1.76843107222906	3.1476706231782e-05	9.79525304846555e-05	UP
ENSSSCG00000003198	FUZ	1.17256219033627	0.0233562457737543	0.0424766065822022	UP
ENSSSCG00000010522	ANKRD2	1.70289633677627	0.0107181738618922	0.0211728291838798	UP
ENSSSCG00000038558	GOLPH3L	1.55650146501945	7.80167176202159e-28	1.98982032314187e-26	UP
ENSSSCG00000016535	CALD1	1.1486819702667	5.43333508450406e-40	3.17573404823444e-38	UP
ENSSSCG00000010523	HOGA1	1.05108120303422	0.0191867994352391	0.0357303908401677	UP
ENSSSCG00000024809	CLCN4	1.14849501109302	9.43380441888066e-05	0.000271611814796735	UP
ENSSSCG00000025531	SSPN	1.15765631823429	1.46500940319311e-07	6.14680748265638e-07	UP
ENSSSCG00000012151	NHS	1.01943745275496	7.00744619320638e-07	2.70215793820087e-06	UP
ENSSSCG00000017264	AMZ2	1.31026854459989	4.27678978999745e-11	2.65459543258199e-10	UP
ENSSSCG00000013017	EHD1	1.36226471349809	2.471839521457e-32	8.71703183195379e-31	UP
ENSSSCG00000013018	CDC42BPG	1.91501669624954	2.57238832065682e-12	1.80625153216309e-11	UP
ENSSSCG00000035392	IGFBP2	1.71922571058286	2.3637889612692e-16	2.4381401663418e-15	UP
ENSSSCG00000035393	SAAL1	1.15489049630282	7.98174501256579e-06	2.68360934177478e-05	UP
ENSSSCG00000007517	NPEPL1	1.38837359507476	0.00226734720052404	0.00513089413992042	UP
ENSSSCG00000043301	IFN-ALPHA-8	2.61576316455742	0.000283195999584941	0.00074970633146569	UP
ENSSSCG00000023933	CRACR2B	2.52020604925895	8.42874381997169e-08	3.64178270797887e-07	UP
ENSSSCG00000021216	TCEANC2	1.26467679386771	0.00321040186638418	0.00706489865140323	UP
ENSSSCG00000021232	SYNC	1.36864999720447	3.18620689869521e-12	2.22119614003462e-11	UP
ENSSSCG00000008604	WDR35	1.08331491683341	6.80869255551742e-10	3.72442562883048e-09	UP
ENSSSCG00000017919	MED11	2.19409422115922	1.08113311372307e-20	1.60580065420633e-19	UP
ENSSSCG00000000523	BBS10	2.26196302658298	4.67382078756977e-15	4.22989157297981e-14	UP
ENSSSCG00000017914	GLTPD2	1.45571563256849	0.0216837557280339	0.0397268054079854	UP
ENSSSCG00000017665	DHX40	1.62093623023609	5.85148542327473e-20	8.22661508561731e-19	UP
ENSSSCG00000000857	IGF1	1.88147449851207	8.11267835222674e-10	4.39770563318431e-09	UP
ENSSSCG00000034816	METTL4	1.06243657826024	0.00729517068333002	0.0149142661734197	UP
ENSSSCG00000008516	DPY30	1.1397411137837	1.24562858163123e-10	7.36583646046569e-10	UP
ENSSSCG00000023693	PROC	1.45541648329634	0.0105381472476206	0.0208565776769415	UP
ENSSSCG00000000948	SYT1	1.95979895700079	0.00123779680496414	0.00293303015440546	UP
ENSSSCG00000017204	ITGB4	1.83947610430807	1.65805270653584e-08	7.71293862196574e-08	UP
ENSSSCG00000017488	CSF3	1.76476043394698	0.000155469158404025	0.000432715635990038	UP
ENSSSCG00000027466	PCOLCE	1.54017381360765	3.88050552727687e-25	8.09774913749926e-24	UP
ENSSSCG00000034810	PEF1	1.83249920286029	2.43150968606648e-39	1.35232642231671e-37	UP
ENSSSCG00000024189	SIL1	1.01054073592559	7.78402833636349e-14	6.35662081155169e-13	UP
ENSSSCG00000000292	ZNF385A	1.46333241126536	9.12996731271392e-12	6.0475255678391e-11	UP
ENSSSCG00000027860	ERAP2	2.67788245395508	4.7978923459651e-07	1.88702152236166e-06	UP
ENSSSCG00000000271	AMHR2	1.4524288431865	0.00852509109765113	0.0171959218897341	UP
ENSSSCG00000009123	CAMK2D	1.48811048487867	4.24028266392047e-37	2.09935563262729e-35	UP
ENSSSCG00000015999	FKBP7	1.26962817172128	1.05809870280807e-14	9.26386693685981e-14	UP
ENSSSCG00000003650	GJA9	1.20507371700433	0.0173420632374852	0.032692780106503	UP
ENSSSCG00000037875	ZNF688	1.37813170051499	0.000271030972168259	0.000721282888622317	UP
ENSSSCG00000017717	UNC45B	1.05673888362861	2.88109168710831e-07	1.16769767414903e-06	UP
ENSSSCG00000010447	ACTA2	1.28040881022024	5.24221078287262e-07	2.05281982424835e-06	UP
ENSSSCG00000010116	SLC25A1	1.03705046182927	1.45787135652367e-14	1.2623886060433e-13	UP
ENSSSCG00000018461	U1	1.4827185958088	5.78242620866638e-05	0.000172136597228043	UP
ENSSSCG00000010283	SPOCK2	2.28750558659827	3.70919615814957e-11	2.31939581459328e-10	UP
ENSSSCG00000008468	PKDCC	1.21699610088764	4.30965658159879e-11	2.67368129448082e-10	UP
ENSSSCG00000005641	DNM1	1.92979848695304	3.80814385342826e-54	5.16965765048729e-52	UP
ENSSSCG00000000135	KCTD17	1.09346068968311	0.000618876044139638	0.00154995240175817	UP
ENSSSCG00000034492	U3	1.20894248457743	0.0272121281274746	0.0486826013333382	UP
ENSSSCG00000034558	U1	1.47445187288455	0.0271025561149199	0.0484952030957023	UP
ENSSSCG00000011530	CRBN	1.18430603969622	1.55355592382207e-14	1.34329554976468e-13	UP
ENSSSCG00000011885	FBXO40	2.16363564284499	0.000272285146710307	0.000724315208010457	UP
ENSSSCG00000005225	RFX3	1.09114826247616	0.000280116778987408	0.000742177195113542	UP
ENSSSCG00000005220	PLPP6	1.40929979683338	0.000141002289296945	0.000394712616934353	UP
ENSSSCG00000034653	DLX4	1.19107767007229	4.79202600516256e-06	1.6671074211953e-05	UP
ENSSSCG00000032692	SPIN3	1.26456641708673	1.37869569171864e-07	5.80106187004973e-07	UP
ENSSSCG00000036438	GPX3	2.37767398916075	1.79932781768783e-12	1.28997806350419e-11	UP
ENSSSCG00000036383	LGALS3BP	2.2292920937972	1.83051766353853e-13	1.44079086671908e-12	UP
ENSSSCG00000033154	ARL6IP5	1.33997377182742	2.69845860197054e-28	7.18735017929918e-27	UP
ENSSSCG00000012759	ZNF185	1.47607980557359	3.42127121725433e-08	1.53604370973812e-07	UP
ENSSSCG00000005918	DGAT1	1.10161528484955	7.65681116339912e-06	2.58192417035026e-05	UP
ENSSSCG00000011407	RASSF1	1.12785142539251	3.99554610238383e-18	4.81793405373408e-17	UP
ENSSSCG00000005911	OPLAH	1.30277086865772	7.08672630646527e-09	3.43191099421266e-08	UP
ENSSSCG00000007962	SNRNP25	1.12860350250369	1.54101373449959e-10	9.04056617010098e-10	UP
ENSSSCG00000034723	PYCR1	1.02554713935144	6.17074491669025e-17	6.6929256506198e-16	UP
ENSSSCG00000004510	ACAA2	2.54464613075192	1.88942181561657e-17	2.15872854499178e-16	UP
ENSSSCG00000009831	CUX2	1.07264250960551	0.000232910980763124	0.000627641650402229	UP
ENSSSCG00000012999	CAPN1	1.58089397386245	8.38000068290318e-35	3.51486739606819e-33	UP
ENSSSCG00000008293	DGUOK	2.63045985521327	2.27980894324675e-12	1.61066524389984e-11	UP
ENSSSCG00000011714	MED12L	1.69584316861588	7.7883761990335e-18	9.15533049467392e-17	UP
ENSSSCG00000037096	TMEM88	1.83742557297745	0.000323073306858638	0.000847278873928191	UP
ENSSSCG00000011717	IGSF10	1.69185694229901	0.000202511066611928	0.000552442138283403	UP
ENSSSCG00000040855	C5orf51	1.21057225081526	1.03735067379057e-17	1.20372722946746e-16	UP
ENSSSCG00000040782	MRPS21	1.07491286848857	1.89827290341797e-09	9.86242609286084e-09	UP
ENSSSCG00000013573	TRAPPC5	1.67812343040751	9.0769834942133e-17	9.72809139341621e-16	UP
ENSSSCG00000013576	STXBP2	1.32337405033977	3.26417019016314e-05	0.000101427882477996	UP
ENSSSCG00000015253	NTM	2.11467187634392	0.000647727104003652	0.00161675656149587	UP
ENSSSCG00000004172	SLC2A12	1.03411470280041	0.00369585631573708	0.00803516204342702	UP
ENSSSCG00000038949	NALCN	1.53952050138974	8.8377099234879e-06	2.95487520614499e-05	UP
ENSSSCG00000023306	ELMO2	1.64326112347104	1.97148859313916e-24	3.91969188793415e-23	UP
ENSSSCG00000004178	SLC18B1	1.09805327718161	1.58262808273352e-05	5.11713389247447e-05	UP
ENSSSCG00000028814	SOD3	1.79653649602119	4.12470904566244e-51	4.56793435977968e-49	UP
ENSSSCG00000012171	PRDX4	1.03163911763061	1.36185915459994e-21	2.15727375493404e-20	UP
ENSSSCG00000017522	SP6	1.93120195602658	0.00523742110176323	0.0110406480897914	UP
ENSSSCG00000012377	KIF4A	1.14238296663365	1.66489000023126e-07	6.95310494638428e-07	UP
ENSSSCG00000031715	CARD9	1.35387351888737	2.86753899960353e-09	1.46155348687907e-08	UP
ENSSSCG00000002243	SLC12A6	1.10834377692897	1.6341312133652e-09	8.5498991167574e-09	UP
ENSSSCG00000002355	ENTPD5	1.86367935582495	9.19799423013815e-14	7.45271360018392e-13	UP
ENSSSCG00000002357	ALDH6A1	1.58657941017717	4.73672533603738e-09	2.35995096162083e-08	UP
ENSSSCG00000012280	UXT	1.1187259801616	6.26308765090892e-05	0.000185526704816342	UP
ENSSSCG00000012284	ZNF182	2.03918976859473	6.5089406117955e-11	3.95835140770319e-10	UP
ENSSSCG00000032369	HSD3B7	2.0238197479475	4.09268599504998e-27	9.95571496869096e-26	UP
ENSSSCG00000007074	TASP1	1.14224734749991	2.48420180649938e-05	7.80952385633832e-05	UP
ENSSSCG00000002828	LPCAT2	1.68356851062649	2.12683120254178e-09	1.09865973535556e-08	UP
ENSSSCG00000038492	PHETA2	1.06777848280238	4.83451759522792e-09	2.40203796299695e-08	UP
ENSSSCG00000020945	SMDT1	1.35063871093731	0.000127378736708299	0.000360088793314436	UP
ENSSSCG00000008988	CCNG2	1.82885765598502	6.63401550379367e-14	5.46700037437305e-13	UP
ENSSSCG00000006582	S100A14	1.63297506144286	1.34410626286121e-08	6.31593199152735e-08	UP
ENSSSCG00000036933	NR1D1	2.88023027131763	4.4912399450667e-48	4.02141165294093e-46	UP
ENSSSCG00000016295	NGEF	1.65276189028942	3.47182157048855e-21	5.34533503992901e-20	UP
ENSSSCG00000013622	TMEM205	2.54137154207422	8.43740775955571e-22	1.3483832020809e-20	UP
ENSSSCG00000013627	PRKCSH	1.00095792732775	6.53371056279531e-16	6.43432884986668e-15	UP
ENSSSCG00000029326	CCNB1	2.14990573013418	2.98003002439596e-25	6.33381802323216e-24	UP
ENSSSCG00000009717	CBR4	1.03051794399558	0.00140973052491007	0.00330692082441279	UP
ENSSSCG00000029324	COLEC10	1.50859252890905	0.0101881398351077	0.0202050369805583	UP
ENSSSCG00000039542	CNN2	1.54825214293313	3.34793467690572e-55	4.91484596464358e-53	UP
ENSSSCG00000025783	ENTPD3	1.44396967071449	1.09296936528306e-32	3.97658162440881e-31	UP
ENSSSCG00000039548	PTGFR	1.34971867018117	1.9247502415077e-12	1.37443279406305e-11	UP
ENSSSCG00000038839	TTC36	3.1586238841045	3.02690525681611e-06	1.0795107024662e-05	UP
ENSSSCG00000001934	SEC23A	1.01386668898286	2.98092032109924e-26	6.76872644853919e-25	UP
ENSSSCG00000006610	S100A11	1.26619375945958	7.05754627560727e-28	1.80733309796231e-26	UP
ENSSSCG00000006612	S100A10	1.36327062373543	5.82530783305959e-31	1.86188636436398e-29	UP
ENSSSCG00000016052	MFSD6	2.29176284493698	4.30110979015555e-21	6.58998921125168e-20	UP
ENSSSCG00000016050	INPP1	1.18817638271615	2.45986871335002e-17	2.77780344418998e-16	UP
ENSSSCG00000033703	FAM111A	1.14769061007947	2.05864677400781e-18	2.55559641316112e-17	UP
ENSSSCG00000014921	PRSS23	1.48332817000829	3.25506988731128e-32	1.13210075281832e-30	UP
ENSSSCG00000038231	ABCD4	1.464015660362	1.0856904300017e-06	4.09403873320532e-06	UP
ENSSSCG00000005062	TMEM260	1.26523363284784	5.47884000713119e-11	3.35615502620239e-10	UP
ENSSSCG00000040681	FABP4	2.29088840447241	1.01673971998143e-16	1.0841502504025e-15	UP
ENSSSCG00000040682	MAPK3	1.18818391576169	3.55950082332076e-20	5.03797061596688e-19	UP
ENSSSCG00000029521	CD82	1.00872088351742	0.0239033489584149	0.0433778612332885	UP
ENSSSCG00000002006	PSME1	1.43686409497953	5.10255644336585e-30	1.51933431833712e-28	UP
ENSSSCG00000002007	FITM1	1.95850897741387	0.00500361323781471	0.0105813429024138	UP
ENSSSCG00000005912	GPAA1	1.02687080894257	1.60474014573046e-08	7.47595732097677e-08	UP
ENSSSCG00000031988	MYOCD	1.5868469337577	1.39758417690316e-07	5.87366851977444e-07	UP
ENSSSCG00000002009	PCK2	2.3353800061645	8.25500805969024e-52	9.56141988565039e-50	UP
ENSSSCG00000002134	RNASE10	2.35171611971174	4.17952563579879e-11	2.60061661665646e-10	UP
ENSSSCG00000007231	MYLK2	1.63697077108171	0.00961856093390542	0.0191809085121712	UP
ENSSSCG00000016613	AASS	1.77998324196056	1.61427110590824e-11	1.03980473020875e-10	UP
ENSSSCG00000030005	LGALSL	1.72290790424578	2.78720730970212e-49	2.72779009961157e-47	UP
ENSSSCG00000031538	RNASE4	2.12200179828705	6.19559613365398e-13	4.61471393435879e-12	UP
ENSSSCG00000034016	U1	1.47445187288455	0.0271025561149199	0.0484952030957023	UP
ENSSSCG00000006885	ALG14	1.40356079824589	1.50279340612842e-06	5.57694495954477e-06	UP
ENSSSCG00000039054	CRTAP	1.29998202863517	9.16028277848241e-23	1.59956528462435e-21	UP
ENSSSCG00000014443	CAMK2A	1.44182246401366	0.00165752963725202	0.00384392205553027	UP
ENSSSCG00000032949	APH1B	1.94717641462768	2.43399653886106e-05	7.66505520157669e-05	UP
ENSSSCG00000001849	ANPEP	1.19539499805034	1.77929019522218e-36	8.54126947326236e-35	UP
ENSSSCG00000024496	NSUN7	2.37591628234478	9.91085366858184e-06	3.29188444003804e-05	UP
ENSSSCG00000017676	BCAS3	1.41788965596664	6.72486150201607e-11	4.08769265589566e-10	UP
ENSSSCG00000034120	CDKN2B	1.05541188578007	0.00824447634343109	0.0166912305702081	UP
ENSSSCG00000040599	TBC1D25	1.32292540961403	5.69118513961845e-10	3.14447318983295e-09	UP
ENSSSCG00000017776	ERAL1	1.17081817027676	4.71893331873981e-06	1.64349056963007e-05	UP
ENSSSCG00000026583	TLR1	1.52838874763253	0.0209977661764316	0.0386157025458775	UP
ENSSSCG00000000864	CHPT1	1.29093380827265	2.5177436156284e-10	1.44615619414507e-09	UP
ENSSSCG00000009589	SYK	1.29034421780912	3.35127135875657e-10	1.8950017315008e-09	UP
ENSSSCG00000000867	SPIC	2.18122975836617	0.00204356538062416	0.00466968559825883	UP
ENSSSCG00000006493	BGLAP	1.91746498059639	2.47953324917446e-06	8.95745554170389e-06	UP
ENSSSCG00000001201	ZKSCAN8	1.04221070160347	8.33672576561283e-07	3.18653232790984e-06	UP
ENSSSCG00000042718	GNAT1	2.09310303059536	0.000272215181524021	0.000724281700050742	UP
ENSSSCG00000029783	MKX	1.48306248895442	1.1311708269087e-09	6.01559885834976e-09	UP
ENSSSCG00000023565	IKZF5	1.02183718938626	2.79604588339931e-10	1.59608373005419e-09	UP
ENSSSCG00000006496	LMNA	2.04466260942149	1.70529913432026e-84	5.98038932522034e-82	UP
ENSSSCG00000017876	CYB5D2	1.03277450039451	1.44967114280079e-06	5.38931041750883e-06	UP
ENSSSCG00000024784	CACNA1S	2.31025222069867	0.000566579570627499	0.00142752479145206	UP
ENSSSCG00000027072	ATP5IF1	1.23194183115172	3.9956604629559e-17	4.41726911951123e-16	UP
ENSSSCG00000017258	FAM20A	2.13498444045269	1.13979643410066e-17	1.31896700096433e-16	UP
ENSSSCG00000027076	CYHR1	1.11879649572594	1.9708323643849e-10	1.1434631709724e-09	UP
ENSSSCG00000017257	ABCA9	1.694107490665	0.00420883326960637	0.0090398979293604	UP
ENSSSCG00000034261	TMEM59	1.48307491220626	5.18753942264772e-27	1.25464914197179e-25	UP
ENSSSCG00000040533	C19orf54	1.0497981066275	4.74999301007809e-05	0.000143534374706165	UP
ENSSSCG00000014288	GDF9	1.93298030346091	2.92547395623489e-26	6.65479435990368e-25	UP
ENSSSCG00000027252	HCFC1R1	1.68368533091536	0.0021078802159999	0.00480274097220696	UP
ENSSSCG00000007980	FAM234A	1.03986787160502	3.66167682917233e-06	1.29022243841196e-05	UP
ENSSSCG00000023121	ABCA7	2.03483488312233	0.000348728474200493	0.000910400534900996	UP
ENSSSCG00000030921	APOA1	1.29810599206262	0.00065756323744304	0.00164001103767649	UP
ENSSSCG00000017705	CCL5	2.57345926430762	9.07975604390701e-10	4.89582223568556e-09	UP
ENSSSCG00000034398	C8orf37	2.81074477974472	1.03070604430194e-15	9.94851973188987e-15	UP
ENSSSCG00000017063	SGCD	1.99026846975258	6.69226153183926e-34	2.58378598897464e-32	UP
ENSSSCG00000002143	PARP2	1.52463116055149	2.92930429323749e-07	1.18571550824377e-06	UP
ENSSSCG00000008479	DHX57	1.32440354097811	6.45370233739076e-22	1.04325213840664e-20	UP
ENSSSCG00000026780	EDIL3	1.1839327960843	1.8897195568901e-13	1.48461166183805e-12	UP
ENSSSCG00000032763	PYCR3	1.06895546201956	1.86825432304443e-06	6.85859576284848e-06	UP
ENSSSCG00000036731	TSPAN31	1.00574987639372	1.07725127376194e-14	9.41848845654047e-14	UP
ENSSSCG00000000682	GNB3	1.64371060027059	0.0114781691412937	0.0225263307024456	UP
ENSSSCG00000042447	APOBEC2	1.61556553041669	0.00166361756299018	0.00385733181501397	UP
ENSSSCG00000009228	MAPK10	1.07175025492237	0.0274510303993796	0.0490752278097094	UP
ENSSSCG00000015732	TFCP2L1	2.43247207536904	1.36652784615773e-26	3.18310222467553e-25	UP
ENSSSCG00000009221	DSPP	1.0950629031967	0.00620140014027531	0.0128665039886567	UP
ENSSSCG00000004347	FBXL4	1.19862053250724	5.20863141389612e-05	0.000156122914530956	UP
ENSSSCG00000008538	SPDYA	1.95991725976781	0.00436780751707806	0.00936223597675901	UP
ENSSSCG00000010948	CTSL	1.1441426445154	2.52591675058491e-12	1.77757519376447e-11	UP
ENSSSCG00000008061	ELOB	1.00966989523168	2.07159108794126e-13	1.62144063764776e-12	UP
ENSSSCG00000002852	PLEKHF1	1.1004651701154	2.09937465895562e-14	1.78843488996725e-13	UP
ENSSSCG00000006649	HORMAD1	2.42804522328791	6.44368872682817e-05	0.000190296070587615	UP
ENSSSCG00000011147	AKR1C2	2.40759759346107	0.000359740298990189	0.000937597290411052	UP
ENSSSCG00000031857	SMIM19	1.68612119505413	8.14658599618918e-21	1.22150413541435e-19	UP
ENSSSCG00000032607	ALPL	2.70578821186845	0.000169513876818996	0.000469220060258677	UP
ENSSSCG00000010537	GOT1	1.30544480763058	1.96551421955907e-11	1.25707279746369e-10	UP
ENSSSCG00000012966	C11orf68	1.35329844276971	2.55282497952665e-19	3.40691494360718e-18	UP
ENSSSCG00000009826	TCTN1	2.18574745768396	6.86469294103759e-23	1.21042944665642e-21	UP
ENSSSCG00000035608	U1	1.47445187288455	0.0271025561149199	0.0484952030957023	UP
ENSSSCG00000008263	M1AP	1.45064836601627	0.000862366231112315	0.00210628238881659	UP
ENSSSCG00000037066	GADD45A	1.6902934294744	3.08932630293409e-34	1.22650140171518e-32	UP
ENSSSCG00000038660	HAAO	1.62707770774572	0.00604901994975214	0.012581363569295	UP
ENSSSCG00000000059	XRCC6	1.44736752437944	9.3523625110276e-27	2.21942813349104e-25	UP
ENSSSCG00000037264	RAB31	1.20024125118019	3.75592306959154e-31	1.2189853150024e-29	UP
ENSSSCG00000004160	PEX7	1.06236659182525	7.35541924496002e-06	2.48760160641897e-05	UP
ENSSSCG00000010728	CPXM2	1.33380732109633	0.000590624996062346	0.00148361332576345	UP
ENSSSCG00000035511	C1QTNF1	1.91499128573688	2.77823731370881e-52	3.37261981592055e-50	UP
ENSSSCG00000003697	NDC80	1.14085913732414	7.30074295095706e-05	0.000213905499549392	UP
ENSSSCG00000015396	SEMA3D	1.48295855055694	5.51992012062887e-42	3.68724822872696e-40	UP
ENSSSCG00000006126	DECR1	1.11740751556918	1.34222174172726e-08	6.31119161612913e-08	UP
ENSSSCG00000013498	EBI3	1.38448610474824	0.0200563705134532	0.0371768723729771	UP
ENSSSCG00000031707	CTDSP2	1.52050152149021	3.95358060744059e-28	1.03478948783273e-26	UP
ENSSSCG00000038001	RBKS	1.63683188303796	6.78655824387032e-15	6.03807595693184e-14	UP
ENSSSCG00000012813	BRCC3	1.01277059978755	2.78932274462563e-05	8.73392848484588e-05	UP
ENSSSCG00000034860	HSCB	1.21956063634439	3.6422397304702e-06	1.28444906696051e-05	UP
ENSSSCG00000012816	MTCP1	2.21681270434879	3.29657116989887e-06	1.16940744647298e-05	UP
ENSSSCG00000012050	RCAN1	1.51060115179668	3.70703698665732e-49	3.60010322742682e-47	UP
ENSSSCG00000038486	DYNC2I1	1.19854201205107	0.000116485928796337	0.000331373332819682	UP
ENSSSCG00000024867	ISG20	1.7282888060374	0.00638173152014475	0.013188633236508	UP
ENSSSCG00000037793	NIT1	1.12832168172049	1.39994032861428e-06	5.21210458530089e-06	UP
ENSSSCG00000007680	MYL10	2.35223796707218	9.48066407864037e-06	3.15647109685745e-05	UP
ENSSSCG00000013634	YIPF2	1.0237260419684	6.792849586128e-11	4.125046946843e-10	UP
ENSSSCG00000029331	PALLD	1.98402129207464	1.41177771692461e-78	4.24373658956506e-76	UP
ENSSSCG00000007901	CIITA	1.5844696406872	2.46109291003202e-06	8.89530431982658e-06	UP
ENSSSCG00000029201	AJUBA	1.25818455892778	1.44535866019508e-10	8.49518300044829e-10	UP
ENSSSCG00000022048	REEP5	1.40860119194925	1.62885149986708e-40	9.7460901354606e-39	UP
ENSSSCG00000016049	HIBCH	1.66576697487772	8.58655544253509e-14	6.97588561531567e-13	UP
ENSSSCG00000001909	STRA6	1.39081729617924	0.00387507340726192	0.00837862677970229	UP
ENSSSCG00000016043	OSGEPL1	1.0412164389569	2.05826214195617e-08	9.4596139578437e-08	UP
ENSSSCG00000013033	BAD	1.95988664881791	1.95241896851064e-16	2.01712679848174e-15	UP
ENSSSCG00000013032	GPR137	1.04580576662821	3.60224359543153e-08	1.61270657419585e-07	UP
ENSSSCG00000002013	DHRS4	1.23176223876178	3.00645837035099e-16	3.07364237489881e-15	UP
ENSSSCG00000024263	SERF2	1.23330902894133	2.97507865333748e-18	3.63957054247923e-17	UP
ENSSSCG00000016608	IQUB	1.25719387835561	0.0103109864522954	0.0204294105398978	UP
ENSSSCG00000021784	TBCK	1.35023822452503	1.16404362640372e-10	6.89631665103095e-10	UP
ENSSSCG00000015200	ESAM	1.33899968710868	0.00483732632790313	0.0102709796316477	UP
ENSSSCG00000005092	SLC38A6	1.58708365319694	1.32164742537757e-13	1.05406182851496e-12	UP
ENSSSCG00000001474	RXRB	1.32702666008079	2.70368655966142e-17	3.04224980532312e-16	UP
ENSSSCG00000001475	SLC39A7	1.090669067229	8.40273010986989e-32	2.84408760421199e-30	UP
ENSSSCG00000001476	HSD17B8	1.25471256249815	0.00137778604562267	0.00323739974427437	UP
ENSSSCG00000016863	OXCT1	1.17918855634204	1.47398518168407e-05	4.78997758526675e-05	UP
ENSSSCG00000006862	VCAM1	2.35176811805426	0.000127674375668517	0.000360762979591547	UP
ENSSSCG00000000509	ZFC3H1	1.01639175535975	3.30494690446142e-21	5.09462205968564e-20	UP
ENSSSCG00000001871	HMG20A	1.8928273153629	4.80153200682674e-42	3.22443306309508e-40	UP
ENSSSCG00000033608	LOXL2	1.41972744456719	2.69207712514994e-31	8.75965817139638e-30	UP
ENSSSCG00000001875	SNX33	1.2424219679136	3.23026000830519e-19	4.27933185780199e-18	UP
ENSSSCG00000034137	PPIB	1.07394002517159	1.17473754318547e-26	2.76183640274052e-25	UP
ENSSSCG00000033606	H2AC6	1.33119242445349	7.38771692204204e-11	4.47123327616399e-10	UP
ENSSSCG00000005020	ATL1	1.39183020159696	0.0123044316171648	0.0239616611393962	UP
ENSSSCG00000031716	PTPRQ	2.37563227043879	0.00042433073950252	0.00109243134058741	UP
ENSSSCG00000040673	TMEM140	1.89653470761071	0.000137155066605008	0.000384625214546475	UP
ENSSSCG00000028460	S1PR5	1.64011569727548	0.00184363986285863	0.00424279133587134	UP
ENSSSCG00000024048	MMRN2	1.4924850754609	5.83956725774668e-06	2.01128910281172e-05	UP
ENSSSCG00000040678	TYMS	1.09229546319371	8.64006756389118e-18	1.01094395731349e-16	UP
ENSSSCG00000018700	RNase_MRP	1.12031685763543	0.000253926944539726	0.000680209563932536	UP
ENSSSCG00000000258	RARG	1.70203932310249	1.46025272251981e-29	4.18992968677559e-28	UP
ENSSSCG00000007189	SDCBP2	1.6962681273527	6.70340411571349e-07	2.59314604564404e-06	UP
ENSSSCG00000000257	ITGB7	2.63628295610683	3.44965140061563e-05	0.000106587980745894	UP
ENSSSCG00000035031	SNORD36	1.74732433081039	0.00654355975031918	0.0134965596875967	UP
ENSSSCG00000010403	MARCHF8	1.44781939118289	4.07745096995271e-07	1.62185943590589e-06	UP
ENSSSCG00000007185	SIRPB2	2.45235828373902	0.000103107270201779	0.000295377646085195	UP
ENSSSCG00000010132	COMT	1.08287678938737	2.55432593387192e-17	2.88189141332734e-16	UP
ENSSSCG00000011959	ABI3BP	1.01860718062713	0.00354782525207324	0.00774533871821281	UP
ENSSSCG00000010134	TANGO2	1.13531799304177	3.51602677310403e-14	2.94167249903502e-13	UP
ENSSSCG00000010138	ZDHHC8	1.37867811712162	7.48974319932902e-10	4.07753375987619e-09	UP
ENSSSCG00000031348	ALPK1	1.54211017693688	0.000257819741808397	0.000689467112969925	UP
ENSSSCG00000039103	ADIPOQ	1.31654278060307	0.0276420053105198	0.0493283781572603	UP
ENSSSCG00000012053	CBR3	1.21396825420468	0.000427205070231885	0.00109846517549441	UP
ENSSSCG00000023141	RNLS	1.48225231266321	0.0198099823395966	0.0367795627996187	UP
ENSSSCG00000023142	GAMT	1.18163344959309	0.000515501436914194	0.0013094981169098	UP
ENSSSCG00000011399	GNAI2	1.55977201592651	1.05802527608187e-50	1.11313075921114e-48	UP
ENSSSCG00000010554	SCD	1.78937951450815	1.71602139700668e-42	1.18386722061253e-40	UP
ENSSSCG00000014633	CAVIN3	1.79491267749226	5.36645996243605e-34	2.09109743906651e-32	UP
ENSSSCG00000029949	CD248	1.50363782799058	2.22193860153989e-22	3.72536186513163e-21	UP
ENSSSCG00000005203	IL33	2.84799022921125	7.23237046673086e-51	7.80830396205954e-49	UP
ENSSSCG00000004374	QRSL1	1.10590645363848	3.46098157720021e-11	2.16988864897972e-10	UP
ENSSSCG00000021811	GDPD3	1.13271090080351	0.000139498576752563	0.000390763153206368	UP
ENSSSCG00000003101	HIF3A	2.39681792808663	4.36091700620688e-05	0.000132379363316571	UP
ENSSSCG00000022301	EIF4EBP1	1.22176790635193	2.18782998506722e-17	2.4839346727944e-16	UP
ENSSSCG00000028943	ECH1	1.95930426211112	1.45161630978527e-15	1.38210074743884e-14	UP
ENSSSCG00000008073	OMD	1.87280007016307	1.03566578882734e-13	8.33882690302627e-13	UP
ENSSSCG00000008072	ASPN	1.55254176174895	4.36330139681926e-19	5.70846426267804e-18	UP
ENSSSCG00000004089	RMND1	1.05499622932521	2.69616977722456e-06	9.67570876562253e-06	UP
ENSSSCG00000011176	SUSD4	1.98162587211771	0.000104016252591693	0.000297846493302365	UP
ENSSSCG00000005979	ANXA13	1.9484277159456	0.00191626632337344	0.00439870224228904	UP
ENSSSCG00000022417	HNF1B	2.18032253934098	0.000627521223707093	0.00157035786903906	UP
ENSSSCG00000014418	STK32A	1.53637319935877	0.00330573965279907	0.00725769162987849	UP
ENSSSCG00000030172	CD40LG	1.5239570589999	0.0276809442426169	0.0493883438472354	UP
ENSSSCG00000012971	EFEMP2	1.23579845267173	1.25085389553544e-21	1.98392342099686e-20	UP
ENSSSCG00000005376	TBC1D2	1.84187295240242	2.51022361003966e-09	1.28566219378299e-08	UP
ENSSSCG00000035615	GSTK1	1.54628091420954	5.99423002025986e-06	2.06117672620245e-05	UP
ENSSSCG00000035612	COX6B2	1.92250266313356	4.85949964839204e-05	0.000146527783761523	UP
ENSSSCG00000031201	LMOD1	1.13288489988971	1.11845342919676e-12	8.14329558454964e-12	UP
ENSSSCG00000019093	SNORD16	1.87229328242893	0.000374009981172768	0.000971979417930465	UP
ENSSSCG00000032566	ZHX3	1.11409716478664	3.99464702585196e-17	4.41726911951123e-16	UP
ENSSSCG00000032561	PDCD1LG2	1.45052897303276	0.0260584547729839	0.0468977892386203	UP
ENSSSCG00000004578	ANXA2	1.44232483671703	1.74517181368399e-53	2.29508272372504e-51	UP
ENSSSCG00000011775	KLHL24	1.48772816522292	5.76168959082169e-05	0.000171559743122934	UP
ENSSSCG00000037077	SHMT2	1.56492942922758	8.00723589165342e-40	4.61604352201481e-38	UP
ENSSSCG00000015073	TAGLN	1.03232728284567	4.0224707730889e-15	3.66934201663637e-14	UP
ENSSSCG00000036673	PPT1	1.01737438695331	1.87568482872044e-11	1.20327850419693e-10	UP
ENSSSCG00000039946	CD34	1.44448351865521	0.000185557490760335	0.000509828796702771	UP
ENSSSCG00000015079	BACE1	1.15948004669623	2.14119496724796e-18	2.65285441231654e-17	UP
ENSSSCG00000036679	SORBS2	1.07694701990623	0.00161048137841058	0.00374306469116966	UP
ENSSSCG00000037275	SNX22	1.10410751359581	1.86441935634592e-26	4.3031616771238e-25	UP
ENSSSCG00000013552	GPR108	1.98999470748144	6.71812590635361e-33	2.47277957923365e-31	UP
ENSSSCG00000037470	SNORA70	1.00979680874209	5.26260989425321e-05	0.000157591199988014	UP
ENSSSCG00000031866	TIMP3	2.12828470008273	2.03854134791439e-73	5.361788441129e-71	UP
ENSSSCG00000037472	U1	1.47445187288455	0.0271025561149199	0.0484952030957023	UP
ENSSSCG00000035506	UBAP1L	2.39397583341515	3.66352870654214e-08	1.63724070513609e-07	UP
ENSSSCG00000004405	FIG4	1.61598876632418	2.68045255893696e-15	2.4835026265569e-14	UP
ENSSSCG00000003351	MMP23B	1.00197960948565	1.97345342656891e-11	1.26151136761684e-10	UP
ENSSSCG00000015387	TRA2A	1.73852267338911	3.00034794955849e-35	1.31070563540401e-33	UP
ENSSSCG00000022230	CD9	1.45209202047532	2.91641498338536e-10	1.66154057604874e-09	UP
ENSSSCG00000022545	CALM3	1.1150546010931	6.85940016483913e-25	1.4012933184643e-23	UP
ENSSSCG00000011602	XPC	1.41434649913608	1.77950275434867e-32	6.40063312639656e-31	UP
ENSSSCG00000020963	EPDR1	1.94262171331708	3.29482050022371e-61	5.94244411647491e-59	UP
ENSSSCG00000012399	FOXO4	1.16658436338416	1.48395384891955e-06	5.51189095104718e-06	UP
ENSSSCG00000002868	PEPD	1.02743932833125	2.65797554236683e-13	2.05997183685582e-12	UP
ENSSSCG00000034923	ABHD16A	1.96364212537391	3.323729657858e-37	1.66516217978005e-35	UP
ENSSSCG00000038036	TTLL11	1.43526770569835	7.98926412016284e-05	0.00023246015099575	UP
ENSSSCG00000034924	JRKL	1.14248446053419	1.85202698715865e-05	5.92695582075488e-05	UP
ENSSSCG00000006580	S100A2	2.19732361044199	1.54992616278427e-10	9.08862879942006e-10	UP
ENSSSCG00000015273	ATP2B4	1.10213976524055	3.96576960493664e-31	1.2772408485287e-29	UP
ENSSSCG00000015271	PRELP	1.31384794445678	1.50757852925538e-17	1.73660391713953e-16	UP
ENSSSCG00000033355	LGI3	1.01707756358153	0.000312252916971905	0.000821632571231826	UP
ENSSSCG00000033359	CUEDC2	1.21216832671675	1.97966025489856e-14	1.69101561015523e-13	UP
ENSSSCG00000005893	ZNF34	1.74806799754556	5.26754898971368e-09	2.60590932582818e-08	UP
ENSSSCG00000012920	CORO1B	1.48449344810497	6.13474331637839e-19	7.9355670460325e-18	UP
ENSSSCG00000040111	MSANTD1	2.30566766444192	0.000308326067784229	0.000811976763824759	UP
ENSSSCG00000031602	DNAJC5	1.24673266336878	1.93913939464803e-14	1.65864734806445e-13	UP
ENSSSCG00000013601	MARCHF2	1.03490763495928	3.98842185430433e-05	0.000122040295469201	UP
ENSSSCG00000017428	JUP	1.58649554581036	6.02661504555953e-33	2.23782396912321e-31	UP
ENSSSCG00000003850	CZIB	1.04608224972464	2.92229203644871e-09	1.48765874839375e-08	UP
ENSSSCG00000013736	PRDX2	1.2352129048587	2.76396370687482e-19	3.68091158220407e-18	UP
ENSSSCG00000038859	INO80C	1.19985269625816	1.05632881852879e-10	6.28767153886183e-10	UP
ENSSSCG00000038584	FGF12	1.7576660680795	0.000278230940538966	0.000738110028221148	UP
ENSSSCG00000038854	PSMF1	1.61466423428022	8.81851987469045e-24	1.67167888014965e-22	UP
ENSSSCG00000025010	UNC50	1.84572474698809	7.63606222136931e-32	2.60554825796723e-30	UP
ENSSSCG00000039854	TLCD4	1.9110325874306	2.06377448217121e-06	7.53256803625659e-06	UP
ENSSSCG00000003854	ECHDC2	1.37205391320154	4.70838973640426e-09	2.34861400324392e-08	UP
ENSSSCG00000001910	ISLR	2.38028214505692	1.29284285982783e-09	6.84123219345323e-09	UP
ENSSSCG00000031510	FNTA	1.19402742131768	2.00296110891232e-20	2.92002124711524e-19	UP
ENSSSCG00000031512	U4	2.3381031999896	3.06026225209992e-18	3.73292859253734e-17	UP
ENSSSCG00000013046	COX8A	1.04553216669763	3.21658697434441e-12	2.24113744763235e-11	UP
ENSSSCG00000013040	TRPT1	1.15614722214247	0.002164692458389	0.00492241395662124	UP
ENSSSCG00000028549	ECM2	1.5742753608533	3.16841182800174e-17	3.53679923329106e-16	UP
ENSSSCG00000002501	BDKRB1	1.20397940216827	2.10153990772201e-05	6.68310864861218e-05	UP
ENSSSCG00000010912	KIF14	1.58361584465145	0.000659789151138411	0.00164523761270441	UP
ENSSSCG00000039679	ZNF623	1.07243240953579	1.13059460320949e-10	6.70759251199238e-10	UP
ENSSSCG00000029541	PSD2	2.95000047132483	2.74459903622145e-10	1.5700300331806e-09	UP
ENSSSCG00000017131	FN3K	1.82163606237015	0.00181746035380396	0.00418635959984949	UP
ENSSSCG00000025470	TSSK4	1.6679409502118	2.72325528290088e-06	9.7578723147656e-06	UP
ENSSSCG00000007307	NFS1	1.25064914114148	2.72412053981729e-14	2.2973962468399e-13	UP
ENSSSCG00000014999	KBTBD3	1.1846442924617	0.00178965284321825	0.00412305969810773	UP
ENSSSCG00000016677	GARS1	1.12424790233062	8.06143303220163e-37	3.91444584736714e-35	UP
ENSSSCG00000021793	SMIM14	1.17923592764531	2.24043417403909e-20	3.24003223908861e-19	UP
ENSSSCG00000010638	TCF7L2	1.05332455778593	1.20046755099569e-15	1.15166434888454e-14	UP
ENSSSCG00000008038	SLC9A3R2	1.30278617175004	1.84983911906598e-15	1.74155248905354e-14	UP
ENSSSCG00000025876	PBLD	1.00585593126649	0.000604155334776003	0.00151609244713716	UP
ENSSSCG00000025870	HEPACAM2	1.44238086640289	0.0215181470160907	0.0394749500258857	UP
ENSSSCG00000035299	SFRP4	1.91575010469124	4.40000197637272e-35	1.88945663101039e-33	UP
ENSSSCG00000032964	STK11IP	1.04428270472673	0.012125797393389	0.0236668206890194	UP
ENSSSCG00000006304	MPC2	1.10969990248744	1.2244349952869e-14	1.06437563342849e-13	UP
ENSSSCG00000006540	PBXIP1	1.34358459957999	2.02362999993472e-23	3.73513578204325e-22	UP
ENSSSCG00000039188	AK8	2.16607163490587	0.00067693386120606	0.00168399802910867	UP
ENSSSCG00000016707	HOXA1	1.29305117960129	0.0187793209771188	0.0350671390824027	UP
ENSSSCG00000001867	PSTPIP1	1.03825763095126	0.0162632463636146	0.0308525147018233	UP
ENSSSCG00000009075	MFSD8	1.05342781832137	3.82186094234267e-07	1.52307431808953e-06	UP
ENSSSCG00000015027	C11orf1	1.0536741436456	2.34518331691181e-07	9.6067291940336e-07	UP
ENSSSCG00000024052	GPX4	1.07352359860051	3.62605714349807e-16	3.67702581820587e-15	UP
ENSSSCG00000017818	SERPINF1	1.3122208250298	1.52616505806682e-28	4.12587448781447e-27	UP
ENSSSCG00000024059	VAT1	1.17360024814246	7.18113911095171e-24	1.36333656053782e-22	UP
ENSSSCG00000035341	C6orf89	1.09310536515182	7.02627041396444e-22	1.12858351114887e-20	UP
ENSSSCG00000009671	PBK	1.58145755050885	4.22423857218116e-10	2.36606086840227e-09	UP
ENSSSCG00000035347	CYP2C42	2.07532443481559	2.2710907787878e-07	9.31833639330384e-07	UP
ENSSSCG00000015816	LETM2	1.69523257000962	0.000510239957394192	0.00129822238252754	UP
ENSSSCG00000032740	TMEM106B	1.68834878917306	1.48447948694449e-41	9.51347894551989e-40	UP
ENSSSCG00000005284	GNA14	1.03281388224976	1.92643049373422e-06	7.06395149096559e-06	UP
ENSSSCG00000038229	EML2	1.24401882181328	1.15302309893714e-05	3.79185116542887e-05	UP
ENSSSCG00000032748	SWI5	1.74075527131622	2.39518827448671e-20	3.44410614640031e-19	UP
ENSSSCG00000009111	SYNPO2	1.36431148865387	3.35695210591786e-17	3.73734747241737e-16	UP
ENSSSCG00000008397	EFEMP1	1.76232672445798	8.61789613361105e-09	4.15429319155554e-08	UP
ENSSSCG00000010092	PI4KA	1.02914904196718	2.24641596210035e-26	5.14718720898673e-25	UP
ENSSSCG00000014139	ARSK	1.31962411848729	5.06214087936452e-09	2.51019358216721e-08	UP
ENSSSCG00000032985	GOT2	1.06705571244985	7.50301002283452e-20	1.03979694334013e-18	UP
ENSSSCG00000011941	IFT57	1.07724827425678	4.84375427865529e-06	1.68417509688854e-05	UP
ENSSSCG00000011940	DZIP3	2.02444577321587	8.56832044681977e-05	0.000248392756925602	UP
ENSSSCG00000035757	SSBP2	1.88127102837747	5.80242807580023e-16	5.74103875054686e-15	UP
ENSSSCG00000038941	SNAPC5	1.45003799290576	7.62917289853337e-05	0.000222804320712431	UP
ENSSSCG00000014395	PCDH12	1.96215831068665	4.11494270474768e-10	2.30688950477085e-09	UP
ENSSSCG00000032404	KLHL11	1.18459321603722	5.11874432232068e-07	2.00758456257529e-06	UP
ENSSSCG00000026748	PLK1	2.59534422731291	5.73775440908893e-41	3.58609650568058e-39	UP
ENSSSCG00000010896	ASPM	2.04375450813334	7.25998242633756e-13	5.37894824721313e-12	UP
ENSSSCG00000036712	TPD52L2	1.4034462381016	8.04684841995537e-34	3.07852913036171e-32	UP
ENSSSCG00000036247	MRM2	1.01276244457314	7.98382794255919e-11	4.81355433499569e-10	UP
ENSSSCG00000008300	STAMBP	1.40549416255562	2.60597581595877e-14	2.20364666285864e-13	UP
ENSSSCG00000013989	GJC2	1.50679672658611	0.0207585132822129	0.0382613143505687	UP
ENSSSCG00000036403	FAM180A	1.72037119276126	2.11112762699428e-12	1.49904309847035e-11	UP
ENSSSCG00000011168	ZNF510	1.4869028321461	0.0135608721597046	0.0261542943807318	UP
ENSSSCG00000010966	CCL19	1.67848417161514	0.00641421966668237	0.0132492675542973	UP
ENSSSCG00000014406	PRELID2	1.00619658965398	0.000731513464664751	0.00181298733635502	UP
ENSSSCG00000029219	SH3BGR	1.06601902631249	4.83052929991262e-05	0.000145758681671599	UP
ENSSSCG00000014247	ALDH7A1	1.02579564369004	4.58447565282308e-15	4.15498959920254e-14	UP
ENSSSCG00000012940	B4GAT1	1.41112196813872	3.9924570399306e-06	1.40286028747909e-05	UP
ENSSSCG00000023080	TPP1	1.03928590604898	3.30613182426162e-14	2.77157465347297e-13	UP
ENSSSCG00000004565	CA12	1.62226417661386	7.19801633621954e-41	4.45465471788096e-39	UP
ENSSSCG00000031981	SHISA4	1.53826826315853	3.91865997368603e-18	4.73880097392588e-17	UP
ENSSSCG00000016157	MYL1	1.64557885985621	5.27265536925658e-05	0.000157854574429367	UP
ENSSSCG00000008245	TMSB10	1.37190292155091	4.86726266071329e-24	9.32461169825574e-23	UP
ENSSSCG00000036060	RRAD	1.13852893314434	1.14217856374223e-09	6.06902540708995e-09	UP
ENSSSCG00000011768	CCDC39	1.17215856123994	0.0107197405262067	0.0211728291838798	UP
ENSSSCG00000002921	CLIP3	1.06776422586778	1.34761883124721e-15	1.28599302679487e-14	UP
ENSSSCG00000015047	TTC12	1.18660415284064	0.0126194109343157	0.0245032394718141	UP
ENSSSCG00000031877	ABHD8	1.21022685619122	0.000182048933579765	0.000500733722536934	UP
ENSSSCG00000005944	NDRG1	1.02804853727394	4.08288239545669e-19	5.36941565027507e-18	UP
ENSSSCG00000005946	CCN4	1.65593177728711	3.586005868836e-16	3.63933473424876e-15	UP
ENSSSCG00000024254	ALKBH7	1.09724488898592	2.59151213732921e-06	9.33461932490194e-06	UP
ENSSSCG00000023886	RPA3	1.36035003692931	7.97728856598368e-10	4.32803043169506e-09	UP
ENSSSCG00000038931	C6orf120	1.71066727842142	3.62156243493634e-56	5.44312211203229e-54	UP
ENSSSCG00000004787	GPR176	2.08268603596897	9.23048069949017e-18	1.0750444541611e-16	UP
ENSSSCG00000028287	C2orf68	1.22703148105068	9.24568107494267e-13	6.77069162245657e-12	UP
ENSSSCG00000006808	SLC16A4	1.24605039216721	0.0124504871812465	0.0242162071581015	UP
ENSSSCG00000010416	ZNF32	1.26874248884679	0.00109004864526385	0.00260888419838031	UP
ENSSSCG00000011616	COPG1	1.0707107118684	3.12334836541879e-28	8.23220733056623e-27	UP
ENSSSCG00000012122	TCEANC	1.16033160148842	0.000472212905679046	0.00120633102674989	UP
ENSSSCG00000034435	U1	1.47445187288455	0.0271025561149199	0.0484952030957023	UP
ENSSSCG00000028996	ALDH1A1	4.05847327692025	2.88355410128215e-113	2.02249280714929e-110	UP
ENSSSCG00000012519	GPRASP1	1.78267089953053	5.0888971409114e-09	2.52151202494687e-08	UP
ENSSSCG00000015284	MDM4	1.76498218718722	2.5398893643032e-26	5.80907667107389e-25	UP
ENSSSCG00000008559	TMEM214	1.32205384758112	6.97042732747662e-36	3.21173886895592e-34	UP
ENSSSCG00000022445	TEX12	1.2981905392995	0.0124430381211224	0.0242054478088089	UP
ENSSSCG00000019707	SNORA75	1.83384779555592	0.00318673850664624	0.00701649348559623	UP
ENSSSCG00000000133	TST	1.87032572075229	6.53299194768875e-10	3.58292890267465e-09	UP
ENSSSCG00000023969	ACER1	1.79834622054253	0.00393630257803212	0.00849501197395822	UP
ENSSSCG00000038442	TMLHE	1.00969627969424	7.25595159573202e-10	3.96050103312221e-09	UP
ENSSSCG00000031617	SFT2D2	1.03092389059284	3.95947748614928e-05	0.000121213392974381	UP
ENSSSCG00000003256	PRKCG	1.68626887768366	0.00106445208784161	0.00255343104864153	UP
ENSSSCG00000030585	HOXC6	2.35038339812841	2.98153147885708e-29	8.34630486043695e-28	UP
ENSSSCG00000025007	NFU1	1.34754509315158	8.24603790359935e-16	8.03909100640477e-15	UP
ENSSSCG00000015860	SFT2D3	1.38086999937775	4.30689385357021e-06	1.50705473673293e-05	UP
ENSSSCG00000003815	ALG6	1.2457739148976	0.000220341133198491	0.000597082379616	UP
ENSSSCG00000031503	PRRX1	1.42907567668956	9.17501434135134e-46	7.57088601696474e-44	UP
ENSSSCG00000029790	PCYOX1	1.47115549033023	3.95883819899572e-28	1.03478948783273e-26	UP
ENSSSCG00000013054	ATL3	1.21997991742225	2.76863803003658e-41	1.75648518237245e-39	UP
ENSSSCG00000013425	MISP	1.20660583691102	0.00948477844686229	0.0189260831186402	UP
ENSSSCG00000007557	MICALL2	1.92161641405743	5.02705577277013e-32	1.72933458123223e-30	UP
ENSSSCG00000007556	PSMG3	1.59067088040462	3.77238068096246e-08	1.68469423760704e-07	UP
ENSSSCG00000010177	TRIM67	1.55148515685747	0.0199506051085089	0.0370188697082488	UP
ENSSSCG00000035991	CENPM	1.62654924826819	0.00037853112367921	0.000981909890373953	UP
ENSSSCG00000035997	RPL10	1.02148339778761	4.98716181154279e-18	5.94550688108855e-17	UP
ENSSSCG00000016668	PDE1C	1.44272159436247	2.93623137498e-18	3.59553066043865e-17	UP
ENSSSCG00000039244	PHYH	1.36650927257447	2.14146347361096e-20	3.10758348900441e-19	UP
ENSSSCG00000029179	HIGD2A	1.75647492226796	1.68369557928309e-07	7.02699394659472e-07	UP
ENSSSCG00000039243	CD81	1.00359624107844	6.3137582745077e-20	8.82737521768103e-19	UP
ENSSSCG00000010621	ADD3	2.04881046752173	2.43201535955939e-42	1.64193550344585e-40	UP
ENSSSCG00000010620	XPNPEP1	1.14432583150012	9.9443693232694e-19	1.26305495680358e-17	UP
ENSSSCG00000021741	ZNF527	1.98527794753777	0.000481045749098701	0.00122839858057668	UP
ENSSSCG00000002671	ATP2C2	1.9543017139049	0.00389761068209696	0.00842158734579397	UP
ENSSSCG00000006687	ITGA10	1.15505304454515	7.86589387240773e-05	0.000229240328114376	UP
ENSSSCG00000006370	TSTD1	1.21448844184668	0.00251762914897479	0.00564465778828036	UP
ENSSSCG00000006371	USF1	1.22788761549591	4.22596891394918e-14	3.51931777959159e-13	UP
ENSSSCG00000006577	S100A5	2.25555610568918	8.64115087413933e-05	0.000250446578939415	UP
ENSSSCG00000006571	INTS3	1.54398271716714	2.98293871450199e-24	5.811666862745e-23	UP
ENSSSCG00000006578	S100A4	1.83228720472323	7.39174993881365e-44	5.58807442979175e-42	UP
ENSSSCG00000033629	KLHL10	2.35126217852157	0.000267053168426315	0.000711897434835774	UP
ENSSSCG00000033627	YIPF3	1.13050460540324	3.60840265251272e-21	5.54210261410866e-20	UP
ENSSSCG00000016487	MGAM2	2.66412769359705	5.58664912146925e-09	2.75190968234683e-08	UP
ENSSSCG00000034114	GPR68	1.09469198722733	4.3509918479414e-12	2.99516205453981e-11	UP
ENSSSCG00000025910	ZNF277	1.88959486700098	5.9735184541182e-21	9.03181682434039e-20	UP
ENSSSCG00000028204	TREH	2.41190246519833	1.68613911877027e-05	5.42557757191762e-05	UP
ENSSSCG00000028192	DNAJC28	1.1655337757149	0.00789362626525423	0.0160375010619303	UP
ENSSSCG00000028197	PFKL	1.06395590608403	1.03737358105441e-21	1.65155630022848e-20	UP
ENSSSCG00000017829	SGSM2	1.29597873548596	1.04873271838745e-16	1.11637863150435e-15	UP
ENSSSCG00000030228	PIWIL2	1.45569406326447	2.10765272289182e-06	7.68161536562046e-06	UP
ENSSSCG00000009666	EPHX2	1.3715210479765	1.21726968920887e-06	4.56430942270922e-06	UP
ENSSSCG00000037905	ITGB5	1.10713265621547	4.81666511311864e-10	2.68123443796838e-09	UP
ENSSSCG00000005174	RRAGA	1.21572636241357	3.00703400272114e-20	4.28969539936208e-19	UP
ENSSSCG00000034581	LRIG2	1.17662758560891	2.46837654124111e-12	1.73999183881457e-11	UP
ENSSSCG00000008441	ATP6V1E2	1.58981018106155	0.0219137244780499	0.0401073893208727	UP
ENSSSCG00000026592	TLR6	1.53995638399754	0.00999766005288461	0.0198709789306782	UP
ENSSSCG00000010391	ERCC6	1.03709433407993	1.3286092225665e-11	8.63732823630387e-11	UP
ENSSSCG00000017759	ALDOC	1.87141952943743	2.6811992712848e-15	2.4835026265569e-14	UP
ENSSSCG00000021418	LSS	2.02411767111932	1.45312779854552e-40	8.736065931732e-39	UP
ENSSSCG00000034502	H6PD	1.09227068824449	1.35899429034202e-20	1.99968565449511e-19	UP
ENSSSCG00000027428	ENHO	1.58765959966648	7.4969676345723e-14	6.13013059497897e-13	UP
ENSSSCG00000011978	CPOX	1.36926315967831	1.8017006166842e-16	1.87059788533207e-15	UP
ENSSSCG00000032994	RNF187	1.19148133721252	1.96660001367165e-05	6.27611859772614e-05	UP
ENSSSCG00000010400	MSMB	1.30290007878021	3.41989293198365e-06	1.21077252569528e-05	UP
ENSSSCG00000031262	TXNIP	2.86739708116782	4.11988659508104e-55	5.97857106470094e-53	UP
ENSSSCG00000004055	RSPH3	1.36678949065908	0.00374110077898184	0.00812513286334865	UP
ENSSSCG00000035199	PTGES3L	1.32754690976603	4.98089692365571e-05	0.000149973345244821	UP
ENSSSCG00000036275	NSMCE1	1.31527372411985	8.21031700565567e-19	1.05447865916992e-17	UP
ENSSSCG00000011377	LAMB2	1.21790755971939	6.99422715387824e-17	7.56011282685897e-16	UP
ENSSSCG00000005576	ZBTB6	2.53217181965802	2.69254937112937e-103	1.54515617320492e-100	UP
ENSSSCG00000008336	ANXA4	1.9769166612941	2.93628661181992e-23	5.34158767640152e-22	UP
ENSSSCG00000005778	HSBP1L1	1.01855095068593	0.00163561140475066	0.00379797571914236	UP
ENSSSCG00000029967	PEX1	1.39066914825278	4.13536169649645e-13	3.14322344480841e-12	UP
ENSSSCG00000017904	ENO3	2.87000875075768	6.00860182449538e-45	4.8317578365767e-43	UP
ENSSSCG00000011284	NKTR	1.16143081371878	7.18108797985944e-12	4.83526590643869e-11	UP
ENSSSCG00000011119	ECHDC3	1.05988854635697	2.81326107767921e-09	1.43504731740202e-08	UP
ENSSSCG00000004954	C15orf61	1.58560125772231	2.70829905364227e-06	9.71371464552092e-06	UP
ENSSSCG00000014274	PDLIM4	1.74120310158277	4.12442623104272e-28	1.07584465220897e-26	UP
ENSSSCG00000003046	RABAC1	1.66557459620846	1.86468639010904e-31	6.16273970553053e-30	UP
ENSSSCG00000012953	YIF1A	1.42148625974399	3.39450449115335e-18	4.12867237002033e-17	UP
ENSSSCG00000007956	NLRC3	1.76483430703607	0.00807870291574579	0.0163818863333265	UP
ENSSSCG00000006972	C8orf48	1.5535410721246	5.58831175256482e-05	0.000166711805000309	UP
ENSSSCG00000036509	RWDD3	2.33505686641736	4.13070469092774e-11	2.57277487533116e-10	UP
ENSSSCG00000036501	WDR1	1.02458211572714	9.99989380252286e-28	2.5300332516403e-26	UP
ENSSSCG00000036059	HSPB3	1.6334821864995	2.31309132774123e-05	7.30800250568895e-05	UP
ENSSSCG00000037582	F2RL2	1.08550822163073	1.39490668697875e-07	5.86436793976248e-07	UP
ENSSSCG00000011023	ZNF438	1.54879455144278	0.000642082732511275	0.00160361908960531	UP
ENSSSCG00000037051	U4	1.97206908718389	8.37348375973632e-13	6.16056133255659e-12	UP
ENSSSCG00000004969	KIF23	1.27909832383484	6.99637116675656e-11	4.2425161373824e-10	UP
ENSSSCG00000037459	TCTA	1.23390807252995	1.19512903813864e-07	5.05646920459125e-07	UP
ENSSSCG00000004136	AIG1	1.93626010561034	8.93655121504771e-20	1.22901916220019e-18	UP
ENSSSCG00000004425	LAMA4	1.081098640434	1.07688594941422e-17	1.24731056067472e-16	UP
ENSSSCG00000037455	NDUFS8	1.09939679732503	1.45471708790504e-12	1.04887511335244e-11	UP
ENSSSCG00000007098	DTD1	1.35561689976547	5.46315437951637e-15	4.89512590783493e-14	UP
ENSSSCG00000012480	TNMD	2.00998626132672	0.0013605558958636	0.00319810429813403	UP
ENSSSCG00000003333	C1QTNF12	1.50933497166557	0.000937055697147799	0.00227300350026718	UP
ENSSSCG00000044553	DDIT3	1.47462491806866	2.29263991752466e-07	9.40064272775213e-07	UP
ENSSSCG00000032213	DBI	1.21809326030778	3.82750074033089e-18	4.63300065644079e-17	UP
ENSSSCG00000021902	GABRP	2.70355043926495	4.72185391047211e-14	3.91420916741368e-13	UP
ENSSSCG00000022005	SFXN3	1.001517593852	9.06925813609869e-08	3.90649552945227e-07	UP
ENSSSCG00000008991	FRAS1	1.08632497225093	0.0147406678265532	0.0282142103259906	UP
ENSSSCG00000012135	VEGFD	1.66159511104602	0.0166855671845969	0.0315730344282877	UP
ENSSSCG00000011629	ACAD11	1.34973234717261	1.17769937547146e-07	4.99108916258047e-07	UP
ENSSSCG00000037630	SNORA73	1.28813665188355	6.08365339015719e-05	0.000180423124385094	UP
ENSSSCG00000034905	MVD	1.75506542234133	5.23580501331305e-13	3.93601473780764e-12	UP
ENSSSCG00000015298	SRI	1.36172355690872	4.63944888419644e-12	3.17986113805538e-11	UP
ENSSSCG00000013532	CAPS	3.12589127632601	8.23532985984562e-12	5.49239511254892e-11	UP
ENSSSCG00000022692	RINL	2.00804668054231	0.0026309866037463	0.00587897449067205	UP
ENSSSCG00000034831	U1	1.47445187288455	0.0271025561149199	0.0484952030957023	UP
ENSSSCG00000003024	PRR19	1.58255916153659	0.00209154623886709	0.0047681060429211	UP
ENSSSCG00000023451	KCNK2	2.06476134756358	1.54397860635071e-09	8.09835060456074e-09	UP
ENSSSCG00000036566	LY6G6C	1.44681136555697	6.96281518303194e-09	3.37708573514323e-08	UP
ENSSSCG00000033335	AKIP1	1.50127873293597	5.89158350946316e-16	5.82468612427348e-15	UP
ENSSSCG00000016017	DNAJC10	1.27834800058926	5.75718177813448e-32	1.97512010730836e-30	UP
ENSSSCG00000007797	ITGAL	1.58268878613528	7.53079161680733e-07	2.88985544565935e-06	UP
ENSSSCG00000031660	MAPK8IP2	2.22690418466137	2.17860407363791e-08	9.97637882832014e-08	UP
ENSSSCG00000014892	USP35	2.00005577480601	1.58007369350258e-07	6.60325401538237e-07	UP
ENSSSCG00000034808	U1	1.47445187288455	0.0271025561149199	0.0484952030957023	UP
ENSSSCG00000013281	EXT2	1.01933954378568	1.21571327828545e-05	3.98659224372827e-05	UP
ENSSSCG00000002314	SMOC1	2.12601114516849	0.000182708143266942	0.000502328028907915	UP
ENSSSCG00000002315	SLC8A3	1.11539751165732	2.00912837411766e-10	1.16461183302275e-09	UP
ENSSSCG00000023084	ATP2B2	1.66322714505721	0.00792108039322417	0.0160855139077457	UP
ENSSSCG00000030597	HAPLN3	1.1961044727096	2.02591436263443e-07	8.35582124412274e-07	UP
ENSSSCG00000040985	KCTD7	1.5199300735218	3.01281514201213e-07	1.21795680973113e-06	UP
ENSSSCG00000025078	ZNF358	1.24751402721684	3.21793755621378e-11	2.02551872606097e-10	UP
ENSSSCG00000013263	CREB3L1	1.39980793564002	3.76824082003805e-50	3.83661615749841e-48	UP
ENSSSCG00000003806	LEPROT	1.51459180037624	4.37189916863619e-26	9.82121476940068e-25	UP
ENSSSCG00000007763	BCKDK	1.00490998439991	4.37220161755951e-11	2.70982059016637e-10	UP
ENSSSCG00000013064	EEF1G	1.1926270068507	1.85334200997383e-29	5.24628764034072e-28	UP
ENSSSCG00000001660	PTK7	1.17289080435117	7.5944909701918e-23	1.33352501388973e-21	UP
ENSSSCG00000001664	TTBK1	1.81028302253408	0.00343467361251541	0.0075176679310325	UP
ENSSSCG00000033432	CHMP4A	1.08415982256144	0.000231946001659129	0.000625174694907451	UP
ENSSSCG00000025106	THNSL2	1.2054735717733	0.00217280032940088	0.00493640528318986	UP
ENSSSCG00000016658	ANLN	1.81948160521096	1.3895830237011e-42	9.69253352167205e-41	UP
ENSSSCG00000016129	GPR1	1.50714708662201	0.000965734481489157	0.00233391995191436	UP
ENSSSCG00000021176	LPXN	1.43044491366283	0.0251508289800289	0.0454197133275446	UP
ENSSSCG00000023774	Metazoa_SRP	1.58821157104166	0.0210388089838446	0.0386855466677888	UP
ENSSSCG00000016127	NDUFS1	1.21609812543465	2.9165603079023e-24	5.69112424841832e-23	UP
ENSSSCG00000028643	SLC6A20	1.17639770262387	0.00400014075626212	0.00862246492194115	UP
ENSSSCG00000002446	ATXN3	1.38363197390544	3.14982485634003e-26	7.13941450831112e-25	UP
ENSSSCG00000035289	U1	1.47445187288455	0.0271025561149199	0.0484952030957023	UP
ENSSSCG00000002681	HSDL1	1.03495728660361	2.75313787081571e-06	9.84935268321006e-06	UP
ENSSSCG00000001401	ATP6V1G2-DDX39B	1.63296392124354	0.00412694326274428	0.00888214433892712	UP
ENSSSCG00000039094	PLEC	1.01552578234827	6.21337538162995e-17	6.7333789006934e-16	UP
ENSSSCG00000002042	OXA1L	1.16651541307708	3.78021569898242e-24	7.30860998463293e-23	UP
ENSSSCG00000007564	AMZ1	2.46069891629387	1.39231397017831e-12	1.00617995841449e-11	UP
ENSSSCG00000017635	MKS1	1.52091748345648	0.00487777387151764	0.0103516381119365	UP
ENSSSCG00000001887	SCAMP5	1.03907620985965	9.72869596461641e-11	5.80731851315755e-10	UP
ENSSSCG00000001659	KLC4	1.21326834089299	4.20346113987836e-07	1.66935189968431e-06	UP
ENSSSCG00000025924	IGFBP5	1.32638554459316	6.04076833670845e-38	3.1128449082018e-36	UP
ENSSSCG00000017401	ATP6V0A1	1.48755148892795	4.12267805447684e-13	3.1354705082994e-12	UP
ENSSSCG00000009090	KIAA1109	1.13836513950257	6.32010397455042e-10	3.47371844487153e-09	UP
ENSSSCG00000001655	MEA1	1.09863766371929	7.39071793081499e-12	4.96582298438208e-11	UP
ENSSSCG00000017299	MARCHF10	1.6341662670109	0.00392407048922611	0.00847150990534878	UP
ENSSSCG00000040629	IL34	1.52747989591123	0.000668992650796152	0.00166555555438797	UP
ENSSSCG00000017521	SCRN2	2.53318099624245	2.02193610840976e-14	1.72362885676389e-13	UP
ENSSSCG00000018964	SNORA67	2.23172169554966	0.000489358737943377	0.00124836412740657	UP
ENSSSCG00000028699	NEIL2	1.0990568495777	0.0207601312074282	0.0382613143505687	UP
ENSSSCG00000017526	COPZ2	1.24933042772556	7.7396674745301e-14	6.32448555766618e-13	UP
ENSSSCG00000035369	RD3	1.79164366642253	0.000175455522666675	0.000483863253312969	UP
ENSSSCG00000009652	KCTD9	1.07566029202367	2.27371785520383e-08	1.03930803482797e-07	UP
ENSSSCG00000030211	NBR1	1.48441501767877	2.40299199554056e-35	1.06823147689083e-33	UP
ENSSSCG00000035364	VKORC1	1.77480925343992	5.67171502971604e-23	1.00852679225584e-21	UP
ENSSSCG00000011965	TMEM45A	1.69703004696252	9.82466604493591e-39	5.27814505605599e-37	UP
ENSSSCG00000038811	MOB3B	1.61966450368933	0.000236930636725974	0.00063752116126714	UP
ENSSSCG00000000204	PRPF40B	1.00794421891015	4.06103843891396e-05	0.000124081825487146	UP
ENSSSCG00000026951	PSMB8	1.02417860657784	2.034094392125e-05	6.47841617068066e-05	UP
ENSSSCG00000027565	ARHGAP45	3.62230298764448	1.29168991704475e-15	1.23448790330734e-14	UP
ENSSSCG00000009055	ELMOD2	1.17254111597056	0.00012357272552792	0.000350270691466095	UP
ENSSSCG00000033815	SST	1.02940193696834	6.65498861206489e-05	0.00019616911330217	UP
ENSSSCG00000000683	CDCA3	1.69061316524876	1.24434078089365e-07	5.24884809849058e-07	UP
ENSSSCG00000026900	CDIN1	1.01648926828147	0.000196159974133647	0.000536640994685445	UP
ENSSSCG00000015905	SCN2A	3.56138989784552	1.76202435745939e-15	1.66508664018899e-14	UP
ENSSSCG00000031273	IMPG2	1.22971852387211	0.00542364319431023	0.0114027469322509	UP
ENSSSCG00000010166	NTPCR	1.58455406396706	1.68845992515441e-10	9.85976251391046e-10	UP
ENSSSCG00000000117	C22orf23	3.16278550964851	3.82037549311945e-18	4.62881387722006e-17	UP
ENSSSCG00000000110	PLA2G6	1.11435510772752	4.40756568257207e-05	0.000133698983042942	UP
ENSSSCG00000028875	HAVCR2	1.45180682311332	0.0227855486817607	0.041540440737506	UP
ENSSSCG00000010184	AGT	1.4949976674973	8.1010490508538e-09	3.91261454732323e-08	UP
ENSSSCG00000011366	SLC25A20	1.20933461764498	1.76405602786053e-14	1.51607946574127e-13	UP
ENSSSCG00000014083	ANKDD1B	1.61229949644437	0.000413391353052068	0.00106511547597599	UP
ENSSSCG00000024604	ATAT1	1.09375701776794	0.000105323075621591	0.000301246902972945	UP
ENSSSCG00000001952	NFKBIA	2.32269962983304	2.03257853245403e-08	9.34838031775306e-08	UP
ENSSSCG00000007943	NMRAL1	1.00562146037817	6.42390364194346e-07	2.49084101595627e-06	UP
ENSSSCG00000012403	OGT	1.16660738095408	1.01461514106576e-19	1.38781323466471e-18	UP
ENSSSCG00000011294	GASK1A	1.33757143953966	0.020150755926573	0.0373299036790878	UP
ENSSSCG00000017192	EVPL	2.0942595659266	2.70321197453633e-06	9.69822426215436e-06	UP
ENSSSCG00000011296	ANO10	1.07650918412459	3.69498799794422e-11	2.31165626729662e-10	UP
ENSSSCG00000031874	REM2	1.76975761634692	3.56175593960746e-06	1.25852697278321e-05	UP
ENSSSCG00000011563	FANCD2	1.23807417643063	8.314031932698e-15	7.34532212388469e-14	UP
ENSSSCG00000012926	PC	1.03353678304464	2.07862538084967e-09	1.07463740512806e-08	UP
ENSSSCG00000015604	NEK2	1.41490839575145	4.91291733804778e-05	0.000148032413825425	UP
ENSSSCG00000009862	RNFT2	1.51351414873834	7.82604873002406e-06	2.63627113611967e-05	UP
ENSSSCG00000034779	NT5C3B	1.10049091501199	3.825717001384e-12	2.65091532066262e-11	UP
ENSSSCG00000011582	CAND2	1.92963817062552	9.23422970385804e-24	1.74524176663485e-22	UP
ENSSSCG00000019590	SNORA27	1.69975190519932	0.000284855430766302	0.000753151793387342	UP
ENSSSCG00000009881	OAS2	1.0552633502779	9.40090488036141e-08	4.03551814675444e-07	UP
ENSSSCG00000040397	COLEC12	1.94879054893419	5.42748094422873e-47	4.72565151178536e-45	UP
ENSSSCG00000009885	HECTD4	1.19377149154598	8.77614273557634e-26	1.93366146660822e-24	UP
ENSSSCG00000009888	ERP29	1.29400956659985	1.461443134072e-18	1.83406755145716e-17	UP
ENSSSCG00000015119	MFRP	1.91066738833396	1.87492675538291e-26	4.31951647567686e-25	UP
ENSSSCG00000004945	RPL4	1.05637216015348	1.57776566854291e-34	6.48836858806329e-33	UP
ENSSSCG00000021871	FDXACB1	1.07956361410882	0.000131905242373486	0.000371139666807502	UP
ENSSSCG00000019350	SNORD15	1.50976931014954	9.85058024446375e-09	4.70539446032368e-08	UP
ENSSSCG00000038918	CTSF	1.03956934469953	2.09660465729436e-08	9.62532138121502e-08	UP
ENSSSCG00000006639	C1orf56	1.71915994500081	0.000384810781803382	0.000996765720202646	UP
ENSSSCG00000021917	HIPK4	1.89142503107256	0.000362838120884129	0.00094489093980242	UP
ENSSSCG00000038914	SEC61B	1.045538861294	3.02956049010355e-16	3.09451465918748e-15	UP
ENSSSCG00000038912	IFITM3	1.46479048262507	5.48862426443714e-27	1.32240231562059e-25	UP
ENSSSCG00000037334	ADSS1	1.25757711758916	1.05977674926123e-05	3.50528725685698e-05	UP
ENSSSCG00000002515	SLC25A47	2.00630685415851	6.39154105357265e-08	2.78636760363794e-07	UP
ENSSSCG00000015331	PON2	1.42628720728911	1.25027875596738e-20	1.8505005034101e-19	UP
ENSSSCG00000050014	MRPS16	3.40340190323009	4.18592538301672e-23	7.50671988076506e-22	UP
ENSSSCG00000022865	GRM8	1.34614590560492	0.00272648428237213	0.00607945320822115	UP
ENSSSCG00000012859	NADSYN1	1.87699590037421	0.00238993275311946	0.00538898035508718	UP
ENSSSCG00000012585	DCX	1.20265053987447	0.00937169707580866	0.0187241138759431	UP
ENSSSCG00000027550	PLCD1	1.19611958177478	4.61782971472581e-12	3.16676263706754e-11	UP
ENSSSCG00000012850	DEAF1	1.12711111677714	2.24874873011999e-13	1.75683494540624e-12	UP
ENSSSCG00000013854	CIB3	2.08849271364079	0.000955085244030295	0.00231083771672719	UP
ENSSSCG00000023991	RIT1	1.42226286450924	2.2605863972484e-09	1.16441873787275e-08	UP
ENSSSCG00000013853	HSH2D	2.11728995981512	0.000108216591474589	0.000308823342533156	UP
ENSSSCG00000025842	SPAG8	1.24164988121533	1.53319960597016e-07	6.42224453396593e-07	UP
ENSSSCG00000015885	PLA2R1	1.67259200193972	0.00281489801732969	0.00626332172520046	UP
ENSSSCG00000037158	MTURN	1.3707714694246	4.8793270238507e-26	1.09416525179601e-24	UP
ENSSSCG00000019768	U12	1.54130055717206	9.67442306677516e-08	4.14313403046256e-07	UP
ENSSSCG00000038044	GYG2	1.11713200581131	6.6739357391831e-14	5.49631041795086e-13	UP
ENSSSCG00000007151	CDC25B	1.08244849374495	1.1206635072867e-08	5.31693978936285e-08	UP
ENSSSCG00000038867	PPM1K	1.05710639125922	5.22993865997123e-08	2.29902421943373e-07	UP
ENSSSCG00000031139	IKZF4	1.42158334322381	2.38896066561485e-05	7.53232076338529e-05	UP
ENSSSCG00000032857	S100A12	1.49000774773231	0.0224144208518222	0.0409347697460227	UP
ENSSSCG00000001658	MRPL2	1.14068873790413	2.32474210858663e-10	1.3420150489669e-09	UP
ENSSSCG00000013072	FADS2	1.26137367228593	6.12012900469704e-16	6.04117503395623e-15	UP
ENSSSCG00000001657	CUL7	2.11167579445136	3.40815763231104e-15	3.12930837148559e-14	UP
ENSSSCG00000029571	AVIL	3.04600789040154	9.54252345160453e-30	2.79522873727395e-28	UP
ENSSSCG00000029371	C5AR1	1.21516271747438	0.00824437793125231	0.0166912305702081	UP
ENSSSCG00000039793	PATJ	1.13459868224872	0.00301114526344505	0.0066600751490879	UP
ENSSSCG00000016130	ZDBF2	2.05380905306834	4.19721696786308e-07	1.66739660853592e-06	UP
ENSSSCG00000006173	GDAP1	1.76137616400442	0.00191110230168941	0.00438924259756755	UP
ENSSSCG00000025284	COQ9	1.44659010934498	3.43398326297054e-19	4.54444850052443e-18	UP
ENSSSCG00000035956	HABP4	1.36171533481265	5.89366819213078e-28	1.52787599436655e-26	UP
ENSSSCG00000035952	TGFB1I1	1.71484107745203	2.18307357911269e-36	1.04398878546582e-34	UP
ENSSSCG00000006194	NCOA2	1.08987561549482	2.78489391731231e-15	2.57200334353094e-14	UP
ENSSSCG00000028517	SC5D	1.10395745908239	2.59737273190963e-10	1.48986055158379e-09	UP
ENSSSCG00000021610	CHPF	1.18464074932935	2.50133431316142e-24	4.91125127584181e-23	UP
ENSSSCG00000006512	FDPS	1.72821077048413	3.52534983958774e-30	1.05718626424692e-28	UP
ENSSSCG00000006511	RUSC1	1.08364028988481	4.74521697647559e-06	1.65173323209276e-05	UP
ENSSSCG00000020744	DUSP3	1.0035769939616	6.63237482727254e-16	6.52640157399188e-15	UP
ENSSSCG00000014908	CCDC89	1.40565990424197	7.94201621220307e-05	0.000231298626710643	UP
ENSSSCG00000029606	AOX1	2.53605537544554	4.4940058133254e-34	1.76750228639356e-32	UP
ENSSSCG00000030209	MFNG	1.54209156296915	0.0196840254292131	0.0365941424007975	UP
ENSSSCG00000037697	MGP	2.88759971284471	3.98422253923301e-12	2.75319154667853e-11	UP
ENSSSCG00000032684	BOK	1.02178246908212	4.71964254569039e-15	4.26830137101298e-14	UP
ENSSSCG00000032687	CYP4V2	1.84111204523858	8.31204823207717e-18	9.75275175929128e-17	UP
ENSSSCG00000001502	RPS18	1.02160797635263	1.20881105276193e-18	1.52918231874943e-17	UP
ENSSSCG00000017998	GLP2R	2.46338196619956	0.00026777061131169	0.000713659271228645	UP
ENSSSCG00000016912	PLPP1	1.12898887746348	9.81503861235973e-25	1.98263779969666e-23	UP
ENSSSCG00000006353	NR1I3	1.61480853664842	0.0016364163580102	0.00379914610516345	UP
ENSSSCG00000024088	TLN2	1.30563247882193	7.50268137388385e-27	1.79396500653946e-25	UP
ENSSSCG00000001435	AGPAT1	1.28698848336919	1.01840184283466e-20	1.51798385664553e-19	UP
ENSSSCG00000000439	KIF5A	2.45086242117097	5.42260705706998e-06	1.8780136891703e-05	UP
ENSSSCG00000001437	AGER	2.81300717206464	3.11712768426425e-06	1.10980645837101e-05	UP
ENSSSCG00000001438	PBX2	1.2553883700486	3.92754241800972e-20	5.54024838294667e-19	UP
ENSSSCG00000003783	FPGT	2.03676084383476	0.00223895990813132	0.00507575306880191	UP
ENSSSCG00000040631	LPL	1.14751659106465	3.50610432988052e-12	2.43747616545934e-11	UP
ENSSSCG00000015413	FGL2	1.14428240930326	1.03380064568067e-11	6.80841583292562e-11	UP
ENSSSCG00000030206	STK33	1.54651565941036	0.0253888122576005	0.0457956553726463	UP
ENSSSCG00000027197	DYRK1B	1.59100817409739	5.342191027505e-08	2.34428785965418e-07	UP
ENSSSCG00000017777	FLOT2	1.09183988832388	5.25527598967874e-15	4.72226757079673e-14	UP
ENSSSCG00000031240	U1	1.72072716443312	9.55423895480892e-32	3.20972007121223e-30	UP
ENSSSCG00000006579	S100A3	1.53234835233948	0.00438650333196504	0.00939592883713245	UP
ENSSSCG00000000105	KDELR3	1.3266184101106	1.65795867410123e-28	4.45355920436765e-27	UP
ENSSSCG00000014187	NUDT12	1.23765250534299	0.00110699549491854	0.00264693525063383	UP
ENSSSCG00000011351	TMA7	1.28090385396965	2.36568486615812e-19	3.16385290627608e-18	UP
ENSSSCG00000024019	GTF2H5	1.22426347612954	1.0057135151023e-07	4.29247232189538e-07	UP
ENSSSCG00000005083	DHRS7	1.71340284782694	7.01268785505706e-18	8.274316277579e-17	UP
ENSSSCG00000005082	PCNX4	1.25775994914981	3.84802673542348e-08	1.71604865894459e-07	UP
ENSSSCG00000001507	ZBTB22	1.1813259245908	4.20657060095914e-16	4.23508403804698e-15	UP
ENSSSCG00000035162	U2AF1L4	1.00030952856487	0.000390426259555098	0.00100986099710779	UP
ENSSSCG00000008237	RETSAT	1.2306102773468	1.92963051635704e-13	1.51314194217438e-12	UP
ENSSSCG00000015581	CENPF	1.70348084086877	4.09959964941525e-14	3.41633304117938e-13	UP
ENSSSCG00000008230	ATOH8	2.01575119036025	1.25940564476636e-09	6.67506140435569e-09	UP
ENSSSCG00000026395	TARS2	1.50062591331946	1.22542871348953e-11	7.99123838213083e-11	UP
ENSSSCG00000008238	ELMOD3	1.65100866667347	4.57420005105442e-17	5.01731326190809e-16	UP
ENSSSCG00000000442	INHBE	1.43565880040499	0.00554768031360461	0.0116383290061911	UP
ENSSSCG00000026153	ACAT1	1.82374090846984	7.18465100744308e-37	3.51574492127786e-35	UP
ENSSSCG00000036452	LRRC17	3.05817921898018	4.89038820284682e-16	4.88845218218061e-15	UP
ENSSSCG00000014219	CDO1	1.57306885426366	0.0154029733240056	0.0293572672426888	UP
ENSSSCG00000010209	FAM13C	2.28740000597376	2.91680494745759e-20	4.16568579882942e-19	UP
ENSSSCG00000015613	C1orf74	1.39154948426423	1.72774351477681e-07	7.20130798087064e-07	UP
ENSSSCG00000007853	LYRM1	1.09519551297012	0.000245195576962081	0.000658777220503568	UP
ENSSSCG00000036030	INKA2	2.3702863485914	1.23440928100878e-25	2.67773490940478e-24	UP
ENSSSCG00000006995	ASAH1	1.71443619072973	4.18221384143183e-24	8.03659813517151e-23	UP
ENSSSCG00000040385	RFNG	1.50648860652644	1.39837350115011e-24	2.80675126423213e-23	UP
ENSSSCG00000004840	OTUD7A	2.46957561380454	7.06513369189265e-17	7.63022351241615e-16	UP
ENSSSCG00000004684	SPG11	1.54361684506557	2.98092813294061e-27	7.33610481059944e-26	UP
ENSSSCG00000016821	SLC45A2	1.06137106333434	1.53391422925132e-05	4.9693782766995e-05	UP
ENSSSCG00000004931	IGDCC4	1.49034944939675	4.27041967983269e-07	1.69381239264492e-06	UP
ENSSSCG00000005423	ABCA1	1.00401622261206	3.86851302176372e-11	2.41662428994394e-10	UP
ENSSSCG00000015105	SLC37A4	1.35144509632154	3.81303960248602e-05	0.000116985722919529	UP
ENSSSCG00000005426	FSD1L	1.04072074074005	2.0853675851637e-07	8.5870077503887e-07	UP
ENSSSCG00000015107	VPS11	1.10811990608784	4.13494595087349e-17	4.55927446548278e-16	UP
ENSSSCG00000003642	INPP5B	1.43251212998214	8.16634440034022e-31	2.5969797998563e-29	UP
ENSSSCG00000025616	SENP8	1.7580169564898	2.0755375723691e-09	1.07348061659811e-08	UP
ENSSSCG00000002849	SHCBP1	1.2000034372481	0.000123124109955095	0.000349077450748502	UP
ENSSSCG00000036781	PRELID3A	2.01720050629719	0.000131220563691078	0.000369689111849529	UP
ENSSSCG00000002844	PHKB	1.03229886480585	5.8623140953713e-17	6.37482475917852e-16	UP
ENSSSCG00000002847	GPT2	1.85729591347505	8.7599981032404e-31	2.76487440133525e-29	UP
ENSSSCG00000015326	COL1A2	1.45679183744643	1.77197371424083e-43	1.31595106719355e-41	UP
ENSSSCG00000023273	SH3YL1	2.04588555012268	0.00247423824483649	0.00555922011764739	UP
ENSSSCG00000004063	TMEM242	1.47360143204862	2.82996504187457e-09	1.44298500216747e-08	UP
ENSSSCG00000022903	NAPEPLD	1.28090599793089	0.000150524675155144	0.000419508614532825	UP
ENSSSCG00000012840	CD151	1.36814160473898	5.58179914635289e-25	1.14959566431819e-23	UP
ENSSSCG00000012591	AMOT	1.04303060813256	9.48216548613088e-07	3.59820677073647e-06	UP
ENSSSCG00000003006	CYP2B22	1.73045612149882	2.100397461588e-05	6.68115846625058e-05	UP
ENSSSCG00000013863	SMIM7	1.60521690826065	1.06390031953374e-29	3.1020188300493e-28	UP
ENSSSCG00000048594	NRN1L	1.34832375454517	0.000324741614271671	0.00085130043193103	UP
ENSSSCG00000016034	COL3A1	1.27880234489494	2.07035126847828e-32	7.36286894775725e-31	UP
ENSSSCG00000022492	AMPD3	1.1924821545462	0.00011809419272806	0.000335645921474957	UP
ENSSSCG00000022250	SPACA9	1.20756008365732	0.0260635585836008	0.0469002889278734	UP
ENSSSCG00000032019	DNASE1L3	2.19606062307937	8.09592149728635e-06	2.72127286749841e-05	UP
ENSSSCG00000009646	ADAM7	1.10411903286444	3.54106338304346e-06	1.25226681263092e-05	UP
ENSSSCG00000038844	SMIM5	2.31095164635272	0.00103009922692647	0.00247855969886539	UP
ENSSSCG00000033268	CABCOCO1	1.10337629669837	0.00355755914012579	0.00776122069191085	UP
ENSSSCG00000038094	GPX7	1.23658190272312	3.69095203599775e-25	7.72773954468849e-24	UP
ENSSSCG00000013243	DDB2	1.38970526303474	6.41824932365799e-05	0.000189677897264003	UP
ENSSSCG00000029744	PLCH2	1.4750933191103	0.0200490896539312	0.0371688336095273	UP
ENSSSCG00000039514	ID3	1.41604552179566	0.000743113384615467	0.00183884878102122	UP
ENSSSCG00000051205	P2RX4	1.23044886063006	6.01849525300425e-11	3.66892817813514e-10	UP
ENSSSCG00000038526	FBXL18	1.25792874242589	6.59514197570544e-19	8.52238151927135e-18	UP
ENSSSCG00000014980	CFAP300	1.07044933950639	9.81593983410955e-06	3.26293418656222e-05	UP
ENSSSCG00000006690	NUDT17	1.4009887455783	0.0187048326743761	0.0349435502388277	UP
ENSSSCG00000013084	TMEM216	1.24796950822342	0.0216872206732545	0.0397273884213346	UP
ENSSSCG00000006545	CHRNB2	2.5835741295621	0.000127365232836637	0.000360088793314436	UP
ENSSSCG00000022705	SALL2	1.64113694294324	1.25066057617341e-10	7.3921300440961e-10	UP
ENSSSCG00000051680	IFN-OMEGA-6	1.73584017626033	0.000835475442346094	0.00204733646343545	UP
ENSSSCG00000025126	LGI4	1.44846029873941	0.00653889263278467	0.0134891371713899	UP
ENSSSCG00000006762	AP4B1	1.00084297041332	1.86463895090843e-06	6.85129998696711e-06	UP
ENSSSCG00000006168	PEX2	1.1526433725572	8.40253206066877e-06	2.81683396882483e-05	UP
ENSSSCG00000006163	PKIA	1.17678419524082	7.00468267377146e-29	1.9266692539513e-27	UP
ENSSSCG00000031793	ZNF331	1.30842173204632	0.00729588181283483	0.0149142661734197	UP
ENSSSCG00000031421	DYNLRB2	1.53744135309422	0.0178913764859947	0.0335679340371055	UP
ENSSSCG00000009522	PCCA	1.14826011188429	6.37921571543564e-09	3.10835964520938e-08	UP
ENSSSCG00000038329	PIGK	1.27428633420471	2.52578843592708e-08	1.15119418785485e-07	UP
ENSSSCG00000033106	GTF2A1L	1.88832291274532	3.42154478365332e-05	0.000105797215022344	UP
ENSSSCG00000016695	HIBADH	1.03209306399469	7.01693091480941e-09	3.39941491939635e-08	UP
ENSSSCG00000006187	MSC	1.01124872915162	1.01436856634604e-06	3.8388498651435e-06	UP
ENSSSCG00000006186	TRPA1	1.60989876605393	3.80302891949635e-05	0.000116735327276055	UP
ENSSSCG00000028431	HSD17B4	1.20446794624322	1.38740787025063e-24	2.78917585380799e-23	UP
ENSSSCG00000010589	SFXN2	1.23251588395144	0.00285923291571923	0.00635413053352496	UP
ENSSSCG00000032330	THY1	1.77439671967734	3.5437217004615e-39	1.9536893654291e-37	UP
ENSSSCG00000016582	FAM71F1	1.41923949959016	9.84709294908017e-06	3.2715670653194e-05	UP
ENSSSCG00000016583	FAM71F2	1.78066999147164	0.000187092173953329	0.000513710025263327	UP
ENSSSCG00000024892	NSG1	1.3139058173429	0.000186900297690165	0.00051329481364767	UP
ENSSSCG00000006501	SSR2	1.32385003522184	8.47360710354322e-37	4.09882335947253e-35	UP
ENSSSCG00000006503	RXFP4	3.33073229313397	3.33920148765529e-53	4.30177742669878e-51	UP
ENSSSCG00000016213	GLB1L	1.0436566061727	0.000653585572327243	0.0016310570963889	UP
ENSSSCG00000016214	STK16	2.02525514372068	9.38602714648253e-24	1.77127941291991e-22	UP
ENSSSCG00000017617	SCPEP1	1.1965375224945	4.49280604872032e-22	7.35689706421454e-21	UP
ENSSSCG00000040735	DDAH1	1.1030668449747	8.87673568054345e-26	1.95241790883033e-24	UP
ENSSSCG00000037951	ZNF891	1.05789076396056	0.00023533424875139	0.000633765974933086	UP
ENSSSCG00000002738	ZNF23	1.31372538702021	7.30421451742512e-05	0.000213957559820167	UP
ENSSSCG00000034200	SEC22C	1.16954795147761	3.63093099423393e-06	1.28117674125778e-05	UP
ENSSSCG00000024145	PRR11	2.16762289514101	5.34299290192215e-21	8.11736286242685e-20	UP
ENSSSCG00000030544	TMEM143	1.50829098737251	3.88407810110323e-08	1.73090314247894e-07	UP
ENSSSCG00000001510	KIFC1	1.17844825356669	1.36635351264386e-05	4.45626791452564e-05	UP
ENSSSCG00000001427	C4A	1.7882088009825	0.000159343656634844	0.000442816127011865	UP
ENSSSCG00000006345	OLFML2B	2.48234715037804	3.5441813568359e-12	2.46259161420216e-11	UP
ENSSSCG00000016367	RNPEPL1	1.03733615442296	2.14717507641181e-16	2.21652373995905e-15	UP
ENSSSCG00000001422	C2	1.29575100283559	0.000774433770571888	0.00190998756660873	UP
ENSSSCG00000000915	DCN	2.1304521189072	1.08134705992974e-62	2.03761293009148e-60	UP
ENSSSCG00000000916	LUM	2.58757411282372	1.44726003180251e-86	5.37401702985492e-84	UP
ENSSSCG00000040607	MAF	1.22259178309187	1.23317322032709e-09	6.5387702253799e-09	UP
ENSSSCG00000022296	CDK15	1.69800674249843	0.000534717547296365	0.00135368137850744	UP
ENSSSCG00000004628	TMOD2	1.82189523161565	0.000147207224117054	0.000410897900614153	UP
ENSSSCG00000033757	FKBP2	1.18433446224234	9.04658738915727e-12	5.99859064013185e-11	UP
ENSSSCG00000010345	GHITM	1.30047615292382	1.22896853333805e-41	7.91618761907798e-40	UP
ENSSSCG00000010340	PRXL2A	1.17225393314534	9.05496470028849e-41	5.54946258937584e-39	UP
ENSSSCG00000010342	SH2D4B	2.10480899591935	4.30363944297e-08	1.90911623216782e-07	UP
ENSSSCG00000008692	ADD1	1.03487013595316	2.05145778473392e-19	2.75528239704954e-18	UP
ENSSSCG00000017769	RAB34	1.66095603048713	6.83641086313596e-27	1.6408685769409e-25	UP
ENSSSCG00000026706	PIGS	1.02979611492622	2.80176300844436e-06	1.00147955780323e-05	UP
ENSSSCG00000009684	PRSS55	1.02303423077528	0.00101356881558466	0.00244204318640388	UP
ENSSSCG00000026367	IFT172	1.10380432557529	4.59571955183315e-12	3.1533130077116e-11	UP
ENSSSCG00000032652	SLFN11	1.25205860107046	4.57265448968815e-05	0.000138440678494755	UP
ENSSSCG00000008687	MXD4	1.84386109876933	3.19993116127193e-65	6.51598885662228e-63	UP
ENSSSCG00000010527	MARVELD1	2.0880779130746	4.77929026663286e-10	2.66160298263078e-09	UP
ENSSSCG00000035152	TEF	1.09993144291811	2.15425356467576e-15	2.01313480784837e-14	UP
ENSSSCG00000035227	ESRP2	1.43202570997612	0.0127704181894373	0.0247888268206712	UP
ENSSSCG00000009330	ALOX5AP	1.68250629371032	0.00882358570858488	0.0177526326009377	UP
ENSSSCG00000004215	KIAA0408	1.57737207076372	0.0145541955037593	0.0278911229864848	UP
ENSSSCG00000032536	B3GNT8	2.06235881918205	0.000133143134941768	0.000374539233208517	UP
ENSSSCG00000026146	GALNT5	2.02010947160913	2.7668725457658e-22	4.60234069700834e-21	UP
ENSSSCG00000036201	NPR3	1.20815973000434	0.0095459648307507	0.0190421561049498	UP
ENSSSCG00000015309	MTERF1	1.29511626846106	7.97839287030638e-07	3.05141502537468e-06	UP
ENSSSCG00000023048	Metazoa_SRP	1.80022545197597	2.46759909479211e-40	1.45576815755843e-38	UP
ENSSSCG00000007909	ABAT	1.75892214109139	0.00424571204998238	0.0091113572379785	UP
ENSSSCG00000011664	RBP1	1.88932944385511	0.00461935335572224	0.00984624955529179	UP
ENSSSCG00000012902	CDK2AP2	1.37282368706657	3.71716445173189e-14	3.10378314835417e-13	UP
ENSSSCG00000040296	EHHADH	1.31684522286179	2.39959792932998e-10	1.38332985652014e-09	UP
ENSSSCG00000010832	HHIPL2	1.28180772186504	0.00434620101028344	0.00932067058855587	UP
ENSSSCG00000006988	PDGFRL	2.8530595459519	5.99269951865337e-17	6.51100098304637e-16	UP
ENSSSCG00000010835	AIDA	1.42631946037478	2.18885561730279e-40	1.3035048192664e-38	UP
ENSSSCG00000016092	SGO2	1.19119201847221	0.00011267276965017	0.000320815001541137	UP
ENSSSCG00000006982	ZDHHC2	1.23749429393481	6.21206951786678e-24	1.1811352057691e-22	UP
ENSSSCG00000014539	ZFP62	1.28212501374176	3.61995764104441e-06	1.2776618735864e-05	UP
ENSSSCG00000004588	CCNB2	1.20169643584113	4.53890531533011e-05	0.000137517829628132	UP
ENSSSCG00000024990	MPI	1.90710383497545	3.07397519004244e-09	1.56109962889324e-08	UP
ENSSSCG00000037556	COG5	1.00080758192437	4.29144154835882e-08	1.90437432506257e-07	UP
ENSSSCG00000004857	ATP9B	1.15334192385123	7.54563982004476e-12	5.06452433429373e-11	UP
ENSSSCG00000005981	FBXO32	2.02091101621336	2.10884094697074e-05	6.70463786338595e-05	UP
ENSSSCG00000004457	DOP1A	1.11787828704193	4.52201134166476e-17	4.96438201639283e-16	UP
ENSSSCG00000004452	PRSS35	3.74189983687072	8.92769269479529e-11	5.36213702529927e-10	UP
ENSSSCG00000008117	ZNF2	1.21664541217897	0.00113253264107776	0.00270390026354137	UP
ENSSSCG00000037416	CLIC5	1.30138669847689	0.0199925165605152	0.0370911861243944	UP
ENSSSCG00000008111	NPHP1	1.39463058780978	0.00215755554003739	0.00490706876111909	UP
ENSSSCG00000004109	ZC3H12D	1.59345919982012	0.00233618598337605	0.00527438269673151	UP
ENSSSCG00000003584	THEMIS2	1.15287341633631	0.0057071767556598	0.011937227723692	UP
ENSSSCG00000040286	CYLD	1.39506176531779	5.21501865419135e-19	6.78059840465147e-18	UP
ENSSSCG00000040281	ARMCX3	1.13242565526386	1.94808625072602e-19	2.62202440462858e-18	UP
ENSSSCG00000015311	CYP51A1	1.22194529655436	8.09289734662097e-16	7.90811369977475e-15	UP
ENSSSCG00000023862	MTMR8	1.65477554826005	1.89811248905414e-11	1.21642995808673e-10	UP
ENSSSCG00000023866	ACSF3	1.03379856344715	1.68123451209086e-05	5.41330928720917e-05	UP
ENSSSCG00000023264	IDH1	1.63282367552818	5.48752766519343e-34	2.13169343917129e-32	UP
ENSSSCG00000035446	CAVIN1	1.91363907165065	1.99378974027669e-51	2.22757482044188e-49	UP
ENSSSCG00000015009	POGLUT3	1.16612555303194	6.02894011489732e-14	4.97811438525694e-13	UP
ENSSSCG00000036964	FAM83H	1.9883608290372	1.98713612109578e-07	8.2092910761892e-07	UP
ENSSSCG00000003071	ZNF404	1.98579693323337	6.03553128201768e-05	0.00017920644975417	UP
ENSSSCG00000013874	OCEL1	1.57486176448096	3.56675480373687e-06	1.2595882348861e-05	UP
ENSSSCG00000003694	EMILIN2	1.11157219835881	3.10696314604654e-27	7.63140266903455e-26	UP
ENSSSCG00000037779	CAPN10	1.8143431454773	3.39370317836995e-20	4.81951660595283e-19	UP
ENSSSCG00000038404	SERPINB6	1.4692856666372	3.86237442931977e-25	8.07325780962949e-24	UP
ENSSSCG00000051368	CA9	1.49216454845169	0.00276399038315466	0.00615873254276872	UP
ENSSSCG00000013473	GNA15	2.88756542501324	2.80365124515876e-14	2.35917048549506e-13	UP
ENSSSCG00000003455	FHAD1	2.07713620519391	4.95614002883198e-22	8.0737119824521e-21	UP
ENSSSCG00000003109	TMEM160	1.017560110254	2.72607940699867e-05	8.54911875055024e-05	UP
ENSSSCG00000002983	LGALS13	1.53352535969319	0.0089252543605372	0.0179286135722804	UP
ENSSSCG00000007170	CPXM1	1.33883274901909	3.10265596349657e-16	3.16405747489048e-15	UP
ENSSSCG00000038886	CAGE1	1.80263596824094	0.000573326315799909	0.00144248927465825	UP
ENSSSCG00000016117	CARF	1.89309082708253	1.27676590359722e-07	5.37664093826382e-07	UP
ENSSSCG00000038086	ECHS1	1.11010411840413	8.8340097605414e-18	1.03077054738295e-16	UP
ENSSSCG00000013256	ARHGAP1	1.38189912852313	4.36518912182251e-33	1.62567883961679e-31	UP
ENSSSCG00000038530	TMEM240	1.70514796449383	4.45541241409597e-11	2.75463181821555e-10	UP
ENSSSCG00000009403	ITM2B	1.05923869940797	6.88196055466455e-30	2.03001757015514e-28	UP
ENSSSCG00000007753	RUSF1	1.09762168866628	1.05916551186828e-06	4.00118629184231e-06	UP
ENSSSCG00000039332	SEC16B	3.17817452497962	6.78737674526774e-14	5.57881714902378e-13	UP
ENSSSCG00000025425	FCSK	1.29723738009523	0.000145451413085906	0.000406266391639285	UP
ENSSSCG00000024958	GPR173	1.7798232810683	1.31010817237797e-16	1.3771953102641e-15	UP
ENSSSCG00000031377	U1	1.8147024024515	5.13083061703992e-26	1.14649091221467e-24	UP
ENSSSCG00000031781	PSMB10	1.10231411757854	1.9526871050826e-06	7.1560739337207e-06	UP
ENSSSCG00000007359	LPIN3	1.77968013455683	6.94813215708528e-06	2.3618785267421e-05	UP
ENSSSCG00000002672	MEAK7	1.54815421010534	0.00114679537254295	0.00273588276234973	UP
ENSSSCG00000003926	BTBD19	1.97824675835909	0.000386792650982322	0.0010014883549327	UP
ENSSSCG00000034153	TAF6	1.38677578092999	1.52858478990551e-21	2.40628216615425e-20	UP
ENSSSCG00000002430	EFCAB11	1.68195114462731	9.11019530461099e-05	0.000262834130988834	UP
ENSSSCG00000034159	SNAPIN	1.32242213926845	0.00312436693102061	0.00689238729759483	UP
ENSSSCG00000028406	FOCAD	1.07827417776544	3.34375971997527e-15	3.07409560730962e-14	UP
ENSSSCG00000016684	SCRN1	2.09685792700473	3.43222290223696e-25	7.23402573301196e-24	UP
ENSSSCG00000021466	BMT2	1.50003650998058	1.76875189107386e-26	4.0898338140673e-25	UP
ENSSSCG00000016593	ARF5	1.84577432454566	6.12588191950067e-22	9.92801787338845e-21	UP
ENSSSCG00000015110	DPAGT1	1.23202680125952	4.76263109973435e-09	2.37098649976917e-08	UP
ENSSSCG00000010298	CFAP70	1.87965751105067	5.04869048472253e-08	2.22244481762977e-07	UP
ENSSSCG00000001639	TRERF1	1.2217160788336	1.52850676670642e-09	8.02720379769905e-09	UP
ENSSSCG00000020895	BICDL2	1.64258755063864	0.000138313921042076	0.000387588417490348	UP
ENSSSCG00000010299	ANXA7	1.05522588647293	1.7376500155229e-22	2.95260180968729e-21	UP
ENSSSCG00000006535	PMVK	1.36777227136974	9.31449979044966e-05	0.000268483013366272	UP
ENSSSCG00000021386	PTGR1	1.27488025742932	4.71498658401948e-11	2.90799734358798e-10	UP
ENSSSCG00000036941	AKR1E2	1.86683059652845	0.000266486230054938	0.000710536146661793	UP
ENSSSCG00000024881	TCP11L2	1.10333672518028	8.86178726683815e-13	6.49710013030382e-12	UP
ENSSSCG00000017087	GM2A	2.06856941746806	4.77760442253034e-18	5.71186134795885e-17	UP
ENSSSCG00000035332	ZNF436	1.3282178666104	1.09926776066198e-12	8.0128495833473e-12	UP
ENSSSCG00000017082	SPARC	1.22010522379898	4.0018598240275e-22	6.57857816124313e-21	UP
ENSSSCG00000005650	CERCAM	1.28956509740989	1.52289208376703e-18	1.90928625199193e-17	UP
ENSSSCG00000000583	PYROXD1	1.13859803183115	1.06645020725652e-07	4.54095577288822e-07	UP
ENSSSCG00000021411	HIST1H2BD	2.40633469222174	9.64973274815577e-24	1.81561663107998e-22	UP
ENSSSCG00000001566	RAB44	2.65269998152204	1.85102705526688e-06	6.80921228809566e-06	UP
ENSSSCG00000002428	TTC8	1.27814907995171	5.77443161700391e-08	2.52606372711969e-07	UP
ENSSSCG00000027973	COG4	1.1464152212301	4.54510221208974e-15	4.12226403934145e-14	UP
ENSSSCG00000033768	LAX1	3.20763464444787	7.88908357754564e-10	4.28385721146296e-09	UP
ENSSSCG00000000907	PLXNC1	1.88669850283412	1.53332475386183e-35	6.88904804893438e-34	UP
ENSSSCG00000011936	ZBED2	1.17450774654455	4.73735267632954e-11	2.91887691893442e-10	UP
ENSSSCG00000006495	SEMA4A	1.91981013404608	0.00150846106138151	0.00352411563655469	UP
ENSSSCG00000016894	ARL15	1.14399893102751	6.88058042331224e-05	0.00020229931961881	UP
ENSSSCG00000028397	TMEM106C	1.22653885889244	7.96474974239813e-14	6.49160526131545e-13	UP
ENSSSCG00000008376	COMMD1	1.32704083210305	1.09627926698165e-13	8.80440569061283e-13	UP
ENSSSCG00000008239	CAPG	1.47767640255558	9.86649218832659e-29	2.69620051683167e-27	UP
ENSSSCG00000002424	SPATA7	1.43086250293462	0.000804612789661354	0.00197784977988212	UP
ENSSSCG00000022429	KAZALD1	2.53761978873382	5.55746304140889e-07	2.17083579528048e-06	UP
ENSSSCG00000027806	SAMHD1	1.07228135228086	4.75685920759441e-13	3.59612859256763e-12	UP
ENSSSCG00000034418	CREBL2	1.7123154038079	9.88092781885955e-26	2.16198810594631e-24	UP
ENSSSCG00000010534	HPS1	1.67714035038969	4.10295801464877e-12	2.82904669224144e-11	UP
ENSSSCG00000010532	LOXL4	1.44394786967722	3.5668395770162e-35	1.54216950889827e-33	UP
ENSSSCG00000005533	PTGS1	1.97022959156838	9.58115115142633e-23	1.65928715070998e-21	UP
ENSSSCG00000032648	RBL2	1.49807203409257	1.99643127467904e-11	1.27555388880682e-10	UP
ENSSSCG00000004718	TTBK2	1.02557800581549	0.000157488506550285	0.000437949866783558	UP
ENSSSCG00000000695	IFFO1	1.08068336238546	0.00101721150885605	0.00244864689647916	UP
ENSSSCG00000025492	NUDT13	1.07494901745144	0.000203359480491065	0.000554516941943778	UP
ENSSSCG00000006398	SLAMF8	2.56682403643522	0.000340191906326302	0.000889770627174139	UP
ENSSSCG00000005627	AK1	2.93841238745424	9.57504761002992e-10	5.1484231719177e-09	UP
ENSSSCG00000005626	FPGS	1.13707647882339	0.00940219394332453	0.0187746929388294	UP
ENSSSCG00000015638	RHEX	2.23063330593125	0.00174402067793899	0.00402601226165291	UP
ENSSSCG00000012917	ANKRD13D	1.10308618635104	0.000856108801183557	0.00209302355053106	UP
ENSSSCG00000007914	METTL22	1.2677961889311	0.000106649276571713	0.000304694980022149	UP
ENSSSCG00000025315	SEPSECS	1.17445644042361	1.52453344585314e-06	5.65263869424256e-06	UP
ENSSSCG00000007669	GNB2	1.04000745100381	3.74299245109546e-18	4.54377689375771e-17	UP
ENSSSCG00000023380	ISCU	1.03502582269357	6.76407589214476e-14	5.56328717513535e-13	UP
ENSSSCG00000022256	DEPP1	1.45922828467583	0.000140924343597973	0.000394669440533365	UP
ENSSSCG00000026044	FDFT1	1.17184621906256	2.41871447262629e-13	1.8861192227861e-12	UP
ENSSSCG00000031915	ZFP82	1.44023090136922	0.000238206076552504	0.00064081647485092	UP
ENSSSCG00000005842	TMEM141	1.70601554899736	0.00141631215054322	0.00332050898804236	UP
ENSSSCG00000037544	U1	1.47445187288455	0.0271025561149199	0.0484952030957023	UP
ENSSSCG00000014302	CDKL3	1.78804526354349	3.47562775460325e-07	1.39256745166188e-06	UP
ENSSSCG00000014303	JADE2	1.07251069852776	4.61917912666629e-10	2.57584525062553e-09	UP
ENSSSCG00000005444	TMEM245	1.16055635994745	7.57517365123116e-21	1.13988757266738e-19	UP
ENSSSCG00000004912	SEC11C	1.52944412669166	2.24138830852008e-24	4.41459085726459e-23	UP
ENSSSCG00000004469	LCA5	1.56557540835989	0.00487076509106894	0.0103386139044489	UP
ENSSSCG00000005997	COL14A1	1.47829308364947	9.27002304570471e-30	2.72172188260516e-28	UP
ENSSSCG00000004465	BCKDHB	1.22353481780601	0.0202646167576247	0.037507812133853	UP
ENSSSCG00000004466	TTK	1.17620486745255	7.134536219009e-05	0.00020932725950497	UP
ENSSSCG00000003590	PTPRU	1.63745562690249	7.25473620663692e-27	1.73797048593532e-25	UP
ENSSSCG00000036169	UMAD1	1.16194119263418	0.000937654506611925	0.0022734565288987	UP
ENSSSCG00000011662	COPB2	1.00584051399029	2.0252135617974e-27	5.03313409797091e-26	UP
ENSSSCG00000030460	ARHGEF6	1.00741794520399	1.67381485218672e-14	1.44245136579231e-13	UP
ENSSSCG00000037307	PRC1	1.3241315524629	3.12061168001542e-14	2.62127228610743e-13	UP
ENSSSCG00000004489	EEF1A1	1.15882003713455	5.65189877405598e-44	4.35092817210102e-42	UP
ENSSSCG00000015540	MR1	1.37986720595468	0.000546497059970078	0.00138073351653437	UP
ENSSSCG00000015010	EXPH5	1.40726640494842	0.00382826936784729	0.00829162819850266	UP
ENSSSCG00000015792	LRP2BP	1.01258776063628	0.00384101013688774	0.00831066889086678	UP
ENSSSCG00000036494	ERG28	1.59982770651315	7.93014451345299e-19	1.01953232670411e-17	UP
ENSSSCG00000023498	HSPB6	1.93321187537984	4.966784658356e-37	2.43990880590445e-35	UP
ENSSSCG00000013227	KBTBD4	1.00074393633485	9.38528538851276e-12	6.20687417653083e-11	UP
ENSSSCG00000023924	PDE1A	1.60727233788804	1.0632217537398e-11	6.99123679216928e-11	UP
ENSSSCG00000033585	DUSP23	1.09534583710391	0.0263404866319242	0.0473378852281912	UP
ENSSSCG00000008963	AREG	1.39923120946843	1.1689662027978e-22	2.00518998781551e-21	UP
ENSSSCG00000004713	TGM5	1.28118737975633	0.0120377898894091	0.0235331522690911	UP
ENSSSCG00000004716	TMEM62	1.55757667565788	0.00152487786857677	0.00355851813138294	UP
ENSSSCG00000025097	TMEM61	1.29558070107282	6.78703194222195e-05	0.000199874686891888	UP
ENSSSCG00000036824	AVPI1	1.82090384236293	1.43814660415252e-40	8.68736884087349e-39	UP
ENSSSCG00000016164	IKZF2	1.1058433788268	1.61123469089804e-05	5.20251610552115e-05	UP
ENSSSCG00000017948	EFNB3	1.65488112024466	0.0123156833084368	0.0239798738076826	UP
ENSSSCG00000012317	GSPT2	1.51063747071706	8.82007728497115e-16	8.56565197867391e-15	UP
ENSSSCG00000012318	MAGED1	2.04573644598477	7.97978873227604e-84	2.72283331743203e-81	UP
ENSSSCG00000008819	TXK	2.28655377179758	0.00143194410123816	0.00335591131949726	UP
ENSSSCG00000009430	AKAP11	1.1207998621994	1.84457882278589e-13	1.45095374689545e-12	UP
ENSSSCG00000002530	CINP	1.17720096836845	1.90706027887196e-14	1.6323143064921e-13	UP
ENSSSCG00000038439	PRX	1.2294649044262	0.00334723494706409	0.00733915269306775	UP
ENSSSCG00000010923	UBE2T	1.36751009897554	9.19577923006966e-06	3.06971741881622e-05	UP
ENSSSCG00000022726	RHOD	1.06746364596258	5.1579024178115e-08	2.26893791027422e-07	UP
ENSSSCG00000022725	FLOT1	1.68117373847667	2.91738560723006e-23	5.31486194679358e-22	UP
ENSSSCG00000007463	PTGIS	1.96126858114281	1.06190742291891e-42	7.48971017561524e-41	UP
ENSSSCG00000005828	EGFL7	1.42064435488456	1.24186732608474e-05	4.06707522485598e-05	UP
ENSSSCG00000003931	KIF2C	1.39130513058324	1.1377202576275e-07	4.83367202884622e-07	UP
ENSSSCG00000036521	TNFSF13	1.44611013879028	4.72617455443851e-06	1.64555857004374e-05	UP
ENSSSCG00000007437	SLC12A5	2.00710708935967	1.84811029087388e-14	1.58508100694855e-13	UP
ENSSSCG00000024388	BNIP3	1.27535971255653	1.68748992615078e-27	4.21872481537695e-26	UP
ENSSSCG00000001993	TGM1	1.15644458477999	0.00244268193374283	0.00549614318543989	UP
ENSSSCG00000025561	VASN	1.50828709239669	5.93165250850559e-24	1.12951904856536e-22	UP
ENSSSCG00000006527	KRTCAP2	1.03837536831137	3.76002725833093e-12	2.6082606668367e-11	UP
ENSSSCG00000006520	SCAMP3	1.59455652081405	1.37848007778312e-30	4.23438223406615e-29	UP
ENSSSCG00000036954	MORN4	1.98289650425859	5.99557092931073e-13	4.47364556634444e-12	UP
ENSSSCG00000006529	SLC50A1	1.36347414387227	2.52378076461415e-05	7.93197215664766e-05	UP
ENSSSCG00000032819	QPCTL	1.01173682096792	1.53871018635955e-09	8.0740715306689e-09	UP
ENSSSCG00000002712	LDHD	1.25188565033635	0.00330605818324208	0.00725769162987849	UP
ENSSSCG00000016782	OTULINL	1.508590254975	5.40572420355854e-11	3.31458319912223e-10	UP
ENSSSCG00000028706	MORN1	1.77358498553955	0.00164907692372974	0.00382502226016682	UP
ENSSSCG00000001571	MTCH1	1.19133917471962	7.92496722164745e-17	8.53692074857501e-16	UP
ENSSSCG00000027946	MVP	1.71077123431945	6.79128437502713e-51	7.455649150845e-49	UP
ENSSSCG00000017565	SPATA20	1.39663536539555	7.03854041447235e-12	4.74941596647319e-11	UP
ENSSSCG00000017561	ABCC3	1.81450415105294	2.96429836387426e-37	1.49100664716783e-35	UP
ENSSSCG00000034314	LSM4	1.11938424163072	1.79102887951606e-16	1.86104852706916e-15	UP
ENSSSCG00000031236	GLIPR2	1.35760922706579	1.85676470452722e-19	2.50177741671891e-18	UP
ENSSSCG00000000488	MDM2	1.07131529109548	2.58262876536846e-22	4.30154197398111e-21	UP
ENSSSCG00000011928	CCDC80	1.32949442095652	4.34360308191324e-27	1.05457670979143e-25	UP
ENSSSCG00000028671	CEL	1.23984974814469	0.0151494033071157	0.0289395092680186	UP
ENSSSCG00000005340	CCIN	2.06707929606687	0.000384625412499188	0.000996490012887799	UP
ENSSSCG00000017893	PIMREG	1.38013509544831	0.000273095602164329	0.000726012208322732	UP
ENSSSCG00000014326	KIF20A	2.8109085712914	1.66032770209564e-35	7.43320469466576e-34	UP
ENSSSCG00000012691	ZNF449	1.05673162657804	2.26757175600772e-06	8.23119419769911e-06	UP
ENSSSCG00000017415	TTC25	1.38136867385818	0.00293725726421373	0.00651834645116863	UP
ENSSSCG00000018007	MYH3	1.17712251084061	0.00236762271190148	0.00534249092721289	UP
ENSSSCG00000001906	CYP1A1	2.35811715110689	1.23871437198158e-08	5.84626876495981e-08	UP
ENSSSCG00000017519	MRPL10	1.01125690548842	8.58477052081003e-07	3.27737308210543e-06	UP
ENSSSCG00000035212	KLF6	1.49169526518123	4.75065920251187e-38	2.48867520463537e-36	UP
ENSSSCG00000009768	TCTN2	2.06915438924949	1.72730492937014e-06	6.37265480224958e-06	UP
ENSSSCG00000000396	STAT2	1.1025000805915	5.400100081541e-16	5.36009309221073e-15	UP
ENSSSCG00000015801	TLR3	1.40490454002852	3.60984181647413e-07	1.44359369442464e-06	UP
ENSSSCG00000008368	UGP2	1.19505762408831	9.6001288201235e-27	2.27395171395983e-25	UP
ENSSSCG00000041935	HSPB7	1.33467065444156	1.59495965984462e-08	7.43862789269978e-08	UP
ENSSSCG00000040401	EEF1A2	1.23489416229353	4.3079447138137e-19	5.64188817550809e-18	UP
ENSSSCG00000003359	TPRG1L	1.10299446535839	1.25042938439903e-11	8.14585705781102e-11	UP
ENSSSCG00000014046	ZNF346	1.51878893487615	0.000405143106994818	0.00104471644726503	UP
ENSSSCG00000032673	ZFP14	1.71723980862254	0.000505158858220652	0.00128581261795075	UP
ENSSSCG00000005056	DLGAP5	1.79745270498586	2.87960048361929e-16	2.95328644237965e-15	UP
ENSSSCG00000034407	AMN1	1.11784427451884	1.21276488689923e-07	5.12421576208257e-07	UP
ENSSSCG00000005055	LGALS3	2.22104869884907	8.14345574168146e-55	1.14234587487476e-52	UP
ENSSSCG00000034308	LRMDA	1.66150278716674	0.00202418169419215	0.00463042107069684	UP
ENSSSCG00000009354	CCNA1	1.73247324294383	0.00498982523671703	0.0105557211148714	UP
ENSSSCG00000007926	SEC14L5	4.11116282938202	3.86607267390067e-31	1.24831630455233e-29	UP
ENSSSCG00000007927	PPL	3.18603824468882	5.24416115575399e-63	1.00314446350597e-60	UP
ENSSSCG00000035684	TMED10	1.17115920337059	8.27897724347351e-35	3.48406958996177e-33	UP
ENSSSCG00000017053	NIPAL4	1.23434766970501	1.06570437777774e-08	5.07526132381894e-08	UP
ENSSSCG00000026618	CAVIN2	1.63202991882611	3.11978388531502e-08	1.40769376526455e-07	UP
ENSSSCG00000011251	MYD88	1.13855343008071	4.72937597620096e-18	5.66493090128436e-17	UP
ENSSSCG00000003825	CYP2J34	1.40208634590081	0.00283157653328353	0.00629599396490042	UP
ENSSSCG00000011256	SLC22A13	2.11281286929403	0.00281440966036671	0.00626332172520046	UP
ENSSSCG00000008122	ADRA2B	1.53971637271002	0.0201809863731742	0.0373804215025417	UP
ENSSSCG00000017758	SPAG5	2.80782410576797	9.45365683453047e-06	3.14914030437855e-05	UP
ENSSSCG00000004672	GATM	1.24981903556634	0.000701427193293282	0.00174184073865612	UP
ENSSSCG00000010254	TACR2	2.39970007908229	5.18469594810752e-09	2.56693279783755e-08	UP
ENSSSCG00000010252	HKDC1	1.47241823844332	0.00661840203271279	0.0136331090982214	UP
ENSSSCG00000010817	LYPLAL1	1.99308724116435	8.81744942347609e-12	5.8558810610934e-11	UP
ENSSSCG00000036007	MFAP4	1.15716530425072	6.91615869237249e-17	7.48213397525302e-16	UP
ENSSSCG00000033074	ZCCHC24	1.77780503150855	1.44365754566119e-59	2.56706711464402e-57	UP
ENSSSCG00000031903	TNNT3	1.78392728170853	0.00368675933321064	0.00801676482634934	UP
ENSSSCG00000011071	THNSL1	1.74319441994072	2.98512794631249e-06	1.0652131238608e-05	UP
ENSSSCG00000005272	NMRK1	1.36865813728186	0.00193790535780507	0.00444675665981261	UP
ENSSSCG00000015793	UFSP2	1.75292078728358	5.56462876193323e-22	9.05327810817101e-21	UP
ENSSSCG00000004908	LMAN1	1.23119258305984	5.20810048040802e-28	1.35292733673151e-26	UP
ENSSSCG00000009283	TNFRSF19	1.68130937157234	7.05835501993084e-07	2.72013834330363e-06	UP
ENSSSCG00000014310	CXCL14	1.60711792582847	0.000124830928978928	0.000353281882618014	UP
ENSSSCG00000004901	PIGN	2.31355231358652	4.53052040141092e-21	6.89961641348767e-20	UP
ENSSSCG00000023665	FBXO25	1.46113294453549	7.34689865639898e-07	2.82529989451834e-06	UP
ENSSSCG00000035594	PRSS22	1.92986787611715	5.7399195906562e-17	6.24711076138228e-16	UP
ENSSSCG00000025754	ZGLP1	2.20531794704214	0.000999653444583512	0.00241173795869804	UP
ENSSSCG00000025618	TAP1	1.06836393841939	2.63504663085304e-15	2.44793699150255e-14	UP
ENSSSCG00000012416	CHIC1	1.01346201568302	0.000108688282470692	0.000309959242419806	UP
ENSSSCG00000023807	ACO1	1.71097573393638	6.53259556031367e-42	4.34073783941895e-40	UP
ENSSSCG00000023618	FRMD7	2.37483603840608	8.571267553163e-13	6.29873415941111e-12	UP
ENSSSCG00000004875	CYB5A	2.24157909572215	1.26564135541355e-29	3.64811007125481e-28	UP
ENSSSCG00000023247	OPTN	1.59447588645589	2.44969390158387e-35	1.08517142131566e-33	UP
ENSSSCG00000006136	RMDN1	1.61942325607647	1.58583320080456e-10	9.28624497224375e-10	UP
ENSSSCG00000007287	GSS	1.2863637832942	1.99080376158252e-22	3.35118633199724e-21	UP
ENSSSCG00000013302	CAT	1.96391678620087	7.27627128221412e-49	6.90698683744009e-47	UP
ENSSSCG00000031053	S100A1	1.58955500303137	0.00107401934428952	0.00257540251123555	UP
ENSSSCG00000023976	DCP1B	2.64052812947544	4.47905611515979e-09	2.2395280575799e-08	UP
ENSSSCG00000004704	PPIP5K1	1.41537569931596	0.000567254952529622	0.00142888942052803	UP
ENSSSCG00000022282	BDH2	2.36421256997587	5.81143613371347e-18	6.90210547395415e-17	UP
ENSSSCG00000003439	DHRS3	1.74576154149	0.000504390588409804	0.00128411598682673	UP
ENSSSCG00000035629	CA5A	1.8065085483893	0.00571519187278113	0.01195201215734	UP
ENSSSCG00000006524	THBS3	1.26210678207498	1.20753544271524e-12	8.76661010021844e-12	UP
ENSSSCG00000039616	ZBTB25	1.10447712194856	6.01355011425596e-06	2.06644175809694e-05	UP
ENSSSCG00000035533	ANKRD39	1.09142963330271	1.0395486419551e-10	6.19655410985982e-10	UP
ENSSSCG00000013235	MADD	1.85880225178251	0.000942654766270917	0.00228426418890026	UP
ENSSSCG00000013237	SPI1	2.16572591411238	7.97748908361207e-06	2.68360777193185e-05	UP
ENSSSCG00000034087	TNFSF15	4.54552727840172	7.45389663638586e-47	6.44557842701174e-45	UP
ENSSSCG00000038512	U3	5.3624111341049	3.48591700416865e-15	3.19605680302318e-14	UP
ENSSSCG00000038514	DDAH2	1.03015388811866	1.99935884777745e-09	1.03577781917071e-08	UP
ENSSSCG00000003543	NIPAL3	1.45240160581568	7.18304410463535e-10	3.92409917010045e-09	UP
ENSSSCG00000022758	PECR	1.29879887724254	5.15130980415828e-11	3.16473412542571e-10	UP
ENSSSCG00000008957	AMCF-II	1.53865956583526	9.40078168871184e-20	1.28865221302917e-18	UP
ENSSSCG00000003549	LDLRAP1	1.66999984759701	2.41336017934799e-38	1.27483984369324e-36	UP
ENSSSCG00000046808	PCDHGA6	1.01384888137464	0.0206780437696556	0.0381388316423523	UP
ENSSSCG00000006732	TRIM45	1.38918002519025	1.83865575029081e-08	8.50605674145162e-08	UP
ENSSSCG00000033506	KCTD21	1.20821142635815	0.00382982217038521	0.00829356859367295	UP
ENSSSCG00000003949	CDC20	1.38178296878353	1.67944894186316e-08	7.80097236608625e-08	UP
ENSSSCG00000029420	ZNF569	2.14632924876215	1.4272317895062e-12	1.0296457910009e-11	UP
ENSSSCG00000039109	MTERF2	1.25882374522265	5.80575448883185e-07	2.26227316115747e-06	UP
ENSSSCG00000002140	KLHL33	1.84149980020497	0.00614021353164215	0.01275003221003	UP
ENSSSCG00000002142	TEP1	1.0804048001703	7.39039858354048e-20	1.02531628700218e-18	UP
ENSSSCG00000039770	SLC6A9	1.43796745369528	2.20803896971146e-24	4.35570187384487e-23	UP
ENSSSCG00000002144	CCNB1IP1	1.38830728847306	3.60726116211337e-14	3.01600477958154e-13	UP
ENSSSCG00000022676	OPHN1	1.7949347179916	1.18631291200413e-08	5.61574822424151e-08	UP
ENSSSCG00000015494	ZBTB37	1.03009434792393	3.21392377910807e-06	1.14201485255388e-05	UP
ENSSSCG00000002658	FOXL1	1.34824567289913	0.000350197623930344	0.000914046930353648	UP
ENSSSCG00000006648	CTSS	1.75186125824538	2.60497612583896e-24	5.10680490508026e-23	UP
ENSSSCG00000039358	SUSD5	2.1687721141245	0.000635850735727529	0.00158899753336502	UP
ENSSSCG00000040182	RHBDD2	1.52299519130719	1.08147928056995e-16	1.14640435912641e-15	UP
ENSSSCG00000033444	SPC24	1.58621783014189	3.09006168084236e-23	5.60517654032109e-22	UP
ENSSSCG00000033996	U1	1.47445187288455	0.0271025561149199	0.0484952030957023	UP
ENSSSCG00000030247	EPM2AIP1	2.05352675205774	3.69608703090017e-33	1.3887827013427e-31	UP
ENSSSCG00000002706	ADAT1	1.05822488530838	0.00789507852555305	0.0160378706975233	UP
ENSSSCG00000030241	TSC22D3	2.53927964704365	1.39147028910982e-37	7.0269249600046e-36	UP
ENSSSCG00000032804	BORCS5	1.09329294736994	0.00628944622123728	0.013023117504022	UP
ENSSSCG00000024403	PRRT1	1.61254114198397	0.0177612627912891	0.0333795665147427	UP
ENSSSCG00000028266	TMUB1	1.17800467404397	8.75672979208498e-08	3.77574158555577e-07	UP
ENSSSCG00000021270	THAP2	1.02773377527102	9.05256481029087e-09	4.35053790368946e-08	UP
ENSSSCG00000044084	BORCS8	1.13611201027502	7.44562764229591e-05	0.000217695805891584	UP
ENSSSCG00000014151	CETN3	1.20327987613909	8.88398497955881e-07	3.38546062079475e-06	UP
ENSSSCG00000027956	SSH3	1.11168530687415	1.92214108490946e-10	1.11641166207472e-09	UP
ENSSSCG00000034328	SP7	2.55600018992386	3.89964348490777e-11	2.43246042475102e-10	UP
ENSSSCG00000028606	ZBTB7B	1.15406536226898	2.13734486985705e-15	1.99881325792187e-14	UP
ENSSSCG00000034321	TP53INP1	1.31255656867079	3.93167880709807e-23	7.06080297860785e-22	UP
ENSSSCG00000000709	PLEKHG6	1.44298246636595	0.00117107611661415	0.00278906545411311	UP
ENSSSCG00000008480	MORN2	2.15656330420736	1.05399817682104e-17	1.22192166963872e-16	UP
ENSSSCG00000021508	SLC35G2	1.96673381794629	0.00374486970466384	0.00813191950832145	UP
ENSSSCG00000000700	ACRBP	1.34968714958127	0.00101727944332936	0.00244864689647916	UP
ENSSSCG00000008488	RMDN2	1.33175473169072	0.00119139298310653	0.00283371070303692	UP
ENSSSCG00000017429	P3H4	1.08388381688903	8.35944575065148e-18	9.79334206656665e-17	UP
ENSSSCG00000001814	IQGAP1	1.50836061292706	4.2973379464852e-62	7.97851346681994e-60	UP
ENSSSCG00000016406	ESYT2	1.12177813512471	9.81933948779488e-31	3.08380997595548e-29	UP
ENSSSCG00000000811	PCED1B	1.54727335031362	0.00288802883473872	0.00641360845005741	UP
ENSSSCG00000001818	FES	1.12467033370202	2.03990304238639e-09	1.05548261926755e-08	UP
ENSSSCG00000000361	CD63	1.35408321165864	2.0096676135232e-24	3.98305394359974e-23	UP
ENSSSCG00000015798	ANKRD37	1.18931565767052	0.00151549328402159	0.00353858012035741	UP
ENSSSCG00000010332	PLAC9	1.89378865679979	3.6473217669413e-35	1.57158489104553e-33	UP
ENSSSCG00000026349	ALDH3B2	1.65614568394716	0.00411457749255525	0.00886006154588266	UP
ENSSSCG00000035263	U1	1.47445187288455	0.0271025561149199	0.0484952030957023	UP
ENSSSCG00000015819	PLPP5	1.53499619767253	5.66254997450402e-07	2.20919942608508e-06	UP
ENSSSCG00000005287	PSAT1	1.79665414777329	1.21522177825236e-56	1.84845481330555e-54	UP
ENSSSCG00000008396	CCDC85A	2.14607007146983	4.8870836652611e-05	0.000147292048301202	UP
ENSSSCG00000026994	ADAMTS10	1.01927835134467	1.33176107983525e-09	7.03787510796151e-09	UP
ENSSSCG00000000146	MYH11	1.02302389768178	0.00173932089342392	0.00401589727130157	UP
ENSSSCG00000006555	C1orf189	1.91304065795266	0.00226130583823423	0.00511905795368606	UP
ENSSSCG00000010797	EARS2	1.69160751549084	5.40467208426476e-16	5.36009309221073e-15	UP
ENSSSCG00000010026	PIK3IP1	2.50010756979722	4.6861104282725e-22	7.65357621693923e-21	UP
ENSSSCG00000028282	SLC1A4	1.1144956361109	7.55455591543356e-12	5.06781447568271e-11	UP
ENSSSCG00000008557	EMILIN1	1.27131574216459	6.53064327174645e-22	1.05433978651917e-20	UP
ENSSSCG00000028284	KCND1	1.36329886685807	8.27383940279246e-05	0.000240242001978507	UP
ENSSSCG00000006666	SV2A	2.22084453601731	0.000568638199021453	0.00143208802366763	UP
ENSSSCG00000031114	SLFN14	4.49712477698099	2.73251607606545e-15	2.52732713995064e-14	UP
ENSSSCG00000031115	CD70	1.15386610649274	0.000141034545635935	0.000394715393184145	UP
ENSSSCG00000032660	TMEM35B	1.55630592672704	0.00090807973642921	0.00220623128210008	UP
ENSSSCG00000008558	AGBL5	1.43819347514464	8.24728111582011e-09	3.97867497467439e-08	UP
ENSSSCG00000000038	CYB5R3	1.1479877573223	1.70909692252975e-18	2.1321490757844e-17	UP
ENSSSCG00000007930	MGRN1	1.06969597976498	3.70251965852728e-14	3.0936009721315e-13	UP
ENSSSCG00000000033	TSPO	1.35532799307859	1.14290576742881e-27	2.88583706275774e-26	UP
ENSSSCG00000009361	POSTN	1.94091950840655	1.32858178871787e-44	1.0418226759356e-42	UP
ENSSSCG00000000035	TTLL1	1.40293620382738	8.60132235819925e-16	8.35963778077487e-15	UP
ENSSSCG00000005607	RALGPS1	1.3829880603133	0.00382681883763361	0.00829133135835325	UP
ENSSSCG00000005608	ANGPTL2	2.43038020405497	9.41593505158271e-74	2.58426478317895e-71	UP
ENSSSCG00000003603	COL16A1	1.07498625038457	2.66846426871881e-15	2.47715892592463e-14	UP
ENSSSCG00000019309	SNORA63	1.45072435913046	5.22805466862281e-05	0.000156630731351122	UP
ENSSSCG00000040989	GPRC5C	1.70488121402536	1.76058554720111e-13	1.38834431813954e-12	UP
ENSSSCG00000004390	SESN1	1.24344798564219	2.00015148742694e-07	8.25765615721554e-07	UP
ENSSSCG00000023653	GLIS2	1.08993028029194	6.17080083353294e-20	8.6562622803726e-19	UP
ENSSSCG00000011447	SPCS1	1.04466005961389	3.9870733580462e-16	4.02372511153743e-15	UP
ENSSSCG00000011448	GLT8D1	1.28523875174727	1.70953021341303e-17	1.95851351582028e-16	UP
ENSSSCG00000009940	ALKBH2	1.9892523834769	3.38611486645401e-05	0.000104907239727563	UP
ENSSSCG00000015368	HDAC9	1.00090591958922	0.00120957740265839	0.00287263256368738	UP
ENSSSCG00000011686	SLC9A9	1.19895594009622	2.27266516433066e-07	9.32176663407231e-07	UP
ENSSSCG00000011042	RSU1	1.24082362116586	3.80527131116401e-24	7.33458783258712e-23	UP
ENSSSCG00000023728	TECTA	1.43062738226349	9.3196713411672e-14	7.5375304729171e-13	UP
ENSSSCG00000037568	RAB43	1.11548393355161	2.23135873947313e-11	1.41776064850771e-10	UP
ENSSSCG00000015567	NIBAN1	1.27219706350052	1.47921528331972e-34	6.10297155291224e-33	UP
ENSSSCG00000012062	TTC3	1.14551030709004	1.7737558823971e-18	2.20844852221532e-17	UP
ENSSSCG00000008018	MAPK8IP3	1.78907063828848	2.03973809467084e-22	3.424427319843e-21	UP
ENSSSCG00000004022	RPS6KA2	1.22338184739982	6.16411196255899e-17	6.69148009693097e-16	UP
ENSSSCG00000003049	ERFL	2.02388103637392	0.000715011380777007	0.00177382957011391	UP
ENSSSCG00000012882	TESMIN	1.448928111534	0.0028832283983247	0.00640520121922388	UP
ENSSSCG00000008014	NUBP2	1.34960492001203	2.52775200131101e-05	7.94247611163551e-05	UP
ENSSSCG00000031082	ATP13A2	1.13709072743427	9.34135066422462e-09	4.47909427025582e-08	UP
ENSSSCG00000012532	TCEAL1	1.13072144377132	0.000902465166992983	0.00219361238607748	UP
ENSSSCG00000015215	CHEK1	1.04698189600555	4.54349445266208e-13	3.43894589117858e-12	UP
ENSSSCG00000015214	STT3A	1.07913051921827	7.10663920882054e-28	1.81622105286152e-26	UP
ENSSSCG00000012249	CXorf38	1.8095521538453	1.81684361643718e-16	1.88476998007555e-15	UP
ENSSSCG00000004388	ARMC2	2.56016252484717	1.80916842977732e-14	1.5527363307912e-13	UP
ENSSSCG00000028858	FAM83C	1.51588777917934	0.00552132157243239	0.0115849567644937	UP
ENSSSCG00000003429	CLCN6	1.59018118214331	3.89313423005952e-08	1.73379342315205e-07	UP
ENSSSCG00000023837	WFDC1	1.28805028729676	7.21798076894159e-20	1.00249732901966e-18	UP
ENSSSCG00000023349	ZNF768	1.12120395301841	4.26132598804862e-14	3.54642324318483e-13	UP
ENSSSCG00000013936	NDUFA13	1.59921198223087	5.93780011435906e-29	1.64036600533442e-27	UP
ENSSSCG00000003139	BCAT2	1.01040089297748	3.39789291606253e-09	1.71799751963514e-08	UP
ENSSSCG00000040366	ADAMTSL1	2.23973679913904	2.15276744249839e-47	1.91399218039029e-45	UP
ENSSSCG00000013244	PACSIN3	1.03056404219306	1.1164272512292e-09	5.94219816474224e-09	UP
ENSSSCG00000010664	ENO4	1.45671372452095	0.0151674081078512	0.0289651380065983	UP
ENSSSCG00000005707	FIBCD1	2.7236432974964	2.53154681484554e-06	9.13948485485415e-06	UP
ENSSSCG00000002390	ANGEL1	1.88573180620842	1.27049796602564e-13	1.01583513749675e-12	UP
ENSSSCG00000002396	GSTZ1	1.03836193568573	2.25366699270504e-05	7.13267929426746e-05	UP
ENSSSCG00000027013	CYP4F8	2.56954683422246	1.24985412551395e-07	5.27034346513479e-07	UP
ENSSSCG00000002398	TMEM63C	2.75353192016017	3.17830034899615e-05	9.88813255447916e-05	UP
ENSSSCG00000008832	LRRC66	1.36081595919217	5.20312368369372e-19	6.77210685635393e-18	UP
ENSSSCG00000001780	FAH	1.55003818643786	1.0431571352675e-10	6.21512922734882e-10	UP
ENSSSCG00000003553	MTFR1L	1.04488300986155	7.43288930658517e-15	6.5899036162667e-14	UP
ENSSSCG00000007149	SPEF1	1.62195670237973	0.00383173858624434	0.00829487305406974	UP
ENSSSCG00000025363	SNX17	1.25299808892447	2.93576928132437e-16	3.00844863447404e-15	UP
ENSSSCG00000007636	GJC3	1.40738005897292	0.000183735797948942	0.000505043424582058	UP
ENSSSCG00000022741	PDGFRB	1.45733015994994	1.15629336851886e-30	3.59561669397797e-29	UP
ENSSSCG00000020906	GHSR	2.04240124369087	0.000129605658832143	0.000365810740611627	UP
ENSSSCG00000030626	ALDH1L1	1.94989511206071	0.000542296373633887	0.00137149273179644	UP
ENSSSCG00000036975	PSRC1	1.54619340812505	1.13899092222762e-08	5.40186340838608e-08	UP
ENSSSCG00000029411	CAPN2	1.21751058929632	1.00744616257357e-46	8.59392419087253e-45	UP
ENSSSCG00000009565	GAS6	2.10752386320348	4.22527012178384e-49	4.04916908254159e-47	UP
ENSSSCG00000039763	CMBL	1.99212514181077	1.19209465269866e-06	4.47522895935787e-06	UP
ENSSSCG00000021084	S100A6	1.78585963399784	2.59817375659269e-12	1.8233431727061e-11	UP
ENSSSCG00000039348	H1-0	1.08761915607623	1.40519893673143e-21	2.2231374155682e-20	UP
ENSSSCG00000031612	ZNF570	1.21847881149172	7.28208480073424e-06	2.46412009137684e-05	UP
ENSSSCG00000006099	ESRP1	1.75500713085204	1.68166331855705e-05	5.41330938214756e-05	UP
ENSSSCG00000021569	MMP25	1.17819525725584	9.83441267546146e-09	4.70122908094286e-08	UP
ENSSSCG00000029070	PAFAH1B3	1.1007913630258	0.00223601678997728	0.00506999137454438	UP
ENSSSCG00000033982	ZNHIT1	1.40011901556609	8.82795967535225e-21	1.31741123996835e-19	UP
ENSSSCG00000028076	ZBTB7C	1.34481465991608	1.28399877464786e-20	1.8981832002259e-19	UP
ENSSSCG00000030538	CDCP2	1.1582849524486	0.00211460247852189	0.0048163190134113	UP
ENSSSCG00000025981	SLC38A5	1.81191163044977	8.63076153213555e-39	4.69669673893152e-37	UP
ENSSSCG00000001773	TMED3	1.3110966385579	4.22252103662836e-25	8.78242637354745e-24	UP
ENSSSCG00000025210	ATG10	2.60075172232007	1.92417137194663e-06	7.05771748135567e-06	UP
ENSSSCG00000028471	DTHD1	1.6907958395803	0.00584159362577725	0.0121901024008988	UP
ENSSSCG00000006475	IQGAP3	2.18456951119646	7.97819163061954e-16	7.80811390205982e-15	UP
ENSSSCG00000006472	CRABP2	1.82710659959695	2.51695569377791e-34	1.01199253611293e-32	UP
ENSSSCG00000031572	MFF	1.19857350644089	2.26246199248865e-20	3.26814446855483e-19	UP
ENSSSCG00000016322	ACKR3	1.19899222067809	1.33166296595983e-11	8.65272513908536e-11	UP
ENSSSCG00000031576	TMEM42	1.10130804972129	6.63660920158193e-06	2.26635626643148e-05	UP
ENSSSCG00000006386	COPA	1.05813800799563	4.51168079695114e-34	1.76894316961205e-32	UP
ENSSSCG00000030328	NDUFB10	1.04433363918586	1.3605851823277e-12	9.83813741517022e-12	UP
ENSSSCG00000027928	TMEM9	1.5367392369849	6.67519448439693e-06	2.27718298640829e-05	UP
ENSSSCG00000017540	HOXB5	1.04667873280388	0.0106097809308743	0.02098190542799	UP
ENSSSCG00000039012	GLTP	1.5379721282984	1.92443782614604e-12	1.37443279406305e-11	UP
ENSSSCG00000031216	HS3ST6	1.26606690253885	0.00208929055742288	0.00476468448111704	UP
ENSSSCG00000010495	ALDH18A1	1.48698665560489	5.71938963509872e-40	3.31226119922575e-38	UP
ENSSSCG00000030115	HS1BP3	1.21739954914165	5.97320064570517e-12	4.05003534651062e-11	UP
ENSSSCG00000005837	DIPK1B	1.06689123881732	0.000156374945551166	0.000435044884879565	UP
ENSSSCG00000010300	MSS51	2.03933051018101	4.99179107960222e-09	2.47628142946868e-08	UP
ENSSSCG00000010653	TRUB1	1.80838692925203	0.00220924884333975	0.00501289839093536	UP
ENSSSCG00000031102	C1orf174	2.21731045464325	1.82180358934291e-20	2.66515299136202e-19	UP
ENSSSCG00000000607	ART4	3.04998860889431	1.26458588486642e-06	4.72628679586696e-06	UP
ENSSSCG00000027105	TUBGCP5	1.25665473118514	2.75602026212027e-06	9.85687133407036e-06	UP
ENSSSCG00000022364	CPT1B	1.16469212811433	5.53942087086313e-08	2.42577830366448e-07	UP
ENSSSCG00000008363	AFTPH	1.24960776427359	5.46486583999876e-13	4.09459532522162e-12	UP
ENSSSCG00000032585	ZNF613	1.72361260064418	0.00015848756657272	0.00044053402201246	UP
ENSSSCG00000012124	TRAPPC2B	1.02503563800947	0.00610723233701383	0.0126898960261355	UP
ENSSSCG00000000734	TSPAN11	1.99176919487377	0.00117954003190257	0.0028076344085162	UP
ENSSSCG00000040421	HMG20B	1.14370568095212	3.40348924047409e-25	7.18546014397749e-24	UP
ENSSSCG00000032619	PIGB	1.00147085236991	6.99198649609477e-09	3.38863069148547e-08	UP
ENSSSCG00000001570	PI16	1.46264698865752	0.000401931549982829	0.00103749454478291	UP
ENSSSCG00000008545	ZNF512	3.28275280258485	5.14862621195961e-30	1.52944484531741e-28	UP
ENSSSCG00000039780	RTN4RL1	1.04169484058117	4.77567919270224e-05	0.000144241506717382	UP
ENSSSCG00000005388	INVS	1.02278010834617	1.32579584778530e-12	9.59207597609712e-12	UP
ENSSSCG00000023639	NRM	1.60546686676172	0.000122355004272506	0.000347130770548401	UP
ENSSSCG00000021880	MXRA8	2.46092361487025	4.42695568158577e-58	7.25848252987277e-56	UP
ENSSSCG00000010476	MYOF	2.04681898381364	2.21947557472777e-88	8.75652472841814e-86	UP
ENSSSCG00000011309	KIF15	1.68741635002064	2.56123048374267e-06	9.22817775606485e-06	UP
ENSSSCG00000026297	KLB	1.52425925895222	1.18175550971498e-07	5.00491892323101e-07	UP
ENSSSCG00000026293	STX5	1.95408785711154	0.00259749853804682	0.00581237487466167	UP
ENSSSCG00000014156	ARRDC3	1.13665371083722	1.91702430674601e-13	1.50512636024057e-12	UP
ENSSSCG00000034516	CDKL1	1.02984277126497	0.00123495634906508	0.00292739840535986	UP
ENSSSCG00000035061	WBP1	2.12504759665168	9.39946837598446e-17	1.00566345971868e-15	UP
ENSSSCG00000032266	SLC37A3	1.00417901004256	4.45371075356859e-06	1.55541074035418e-05	UP
ENSSSCG00000033057	ANAPC13	2.02297229983753	9.49730896192528e-12	6.27438648060213e-11	UP
ENSSSCG00000033054	ROM1	1.03989505729394	0.0107370320956562	0.0211970336524879	UP
ENSSSCG00000026181	AKTIP	1.86750736172349	2.35886082448755e-34	9.54506984267799e-33	UP
ENSSSCG00000017260	WIPI1	1.42849129631354	1.99544835212825e-30	6.05589794365844e-29	UP
ENSSSCG00000026185	VWA5B2	1.36839248117212	0.00247298021823229	0.00555738256589225	UP
ENSSSCG00000015772	AGA	1.26310597010119	2.83457009586815e-06	1.01263292191102e-05	UP
ENSSSCG00000034607	OGN	1.08981297485496	0.00631754791312675	0.0130709672899419	UP
ENSSSCG00000015777	TRAPPC11	1.04316007035719	1.87595483496661e-14	1.6067794973849e-13	UP
ENSSSCG00000023130	ASCC1	1.4943610296067	1.26376238339201e-29	3.64811007125481e-28	UP
ENSSSCG00000015175	VWA5A	1.42188442026585	4.76450975511352e-11	2.93281012473468e-10	UP
ENSSSCG00000017184	PRPSAP1	1.12038389757279	4.28263025223107e-14	3.56180546340035e-13	UP
ENSSSCG00000036114	RPL22L1	1.0802905607353	1.57445917550873e-20	2.3059799409278e-19	UP
ENSSSCG00000011699	HPS3	1.24005077536237	9.7770697828661e-06	3.25086926543809e-05	UP
ENSSSCG00000015196	SIAE	1.58202805886853	8.79487201387533e-07	3.35251386398479e-06	UP
ENSSSCG00000005924	MROH1	1.08353450079691	5.69461790692826e-10	3.14499348534424e-09	UP
ENSSSCG00000038901	CLDN15	2.15305941417685	1.425223444409e-08	6.68156182163521e-08	UP
ENSSSCG00000014577	TMEM9B	1.49804622398248	4.11049576772135e-36	1.93638093535381e-34	UP
ENSSSCG00000004814	LRRC28	1.1834952388254	3.08020465961362e-28	8.15253329719537e-27	UP
ENSSSCG00000013043	MACROD1	1.7650808130821	3.41830667105978e-05	0.000105722983150734	UP
ENSSSCG00000040888	KCTD13	1.47580967621938	6.94051067949069e-09	3.36756138849231e-08	UP
ENSSSCG00000008020	IFT140	1.00880941045517	0.000469335744612133	0.00119946635136198	UP
Downregulated
ENSSSCG00000030507	SMNDC1	-1.20632277378469	3.5472925916797e-22	5.8618545772194e-21	DOWN
ENSSSCG00000037732	SINHCAF	-1.85326659812406	2.97847845926465e-35	1.30566981070195e-33	DOWN
ENSSSCG00000003092	FOXA3	-1.78128149826052	0.00967347139761197	0.0192812719284577	DOWN
ENSSSCG00000003093	SYMPK	-1.10857841573548	1.46331003329932e-17	1.68714969592729e-16	DOWN
ENSSSCG00000003384	DNAJC11	-1.01343372347119	2.24576009733671e-18	2.77695604592321e-17	DOWN
ENSSSCG00000015355	DGKB	-1.38239886126248	0.0174792090959826	0.0329169174875866	DOWN
ENSSSCG00000023357	REST	-1.07368227910634	3.58699161459098e-26	8.1157292355217e-25	DOWN
ENSSSCG00000038622	HS3ST3A1	-2.20792826975406	0.000494755471857623	0.00126136668663217	DOWN
ENSSSCG00000032288	SLC20A1	-1.05969152396516	4.08947235917221e-17	4.51702436872696e-16	DOWN
ENSSSCG00000038013	DIRAS1	-1.13788635743889	0.000643374384486141	0.00160652721600821	DOWN
ENSSSCG00000028821	SASS6	-1.44539281407094	4.78163860682438e-13	3.61269822927336e-12	DOWN
ENSSSCG00000002944	WDR87	-1.49890960497518	0.0192259927522079	0.0357953337998268	DOWN
ENSSSCG00000032778	PLEKHG1	-2.69700175572356	9.2887824792835e-09	4.4572739947151e-08	DOWN
ENSSSCG00000037642	ARID3A	-1.99788474563671	1.92684269138532e-12	1.37514917912604e-11	DOWN
ENSSSCG00000037646	DNAJA4	-3.99377419458122	7.69894663569824e-223	1.38856001822415e-219	DOWN
ENSSSCG00000030616	RESF1	-2.51668881798148	9.89856330290567e-57	1.52401660608761e-54	DOWN
ENSSSCG00000016151	MAP2	-3.44186570111377	7.51346135070444e-23	1.32113439488361e-21	DOWN
ENSSSCG00000034994	AKAP1	-1.39453323431553	3.90478671664993e-25	8.13497232635402e-24	DOWN
ENSSSCG00000029249	NAV3	-1.04342024609415	6.3241633214016e-16	6.23709212077111e-15	DOWN
ENSSSCG00000013744	TRMT1	-1.29111327967767	7.05591200285667e-15	6.26888733540221e-14	DOWN
ENSSSCG00000003897	MOB3C	-1.12014837244853	2.74345947507532e-09	1.40113980068066e-08	DOWN
ENSSSCG00000008842	KIT	-1.41996595175238	0.0249771590194178	0.0451418160293316	DOWN
ENSSSCG00000003566	NUDC	-1.54999178073073	1.01654902471006e-66	2.17524261643467e-64	DOWN
ENSSSCG00000011951	NFKBIZ	-1.06778649495957	1.34206822223337e-09	7.08937711535408e-09	DOWN
ENSSSCG00000003561	ZDHHC18	-1.32083883204482	1.10397932158456e-28	3.0103107850983e-27	DOWN
ENSSSCG00000006718	ZNF697	-2.36286193516167	1.76887781567122e-49	1.74469393928509e-47	DOWN
ENSSSCG00000022778	SGF29	-1.74799031200599	2.31948202798605e-20	3.34668121180844e-19	DOWN
ENSSSCG00000033526	BAG2	-1.00299355611863	9.91107199811846e-14	8.00046572738143e-13	DOWN
ENSSSCG00000017338	PLCD3	-1.04009408003477	9.60494453495441e-08	4.1147751867594e-07	DOWN
ENSSSCG00000038178	FUT10	-1.28170508409488	5.39701918323832e-13	4.04856608368293e-12	DOWN
ENSSSCG00000001725	ADGRF5	-1.55860105184943	0.0197140957481823	0.03663925494197	DOWN
ENSSSCG00000025194	ZSWIM6	-1.77108463203822	7.80250134378205e-33	2.86356335654792e-31	DOWN
ENSSSCG00000003968	RIMKLA	-2.58138007831539	1.59761931852184e-08	7.4482806116463e-08	DOWN
ENSSSCG00000021184	OSGIN2	-1.35158308370327	4.19132122338704e-11	2.60667145050549e-10	DOWN
ENSSSCG00000024351	MET	-1.67783571808767	1.37353240143286e-27	3.44748440717493e-26	DOWN
ENSSSCG00000002544	PPP1R13B	-2.11450742793673	1.06841092684059e-29	3.10799261552131e-28	DOWN
ENSSSCG00000038287	RDH13	-1.08512710575536	1.6449631107058e-08	7.65486888044997e-08	DOWN
ENSSSCG00000040166	FLRT2	-2.11009143003447	2.8915157056806e-68	6.63734286985774e-66	DOWN
ENSSSCG00000039393	SPRED1	-1.75475641537352	5.56543368043539e-40	3.23795392698142e-38	DOWN
ENSSSCG00000002769	THAP11	-1.11834868426892	4.54993054419703e-16	4.5698387526243e-15	DOWN
ENSSSCG00000004279	OGFRL1	-1.26455689074467	6.55030358662916e-13	4.87316339311686e-12	DOWN
ENSSSCG00000029666	HOXA13	-1.55009022232622	0.000550590306641745	0.00139051862799601	DOWN
ENSSSCG00000021698	RRP1B	-1.52277705362756	4.51013603158941e-43	3.2352538294782e-41	DOWN
ENSSSCG00000032417	NGF	-1.24757852450348	0.011737152271072	0.0229845738207358	DOWN
ENSSSCG00000006048	DCAF13	-1.07913273026644	3.13393860058323e-15	2.8859208484583e-14	DOWN
ENSSSCG00000025203	KNOP1	-1.29306730695382	4.95849012282538e-16	4.94478181679861e-15	DOWN
ENSSSCG00000001705	TCTE1	-1.69745005075519	0.00521446759932385	0.0109940971011128	DOWN
ENSSSCG00000025206	RNF19B	-1.82821182668852	2.4344784588626e-48	2.2434518644628e-46	DOWN
ENSSSCG00000028446	PCBP4	-1.03848948868112	5.54744782869111e-09	2.73473365237116e-08	DOWN
ENSSSCG00000027935	FHOD3	-1.21508499894622	4.19402006881304e-17	4.61232607741853e-16	DOWN
ENSSSCG00000023984	RSL1D1	-1.1300372778829	3.25747290469675e-20	4.6312607456978e-19	DOWN
ENSSSCG00000016882	PARP8	-1.08782411886521	1.82859254119789e-22	3.09049274867783e-21	DOWN
ENSSSCG00000034049	TRIM16	-1.07280757181693	2.80293454532777e-18	3.43563578978283e-17	DOWN
ENSSSCG00000014972	CCDC82	-1.10606812815961	3.38102558893797e-08	1.51959587256468e-07	DOWN
ENSSSCG00000008629	ROCK2	-1.1098565011602	2.65630657892933e-19	3.54127461024106e-18	DOWN
ENSSSCG00000010486	HELLS	-1.12032949646332	9.74096820088269e-06	3.24142655603964e-05	DOWN
ENSSSCG00000030359	ARHGEF3	-1.94793353233507	7.59528730051381e-10	4.13321130038736e-09	DOWN
ENSSSCG00000012824	GAB3	-1.09779654182731	0.00413068926759591	0.00888826451768956	DOWN
ENSSSCG00000017934	CLDN7	-1.25813548432093	0.0135540568552619	0.026145144048538	DOWN
ENSSSCG00000021453	RIMS4	-3.48204625585621	8.24904213907051e-18	9.68782855867583e-17	DOWN
ENSSSCG00000001832	ACAN	-3.19737441056989	3.04365562907534e-21	4.72065753281033e-20	DOWN
ENSSSCG00000006287	SELL	-1.48075111982134	0.0115209048903787	0.0225961510394642	DOWN
ENSSSCG00000017938	YBX2	-2.44132169767279	2.23423745864987e-10	1.29213229113397e-09	DOWN
ENSSSCG00000030197	CD2AP	-1.09109376806842	2.51277544416796e-13	1.95584401865724e-12	DOWN
ENSSSCG00000000837	CHST11	-1.80565150126804	1.23404339913674e-73	3.31485062002157e-71	DOWN
ENSSSCG00000015979	HOXD13	-1.25198343929962	0.00338172054182403	0.0074096185075544	DOWN
ENSSSCG00000010314	AP3M1	-1.03731946174294	3.57986252154495e-22	5.90794305026209e-21	DOWN
ENSSSCG00000002739	PHLPP2	-1.54508952848141	6.05177986611163e-23	1.07158093702187e-21	DOWN
ENSSSCG00000027119	COA7	-2.06224963120115	6.76142569594556e-11	4.10794029890822e-10	DOWN
ENSSSCG00000017066	GEMIN5	-1.66088247732148	2.23115458120364e-41	1.42264275695434e-39	DOWN
ENSSSCG00000027846	RRP15	-1.82991411194448	3.64751078552622e-48	3.28927311909061e-46	DOWN
ENSSSCG00000010002	SF3A1	-1.04136284799019	1.22779759584736e-25	2.66797670354094e-24	DOWN
ENSSSCG00000034292	ZMYM1	-1.09380686267887	5.36958133927112e-09	2.65222865447175e-08	DOWN
ENSSSCG00000034293	ARL4C	-1.492564418272	5.02915121606762e-18	5.98990887762771e-17	DOWN
ENSSSCG00000009007	TMEM131L	-1.25768614585823	9.52571011585757e-08	4.0863775131737e-07	DOWN
ENSSSCG00000034297	HES2	-2.92498679858462	1.00303404328158e-09	5.37491714619268e-09	DOWN
ENSSSCG00000008534	WDR43	-1.79230493573294	9.01536237339216e-39	4.86405769077248e-37	DOWN
ENSSSCG00000035077	INHBA	-1.3978048116532	1.93081349899035e-17	2.20203436537969e-16	DOWN
ENSSSCG00000000058	SNU13	-1.11923479337246	1.07666166495094e-26	2.54072028411321e-25	DOWN
ENSSSCG00000035074	FOXO6	-1.39140900760876	0.0212571405452126	0.0390491294882196	DOWN
ENSSSCG00000022678	AMER2	-1.66509843599503	0.00546148670050856	0.0114708483769623	DOWN
ENSSSCG00000010460	RPP30	-1.24455621982615	8.36215663188819e-18	9.79334206656665e-17	DOWN
ENSSSCG00000014168	ELL2	-1.13128855131365	3.77782723479907e-23	6.79416935033309e-22	DOWN
ENSSSCG00000014163	SLF1	-1.6127517614701	7.64547219850389e-06	2.57878938033961e-05	DOWN
ENSSSCG00000009148	LEF1	-1.86241669205788	2.99995021351342e-10	1.70682160638157e-09	DOWN
ENSSSCG00000005660	TBC1D13	-1.0311186078861	6.4969456547635e-10	3.56470833947802e-09	DOWN
ENSSSCG00000008444	PRKCE	-1.36144335927717	1.51673117087593e-15	1.44192251749312e-14	DOWN
ENSSSCG00000003628	CLSPN	-1.20731275180043	2.00405439283518e-08	9.23064090096466e-08	DOWN
ENSSSCG00000010865	EXO1	-1.07220339462342	0.000296864480636753	0.000782935882189055	DOWN
ENSSSCG00000010863	AHCTF1	-1.18839226847864	6.15006899563862e-23	1.08745967885067e-21	DOWN
ENSSSCG00000011518	SHQ1	-1.17229872421142	1.29524014972262e-08	6.09709429166594e-08	DOWN
ENSSSCG00000026083	DNAJC24	-1.34956764950102	3.58190138848392e-11	2.24313020980206e-10	DOWN
ENSSSCG00000031746	KCNQ2	-1.34277447761885	0.00368038225090031	0.00800485422603123	DOWN
ENSSSCG00000026087	GKAP1	-2.1968054345546	6.83285387657527e-14	5.61254262796114e-13	DOWN
ENSSSCG00000026644	DDX46	-1.1539672385248	1.58169937001409e-14	1.36586556405116e-13	DOWN
ENSSSCG00000002764	SMPD3	-1.08247487592587	0.00101575606105712	0.00244591269709063	DOWN
ENSSSCG00000014347	PROB1	-2.19177264837858	1.58328336998293e-17	1.81883098690032e-16	DOWN
ENSSSCG00000023105	NET1	-1.81242274790831	1.67755870210773e-25	3.60803724260818e-24	DOWN
ENSSSCG00000004629	LYSMD2	-1.53033934663079	0.000170622982659342	0.000472186575202586	DOWN
ENSSSCG00000008030	TSR3	-1.15971865252628	3.35171395361687e-10	1.8950017315008e-09	DOWN
ENSSSCG00000003718	TAF4B	-1.22617937173164	5.2491854818461e-16	5.2181863549848e-15	DOWN
ENSSSCG00000040944	SKI	-1.29010283023204	8.62788390107281e-38	4.42792822158716e-36	DOWN
ENSSSCG00000005935	AGO2	-1.31048666062564	2.70830658729252e-34	1.08203704634709e-32	DOWN
ENSSSCG00000036125	PCDH10	-1.41052951323431	0.0154181993747664	0.0293802321929538	DOWN
ENSSSCG00000002265	FAM174B	-2.07757456507854	1.53081986408989e-19	2.07589696929482e-18	DOWN
ENSSSCG00000009927	FAM222A	-3.9030867316842	2.923597902959e-12	2.04716713948183e-11	DOWN
ENSSSCG00000030424	USP31	-1.77447185433535	9.45475821602898e-40	5.40119106232425e-38	DOWN
ENSSSCG00000013664	SHFL	-1.1652409343771	0.014259685477606	0.0273558014214823	DOWN
ENSSSCG00000004829	CACHD1	-2.54621581204204	9.45997792499672e-23	1.64280909632852e-21	DOWN
ENSSSCG00000004281	KCNQ5	-1.80157109673085	3.29101297944323e-21	5.07934460458077e-20	DOWN
ENSSSCG00000040893	ZNF488	-1.74466040328001	0.0112819434368023	0.0221791553861149	DOWN
ENSSSCG00000015504	CACYBP	-1.49065019165976	4.513542631275e-45	3.65278690511839e-43	DOWN
ENSSSCG00000004825	CHSY1	-2.20279475056498	8.11602194633061e-50	8.19718216579392e-48	DOWN
ENSSSCG00000023747	TTC19	-1.51876595047582	2.96378819407084e-13	2.29135492652445e-12	DOWN
ENSSSCG00000031580	LLPH	-1.23006394961799	3.73582190308084e-17	4.14453001110682e-16	DOWN
ENSSSCG00000028905	TNIK	-1.23693996211941	4.81859804595957e-12	3.29906726302818e-11	DOWN
ENSSSCG00000022611	CAPRIN2	-1.10073611833539	9.71489161909708e-08	4.15482746243566e-07	DOWN
ENSSSCG00000022986	CCSER1	-2.2944069192011	2.27255997851924e-05	7.18894255294548e-05	DOWN
ENSSSCG00000034858	RAP1GAP2	-4.72453816646723	2.38694383121282e-09	1.22600349345248e-08	DOWN
ENSSSCG00000015238	ARHGAP32	-1.17721944788697	1.78729522185805e-15	1.68770397725938e-14	DOWN
ENSSSCG00000008179	REV1	-1.53696962510389	4.98097256464362e-26	1.11497834447918e-24	DOWN
ENSSSCG00000015237	FLI1	-1.89820194972125	9.48891431289768e-09	4.54467159333586e-08	DOWN
ENSSSCG00000015235	ETS1	-1.36387267701554	7.3354196771104e-39	4.0090767715809e-37	DOWN
ENSSSCG00000003393	TMEM201	-2.61939761261731	9.1852571458511e-81	2.9734326017018e-78	DOWN
ENSSSCG00000023362	RHBDF2	-1.1836405888228	1.5041681496243e-06	5.58040637349596e-06	DOWN
ENSSSCG00000004755	DLL4	-1.7535915529607	0.0110285402286069	0.0217317497090936	DOWN
ENSSSCG00000004753	INO80	-1.06688171005767	4.2598470784309e-18	5.12684169353576e-17	DOWN
ENSSSCG00000003407	CASZ1	-1.96430941713533	0.000582366541092354	0.00146345095169008	DOWN
ENSSSCG00000006917	LRRC8C	-1.3419221362943	4.46263994183162e-30	1.33509074089157e-28	DOWN
ENSSSCG00000033082	HGS	-1.32902175836986	3.35471592833366e-32	1.16355188448386e-30	DOWN
ENSSSCG00000008853	TLL1	-3.01446531135475	9.20150246675136e-36	4.19382558277025e-34	DOWN
ENSSSCG00000022163	GNAL	-1.6896633587812	0.00694745961386028	0.0142551076913678	DOWN
ENSSSCG00000025344	PHC2	-1.33889911719646	1.42095510351825e-42	9.85690009995491e-41	DOWN
ENSSSCG00000015753	ANGPT2	-1.33262409161863	0.00119557817246715	0.00284205882647294	DOWN
ENSSSCG00000032145	IRX5	-1.35162741390779	2.68633441187283e-07	1.0919179636154e-06	DOWN
ENSSSCG00000039962	HSPB1	-2.20930993225945	6.12529263796395e-114	4.83323872214343e-111	DOWN
ENSSSCG00000006876	PLPPR5	-2.35307107980508	5.20144284339607e-05	0.00015598151044626	DOWN
ENSSSCG00000009426	CCDC122	-1.3821796069098	0.00378422233345389	0.00820608158018813	DOWN
ENSSSCG00000017328	ARHGAP27	-2.02699797216304	6.02319005616961e-09	2.94739435888144e-08	DOWN
ENSSSCG00000038148	PROKR1	-2.73365059539412	2.58307466245109e-13	2.0043833812812e-12	DOWN
ENSSSCG00000002280	RAB15	-1.50422678666437	1.62564265987366e-05	5.24501369305009e-05	DOWN
ENSSSCG00000006497	MEX3A	-2.62129697260268	1.91208743106626e-05	6.10832586467902e-05	DOWN
ENSSSCG00000003973	CTPS1	-1.19732840455062	3.8348073996679e-22	6.32042342308189e-21	DOWN
ENSSSCG00000007476	KCNG1	-2.45311742741483	2.53973178241266e-35	1.1211228584951e-33	DOWN
ENSSSCG00000039707	RTKN2	-1.09033227678996	0.00255447901276877	0.00572016628879137	DOWN
ENSSSCG00000014140	GPR150	-1.48668435250025	0.0214382070172303	0.0393566617323311	DOWN
ENSSSCG00000039703	EEPD1	-1.57226200250963	0.000369348743785421	0.000960458885744787	DOWN
ENSSSCG00000007275	RALY	-1.01690870936974	4.0962352715456e-18	4.93463457092206e-17	DOWN
ENSSSCG00000036314	HHEX	-3.20345111361655	1.81550411464471e-22	3.07545216410479e-21	DOWN
ENSSSCG00000028585	CBLL1	-1.18156718631902	4.21292020040346e-22	6.907547731181e-21	DOWN
ENSSSCG00000029507	RASGEF1B	-1.4025042767951	4.79238382905512e-12	3.28289993715795e-11	DOWN
ENSSSCG00000006059	NCALD	-1.99842732276017	0.00329421754718437	0.0072354726049413	DOWN
ENSSSCG00000007504	RBM38	-3.86201251875096	1.00706649519973e-52	1.23438975746569e-50	DOWN
ENSSSCG00000021688	ZDHHC13	-1.20794075132804	1.86231467321032e-07	7.72141962209532e-07	DOWN
ENSSSCG00000001004	SLC22A23	-2.53932372435025	3.20892882880418e-21	4.96479490976136e-20	DOWN
ENSSSCG00000009479	RBM26	-1.08731466298485	9.09300058466308e-19	1.16075968029698e-17	DOWN
ENSSSCG00000021205	STK26	-1.08930963026317	0.00290435491406174	0.00644759641111824	DOWN
ENSSSCG00000021206	IL1RAP	-2.57147089464197	4.69769025972543e-93	1.97694465096779e-90	DOWN
ENSSSCG00000016337	ERFE	-1.76204050947953	0.00766444899097784	0.0156120794629066	DOWN
ENSSSCG00000000779	KIF21A	-1.95304039086293	0.000210503701185792	0.000572884075764308	DOWN
ENSSSCG00000001483	FAM83B	-1.69886569512284	1.64815477948738e-05	5.31357356767828e-05	DOWN
ENSSSCG00000001488	GCLC	-3.04696393395774	4.03532006698604e-111	2.42599599265232e-108	DOWN
ENSSSCG00000025830	NUP93	-1.30615115597558	3.69739861038876e-19	4.87770715320356e-18	DOWN
ENSSSCG00000008635	NOL10	-1.08328383700164	9.50327634963255e-19	1.20946435397289e-17	DOWN
ENSSSCG00000015986	HOXD1	-1.78907991487641	6.32848713402597e-16	6.23709212077111e-15	DOWN
ENSSSCG00000016850	LIFR	-1.31316537551925	2.46171815562789e-16	2.53500748081583e-15	DOWN
ENSSSCG00000028274	FAM131B	-1.42906759264135	0.00600651918786465	0.0125073898642242	DOWN
ENSSSCG00000028638	UTP4	-1.15798380817661	1.53378359130033e-18	1.92103351588955e-17	DOWN
ENSSSCG00000017926	SLC16A13	-1.15681555721647	0.0205280327317427	0.0379119972554493	DOWN
ENSSSCG00000017693	AATF	-1.45542275547283	2.0208362785789e-27	5.03216134458751e-26	DOWN
ENSSSCG00000000531	BICD1	-1.17656720834998	4.15991334790572e-16	4.19145299419871e-15	DOWN
ENSSSCG00000006290	SLC19A2	-1.31481303673645	8.36062373415957e-19	1.07269181548541e-17	DOWN
ENSSSCG00000000844	NFYB	-1.22350380006822	2.5578499368046e-13	1.98725264320973e-12	DOWN
ENSSSCG00000017104	NSUN2	-1.238104349457	5.56162740047009e-35	2.36415979565437e-33	DOWN
ENSSSCG00000017102	TENT4A	-1.88673918397261	5.11991692861226e-66	1.07731585372883e-63	DOWN
ENSSSCG00000005015	SOS2	-1.07126071593578	2.67924167733834e-10	1.53472895537189e-09	DOWN
ENSSSCG00000000199	SPATS2	-1.19712769435399	2.56700301917087e-11	1.62529654548807e-10	DOWN
ENSSSCG00000026506	RALGAPA2	-1.44866316553068	1.33059025874082e-14	1.15375700663481e-13	DOWN
ENSSSCG00000039713	ANKRD9	-1.45110051563584	8.63452125021641e-14	7.01034281569017e-13	DOWN
ENSSSCG00000027872	MYBL1	-1.90798379999267	4.78823449141112e-25	9.94267441678707e-24	DOWN
ENSSSCG00000034280	LARP1B	-1.40176696824693	2.80800700693427e-09	1.43294617876092e-08	DOWN
ENSSSCG00000006780	WNT2B	-1.22552227896452	1.18388111781485e-07	5.01223980966213e-07	DOWN
ENSSSCG00000014003	MIER2	-1.3372555457751	4.98500880592698e-12	3.40561342937381e-11	DOWN
ENSSSCG00000026894	NFE2L3	-1.60553610781546	1.01907906146768e-09	5.45164116569044e-09	DOWN
ENSSSCG00000026896	CPSF4	-1.23761636987178	4.21530862473807e-12	2.9049274774737e-11	DOWN
ENSSSCG00000032705	USP42	-1.58145033043091	2.9156126163462e-28	7.7331111935653e-27	DOWN
ENSSSCG00000014177	CHD1	-1.62495566942725	7.20184884320102e-46	5.98179879246137e-44	DOWN
ENSSSCG00000014176	RGMB	-1.90430152663601	6.14892409495696e-55	8.82160985213996e-53	DOWN
ENSSSCG00000005652	GLE1	-1.44260449594603	3.522881514508e-25	7.41272985344392e-24	DOWN
ENSSSCG00000011672	RASA2	-1.1552039612433	2.53266945097405e-11	1.60436286094066e-10	DOWN
ENSSSCG00000023112	PDS5A	-1.34720609742776	2.75634027132011e-28	7.32606230008766e-27	DOWN
ENSSSCG00000024071	SCARF1	-1.84639764893964	3.54813093824578e-09	1.79108968793894e-08	DOWN
ENSSSCG00000036751	PPM1H	-1.26044679724093	0.000369195923368716	0.000960259277406272	DOWN
ENSSSCG00000011500	KBTBD8	-1.32803709658865	3.75513232814994e-07	1.49742721550515e-06	DOWN
ENSSSCG00000007355	TOP1	-1.33649085447021	5.35571872979852e-35	2.28432260012521e-33	DOWN
ENSSSCG00000006145	E2F5	-1.13459322420185	0.000268136265557064	0.000714482978610793	DOWN
ENSSSCG00000005729	DDX31	-1.25078619839875	3.18361895247824e-16	3.23877431708604e-15	DOWN
ENSSSCG00000005724	SETX	-1.16778276512961	1.07812989118533e-15	1.0390373951309e-14	DOWN
ENSSSCG00000005235	KANK1	-1.85619955022913	8.76867874219218e-27	2.08483181017281e-25	DOWN
ENSSSCG00000029991	SNIP1	-1.4599532898432	2.04574731683731e-17	2.3289053088432e-16	DOWN
ENSSSCG00000007872	XYLT1	-1.67453310193482	1.60243800274834e-39	9.03159811816868e-38	DOWN
ENSSSCG00000035715	GCH1	-2.54139176657548	1.33755184600645e-35	6.0309257342255e-34	DOWN
ENSSSCG00000003762	ADGRL4	-1.51753698786712	0.0232916940803697	0.042377525106365	DOWN
ENSSSCG00000003761	ADGRL2	-1.08542460267759	9.28576374061234e-17	9.94340688933255e-16	DOWN
ENSSSCG00000008048	RNPS1	-1.15374491628975	1.12586804613713e-37	5.75468991193573e-36	DOWN
ENSSSCG00000012741	MAMLD1	-1.23158801071233	1.00290539895383e-12	7.32736149409268e-12	DOWN
ENSSSCG00000023595	AK3	-1.10143361094863	7.75382558695967e-13	5.72468117165882e-12	DOWN
ENSSSCG00000023593	AFF1	-1.3967146375682	1.3652440974892e-22	2.33236897575118e-21	DOWN
ENSSSCG00000031942	YES1	-1.40972232251518	8.45739658546978e-28	2.15271435265234e-26	DOWN
ENSSSCG00000012631	LONRF3	-1.61011691051692	4.06613630027026e-27	9.92458652841294e-26	DOWN
ENSSSCG00000037530	TACC2	-1.22896721031098	1.18183507504449e-11	7.71891765257976e-11	DOWN
ENSSSCG00000037531	MAP3K11	-1.39306110563041	2.64191209745429e-18	3.25089086065891e-17	DOWN
ENSSSCG00000026318	NETO2	-2.73713345219364	5.3614713084809e-21	8.13564606605424e-20	DOWN
ENSSSCG00000023204	AXIN1	-1.18212018149934	2.9537247464707e-23	5.36557912578311e-22	DOWN
ENSSSCG00000018056	SRCIN1	-3.2745945492038	1.38259120583977e-06	5.1520702401792e-06	DOWN
ENSSSCG00000018057	SOCS7	-1.11877408311485	4.90630126412907e-16	4.90047891294537e-15	DOWN
ENSSSCG00000015538	KIAA1614	-1.20931896241274	1.62131553964896e-15	1.53903072842618e-14	DOWN
ENSSSCG00000008289	MTHFD2	-1.31842078461088	4.52351507338603e-12	3.10883929240602e-11	DOWN
ENSSSCG00000011721	P2RY1	-2.28701501731186	4.39370839981387e-07	1.73943457346034e-06	DOWN
ENSSSCG00000011723	MME	-1.41726547314798	0.00175234946398384	0.00404376018694862	DOWN
ENSSSCG00000040333	NUP62	-1.06967965798196	5.67446879229126e-12	3.85992287191148e-11	DOWN
ENSSSCG00000040847	AP1S3	-1.38035544346017	0.00095296670148981	0.00230703827541876	DOWN
ENSSSCG00000037087	PRRT4	-2.29177648664895	0.000153235180828458	0.000426780092203681	DOWN
ENSSSCG00000036620	DPH2	-1.24256494863415	1.43801199341125e-14	1.24604676848436e-13	DOWN
ENSSSCG00000033413	NRTN	-1.63308778395995	0.00900235110376764	0.0180691069451616	DOWN
ENSSSCG00000037241	RGS2	-2.82708844177857	7.14059736068047e-15	6.33521023742733e-14	DOWN
ENSSSCG00000023973	NOC2L	-1.83400038965026	8.05319343438065e-49	7.58743038127281e-47	DOWN
ENSSSCG00000023378	ZNF316	-1.10631557692562	2.29001328322421e-14	1.94166673611186e-13	DOWN
ENSSSCG00000035537	RUNX1	-1.6703513556614	1.24668536010069e-30	3.85769673315469e-29	DOWN
ENSSSCG00000015403	HGF	-1.22067307984904	0.0116657252059652	0.0228624310346648	DOWN
ENSSSCG00000033634	ERI1	-1.44631045321105	1.70141826603964e-14	1.46523912747274e-13	DOWN
ENSSSCG00000038600	PRSS8	-1.70984644358551	4.2564625152595e-05	0.000129681038128242	DOWN
ENSSSCG00000033093	RGS6	-1.53406257400418	0.0174016680593958	0.0327953514330306	DOWN
ENSSSCG00000012166	SMS	-1.06346678647619	3.377972863801e-25	7.14353557880864e-24	DOWN
ENSSSCG00000015015	ARHGAP20	-2.99662451510919	6.96286743835106e-06	2.36601006008716e-05	DOWN
ENSSSCG00000013761	CC2D1A	-1.18649228390211	9.65827932635388e-15	8.49134933810709e-14	DOWN
ENSSSCG00000039551	RNF126	-1.4740087774324	7.67695918648231e-36	3.51165252642533e-34	DOWN
ENSSSCG00000000186	RHEBL1	-1.60307248520748	0.0168677975273743	0.0318844054174429	DOWN
ENSSSCG00000022151	B3GALT6	-1.80378191709984	7.95705251584406e-11	4.80429402259834e-10	DOWN
ENSSSCG00000003509	SH2D5	-1.52317518570557	0.00741947015566523	0.0151497348722745	DOWN
ENSSSCG00000025685	TP73	-2.88417364937182	1.55198337026214e-11	1.00070429262306e-10	DOWN
ENSSSCG00000022159	FNDC3A	-1.21668942097439	1.72469097623759e-23	3.20209170220583e-22	DOWN
ENSSSCG00000040207	P2RY2	-1.88722754151394	1.35150712629975e-27	3.39895965528574e-26	DOWN
ENSSSCG00000040202	CRLS1	-1.03682799945129	1.50851010421366e-11	9.73667692520323e-11	DOWN
ENSSSCG00000039950	RMI1	-1.12050761374885	1.69596145446428e-05	5.4551626401558e-05	DOWN
ENSSSCG00000033541	NAT8L	-1.78983046573621	0.00218204243428311	0.00495561894816051	DOWN
ENSSSCG00000002294	ARG2	-4.03527111853493	8.25559992375166e-23	1.44558875225194e-21	DOWN
ENSSSCG00000002290	PLEK2	-2.62968861712252	1.44296604905165e-24	2.8916581538535e-23	DOWN
ENSSSCG00000007469	PTPN1	-1.13381242097601	7.74054377663136e-20	1.07153909188565e-18	DOWN
ENSSSCG00000007465	B4GALT5	-2.11944668886692	2.45370282575198e-40	1.45436611150792e-38	DOWN
ENSSSCG00000001010	WRNIP1	-1.22279223734037	1.28865338554565e-25	2.79060874657184e-24	DOWN
ENSSSCG00000009551	ARHGEF7	-1.2120054801032	2.84376916010073e-26	6.48061112748587e-25	DOWN
ENSSSCG00000007268	E2F1	-1.14803117505704	1.10963065922132e-08	5.27053689716672e-08	DOWN
ENSSSCG00000003214	KCNC3	-1.64350356039648	0.000858857042677803	0.00209892957100411	DOWN
ENSSSCG00000030706	FAM43B	-1.2848992810061	0.0115154091008271	0.0225894179580489	DOWN
ENSSSCG00000017265	AXIN2	-2.44381473482173	1.09981512293093e-11	7.22057510504578e-11	DOWN
ENSSSCG00000001036	TFAP2A	-2.80881172985064	2.75486334312076e-20	3.93886180146089e-19	DOWN
ENSSSCG00000001729	PTCHD4	-1.69128405185621	0.00510117929477574	0.0107786424429362	DOWN
ENSSSCG00000016193	CNOT9	-1.01868012662355	1.41920668483353e-17	1.63779564863102e-16	DOWN
ENSSSCG00000016620	TSPAN12	-1.07171354941461	4.92815491264757e-18	5.88071415616026e-17	DOWN
ENSSSCG00000001701	HSP90AB1	-1.02105664178474	3.82516142092711e-31	1.23827340869756e-29	DOWN
ENSSSCG00000014919	ME3	-2.42624842087394	7.35146955946398e-44	5.58807442979175e-42	DOWN
ENSSSCG00000034062	SV2C	-1.93031930163237	7.90625980647704e-05	0.000230363558866311	DOWN
ENSSSCG00000014917	CCDC81	-1.63914847945405	0.000210151535387275	0.000572134579441046	DOWN
ENSSSCG00000016726	ADCY1	-1.41625734832222	0.0148921111978197	0.0284868036170415	DOWN
ENSSSCG00000009482	SPRY2	-1.77389399356385	0.000361811750474496	0.000942412492209721	DOWN
ENSSSCG00000039049	MAP7	-1.58241955927153	0.0111840317004128	0.0220072319541322	DOWN
ENSSSCG00000009739	NOC4L	-1.10288633226951	1.74108288283034e-09	9.07188254054191e-09	DOWN
ENSSSCG00000027312	PTCH1	-1.66033006787691	3.29875537620021e-09	1.67054900218723e-08	DOWN
ENSSSCG00000006335	RGS4	-5.51542927833538	1.09665401524595e-78	3.37689193719026e-76	DOWN
ENSSSCG00000024065	TMTC2	-1.77584644255551	0.00235100184640926	0.00530593462833696	DOWN
ENSSSCG00000017918	ARRB2	-1.35193113052605	4.68301488638016e-11	2.8896902707991e-10	DOWN
ENSSSCG00000021306	GJC1	-2.78294493279749	5.16300485217776e-94	2.24768745719808e-91	DOWN
ENSSSCG00000021307	USP44	-2.25584095705968	7.9387817462278e-07	3.0371854407917e-06	DOWN
ENSSSCG00000000521	PHLDA1	-1.07774321178998	0.0130907515794546	0.0253404996459084	DOWN
ENSSSCG00000017667	PTRH2	-1.0190966708764	3.07236780194394e-08	1.38778688728237e-07	DOWN
ENSSSCG00000016992	NEURL1B	-1.72542021765715	8.34657008299005e-06	2.79956023639079e-05	DOWN
ENSSSCG00000016997	FGF18	-1.56208931565526	0.000837142911938325	0.00205102450285685	DOWN
ENSSSCG00000000853	NT5DC3	-2.0372877599102	2.63962303126484e-23	4.82974503908966e-22	DOWN
ENSSSCG00000016998	NPM1	-1.17673519197887	2.52616345754273e-34	1.01247027465006e-32	DOWN
ENSSSCG00000030177	EBNA1BP2	-1.28850570919143	3.10165892859629e-28	8.19214309069627e-27	DOWN
ENSSSCG00000010595	INA	-2.91494291609878	1.79338357159097e-06	6.61064747192292e-06	DOWN
ENSSSCG00000010597	TAF5	-1.1326993687868	3.51135009225858e-05	0.000108414758901356	DOWN
ENSSSCG00000010599	PDCD11	-1.02054703409193	1.384970967304e-20	2.03553649152654e-19	DOWN
ENSSSCG00000040713	TXLNG	-1.19455326008479	4.73466245283114e-11	2.91870671225553e-10	DOWN
ENSSSCG00000028840	EZH2	-1.90215703422373	3.82103321042892e-43	2.75660253038086e-41	DOWN
ENSSSCG00000017489	PSMD3	-1.01347683880655	5.10722827278446e-23	9.10716905987342e-22	DOWN
ENSSSCG00000000297	PDE1B	-2.14921571924734	2.94109886020019e-06	1.04979850466575e-05	DOWN
ENSSSCG00000027266	PNPLA3	-1.00439712213021	0.00884338692065843	0.0177896366910951	DOWN
ENSSSCG00000009129	TIFA	-1.1117064289618	2.23458620973706e-06	8.11846069005189e-06	DOWN
ENSSSCG00000000076	SGSM3	-1.11397636528396	1.72988220604437e-08	8.0263737050019e-08	DOWN
ENSSSCG00000000075	MRTFA	-1.03678883918816	6.11787703971563e-19	7.92186642322152e-18	DOWN
ENSSSCG00000008878	PPID	-2.32464659580984	9.94220430114758e-53	1.23059146374498e-50	DOWN
ENSSSCG00000010445	ANKRD22	-1.2417898481003	0.0269320174536509	0.0483252871450174	DOWN
ENSSSCG00000008465	KCNG3	-1.45065282183143	0.0132038619178275	0.0255437874214791	DOWN
ENSSSCG00000005130	ELAVL2	-2.14767733803882	0.00151267423366479	0.00353330475485994	DOWN
ENSSSCG00000032710	E2F2	-2.48553509362963	1.58754464630004e-05	5.12864666313664e-05	DOWN
ENSSSCG00000007110	NKX2-4	-1.35580173930156	0.0171057283193653	0.0322954718157599	DOWN
ENSSSCG00000023165	SEMA7A	-2.66989302070211	3.78105582822001e-69	9.35996663358385e-67	DOWN
ENSSSCG00000032433	PTCHD1	-1.61661396070185	1.62586745256254e-29	4.62417291088573e-28	DOWN
ENSSSCG00000004191	MOXD1	-2.31380842427027	0.000655026306514698	0.00163432947030594	DOWN
ENSSSCG00000026224	ARHGAP31	-1.61106981639947	7.23621040444329e-51	7.80830396205954e-49	DOWN
ENSSSCG00000030485	ELFN1	-1.37200155772215	0.00248023624757825	0.00556774228763787	DOWN
ENSSSCG00000036724	CRYAB	-2.49759951371908	1.03822710378737e-115	8.73841145687703e-113	DOWN
ENSSSCG00000011538	LMCD1	-1.6376896006269	2.54670388289712e-20	3.64950471300523e-19	DOWN
ENSSSCG00000010840	RGS7	-1.03471860515999	4.30513246675614e-06	1.50685604083161e-05	DOWN
ENSSSCG00000011884	HCLS1	-1.37980226400418	3.91867940275558e-08	1.74447558038749e-07	DOWN
ENSSSCG00000034494	MARS2	-1.32878770020306	2.02229631063229e-08	9.30787128025251e-08	DOWN
ENSSSCG00000005227	PUM3	-1.75153034877246	4.06385839392987e-38	2.13775884264019e-36	DOWN
ENSSSCG00000011888	GPR156	-1.00645149202394	1.09570113250603e-05	3.61558463091705e-05	DOWN
ENSSSCG00000009234	ABRAXAS1	-1.82120850594323	7.44717704146146e-14	6.0933642351556e-13	DOWN
ENSSSCG00000008055	TEDC2	-2.78939436522895	6.1392454050905e-13	4.57544115934283e-12	DOWN
ENSSSCG00000016903	GZMA	-3.33289226858322	2.81739553481918e-08	1.27636496197038e-07	DOWN
ENSSSCG00000036437	NOG	-1.86413409098346	1.02363428571586e-05	3.3937454982045e-05	DOWN
ENSSSCG00000036208	SHMT1	-1.15938338326479	0.00700328961913087	0.014357994712817	DOWN
ENSSSCG00000014430	ABLIM3	-1.32408905630925	9.24081702731334e-05	0.000266419993080226	DOWN
ENSSSCG00000014437	PPARGC1B	-2.06554741460267	5.82807307834062e-13	4.35381198899706e-12	DOWN
ENSSSCG00000031847	RBM28	-1.65329550643813	2.7896429175331e-32	9.75602266865801e-31	DOWN
ENSSSCG00000012620	NKRF	-1.06429749036274	1.00738193279096e-09	5.39592571127954e-09	DOWN
ENSSSCG00000009833	SH2B3	-1.2499156993126	1.9735435877414e-22	3.32656712886985e-21	DOWN
ENSSSCG00000018047	FAM83G	-2.09878183714429	1.95050050583232e-15	1.82949991724614e-14	DOWN
ENSSSCG00000018045	ULK2	-1.00005259335234	6.98875879956269e-16	6.87173519037998e-15	DOWN
ENSSSCG00000008292	TET3	-1.92985740860949	5.27909174839952e-53	6.73217508318625e-51	DOWN
ENSSSCG00000023760	CLEC14A	-1.93094999514836	3.17086120422692e-16	3.22948402454192e-15	DOWN
ENSSSCG00000022092	CYP7B1	-1.23146934865013	5.39637120002498e-07	2.11122362566828e-06	DOWN
ENSSSCG00000040329	ALX4	-2.13202357680147	0.000328452275050183	0.000860670396950717	DOWN
ENSSSCG00000030575	TMEM158	-1.52453011055757	3.06018971074505e-11	1.9307793652252e-10	DOWN
ENSSSCG00000037701	GPR182	-1.11765861753015	2.61483134082431e-07	1.0645677419512e-06	DOWN
ENSSSCG00000012551	RNF128	-1.68143188935142	0.00752714693567258	0.0153497383399881	DOWN
ENSSSCG00000034873	KRBA1	-1.78180217424746	2.40858719937896e-07	9.84091048289947e-07	DOWN
ENSSSCG00000008180	EIF5B	-1.04426289181038	1.49920589897576e-21	2.36444930942082e-20	DOWN
ENSSSCG00000008187	CRACDL	-4.15127345112638	4.23358668432071e-49	4.04916908254159e-47	DOWN
ENSSSCG00000039592	ZMYND19	-2.562753812911	1.45360198010506e-08	6.80954545410998e-08	DOWN
ENSSSCG00000003377	ACOT7	-1.95884093210178	7.84951062709425e-25	1.5983882526946e-23	DOWN
ENSSSCG00000000932	NTS	-2.10463193473899	0.00077143597787849	0.0019033377410037	DOWN
ENSSSCG00000004772	BAHD1	-1.0720924795256	9.85232009558127e-23	1.70158059106311e-21	DOWN
ENSSSCG00000004776	DISP2	-1.29150390450087	0.02291012045359	0.0417494617099558	DOWN
ENSSSCG00000032096	LETMD1	-1.10918101994956	4.27670652546746e-15	3.89001584178866e-14	DOWN
ENSSSCG00000032097	DUSP16	-1.81457655859198	1.75592261292409e-46	1.4681141051766e-44	DOWN
ENSSSCG00000012173	SAT1	-1.94288335702193	1.12584660898707e-77	3.3055380089446e-75	DOWN
ENSSSCG00000037670	TMEM164	-1.43199917754361	2.39256902604257e-18	2.95559529880503e-17	DOWN
ENSSSCG00000037676	KAZN	-2.02652374430969	2.20555851544429e-24	4.35570187384487e-23	DOWN
ENSSSCG00000032360	PANX1	-1.79257904653621	5.66530687017814e-18	6.73488693370989e-17	DOWN
ENSSSCG00000007077	ESF1	-1.32291078551871	9.40967838818085e-15	8.28432284872965e-14	DOWN
ENSSSCG00000025326	TMEM243	-1.32748785545672	1.99057624290283e-14	1.69919033581124e-13	DOWN
ENSSSCG00000022780	UGCG	-1.05322821276825	7.68909929935726e-13	5.68021525186573e-12	DOWN
ENSSSCG00000022784	PLEKHO1	-1.77777686383693	1.15861804356314e-42	8.12641822221367e-41	DOWN
ENSSSCG00000020808	CCT6A	-1.33171690283243	1.07798182125403e-30	3.36037543045239e-29	DOWN
ENSSSCG00000028883	SETD4	-1.27520535716171	0.000398186897081756	0.00102866985382795	DOWN
ENSSSCG00000013397	ARNTL	-1.5713401163533	3.9515007269572e-11	2.46358995939924e-10	DOWN
ENSSSCG00000038128	CDYL2	-1.07354061801398	1.39465951492782e-09	7.34873805340721e-09	DOWN
ENSSSCG00000038126	MGAT3	-2.8590517542552	2.9595872595524e-25	6.30097624820388e-24	DOWN
ENSSSCG00000011599	GRIP2	-1.43597435677571	0.0220168608731186	0.0402844736990033	DOWN
ENSSSCG00000022247	PROSER2	-2.05815565239338	1.71724445944327e-33	6.53018412664797e-32	DOWN
ENSSSCG00000009716	SH3RF1	-1.19228032672503	1.57153808628364e-12	1.13116695207132e-11	DOWN
ENSSSCG00000025788	ENPP4	-1.43406405510463	1.71961250183933e-07	7.1697846221009e-07	DOWN
ENSSSCG00000035366	MFHAS1	-1.01275455387484	7.97973971236415e-14	6.49962670119983e-13	DOWN
ENSSSCG00000037177	C2CD4C	-2.01371082835587	0.000136196359557085	0.00038210645320182	DOWN
ENSSSCG00000001938	SSTR1	-2.59748878688989	3.28231051042937e-12	2.28566851594985e-11	DOWN
ENSSSCG00000031924	NKX3-1	-1.76316727589102	0.00804448432528374	0.0163225419803984	DOWN
ENSSSCG00000014924	CTSC	-1.14393838117797	1.83301004121182e-17	2.09617316759957e-16	DOWN
ENSSSCG00000017273	PSMD12	-1.09109790075255	1.65062368314599e-22	2.80850727759004e-21	DOWN
ENSSSCG00000013028	ESRRA	-1.69467310283887	9.79877056777758e-36	4.44998123806446e-34	DOWN
ENSSSCG00000006039	LRP12	-1.58157320815164	7.61127040595679e-30	2.23991349359451e-28	DOWN
ENSSSCG00000006038	ZFPM2	-1.16454644697471	7.9655249119921e-06	2.68101178389497e-05	DOWN
ENSSSCG00000008729	LYAR	-2.1222876772478	1.00252052624625e-51	1.13688290813279e-49	DOWN
ENSSSCG00000006037	OXR1	-1.13796550029196	9.34586710801578e-15	8.23963493287006e-14	DOWN
ENSSSCG00000035839	TOP3A	-1.10634343106901	2.11850413032022e-19	2.84230761373993e-18	DOWN
ENSSSCG00000007323	DSN1	-1.39046403230122	6.40433434717466e-11	3.89661306665446e-10	DOWN
ENSSSCG00000002135	PNP	-1.60550289636867	1.45484367771856e-26	3.38257853244877e-25	DOWN
ENSSSCG00000001731	CENPQ	-1.13090818818892	6.14813190396913e-07	2.39199276695255e-06	DOWN
ENSSSCG00000040047	TMEM151B	-1.7456780063291	0.000124077008905874	0.00035146336940468	DOWN
ENSSSCG00000010613	ITPRIP	-2.31671533735415	3.51685142937181e-54	4.82611405389337e-52	DOWN
ENSSSCG00000034726	KCNH5	-2.03853394799881	0.00282063894612987	0.00627388419571699	DOWN
ENSSSCG00000008617	CYRIA	-1.45530371497668	0.00453167551094048	0.00968046238934224	DOWN
ENSSSCG00000008615	VSNL1	-1.2606464836777	0.0273356316124207	0.0488827689952991	DOWN
ENSSSCG00000001916	INSYN1	-1.07829775529274	0.0054686714623007	0.0114821182789866	DOWN
ENSSSCG00000027676	NOP56	-1.39355442485687	2.57153120915825e-43	1.87662320899555e-41	DOWN
ENSSSCG00000042572	IMP3	-1.09265324701903	1.04553313566731e-07	4.45790470712588e-07	DOWN
ENSSSCG00000000519	GLIPR1	-1.227423650603	9.44074606311117e-10	5.08053789628212e-09	DOWN
ENSSSCG00000016275	NCL	-1.11470212390608	5.84052286574104e-25	1.19896912487773e-23	DOWN
ENSSSCG00000014440	HMGXB3	-1.53157833297136	2.64577349153029e-30	7.97205019822672e-29	DOWN
ENSSSCG00000001841	RHCG	-1.91920449826665	4.17796164113394e-15	3.80843073785675e-14	DOWN
ENSSSCG00000000515	TRHDE	-1.26219606204873	0.0256532826788372	0.0462477072426559	DOWN
ENSSSCG00000009584	SEMA4D	-1.21571131468465	2.95586473346902e-05	9.2244670914622e-05	DOWN
ENSSSCG00000000869	UTP20	-1.41290708024527	1.62624378014516e-29	4.62417291088573e-28	DOWN
ENSSSCG00000031441	GRAMD4	-1.98379130961942	7.50567599927868e-22	1.20405539378518e-20	DOWN
ENSSSCG00000001597	LRFN2	-3.50269256309275	9.38858464268004e-23	1.63265676465338e-21	DOWN
ENSSSCG00000017471	CDC6	-1.69883844268809	3.389867464937e-09	1.71462647214862e-08	DOWN
ENSSSCG00000028148	DMD	-1.42839998222853	2.68637884927072e-17	3.0254712731528e-16	DOWN
ENSSSCG00000005036	GPR137C	-1.71310586828315	0.00925510973253738	0.0185116857372124	DOWN
ENSSSCG00000017498	PPP1R1B	-1.13732936144939	1.48716986820267e-06	5.52221164295846e-06	DOWN
ENSSSCG00000017870	NCBP3	-1.01240626064638	2.08261114277073e-09	1.07625729338848e-08	DOWN
ENSSSCG00000027070	ENTPD6	-1.45555269061005	2.21264049800219e-14	1.87858683841813e-13	DOWN
ENSSSCG00000004105	NUP43	-1.02742475160953	8.48004437421443e-10	4.58307192741683e-09	DOWN
ENSSSCG00000027898	ATP2B1	-1.73160956063383	1.26368913056234e-37	6.40725914592352e-36	DOWN
ENSSSCG00000029392	HUNK	-2.58661366938837	3.24760687653017e-08	1.46275550539399e-07	DOWN
ENSSSCG00000034262	FIGN	-1.17596109323518	1.54011474683326e-05	4.98818591040787e-05	DOWN
ENSSSCG00000034265	DESI1	-2.23745482512302	5.29217818291929e-73	1.36354590937461e-70	DOWN
ENSSSCG00000009050	INPP4B	-1.84863926313922	3.40693609084347e-05	0.000105448806440056	DOWN
ENSSSCG00000035028	GRK6	-1.55582185505631	1.26173978083435e-28	3.42569134043736e-27	DOWN
ENSSSCG00000035029	NOVA2	-1.98512618349431	0.00132750287906054	0.00312623089873892	DOWN
ENSSSCG00000042208	H2AX	-1.30844663059114	1.58364594025708e-12	1.13923247839007e-11	DOWN
ENSSSCG00000035027	ZDHHC14	-2.10443997318314	6.8036612964002e-10	3.72328668691169e-09	DOWN
ENSSSCG00000014114	TENT2	-1.52387444915316	1.84925332377722e-27	4.61399668234929e-26	DOWN
ENSSSCG00000005105	MRPL46	-1.13496498061845	4.51051945513439e-11	2.7873376466506e-10	DOWN
ENSSSCG00000023174	USP53	-1.02663629036194	1.24157766442353e-16	1.30842387423599e-15	DOWN
ENSSSCG00000023173	REXO4	-2.53666949032203	3.58365041333863e-52	4.26826287437738e-50	DOWN
ENSSSCG00000001680	ABCC10	-1.44484254213135	1.66513402703333e-08	7.74302655296348e-08	DOWN
ENSSSCG00000003699	GREB1L	-1.27847274227455	0.0253203056790283	0.0456930902226605	DOWN
ENSSSCG00000009692	PINX1	-1.31338755973682	1.08992468544843e-15	1.04800450523887e-14	DOWN
ENSSSCG00000010540	ENTPD7	-1.38643876210066	8.20569015264727e-31	2.60293563259226e-29	DOWN
ENSSSCG00000010544	DNMBP	-1.25658289006996	6.98228645445536e-22	1.1229473437898e-20	DOWN
ENSSSCG00000005215	JAK2	-1.0751608733363	7.25453019390055e-14	5.93958778845619e-13	DOWN
ENSSSCG00000005217	RCL1	-1.74035945052715	7.40146463871224e-37	3.60785679782788e-35	DOWN
ENSSSCG00000004342	NDUFAF4	-1.42299313193332	2.19839949256864e-11	1.39893112871366e-10	DOWN
ENSSSCG00000033149	DDX47	-1.32164665138082	3.87660326420523e-16	3.91850410012738e-15	DOWN
ENSSSCG00000022312	RHPN2	-2.84656126029941	2.78888375039811e-07	1.13141572457507e-06	DOWN
ENSSSCG00000026129	ADGRL3	-1.03988551664149	0.0278214469963481	0.0496039780156608	DOWN
ENSSSCG00000040919	RTN4RL2	-1.14069946577614	3.98360647629792e-09	2.00131443546602e-08	DOWN
ENSSSCG00000031856	DACT1	-1.00794114739987	5.76901619186379e-09	2.83620831083646e-08	DOWN
ENSSSCG00000033381	IRF4	-1.83853367209323	0.00261783100540675	0.00585268575230392	DOWN
ENSSSCG00000034738	TRMT61A	-1.59753447309306	8.5756466512124e-19	1.09916283219854e-17	DOWN
ENSSSCG00000012967	FOSL1	-1.20549183953333	2.18100673317729e-14	1.8542228960514e-13	DOWN
ENSSSCG00000032558	EMX2	-2.25491802369857	3.27260890013419e-34	1.29519396126e-32	DOWN
ENSSSCG00000004507	SMAD7	-2.04252110396251	5.62717740688275e-11	3.4420113741228e-10	DOWN
ENSSSCG00000001963	EGLN3	-1.03433299583625	1.19260402466341e-08	5.64341297277945e-08	DOWN
ENSSSCG00000004509	LIPG	-1.13010525296768	1.25910035753952e-34	5.26362318342268e-33	DOWN
ENSSSCG00000009828	PPP1CC	-1.50344722197258	5.62905664187848e-41	3.53566368675203e-39	DOWN
ENSSSCG00000015085	IL10RA	-2.15716759092538	8.17156538723319e-09	3.94516302156095e-08	DOWN
ENSSSCG00000032423	SPOCK1	-1.46399705471539	0.0105668335378626	0.0209035213750416	DOWN
ENSSSCG00000011708	TSC22D2	-2.19708449674449	1.31057123907094e-13	1.04588886809549e-12	DOWN
ENSSSCG00000040863	IPMK	-1.57730557717555	5.32361190792754e-30	1.57771362294801e-28	DOWN
ENSSSCG00000037063	PROKR2	-1.99441478027215	5.62442438638398e-05	0.000167709867449451	DOWN
ENSSSCG00000037061	RRP1	-1.52454555315861	1.25898052194027e-18	1.58946290894959e-17	DOWN
ENSSSCG00000030548	HERC5	-1.6087802087952	4.57164561246954e-09	2.28311020005649e-08	DOWN
ENSSSCG00000013568	ARHGEF18	-1.31378061287526	2.5582102814753e-15	2.38005930756268e-14	DOWN
ENSSSCG00000027161	PIP5K1B	-1.49888475050954	0.0196523227297957	0.0365405853407467	DOWN
ENSSSCG00000013566	INSR	-1.60560408209362	1.20529612161718e-19	1.63974822579923e-18	DOWN
ENSSSCG00000004167	MYB	-2.9095243132436	3.09316357016698e-18	3.76941989125078e-17	DOWN
ENSSSCG00000036886	ZNF792	-1.41469226400452	5.66844313496721e-06	1.95637218641227e-05	DOWN
ENSSSCG00000037468	GNE	-1.17118799364993	1.29292514959045e-09	6.84123219345323e-09	DOWN
ENSSSCG00000003343	ATAD3A	-1.30256802641996	1.19901700178745e-27	3.02147497955419e-26	DOWN
ENSSSCG00000006927	PKN2	-1.22512530811112	6.41760174621499e-20	8.94285011544859e-19	DOWN
ENSSSCG00000013499	YJU2	-1.21695325540767	5.78781306775219e-13	4.33142501365568e-12	DOWN
ENSSSCG00000037608	LRRC70	-1.96775459919921	0.000264789959542832	0.000706610280961373	DOWN
ENSSSCG00000006821	GSTM3	-1.8749403286004	0.000531676200825151	0.00134706241930916	DOWN
ENSSSCG00000037602	SNRPB2	-1.32628851791733	2.34577858924704e-20	3.38075966772191e-19	DOWN
ENSSSCG00000006828	ATXN7L2	-1.63108437990037	3.31803704904856e-13	2.55428156977061e-12	DOWN
ENSSSCG00000013492	APBA3	-1.01923467533441	6.20406249151023e-07	2.41300951803194e-06	DOWN
ENSSSCG00000014825	RELT	-2.90148559224765	1.66959270528578e-30	5.09145118459734e-29	DOWN
ENSSSCG00000038006	SLC25A33	-2.37106038957162	1.0044287871945e-38	5.37326840607227e-37	DOWN
ENSSSCG00000012540	SLC25A53	-2.75088487489725	0.000121013460568807	0.000343633589671884	DOWN
ENSSSCG00000012549	RADX	-1.44430553551188	0.0261257598378604	0.0469988198850081	DOWN
ENSSSCG00000020702	SENP6	-1.43688873833873	3.49790055211508e-20	4.9563405690744e-19	DOWN
ENSSSCG00000032176	SMURF2	-1.72560807588514	2.67076071072279e-57	4.21479424660941e-55	DOWN
ENSSSCG00000038487	TMPO	-1.02531901143587	1.20645393472522e-05	3.95725667079915e-05	DOWN
ENSSSCG00000032171	TCF20	-1.29170120143361	4.60841088315719e-35	1.97224364067321e-33	DOWN
ENSSSCG00000002490	GSC	-1.71661256726593	0.000187527724872057	0.000514793982715747	DOWN
ENSSSCG00000002835	TOX3	-3.13204751989	3.2456258828516e-06	1.15230671459509e-05	DOWN
ENSSSCG00000030493	UTP23	-1.39696452174097	1.48368157774434e-16	1.55061919859456e-15	DOWN
ENSSSCG00000002836	SALL1	-2.68214473362116	3.27583052375259e-10	1.85459015077921e-09	DOWN
ENSSSCG00000031630	DPH7	-1.39293581978085	2.58368814469703e-15	2.4019928443888e-14	DOWN
ENSSSCG00000003374	ESPN	-2.83434472585246	2.89928619963665e-07	1.17431787842197e-06	DOWN
ENSSSCG00000007682	SH2B2	-1.7617646095737	2.06569082331455e-08	9.49030081671985e-08	DOWN
ENSSSCG00000013638	ILF3	-1.12952996790283	5.79815118111898e-36	2.69123745079511e-34	DOWN
ENSSSCG00000029203	TOX4	-1.01137342952147	1.42150174400066e-21	2.24611508360555e-20	DOWN
ENSSSCG00000002344	RIOX1	-1.11857457551456	6.12582300007299e-06	2.10044854361547e-05	DOWN
ENSSSCG00000025792	NOA1	-1.8278737879589	2.54099158023188e-31	8.28941051690633e-30	DOWN
ENSSSCG00000013382	PLEKHA7	-1.73543397882733	0.00471898316679947	0.0100399667139945	DOWN
ENSSSCG00000008887	NAF1	-1.64921390075969	1.93036838898986e-31	6.34658877890546e-30	DOWN
ENSSSCG00000025027	METTL1	-1.42822832195059	2.13853167479069e-12	1.51723230947113e-11	DOWN
ENSSSCG00000037284	CCDC85C	-2.95322004008651	1.3441659972673e-11	8.72498494370165e-11	DOWN
ENSSSCG00000016518	TRIM24	-1.20451190493479	9.07135635953839e-15	8.00320573299596e-14	DOWN
ENSSSCG00000016513	KIAA1549	-2.57554567139778	1.42729279057173e-34	5.92749061873949e-33	DOWN
ENSSSCG00000001905	ARID3B	-1.00857363052334	2.303924563939e-05	7.28268593383323e-05	DOWN
ENSSSCG00000021038	NRIP1	-1.14142735794828	6.74524591478105e-19	8.70743657199497e-18	DOWN
ENSSSCG00000003832	TACSTD2	-1.93621478326342	0.000269151398161924	0.000716885316834238	DOWN
ENSSSCG00000017249	SSTR2	-1.25155842698937	0.0133093105085969	0.0257162603567548	DOWN
ENSSSCG00000014934	CHORDC1	-3.17191390008516	1.40633114830432e-129	1.3657639036417e-126	DOWN
ENSSSCG00000008772	RELL1	-1.30664988990353	2.10638407659953e-24	4.16819733026161e-23	DOWN
ENSSSCG00000024261	CBX2	-2.98864849091121	2.18123225407513e-35	9.73076226420443e-34	DOWN
ENSSSCG00000016878	FGF10	-1.56858065303074	0.00447981524368387	0.00957955072010651	DOWN
ENSSSCG00000007331	RBL1	-1.14059334860849	6.04491647907288e-11	3.68325630059339e-10	DOWN
ENSSSCG00000024312	ID4	-1.20245055602023	2.24957431913165e-14	1.90866100665572e-13	DOWN
ENSSSCG00000039283	SIX3	-1.22880404856	4.38523309296982e-10	2.45079981402143e-09	DOWN
ENSSSCG00000016604	WASL	-1.45605806303647	3.7694735637603e-36	1.79583410348958e-34	DOWN
ENSSSCG00000006481	GPATCH4	-1.48222482720796	4.15807474758629e-17	4.5767823616632e-16	DOWN
ENSSSCG00000030153	SMURF1	-1.48577049838976	4.10868837217637e-32	1.42115590955415e-30	DOWN
ENSSSCG00000040581	CISH	-2.26674652740556	7.38050934094662e-10	4.02153346695947e-09	DOWN
ENSSSCG00000010606	SLK	-1.15029396810179	2.32126171162699e-13	1.81236419970876e-12	DOWN
ENSSSCG00000030156	APBB1IP	-1.92454076677145	1.06379446951963e-53	1.41372686080898e-51	DOWN
ENSSSCG00000002656	ZCCHC14	-1.60544130242962	4.76721794238976e-36	2.22089027758933e-34	DOWN
ENSSSCG00000039064	DHX33	-1.50611373121316	1.40321407815372e-20	2.0599508996152e-19	DOWN
ENSSSCG00000014088	IQGAP2	-1.48767806006207	6.86985004527404e-05	0.000202077951588035	DOWN
ENSSSCG00000001057	MCUR1	-1.11350207042702	5.03255621172071e-16	5.01468209731444e-15	DOWN
ENSSSCG00000006002	CCN3	-1.43051427380015	0.00735297239132651	0.0150212421424753	DOWN
ENSSSCG00000005664	LRRC8A	-1.25242563346862	1.58497233439406e-28	4.26658330953625e-27	DOWN
ENSSSCG00000021494	CDC25A	-1.97531476361191	8.94891717220036e-47	7.68571968020609e-45	DOWN
ENSSSCG00000006009	EXT1	-2.13431638495417	1.18595497485837e-81	3.9401793572597e-79	DOWN
ENSSSCG00000021361	ZNF710	-1.21631866219854	5.36060936250471e-15	4.80665434670611e-14	DOWN
ENSSSCG00000001873	CSPG4	-1.21962223264935	9.66548777227413e-26	2.1185205403639e-24	DOWN
ENSSSCG00000009592	NFIL3	-1.12257705573136	9.78701550580635e-20	1.34014176530157e-18	DOWN
ENSSSCG00000024445	METTL3	-1.17029812018118	4.64533460717187e-15	4.20712693081383e-14	DOWN
ENSSSCG00000022896	CRMP1	-1.15582207641259	0.0174399021181068	0.0328575980064317	DOWN
ENSSSCG00000005025	TRIM9	-1.52807475248529	0.000366608915993679	0.000954120297757205	DOWN
ENSSSCG00000000896	NTN4	-1.85775785165098	8.67047715886711e-25	1.7598838284678e-23	DOWN
ENSSSCG00000016319	GBX2	-2.91034178866938	6.27057472517589e-05	0.000185704916503274	DOWN
ENSSSCG00000027401	OPRD1	-2.04238173680691	0.000206723840250628	0.00056320322331436	DOWN
ENSSSCG00000013388	PDE3B	-1.40505174787882	5.2164752832826e-05	0.000156320912536062	DOWN
ENSSSCG00000033919	DCLK1	-1.60986429991915	1.16307624005745e-40	7.05953727438717e-39	DOWN
ENSSSCG00000006546	TDRD10	-2.6552004382278	0.000203790538485336	0.000555572349034198	DOWN
ENSSSCG00000034259	PMEPA1	-1.56229875438379	1.14376540948942e-39	6.50452175441619e-38	DOWN
ENSSSCG00000009042	OTUD4	-1.38128060689092	2.03100352023139e-28	5.432504119263e-27	DOWN
ENSSSCG00000010054	ADORA2A	-1.4059944817332	1.22082567723719e-08	5.76615195477725e-08	DOWN
ENSSSCG00000007995	MCRIP2	-1.62806719103927	4.21599749055506e-15	3.84032960449189e-14	DOWN
ENSSSCG00000007993	CAPN15	-1.85993754366306	7.3030855604113e-58	1.18206993846401e-55	DOWN
ENSSSCG00000000092	NPTXR	-1.0276796987814	2.50768055818675e-07	1.0235844502783e-06	DOWN
ENSSSCG00000017730	CDK5R1	-2.52162730763518	5.41593372109781e-10	2.99632617129096e-09	DOWN
ENSSSCG00000026422	GPER1	-2.4362496129122	2.93157871280436e-10	1.66942630803586e-09	DOWN
[truncated: 1,078 more rows]

## Sheet: Table S3-2
Table S3-2 Differentially expressed genes involved in fat-related pathways
Serial number	Gene ID	Ensembl Gene ID	GeneName	Log2FoldChange	pvalue	padjust	Pathway Description
Upregulated
1	397500	ENSSSCG00000007909	ABAT	1.75892214109139	0.00424571204998238	0.0091113572379785	Propanoate metabolism
							Butanoate metabolism
2	100152112	ENSSSCG00000005423	ABCA1	1.00401622261206	3.86851302176372e-11	2.41662428994394e-10	Fat digestion and absorption
3	100312959	ENSSSCG00000004510	ACAA2	2.54464613075192	1.88942181561657e-17	2.15872854499178e-16	Fatty acid metabolism
4	396931	ENSSSCG00000016156	ACADL	1.18919129105612	3.21307705832144e-11	2.0242064801052e-10	Fatty acid metabolism
							PPAR signaling pathway
5	100626793	ENSSSCG00000026153	ACAT1	1.82374090846984	7.18465100744308e-37	3.51574492127786e-35	Fatty acid metabolism
							Propanoate metabolism
							Butanoate metabolism
							Fat digestion and absorption
6	100739500	ENSSSCG00000023866	ACSF3	1.03379856344715	1.68123451209086e-05	5.41330928720917e-05	Fatty acid metabolism
7	397660	ENSSSCG00000039103	ADIPOQ	1.31654278060307	0.0276420053105198	0.0493283781572603	PPAR signaling pathway
8	613128	ENSSSCG00000001435	AGPAT1	1.28698848336919	1.01840184283466e-20	1.51798385664553e-19	Fat digestion and absorption
9	733635	ENSSSCG00000011147	AKR1C2	2.40759759346107	0.000359740298990189	0.000937597290411052	Arachidonic acid metabolism
10	100153301	ENSSSCG00000002357	ALDH6A1	1.58657941017717	4.73672533603738e-09	2.35995096162083e-08	Propanoate metabolism
11	396971	ENSSSCG00000017923	ALOX15	1.16601068589486	7.18552048817516e-06	2.43209641188234e-05	Arachidonic acid metabolism
12	397691	ENSSSCG00000030921	APOA1	1.29810599206262	0.00065756323744304	0.00164001103767649	PPAR signaling pathway
13	100142669	ENSSSCG00000004465	BCKDHB	1.22353481780601	0.0202646167576247	0.037507812133853	Propanoate metabolism
14	100522692	ENSSSCG00000022282	BDH2	2.36421256997587	5.81143613371347e-18	6.90210547395415e-17	Butanoate metabolism
15	100624868	ENSSSCG00000024388	BNIP3	1.27535971255653	1.68748992615078e-27	4.21872481537695e-26	FoxO signaling pathway
16	397568	ENSSSCG00000013302	CAT	1.96391678620087	7.27627128221412e-49	6.90698683744009e-47	FoxO signaling pathway
17	100512990	ENSSSCG00000012053	CBR3	1.21396825420468	0.000427205070231885	0.00109846517549441	Arachidonic acid metabolism
18	100153608	ENSSSCG00000009717	CBR4	1.03051794399558	0.00140973052491007	0.00330692082441279	Fatty acid metabolism
19	397662	ENSSSCG00000029326	CCNB1	2.14990573013418	2.98003002439596e-25	6.33381802323216e-24	FoxO signaling pathway
20	100135668	ENSSSCG00000004588	CCNB2	1.20169643584113	4.53890531533011e-05	0.000137517829628132	FoxO signaling pathway
21	100523979	ENSSSCG00000008988	CCNG2	1.82885765598502	6.63401550379367e-14	5.46700037437305e-13	FoxO signaling pathway
22	733702	ENSSSCG00000015405	CD36	1.14409160721326	4.89241982030212e-19	6.3874664148205e-18	PPAR signaling pathway
							Fat digestion and absorption
23	397227	ENSSSCG00000034120	CDKN2B	1.05541188578007	0.00824447634343109	0.0166912305702081	FoxO signaling pathway
24	100625953	ENSSSCG00000028671	CEL	1.23984974814469	0.0151494033071157	0.0289395092680186	Steroid biosynthesis
							Fat digestion and absorption
25	399528	ENSSSCG00000022364	CPT1B	1.16469212811433	5.53942087086313e-08	2.42577830366448e-07	Fatty acid metabolism
							PPAR signaling pathway
26	403104	ENSSSCG00000003006	CYP2B22	1.73045612149882	2.100397461588e-05	6.68115846625058e-05	Arachidonic acid metabolism
27	403111	ENSSSCG00000035347	CYP2C42	2.07532443481559	2.2710907787878e-07	9.31833639330384e-07	Arachidonic acid metabolism
28	100524750	ENSSSCG00000003825	CYP2J34	1.40208634590081	0.00283157653328353	0.00629599396490042	Arachidonic acid metabolism
29	403334	ENSSSCG00000015311	CYP51A1	1.22194529655436	8.09289734662097e-16	7.90811369977475e-15	Steroid biosynthesis
30	397212	ENSSSCG00000032213	DBI	1.21809326030778	3.82750074033089e-18	4.63300065644079e-17	PPAR signaling pathway
31	397118	ENSSSCG00000005918	DGAT1	1.10161528484955	7.65681116339912e-06	2.58192417035026e-05	Fat digestion and absorption
32	100627707	ENSSSCG00000021181	DHCR7	1.20510845539485	9.1262571030626e-06	3.04812158534829e-05	Steroid biosynthesis
33	100156927	ENSSSCG00000038086	ECHS1	1.11010411840413	8.8340097605414e-18	1.03077054738295e-16	Fatty acid metabolism
							Propanoate metabolism
							Butanoate metabolism
34	448846	ENSSSCG00000040296	EHHADH	1.31684522286179	2.39959792932998e-10	1.38332985652014e-09	Fatty acid metabolism
							Propanoate metabolism
							PPAR signaling pathway
							Butanoate metabolism
35	414425	ENSSSCG00000009666	EPHX2	1.3715210479765	1.21726968920887e-06	4.56430942270922e-06	Arachidonic acid metabolism
36	399533	ENSSSCG00000040681	FABP4	2.29088840447241	1.01673971998143e-16	1.0841502504025e-15	PPAR signaling pathway
37	444997	ENSSSCG00000013072	FADS2	1.26137367228593	6.12012900469704e-16	6.04117503395623e-15	Fatty acid metabolism
							PPAR signaling pathway
38	100620396	ENSSSCG00000023665	FBXO25	1.46113294453549	7.34689865639898e-07	2.82529989451834e-06	FoxO signaling pathway
39	733657	ENSSSCG00000005981	FBXO32	2.02091101621336	2.10884094697074e-05	6.70463786338595e-05	FoxO signaling pathway
40	100312971	ENSSSCG00000026044	FDFT1	1.17184621906256	2.41871447262629e-13	1.8861192227861e-12	Steroid biosynthesis
41	733705	ENSSSCG00000012399	FOXO4	1.16658436338416	1.48395384891955e-06	5.51189095104718e-06	FoxO signaling pathway
42	733669	ENSSSCG00000037066	GADD45A	1.6902934294744	3.08932630293409e-34	1.22650140171518e-32	FoxO signaling pathway
43	396968	ENSSSCG00000032985	GOT2	1.06705571244985	7.50301002283452e-20	1.03979694334013e-18	Fat digestion and absorption
44	397403	ENSSSCG00000033727	GPX1	2.44329026654262	8.80271006456055e-40	5.0515552075035e-38	Arachidonic acid metabolism
45	396598	ENSSSCG00000036438	GPX3	2.37767398916075	1.79932781768783e-12	1.28997806350419e-11	Arachidonic acid metabolism
46	100621417	ENSSSCG00000038094	GPX7	1.23658190272312	3.69095203599775e-25	7.72773954468849e-24	Arachidonic acid metabolism
47	100514687	ENSSSCG00000016049	HIBCH	1.66576697487772	8.58655544253509e-14	6.97588561531567e-13	Propanoate metabolism
48	397574	ENSSSCG00000028431	HSD17B4	1.20446794624322	1.38740787025063e-24	2.78917585380799e-23	Fatty acid metabolism
49	100154372	ENSSSCG00000001476	HSD17B8	1.25471256249815	0.00137778604562267	0.00323739974427437	Fatty acid metabolism
50	397491	ENSSSCG00000000857	IGF1	1.88147449851207	8.11267835222674e-10	4.39770563318431e-09	FoxO signaling pathway
51	100152180	ENSSSCG00000005016	L2HGDH	1.50830153991243	7.2070675993157e-14	5.90455732909544e-13	Butanoate metabolism
52	397537	ENSSSCG00000040631	LPL	1.14751659106465	3.50610432988052e-12	2.43747616545934e-11	PPAR signaling pathway
53	100625138	ENSSSCG00000021418	LSS	2.02411767111932	1.45312779854552e-40	8.736065931732e-39	Steroid biosynthesis
54	100521736	ENSSSCG00000009228	MAPK10	1.07175025492237	0.0274510303993796	0.0490752278097094	FoxO signaling pathway
55	445013	ENSSSCG00000040682	MAPK3	1.18818391576169	3.55950082332076e-20	5.03797061596688e-19	FoxO signaling pathway
56	100125959	ENSSSCG00000000488	MDM2	1.07131529109548	2.58262876536846e-22	4.30154197398111e-21	FoxO signaling pathway
57	396978	ENSSSCG00000016863	OXCT1	1.17918855634204	1.47398518168407e-05	4.78997758526675e-05	Butanoate metabolism
58	102162360	ENSSSCG00000011215	OXSM	1.65022934425847	1.24764441535186e-12	9.04739273050958e-12	Fatty acid metabolism
59	100524103	ENSSSCG00000009522	PCCA	1.14826011188429	6.37921571543564e-09	3.10835964520938e-08	Propanoate metabolism
60	403165	ENSSSCG00000002009	PCK2	2.3353800061645	8.25500805969024e-52	9.56141988565039e-50	FoxO signaling pathway
							PPAR signaling pathway
61	100514711	ENSSSCG00000000110	PLA2G6	1.11435510772752	4.40756568257207e-05	0.000133698983042942	Arachidonic acid metabolism
62	396953	ENSSSCG00000026748	PLK1	2.59534422731291	5.73775440908893e-41	3.58609650568058e-39	FoxO signaling pathway
63	100515451	ENSSSCG00000016912	PLPP1	1.12898887746348	9.81503861235973e-25	1.98263779969666e-23	Fat digestion and absorption
64	100517533	ENSSSCG00000036673	PPT1	1.01737438695331	1.87568482872044e-11	1.20327850419693e-10	Fatty acid metabolism
65	100126284	ENSSSCG00000007463	PTGIS	1.96126858114281	1.06190742291891e-42	7.48971017561524e-41	Arachidonic acid metabolism
66	397541	ENSSSCG00000005533	PTGS1	1.97022959156838	9.58115115142633e-23	1.65928715070998e-21	Arachidonic acid metabolism
67	100156801	ENSSSCG00000001474	RXRB	1.32702666008079	2.70368655966142e-17	3.04224980532312e-16	PPAR signaling pathway
68	100520925	ENSSSCG00000028517	SC5D	1.10395745908239	2.59737273190963e-10	1.48986055158379e-09	Steroid biosynthesis
69	396670	ENSSSCG00000010554	SCD	1.78937951450815	1.71602139700668e-42	1.18386722061253e-40	Fatty acid metabolism
							PPAR signaling pathway
70	397439	ENSSSCG00000027114	SCP2	1.64650130019079	1.87805649674016e-29	5.30435419940593e-28	Fatty acid metabolism
							PPAR signaling pathway
71	397026	ENSSSCG00000011501	SUCLG2	1.10040162077089	2.19781934942446e-23	4.04482059569735e-22	Propanoate metabolism
72	397400	ENSSSCG00000002385	TGFB3	1.78733621388594	1.88263127353603e-15	1.76978554195029e-14	FoxO signaling pathway
73	100627715	ENSSSCG00000032648	RBL2	1.49807203409257	1.99643127467904e-11	1.27555388880682e-10	FoxO signaling pathway
Down regulated
1	100624934	ENSSSCG00000016726	ADCY1	-1.41625734832222	0.0148921111978197	0.0284868036170415	cAMP signaling pathway
2	100511793	ENSSSCG00000016672	ADCYAP1R1	-2.36691406948205	0.000131235566008939	0.000369689111849529	cAMP signaling pathway
3	503661	ENSSSCG00000010054	ADORA2A	-1.4059944817332	1.22082567723719e-08	5.76615195477725e-08	cAMP signaling pathway
4	396730	ENSSSCG00000015753	ANGPT2	-1.33262409161863	0.00119557817246715	0.00284205882647294	PI3K-Akt signaling pathway
							MAPK signaling pathway
5	100511744	ENSSSCG00000014391	ARAP3	-2.1908667213096	1.84747002631392e-15	1.74062008076218e-14	cAMP signaling pathway
6	100170767	ENSSSCG00000017918	ARRB2	-1.35193113052605	4.68301488638016e-11	2.8896902707991e-10	MAPK signaling pathway
7	397636	ENSSSCG00000027898	ATP2B1	-1.73160956063383	1.26368913056234e-37	6.40725914592352e-36	cAMP signaling pathway
8	100523725	ENSSSCG00000023204	AXIN1	-1.18212018149934	2.9537247464707e-23	5.36557912578311e-22	Hippo signaling pathway
							Wnt signaling pathway
9	100739604	ENSSSCG00000017265	AXIN2	-2.44381473482173	1.09981512293093e-11	7.22057510504578e-11	Hippo signaling pathway
							Wnt signaling pathway
10	449001	ENSSSCG00000011014	BAMBI	-2.280797577416	5.40197506550054e-16	5.36009309221073e-15	TGF-beta signaling pathway
							Wnt signaling pathway
11	397495	ENSSSCG00000013333	BDNF	-1.53266874837242	0.00365110098420132	0.00794656307947166	cAMP signaling pathway
							PI3K-Akt signaling pathway
							MAPK signaling pathway
12	100155536	ENSSSCG00000001027	BMP6	-1.23741885771421	0.0226322071255502	0.0412906958034786	Hippo signaling pathway
							TGF-beta signaling pathway
13	396691	ENSSSCG00000029621	BMPR1B	-2.96654472491177	1.59336591502894e-38	8.48786695242211e-37	Hippo signaling pathway
							TGF-beta signaling pathway
14	100524101	ENSSSCG00000011040	CACNB2	-1.38851954312449	0.0172560038917227	0.0325402612595966	MAPK signaling pathway
15	100519266	ENSSSCG00000015504	CACYBP	-1.49065019165976	4.513542631275e-45	3.65278690511839e-43	Wnt signaling pathway
16	100512048	ENSSSCG00000006095	CCNE2	-2.11982730868088	1.43662928301121e-34	5.94670317967755e-33	PI3K-Akt signaling pathway
17	100141402	ENSSSCG00000013647	CDC37	-1.12935419737603	3.04980744991815e-29	8.51854403876474e-28	PI3K-Akt signaling pathway
18	100154715	ENSSSCG00000037597	CDK2	-1.21869746491788	1.40555063690782e-28	3.80795639291013e-27	PI3K-Akt signaling pathway
19	100515635	ENSSSCG00000016690	CREB5	-1.41334314524597	3.38897692089976e-17	3.76967697148541e-16	cAMP signaling pathway
							PI3K-Akt signaling pathway
20	100620215	ENSSSCG00000007951	CREBBP	-1.0736042983679	1.48915182109462e-24	2.97948363570834e-23	cAMP signaling pathway
							TGF-beta signaling pathway
							Wnt signaling pathway
21	100737256	ENSSSCG00000002804	CSNK2A2	-1.54619764275139	7.1454478870953e-45	5.70957465661887e-43	Wnt signaling pathway
22	100517978	ENSSSCG00000016780	CTNND2	-1.36636136200972	0.00684528417471073	0.0140689377328436	Wnt signaling pathway
23	100144487	ENSSSCG00000029037	DRD1	-3.92942918456396	2.521757483105e-31	8.24797622388619e-30	cAMP signaling pathway
24	100517416	ENSSSCG00000010831	DUSP10	-1.2877124277425	3.09085576108865e-10	1.7561680460731e-09	MAPK signaling pathway
25	100620494	ENSSSCG00000032097	DUSP16	-1.81457655859198	1.75592261292409e-46	1.4681141051766e-44	MAPK signaling pathway
26	100622812	ENSSSCG00000035971	DUSP2	-2.88724788570693	3.57085443676153e-07	1.42845491964874e-06	MAPK signaling pathway
27	100157144	ENSSSCG00000040815	DUSP5	-1.3239067422859	0.0275846163367911	0.0492571546990438	MAPK signaling pathway
28	100522677	ENSSSCG00000002787	E2F4	-1.38741610530663	3.5329722421813e-24	6.84106971741394e-23	TGF-beta signaling pathway
29	100157957	ENSSSCG00000006145	E2F5	-1.13459322420185	0.000268136265557064	0.000714482978610793	TGF-beta signaling pathway
30	100519412	ENSSSCG00000013615	ECSIT	-1.27459566742949	1.93333410016606e-16	1.99921276563772e-15	MAPK signaling pathway
31	100512036	ENSSSCG00000038701	EFNA2	-1.24562414956478	0.000224028708078375	0.000606034377435073	PI3K-Akt signaling pathway
							MAPK signaling pathway
32	397070	ENSSSCG00000022126	EGFR	-1.74238740907843	1.00335732247146e-41	6.56341253689235e-40	PI3K-Akt signaling pathway
							MAPK signaling pathway
33	100620969	ENSSSCG00000038185	EREG	-1.52332492664739	1.38846543157726e-08	6.51892007202043e-08	PI3K-Akt signaling pathway
							MAPK signaling pathway
34	397561	ENSSSCG00000029944	FASN	-1.02272083758463	4.10916477850131e-26	9.26396523724626e-25	Insulin signaling pathway
35	100525086	ENSSSCG00000016878	FGF10	-1.56858065303074	0.00447981524368387	0.00957955072010651	PI3K-Akt signaling pathway
							MAPK signaling pathway
36	100525013	ENSSSCG00000016997	FGF18	-1.56208931565526	0.000837142911938325	0.00205102450285685	PI3K-Akt signaling pathway
							MAPK signaling pathway
37	100514115	ENSSSCG00000030827	FGFR3	-1.28165425383851	4.43178953688834e-21	6.77377032726577e-20	PI3K-Akt signaling pathway
							MAPK signaling pathway
38	396763	ENSSSCG00000009320	FLT1	-1.54962198681052	7.21530205894103e-13	5.35195484496378e-12	PI3K-Akt signaling pathway
							MAPK signaling pathway
39	100525205	ENSSSCG00000012967	FOSL1	-1.20549183953333	2.18100673317729e-14	1.8542228960514e-13	Wnt signaling pathway
40	110256599	ENSSSCG00000038904	FRAT2	-1.19617385904792	0.00052762889264578	0.00133788205857662	Wnt signaling pathway
41	100153078	ENSSSCG00000009679	FZD3	-2.38696795579259	3.52597332950175e-05	0.000108786444977907	Hippo signaling pathway
							Wnt signaling pathway
42	100519058	ENSSSCG00000016140	FZD5	-3.11699367883269	1.22335387868782e-29	3.54239511890681e-28	Hippo signaling pathway
							Wnt signaling pathway
43	110255708	ENSSSCG00000033001	FZD8	-2.40056974620155	1.93469225994283e-11	1.23924352013081e-10	Hippo signaling pathway
							Wnt signaling pathway
44	100625784	ENSSSCG00000023004	FZD9	-2.77013070510101	6.00656306651212e-07	2.33835518700942e-06	Hippo signaling pathway
							Wnt signaling pathway
45	100511175	ENSSSCG00000027558	GABBR2	-2.46564584621398	3.19818832087198e-23	5.77641309742614e-22	cAMP signaling pathway
46	100514142	ENSSSCG00000016751	GCK	-1.86282208858659	1.07414187770593e-10	6.38467100095921e-10	Insulin signaling pathway
47	110260254	ENSSSCG00000034943	GDF6	-3.02243381835201	2.65189872070312e-16	2.72418399909495e-15	Hippo signaling pathway
							TGF-beta signaling pathway
48	100156280	ENSSSCG00000033657	GREM1	-1.67918680001134	1.08871605612174e-13	8.74922992268423e-13	TGF-beta signaling pathway
49	100525120	ENSSSCG00000015403	HGF	-1.22067307984904	0.0116657252059652	0.0228624310346648	PI3K-Akt signaling pathway
							MAPK signaling pathway
50	494561	ENSSSCG00000008261	HK2	-1.15997585892753	3.43865093038132e-24	6.66865867835086e-23	Insulin signaling pathway
51	397028	ENSSSCG00000002535	HSP90AA1	-2.41106484990066	4.01525472051915e-130	4.22438257054619e-127	PI3K-Akt signaling pathway
52	396742	ENSSSCG00000001701	HSP90AB1	-1.02105664178474	3.82516142092711e-31	1.23827340869756e-29	PI3K-Akt signaling pathway
53	396906	ENSSSCG00000047932	HSPA6	-4.02309311567484	3.8023275948544e-24	7.33458783258712e-23	MAPK signaling pathway
54	100511890	ENSSSCG00000015140	HSPA8	-2.98571026684104	1.72350902323944e-255	4.3518602836796e-252	MAPK signaling pathway
55	493184	ENSSSCG00000039962	HSPB1	-2.20930993225945	6.12529263796395e-114	4.83323872214343e-111	MAPK signaling pathway
56	100144508	ENSSSCG00000024312	ID4	-1.20245055602023	2.24957431913165e-14	1.90866100665572e-13	TGF-beta signaling pathway
57	100628318	ENSSSCG00000021206	IL1RAP	-2.57147089464197	4.69769025972543e-93	1.97694465096779e-90	MAPK signaling pathway
58	399522	ENSSSCG00000027628	IL6R	-1.16205126024217	3.68350882463192e-06	1.29646777003005e-05	PI3K-Akt signaling pathway
59	397093	ENSSSCG00000035077	INHBA	-1.3978048116532	1.93081349899035e-17	2.20203436537969e-16	TGF-beta signaling pathway
60	396755	ENSSSCG00000013566	INSR	-1.60560408209362	1.20529612161718e-19	1.63974822579923e-18	Insulin signaling pathway
							PI3K-Akt signaling pathway
							MAPK signaling pathway
61	396606	ENSSSCG00000012795	IRAK1	-1.52358098053869	1.1688351932409e-31	3.89354731257687e-30	MAPK signaling pathway
62	110255858	ENSSSCG00000034763	IRS2	-1.89582583347773	6.04013655579473e-29	1.66499397416831e-27	Insulin signaling pathway
63	100158200	ENSSSCG00000015955	ITGA6	-1.53088832922023	3.25573795782133e-05	0.000101215690020917	PI3K-Akt signaling pathway
64	100037284	ENSSSCG00000015375	ITGB8	-1.69398335387715	2.94707394853652e-47	2.60187472729185e-45	PI3K-Akt signaling pathway
65	397201	ENSSSCG00000005215	JAK2	-1.0751608733363	7.25453019390055e-14	5.93958778845619e-13	PI3K-Akt signaling pathway
66	396810	ENSSSCG00000008842	KIT	-1.41996595175238	0.0249771590194178	0.0451418160293316	PI3K-Akt signaling pathway
							MAPK signaling pathway
67	100170126	ENSSSCG00000009148	LEF1	-1.86241669205788	2.99995021351342e-10	1.70682160638157e-09	Hippo signaling pathway
							Wnt signaling pathway
68	100151994	ENSSSCG00000030511	LGR5	-1.42136095125625	0.0185842609778675	0.0347491550422952	Wnt signaling pathway
69	397583	ENSSSCG00000003018	LIPE	-1.27548470669565	1.20872495790577e-08	5.71541295638965e-08	cAMP signaling pathway
							Insulin signaling pathway
70	396617	ENSSSCG00000016918	MAP3K1	-1.40880441310376	1.35144262158386e-20	1.99089417707073e-19	MAPK signaling pathway
71	100736741	ENSSSCG00000037531	MAP3K11	-1.39306110563041	2.64191209745429e-18	3.25089086065891e-17	MAPK signaling pathway
72	100513491	ENSSSCG00000024813	MAP3K3	-2.15315855478382	2.67360585946288e-63	5.27410530870607e-61	MAPK signaling pathway
73	100622769	ENSSSCG00000026041	MAP3K5	-2.82340158056605	1.17866061757094e-87	4.50926978691913e-85	MAPK signaling pathway
74	100512235	ENSSSCG00000003573	MAP3K6	-1.09847617050072	0.000280602505032413	0.000743308146461228	MAPK signaling pathway
75	396610	ENSSSCG00000010380	MAPK8	-2.53322153425677	2.0943919759747e-75	6.00947697651832e-73	cAMP signaling pathway
							Insulin signaling pathway
							Wnt signaling pathway
							MAPK signaling pathway
76	100521986	ENSSSCG00000015650	MAPKAPK2	-1.0923680761551	2.92374255857477e-14	2.45753993355569e-13	MAPK signaling pathway
77	100518275	ENSSSCG00000011743	MECOM	-1.20877508936353	4.10934836725136e-07	1.63351773099963e-06	MAPK signaling pathway
78	654328	ENSSSCG00000024351	MET	-1.67783571808767	1.37353240143286e-27	3.44748440717493e-26	PI3K-Akt signaling pathway
							MAPK signaling pathway
79	100152439	ENSSSCG00000004167	MYB	-2.9095243132436	3.09316357016698e-18	3.76941989125078e-17	PI3K-Akt signaling pathway
80	448810	ENSSSCG00000005965	MYC	-1.31894858451561	0.0142370040918502	0.027316440221825	Hippo signaling pathway
							TGF-beta signaling pathway
							Wnt signaling pathway
							PI3K-Akt signaling pathway
							MAPK signaling pathway
81	100738968	ENSSSCG00000032417	NGF	-1.24757852450348	0.011737152271072	0.0229845738207358	PI3K-Akt signaling pathway
							MAPK signaling pathway
82	100525607	ENSSSCG00000017548	NGFR	-1.83156746985304	0.000241867525948863	0.0006502507485316	PI3K-Akt signaling pathway
							MAPK signaling pathway
83	574073	ENSSSCG00000036437	NOG	-1.86413409098346	1.02363428571586e-05	3.3937454982045e-05	TGF-beta signaling pathway
84	110255930	ENSSSCG00000039013	NOTUM	-1.87972540285003	4.13976528900636e-05	0.000126334389107337	Wnt signaling pathway
85	100154923	ENSSSCG00000034510	ORAI1	-1.00661606250143	9.35486506390837e-10	5.03861652866225e-09	cAMP signaling pathway
86	397092	ENSSSCG00000021585	OXTR	-1.53017837287057	6.35360819933405e-18	7.52479395089984e-17	cAMP signaling pathway
87	100154378	ENSSSCG00000004027	PDE10A	-1.87094167709689	0.000513299560162837	0.00130469235898043	cAMP signaling pathway
88	100516060	ENSSSCG00000013388	PDE3B	-1.40505174787882	5.2164752832826e-05	0.000156320912536062	cAMP signaling pathway
							Insulin signaling pathway
89	100037967	ENSSSCG00000016929	PDE4D	-1.83063061106029	2.08129343321926e-23	3.83596052472893e-22	cAMP signaling pathway
90	100628113	ENSSSCG00000002739	PHLPP2	-1.54508952848141	6.05177986611163e-23	1.07158093702187e-21	PI3K-Akt signaling pathway
91	100155165	ENSSSCG00000010509	PIK3AP1	-1.68601192188088	4.27767878350987e-05	0.000130134203956174	PI3K-Akt signaling pathway
92	100622559	ENSSSCG00000021203	PIK3CB	-1.40654995655784	6.95104558583349e-11	4.21908415967057e-10	cAMP signaling pathway
							Insulin signaling pathway
							PI3K-Akt signaling pathway
93	100623707	ENSSSCG00000016958	PIK3R1	-1.354650328089	6.98524967067708e-21	1.05362935594144e-19	cAMP signaling pathway
							Insulin signaling pathway
							PI3K-Akt signaling pathway
94	100511937	ENSSSCG00000003909	PIK3R3	-1.39791825039525	6.75642776362331e-06	2.30353498557236e-05	cAMP signaling pathway
							Insulin signaling pathway
							PI3K-Akt signaling pathway
95	100154766	ENSSSCG00000006927	PKN2	-1.22512530811112	6.41760174621499e-20	8.94285011544859e-19	PI3K-Akt signaling pathway
96	733612	ENSSSCG00000009828	PPP1CC	-1.50344722197258	5.62905664187848e-41	3.53566368675203e-39	cAMP signaling pathway
							Hippo signaling pathway
							Insulin signaling pathway
97	100736966	ENSSSCG00000017498	PPP1R1B	-1.13732936144939	1.48716986820267e-06	5.52221164295846e-06	cAMP signaling pathway
98	397136	ENSSSCG00000015842	PPP2CB	-1.57670609499792	1.44656532026744e-46	1.2175258112251e-44	Hippo signaling pathway
							TGF-beta signaling pathway
							PI3K-Akt signaling pathway
99	397090	ENSSSCG00000009657	PPP2R2A	-1.24056234556613	1.36453600127411e-25	2.94987448905576e-24	Hippo signaling pathway
							PI3K-Akt signaling pathway
100	100627504	ENSSSCG00000027312	PTCH1	-1.66033006787691	3.29875537620021e-09	1.67054900218723e-08	cAMP signaling pathway
101	396811	ENSSSCG00000003788	PTGER3	-2.8006605955328	2.04614708500633e-21	3.2010665363327e-20	cAMP signaling pathway
102	396667	ENSSSCG00000007469	PTPN1	-1.13381242097601	7.74054377663136e-20	1.07153909188565e-18	Insulin signaling pathway
103	100620989	ENSSSCG00000023526	RAPGEF3	-1.59956661199815	0.0092200624219199	0.0184474307570109	cAMP signaling pathway
104	100515414	ENSSSCG00000011672	RASA2	-1.1552039612433	2.53266945097405e-11	1.60436286094066e-10	MAPK signaling pathway
105	100153296	ENSSSCG00000007331	RBL1	-1.14059334860849	6.04491647907288e-11	3.68325630059339e-10	TGF-beta signaling pathway
106	100737299	ENSSSCG00000014176	RGMB	-1.90430152663601	6.14892409495696e-55	8.82160985213996e-53	TGF-beta signaling pathway
107	397445	ENSSSCG00000008629	ROCK2	-1.1098565011602	2.65630657892933e-19	3.54127461024106e-18	cAMP signaling pathway
							Wnt signaling pathway
108	100520620	ENSSSCG00000003811	ROR1	-1.12587446876755	3.60072303267934e-08	1.61259766894561e-07	Wnt signaling pathway
109	100512677	ENSSSCG00000017139	RPTOR	-1.31123083778794	1.31003372842615e-26	3.05714895034752e-25	Insulin signaling pathway
							PI3K-Akt signaling pathway
110	100625739	ENSSSCG00000021443	SGK1	-1.26500256487112	1.08956805376573e-21	1.73028889041412e-20	PI3K-Akt signaling pathway
111	100519708	ENSSSCG00000007682	SH2B2	-1.7617646095737	2.06569082331455e-08	9.49030081671985e-08	Insulin signaling pathway
112	102164918	ENSSSCG00000039841	SHC3	-1.82468876515223	0.00113635692637702	0.00271149238244374	Insulin signaling pathway
113	100521305	ENSSSCG00000004507	SMAD7	-2.04252110396251	5.62717740688275e-11	3.4420113741228e-10	Hippo signaling pathway
							TGF-beta signaling pathway
114	100621443	ENSSSCG00000030153	SMURF1	-1.48577049838976	4.10868837217637e-32	1.42115590955415e-30	TGF-beta signaling pathway
115	100627676	ENSSSCG00000032176	SMURF2	-1.72560807588514	2.67076071072279e-57	4.21479424660941e-55	TGF-beta signaling pathway
116	493186	ENSSSCG00000036956	SOCS3	-2.20780001793348	2.0035518075984e-05	6.3875862552853e-05	Insulin signaling pathway
117	100153151	ENSSSCG00000010494	SORBS1	-1.11447499467995	0.00766609093710555	0.0156129049977347	Insulin signaling pathway
118	100156602	ENSSSCG00000005015	SOS2	-1.07126071593578	2.67924167733834e-10	1.53472895537189e-09	Insulin signaling pathway
							PI3K-Akt signaling pathway
							MAPK signaling pathway
119	100154087	ENSSSCG00000006256	SOX17	-2.36867493391338	0.000231736897813561	0.000624877901515635	Wnt signaling pathway
120	397004	ENSSSCG00000001938	SSTR1	-2.59748878688989	3.28231051042937e-12	2.28566851594985e-11	cAMP signaling pathway
121	100625732	ENSSSCG00000024174	TGIF1	-1.05587177179921	4.73840755645493e-13	3.5843256680793e-12	TGF-beta signaling pathway
122	110257437	ENSSSCG00000036002	TGIF2	-2.22062285947793	2.17673665493303e-18	2.69424512436563e-17	TGF-beta signaling pathway
123	100154048	ENSSSCG00000004971	TLE3	-1.26363174487134	1.23310093070495e-26	2.88294430558333e-25	Wnt signaling pathway
124	100156044	ENSSSCG00000005288	TLE4	-1.25804815245246	8.33526777250399e-22	1.33374848704516e-20	Wnt signaling pathway
125	399541	ENSSSCG00000005503	TLR4	-1.15015148346386	0.0135733855082158	0.0261744298214793	PI3K-Akt signaling pathway
126	397086	ENSSSCG00000001404	TNF	-1.47631469394198	0.0212397784175135	0.0390266631525408	TGF-beta signaling pathway
							MAPK signaling pathway
127	100519863	ENSSSCG00000010894	TP53BP2	-2.05986146697059	8.23248938999877e-80	2.59837946371836e-77	Hippo signaling pathway
128	102165390	ENSSSCG00000025685	TP73	-2.88417364937182	1.55198337026214e-11	1.00070429262306e-10	Hippo signaling pathway
129	100158100	ENSSSCG00000006383	VANGL2	-2.10371217917979	0.000338236690588402	0.000885206927586769	Wnt signaling pathway
130	100151826	ENSSSCG00000023187	VAV3	-3.43967073186231	7.41626877365226e-16	7.27508883196269e-15	cAMP signaling pathway
131	397157	ENSSSCG00000001695	VEGFA	-1.58484934156958	1.89611731966883e-05	6.06037497742252e-05	PI3K-Akt signaling pathway
							MAPK signaling pathway
132	100521912	ENSSSCG00000022347	WNT11	-1.20666640764134	0.0020616489115577	0.0047067481932036	Hippo signaling pathway
							Wnt signaling pathway
133	100520560	ENSSSCG00000006780	WNT2B	-1.22552227896452	1.18388111781485e-07	5.01223980966213e-07	Hippo signaling pathway
							Wnt signaling pathway
134	100519512	ENSSSCG00000017317	WNT3	-1.0431186890964	0.026848359325463	0.0481820236650988	Hippo signaling pathway
							Wnt signaling pathway
135	100627056	ENSSSCG00000035859	WNT5A	-1.31458714909575	1.02678168375455e-17	1.19255922331197e-16	Hippo signaling pathway
							Wnt signaling pathway
136	100626947	ENSSSCG00000027365	WNT7B	-2.64465313071877	7.8284661664245e-06	2.63628661912802e-05	Hippo signaling pathway
							Wnt signaling pathway
137	110261274	ENSSSCG00000039166	WTIP	-1.26150531287333	1.88890230645129e-15	1.7743594954574e-14	Hippo signaling pathway
138	100513827	ENSSSCG00000035456	WWC1	-1.88708792234919	1.12998935318874e-05	3.7219190148729e-05	Hippo signaling pathway
139	100153654	ENSSSCG00000009971	ZNRF3	-2.57727479961303	9.28656501551471e-44	6.97874305481388e-42	Wnt signaling pathway
