# Supplementary material for: Characterization of a Read-through Fusion Transcript, BCL2L2-PABPN1, Involved in Porcine Adipogenesis
Source: Genes (Basel). 2022 Feb 28;13(3):445. doi: 10.3390/genes13030445 (PMC8955228; doi:10.3390/genes13030445)
Supplement: Supplementary file 1 [file genes-13-00445-s001.zip › Table S4.xlsx]

## Sheet: Table S4-1
Table S4-1 miRNAs identified in this study
#miRNA	read_count	precursor	total	BP-1	BP-2	BP-3	C-1	C-2	C-3	BP-1(norm)	BP-2(norm)	BP-3(norm)	C-1(norm)	C-2(norm)	C-3(norm)	mature	hairpin
Known miRNA
ssc-miR-186-3p	1	ssc-mir-186	1	0	0	1	0	0	0	0	0	0.08	0	0	0	GCCCAAAGGUGAAUUUUUUGGG	UGCUUAUAACUUUCCAAAGAAUUCUCCUUUUGGGCUUUAUGAUUUUAUUUUAAGCCCAAA
ssc-miR-371-5p	1	ssc-mir-371	1	1	0	0	0	0	0	0.06	0	0	0	0	0	ACUCAAACUGUGGGGGCACUUU	AGCCUGUGGUACUCAAACUGUGGGGGCACUUUCUGGUCUAGGGAGGGAAGUGCCGCCAUU
ssc-miR-432-3p	1	ssc-mir-432	1	0	0	0	0	0	1	0	0	0	0	0	0.11	UGGAUGGCUCCUCCAUGGCU	UCCAGGUCUUGGAGUAGGUCAUUGGGUGGAUCCUUUAUUUCCCUAUGUGGGCCACUGGAU
ssc-miR-9788-3p	1	ssc-mir-9788-1	1	1	0	0	0	0	0	0.06	0	0	0	0	0	AGAGGAGAGGCUACCACCACCA	AGGGGGAGGUGGACCCCACCCAGGUAGGUGCGGCCCCUUCGUUCUACCCCCGGAGCCCAC
ssc-miR-217	2	ssc-mir-217-1	2	0	2	0	0	0	0	0	0.16	0	0	0	0	UACUGCAUCAGGAACUGAUUGGAU	AUAAUUAUUACAGAGUUUUUGAUGUCGCAGAUACUGCAUCAGGAACUGAUUGGAUAAGAA
ssc-miR-338	2	ssc-mir-338	2	2	0	0	0	0	0	0.12	0	0	0	0	0	UCCAGCAUCAGUGAUUUUGUUG	CCGUCCUCCCCAACAAUAUCCUGGUGCUGAGUGAUGACACACGCAACUCCAGCAUCAGUG
ssc-miR-376a-5p	2	ssc-mir-376a	2	0	0	2	0	0	0	0	0	0.16	0	0	0	GUAGAUUCUCCUUCUAUGAGUAC	GGUAUUUAAAAGGUAGAUUCUCCUUCUAUGAGUACAUUAUUUAUUAUUAAUCAUAGAGGA
ssc-miR-499-3p	2	ssc-mir-499	2	0	0	2	0	0	0	0	0	0.16	0	0	0	AACAUCACAGCAAGUCUGUGCU	UGGGCGGGCGGCCGUUAAGACUUGCAGUGAUGUUUAACUCCUCUCCACGUGAACAUCACA
ssc-miR-153	3	ssc-mir-153	3	0	0	3	0	0	0	0	0	0.24	0	0	0	UUGCAUAGUCACAAAAGUGA	AGCGGUGGCCAGUGUCAUUUUUGUGAUGUUGCAGCUAGUAAUAUGAGCCCAGUUGCAUAG
ssc-miR-670	3	ssc-mir-670	3	0	0	0	0	3	0	0	0	0	0	0.34	0	UUUCCUCAUAUUCAUUCAGGAGUG	CUGACAUCCCUGAGUGUAUGUGGUGAACCUGAAUUUGCCUUGGGUUUCCUCAUAUUCAUU
ssc-miR-138	4	ssc-mir-138	4	0	4	0	0	0	0	0	0.31	0	0	0	0	AGCUGGUGUUGUGAAUCAGGC	GCGGUGGGGCAGCUGGUGUUGUGAAUCAGGCCGUUGCCAAUCAGAGAACGGCUACUUCAC
ssc-miR-141	4	ssc-mir-141	4	1	0	0	3	0	0	0.06	0	0	0.3	0	0	UAACACUGUCUGGUAAAGAUG	CCAUCUUCCAGCACAGUGUUGGAUGGUCUAAUAGUGAAGCUCCUAACACUGUCUGGUAAA
ssc-miR-31	4	ssc-mir-31	4	1	0	3	0	0	0	0.06	0	0.24	0	0	0	AGGCAAGAUGCUGGCAUAGCUG	ACUGGAGAGGAGGCAAGAUGCUGGCAUAGCUGUUAAACUGAGAACCUGCUAUGCCAACAU
ssc-miR-381-5p	4	ssc-mir-381	4	0	0	4	0	0	0	0	0	0.32	0	0	0	AGCGAGGUUGCCCUUUGUAUAUU	UGGUACUUAAAGCGAGGUUGCCCUUUGUAUAUUCGGGUUUUGAGGUGGAAUAUACAAGGA
ssc-miR-9851-3p	4	ssc-mir-9851	4	0	0	1	3	0	0	0	0	0.08	0.3	0	0	UGGCACCAGCACUGGCGGUGGC	UGAGCCCGGCGCUGGCAGUGUUGGUGGCACUCGUGUGGUGGCAGUGGCACCAGCACUGGC
ssc-miR-200b	5	ssc-mir-200b	5	3	1	1	0	0	0	0.18	0.08	0.08	0	0	0	UAAUACUGCCUGGUAAUGAUGAC	CCGCCAUCUUACUGGGCAGCAUUGGAUGGUGUCUGGUCUCUAAUACUGCCUGGUAAUGAU
ssc-miR-451	5	ssc-mir-451	5	0	0	3	0	2	0	0	0	0.24	0	0.23	0	AAACCGUUACCAUUACUGAGUU	GGGGGUGGCGAGCAAACCGUUACCAUUACUGAGUUUAGUAAUGGUAACGGUUCUCUUGCU
ssc-miR-545-3p	5	ssc-mir-545	5	1	1	3	0	0	0	0.06	0.08	0.24	0	0	0	AUCAACAAACAUUUAUUGUGUG	UUAGUAGGCCUCAGUAAAUGUUUAUUGGAUGAAUAAAUGAAUGACUCAUCAACAAACAUU
ssc-miR-9785-5p	5	ssc-mir-9785	5	2	0	3	0	0	0	0.12	0	0.24	0	0	0	ACCCUCAUCCUGGUGUCCGGCACC	CUCAGAGUUCACCCUCAUCCUGGUGUCCGGCACCACUGUACAAACUUGCUGCCCACCUGG
ssc-miR-205	6	ssc-mir-205	6	0	2	1	3	0	0	0	0.16	0.08	0.3	0	0	UCCUUCAUUCCACCGGAGUCUG	CUCUUGUCCUUCAUUCCACCGGAGUCUGUCUCAUACCCAACCAGAUUUCAGUGGAGUGAA
ssc-miR-7140-5p	6	ssc-mir-7140	6	0	4	2	0	0	0	0	0.31	0.16	0	0	0	CAACUCAAGGGGGCAUCAUUCA	CAACUCAAGGGGGCAUCAUUCACUUCAUAGUCUCUGUGAAUGAUGCCCCUUAGAGUUGAG
ssc-miR-376c	7	ssc-mir-376c	7	0	5	2	0	0	0	0	0.39	0.16	0	0	0	GUGGAUAUUCCUUCUAUGUUUA	UAUUUAAAAGGUGGAUAUUCCUUCUAUGUUUAUGUUAUUUGUGGUUAAACAUAGAGGAAA
ssc-miR-1271-3p	8	ssc-mir-1271	8	6	2	0	0	0	0	0.36	0.16	0	0	0	0	UGCCUGCUAUGUGCCAGGCA	UAGAUCAGUGCUUGGCACCUAGUAAGCACUCAGUAUAUACUUGUUGAGUGCCUGCUAUGU
ssc-miR-487b	8	ssc-mir-487b	8	1	1	6	0	0	0	0.06	0.08	0.47	0	0	0	GUGGUUAUCCCUGUCCUGUUCG	UACUUGGAGAGUGGUUAUCCCUGUCCUGUUCGUUUUACUCAUGUCGAAUCGUACAGGGUC
ssc-miR-551a	8	ssc-mir-551a	8	4	0	2	1	1	0	0.24	0	0.16	0.1	0.11	0	GCGACCCACUCUUGGUUUCC	UGGUGACCCUGGAAAUCCAGAGCGGGUGAGGCCUGUCUGACUGUUUCUAGGCGACCCACU
ssc-miR-7136-3p	8	ssc-mir-7136	8	0	0	2	2	4	0	0	0	0.16	0.2	0.45	0	UCUCAGUGUUUGAACCAGAAGC	UCUGGUCCAGACACUGUGGAGCUGAAGAGACCAACACUUCUCAGUGUUUGAACCAGAAGC
ssc-miR-150	9	ssc-mir-150-1	9	3	0	2	0	4	0	0.18	0	0.16	0	0.45	0	UCUCCCAACCCUUGUACCAGUG	CUCGGCCCUAUCUCCCAACCCUUGUACCAGUGCGUGCCUCAGUCCCUGGUACAGGAAUGG
ssc-miR-1839-3p	9	ssc-mir-1839	9	2	5	1	0	0	1	0.12	0.39	0.08	0	0	0.11	AGACCUACUUUUCUACCAACA	CCUAAAUGAAAAGGUAGAUAGAACAGGUCUUGUUUGCAAGAUGAAUUCAAGACCUACUUU
ssc-miR-7143-3p	10	ssc-mir-7143	10	0	2	4	3	1	0	0	0.16	0.32	0.3	0.11	0	UCUGCACUUGAAGCUGAGACUGA	AAGCUCAGCUCUGAAGUGCAGAGGCUGUUUGCACUUCCUCUGCACUUGAAGCUGAGACUG
ssc-miR-20a-3p	12	ssc-mir-20a	12	1	5	4	0	2	0	0.06	0.39	0.32	0	0.23	0	ACUGCAUUAUGAGCACUUAAAGU	GUAGCACUAAAGUGCUUAUAGUGCAGGUAGUGUUUAGUUAUCUACUGCAUUAUGAGCACU
ssc-miR-9820-5p	12	ssc-mir-9820	12	2	1	5	4	0	0	0.12	0.08	0.39	0.39	0	0	GAGGAGGAGGGAAGAAAGGCU	ACCCUGCAGUGAGGAGGAGGGAAGAAAGGCUGCUGCUGUUCUUCUCGCAGUCUUCCAGCC
ssc-miR-187	13	ssc-mir-187	13	5	3	5	0	0	0	0.3	0.23	0.39	0	0	0	UCGUGUCUUGUGUUGCAGCCGG	UGAGACCUCGGGCUACAACACGGGACUCGGGCGCUGCUCUGACCCCUCGUGUCUUGUGUU
ssc-miR-18b	13	ssc-mir-18b	13	3	4	3	0	3	0	0.18	0.31	0.24	0	0.34	0	UAAGGUGCAUCUAGUGCAGUUAG	UCUCUUGUGUUAAGGUGCAUCUAGUGCAGUUAGUGAAGCAGCUUAGAAUCUACUGCCCUA
ssc-miR-202-5p	13	ssc-mir-202	13	1	7	2	2	1	0	0.06	0.54	0.16	0.2	0.11	0	UUCCUAUGCAUAUACUUCUUU	CGCCGUUCCGCCUUCCUAUGCAUAUACUUCUUUGAGGGUCUGGCCUGAAGAGGUGUAGGC
ssc-miR-202-3p	15	ssc-mir-202	15	2	5	7	1	0	0	0.12	0.39	0.55	0.1	0	0	AGAGGUGUAGGCAUGGGAA	CGCCGUUCCGCCUUCCUAUGCAUAUACUUCUUUGAGGGUCUGGCCUGAAGAGGUGUAGGC
ssc-miR-301	15	ssc-mir-301	15	4	5	2	1	2	1	0.24	0.39	0.16	0.1	0.23	0.11	CAGUCCAAUAGUAUUGUCAAAGC	GCUAACAAAUGCUCUGACUUUAUUGCACUACUGUACUUUACAGCUACCAGUCCAAUAGUA
ssc-miR-33b-3p	15	ssc-mir-33b	15	4	2	2	3	0	4	0.24	0.16	0.16	0.3	0	0.44	CAGUGCCUCGGCAGUGCAGCCC	CGGGCGGCCCCGCGGUGCAUUGCUGUUGCAUUGCACGUGUGAGGCGGGUGCAGUGCCUCG
ssc-miR-142-3p	16	ssc-mir-142	16	2	9	5	0	0	0	0.12	0.7	0.39	0	0	0	UGUAGUGUUUCCUACUUUAUGG	GUGCAGUCACCCAUAAAGUAGAAAGCACUACUAACAGCACUGGAGGGUGUAGUGUUUCCU
ssc-miR-133b	17	ssc-mir-133b	17	10	0	3	1	3	0	0.6	0	0.24	0.1	0.34	0	UUUGGUCCCCUUCAACCAGCUAU	CCUGCUCUGGCUGGUCAAACGGAACCAAGUCCGUCUUCCUGAGAGGUUUGGUCCCCUUCA
ssc-miR-206	18	ssc-mir-206	18	4	4	2	6	0	2	0.24	0.31	0.16	0.59	0	0.22	UGGAAUGUAAGGAAGUGUGUGA	UUCCCGAGGCCACAUGCUUCUUUAUAUCCCCAUACGGAUUACUUGACUAUGGAAUGUAAG
ssc-miR-542-5p	18	ssc-mir-542	18	6	1	5	2	4	0	0.36	0.08	0.39	0.2	0.45	0	UCGGGGAUCAUCAUGUCACGA	CCUCAGACGUCUCGGGGAUCAUCAUGUCACGAGAGACCACUGUGCACUUGUGACAGAUUG
ssc-miR-142-5p	19	ssc-mir-142	19	3	1	0	0	8	7	0.18	0.08	0	0	0.9	0.76	CAUAAAGUAGAAAGCACUACU	GUGCAGUCACCCAUAAAGUAGAAAGCACUACUAACAGCACUGGAGGGUGUAGUGUUUCCU
ssc-miR-375	19	ssc-mir-375	19	9	5	2	0	0	3	0.54	0.39	0.16	0	0	0.33	UUUGUUCGUUCGGCUCGCGUGA	CCCCCGCCCCGCGACGAGCCCCUCGCACAAACCGGACCUGAGCGUUUUGUUCGUUCGGCU
ssc-miR-4332	19	ssc-mir-4332	19	1	11	5	2	0	0	0.06	0.85	0.39	0.2	0	0	CACGGCCGCCGCCGGGCGCC	CGGCGGGGGGUGUCGCGGGGGUGGGCGGGCUGGGGCCGGGGGUGGGGCCGGCGGGGGCAC
ssc-miR-10386	21	ssc-mir-10386	21	3	0	4	4	4	6	0.18	0	0.32	0.39	0.45	0.65	GUCGUCCUCUCCCUCCCUCCU	CCCGUCGUCCUCUCCCUCCCUCCUCUCCGGAGGGGGAGGGGGGGGCCCGCGGCGGG
ssc-miR-1277	22	ssc-mir-1277	22	3	5	11	0	1	2	0.18	0.39	0.87	0	0.11	0.22	UACGUAGAUAUAUAUGUAUUUU	UAGCCUCCCAAAUAUAUAUAUAUAUGUACGUAUGUGUAUAUGAAUGUAUACGUAGAUAUA
ssc-miR-190b	22	ssc-mir-190b	22	5	2	5	7	1	2	0.3	0.16	0.39	0.69	0.11	0.22	UGAUAUGUUUGAUAUUGGGUUG	UGCUUCUGUGUGAUAUGUUUGAUAUUGGGUUGUUUAAUUAGGAACCAACUAAAUGUCAAA
ssc-miR-204	22	ssc-mir-204	22	11	3	8	0	0	0	0.66	0.23	0.63	0	0	0	UUCCCUUUGUCAUCCUAUGCCU	GGCUACAGUCCUUCUCAUGUGACUCGUGGACUUCCCUUUGUCAUCCUAUGCCUGAGAAUA
ssc-miR-10390	24	ssc-mir-10390	24	1	1	7	0	9	6	0.06	0.08	0.55	0	1.02	0.65	AUACUACUGACAGACCGCAACCU	ACUAUACUACUGACAGACCGCAACCUGAACACAACCUUUUUUGAUCCAGCAGGUGGUACA
ssc-miR-9810-3p	26	ssc-mir-9810	26	6	8	5	0	6	1	0.36	0.62	0.39	0	0.68	0.11	CGAGCACGCGGCCACUCUCCC	GAGGAGGGCGAGAGGCGUUGAGGCAGGGGAGAGUGACGAGGUGCCCUUCAUUGUCAGCCA
ssc-miR-105-1	30	ssc-mir-105-1	30	2	21	7	0	0	0	0.12	1.63	0.55	0	0	0	UCAAAUGCUCAGACUCCUGU	UGUGCAUCGUAGUCAAAUGCUCAGACUCCUGUGGUGGCUGCUCAUGCACCACGGAUGUUU
ssc-miR-136-5p	30	ssc-mir-136	30	1	16	12	0	0	1	0.06	1.24	0.95	0	0	0.11	ACUCCAUUUGUUUUGAUGAUGGA	UGAGCCCUCGGAGGACUCCAUUUGUUUUGAUGAUGGAUUCUUACGCUCCAUCAUCGUCUC
ssc-miR-133a-5p	31	ssc-mir-133a-1	31	11	9	2	6	1	2	0.66	0.7	0.16	0.59	0.11	0.22	AGCUGGUAAAAUGGAACCAAAU	CGGGACCCAAAUGCUUUGCUAAAGCUGGUAAAAUGGAACCAAAUCAACUGUUGAAUGGAU
ssc-miR-324	31	ssc-mir-324	31	9	3	11	1	0	7	0.54	0.23	0.87	0.1	0	0.76	CGCAUCCCCUAGGGCAUUGGUGU	CUAUGCCUCCCCGCAUCCCCUAGGGCAUUGGUGUGAAGCUGGAGACCCACUGCCCCAGGU
ssc-miR-582-5p	31	ssc-mir-582	31	6	1	13	6	0	5	0.36	0.08	1.03	0.59	0	0.54	UACAGUUGUUCAACCAGUUACU	CUCUUUGGUUACAGUUGUUCAACCAGUUACUAAUCUAACUAACUGUAACCGGUUGAACAA
ssc-miR-4338	32	ssc-mir-4338	32	4	2	2	11	8	5	0.24	0.16	0.16	1.09	0.9	0.54	AUGUUCAGUCUCAGUGGGAACC	AUCUCUCGAGAUGUUCAGUCUCAGUGGGAACCGUGUGUAAGUCUUGUUCCCAUUGAGACU
ssc-miR-10382	33	ssc-mir-10382	33	6	2	2	2	5	16	0.36	0.16	0.16	0.2	0.56	1.74	UCUGACCCUGGCCCCUGACCCU	AGGUGAGUAGGACGGAGGUCAGGGCAAGGGGUAGAGGCUGAACCUCUGACCCUGGCCCCU
ssc-miR-7139-3p	33	ssc-mir-7139	33	8	6	8	7	1	3	0.48	0.47	0.63	0.69	0.11	0.33	UAGGGCACAGGAUGGGAUGAGG	CCAUUCCUUCGUCUGUGCACUAGAAAAAUAACAGUACCUAGGGCACAGGAUGGGAUGAGG
ssc-miR-652	34	ssc-mir-652	34	16	14	2	1	0	1	0.95	1.09	0.16	0.1	0	0.11	ACAACCCUAGGAGAGGGUGCCAUUCA	UAUGCACUGCACAACCCUAGGAGAGGGUGCCAUUCACAUAGACUAUAAUUGAAUGGCGCC
ssc-miR-885-5p	37	ssc-mir-885	37	15	6	5	7	3	1	0.89	0.47	0.39	0.69	0.34	0.11	UCCAUUACACUACCCUGCCUCU	CACUCGGCCCGCGCUCUCUCCAUUACACUACCCUGCCUCUUCUCCACGAGAGGCAGCGGG
ssc-miR-885-3p	38	ssc-mir-885	38	13	3	12	8	1	1	0.77	0.23	0.95	0.79	0.11	0.11	AGGCAGCGGGGUGUAGUGGAU	CACUCGGCCCGCGCUCUCUCCAUUACACUACCCUGCCUCUUCUCCACGAGAGGCAGCGGG
ssc-miR-7135-5p	39	ssc-mir-7135	39	7	9	4	7	2	10	0.42	0.7	0.32	0.69	0.23	1.09	UCUCUGAGACACUGACUGUGG	UCUCUGAGACACUGACUGUGGGGGUAUGUGUGUGUCCAUCUGUCUGUGUCUCUGAGCAG
ssc-miR-184	40	ssc-mir-184	40	14	5	7	7	3	4	0.83	0.39	0.55	0.69	0.34	0.44	UGGACGGAGAACUGAUAAGGGU	CCAGUCACAUCCCCUUAUCACUUUUCCAGCCAGCUUUGUGACUCUAAAUGUUGGACGGAG
ssc-miR-326	40	ssc-mir-326	40	12	10	7	5	4	2	0.72	0.78	0.55	0.49	0.45	0.22	CCUCUGGGCCCUUCCUCCAG	UCUGUCUGUUGGGCUGGAGGCAGGGCCUUUGUGCAGGCGGGUUGUGCUCAGAUCGCCUCU
ssc-miR-181c	43	ssc-mir-181c	43	10	10	11	2	9	1	0.6	0.78	0.87	0.2	1.02	0.11	AACAUUCAACCUGUCGGUGAGU	CAAGGGUUUGGGGGAACAUUCAACCUGUCGGUGAGUUUGGGCAGCUCAGGCAAACCAUCG
ssc-miR-376a-3p	43	ssc-mir-376a	43	17	9	8	1	7	1	1.01	0.7	0.63	0.1	0.79	0.11	AUCAUAGAGGAAAAUCCACGU	GGUAUUUAAAAGGUAGAUUCUCCUUCUAUGAGUACAUUAUUUAUUAUUAAUCAUAGAGGA
ssc-miR-676-5p	45	ssc-mir-676-1	45	8	10	7	3	9	8	0.48	0.78	0.55	0.3	1.02	0.87	CUCUUCAAUCUCAGGACUCGCA	AACGCGUGACUCUUCAAUCUCAGGACUCGCAUAAUUAGCAGAAUGCCGUCCUAAGGUUGU
ssc-miR-10391	48	ssc-mir-10391	48	4	13	8	9	9	5	0.24	1.01	0.63	0.89	1.02	0.54	AAGGAAGGAGACUAACUCCGCC	GGGUCAGUUUUCAUUUCAUUGGUCUUGUAAACCAGAAAAGGAGGAGGACACGUCCUCCCU
ssc-miR-190a	53	ssc-mir-190a	53	15	7	6	11	6	8	0.89	0.54	0.47	1.09	0.68	0.87	UGAUAUGUUUGAUAUAUUAGG	GGCCUCUGUGUGAUAUGUUUGAUAUAUUAGGUUGUUAUUUAAUCCAACUAUAUAUCAAAC
ssc-miR-194b-5p	60	ssc-mir-194b	60	15	9	16	3	10	7	0.89	0.7	1.26	0.3	1.13	0.76	UGUAACAGCGACUCCAUGUGGA	CGCCAUCAGCUGUAACAGCGACUCCAUGUGGACUGUGCCCCAAUUUCCAGUGGAGAUGCU
ssc-miR-193a-3p	64	ssc-mir-193a	64	5	19	23	2	5	10	0.3	1.48	1.81	0.2	0.56	1.09	AACUGGCCUACAAAGUCCCAGU	GCGGGAGCUGAGGGCUGGGUCUUUGCGGGCGAGAUGAGGGUGUUGGUUCAACUGGCCUAC
ssc-miR-345-5p	67	ssc-mir-345-1	67	10	30	16	3	5	3	0.6	2.33	1.26	0.3	0.56	0.33	GCUGACUCCUAGUCCAGUGC	AACCCAGGUCUGCUGACUCCUAGUCCAGUGCUUGUGAUGGCUGGUGGGCCCUGAACUAGG
ssc-miR-126-5p	77	ssc-mir-126	77	17	16	18	11	8	7	1.01	1.24	1.42	1.09	0.9	0.76	CAUUAUUACUUUUGGUACGCG	CGACGGGACAUUAUUACUUUUGGUACGCGCUGUGACACUUCAAACUCGUACCGUGAGUAA
ssc-miR-335	85	ssc-mir-335	85	28	16	16	15	5	5	1.67	1.24	1.26	1.48	0.56	0.54	UCAAGAGCAAUAACGAAAAAUG	CUUUUGGGCGGGGGUCAAGAGCAAUAACGAAAAAUGUUUGUCAUAAACCGUUUUUCAUUA
ssc-miR-582-3p	85	ssc-mir-582	85	21	18	23	10	3	10	1.25	1.4	1.81	0.99	0.34	1.09	UAACCGGUUGAACAACUGAACC	CUCUUUGGUUACAGUUGUUCAACCAGUUACUAAUCUAACUAACUGUAACCGGUUGAACAA
ssc-miR-99a-3p	85	ssc-mir-99a	85	16	33	18	1	8	9	0.95	2.56	1.42	0.1	0.9	0.98	CAAGCUCGCUUCUAUGGGUCU	CCAUUGGCAUAAACCCGUAGAUCCGAUCUUGUGGUGAAGUGGACCGCACAAGCUCGCUUC
ssc-miR-17-3p	86	ssc-mir-17	86	11	23	20	13	8	11	0.66	1.79	1.58	1.28	0.9	1.2	ACUGCAGUGAAGGCACUUGUAG	GAAUAAUGUCAAAGUGCUUACAGUGCAGGUAGUGAUAAUGUGCAUCUACUGCAGUGAAGG
ssc-miR-450b-3p	87	ssc-mir-450b	87	21	20	29	5	7	5	1.25	1.55	2.29	0.49	0.79	0.54	UUGGGAACAUUUUGCAUCCAU	AAAAUUAUUUUUGCAAUAUGUUCCUGAAUAUGUAAUAUAAGUAUAUUGGGAACAUUUUGC
ssc-miR-1388	102	ssc-mir-1388	102	42	16	12	8	14	10	2.5	1.24	0.95	0.79	1.58	1.09	AGGACUGUCAAACCUGAGAAUG	GUGCCUCCAGGACUGUCAAACCUGAGAAUGGUGAGCGUCCAGGGACAAUCUCAGGUGUGU
ssc-miR-26b-3p	102	ssc-mir-26b	102	17	25	19	13	21	7	1.01	1.94	1.5	1.28	2.37	0.76	CCUGUUCUCCAUUACUUGGCU	CCCAGUUCAAGUAAUUCAGGAUAGGUUGUGUGCUGUCCAGCCUGUUCUCCAUUACUUGGC
ssc-miR-29a-5p	102	ssc-mir-29a	102	22	18	40	5	4	13	1.31	1.4	3.16	0.49	0.45	1.42	ACUGAUUUCUUUUGGUGUUCAG	CCCCUUAGAGGAUGACUGAUUUCUUUUGGUGUUCAGAGUCAAUAUAAUUUUCUAGCACCA
ssc-miR-194a-3p	106	ssc-mir-194a	106	16	33	34	1	6	16	0.95	2.56	2.68	0.1	0.68	1.74	CCAGUGGGGCUGCUGUUAUCU	UGCCACCCCCUGUAACAGCAACUCCAUGUGGAAGUGCCCACUAGUUCCAGUGGGGCUGCU
ssc-miR-139-3p	110	ssc-mir-139	110	20	14	15	25	18	18	1.19	1.09	1.18	2.47	2.03	1.96	UGGAGACGCGGCCCUGUUGGAGU	GUGUAUUCUACAGUGCACGUGUCUCCAGUGUGGCUCGGAGGCUGGAGACGCGGCCCUGUU
ssc-let-7i-3p	111	ssc-let-7i	111	23	24	31	4	19	10	1.37	1.87	2.45	0.39	2.15	1.09	CUGCGCAAGCUACUGCCUUGCU	CUGGCUGAGGUAGUAGUUUGUGCUGUUGGUCGGGUUGUGACAUUGCCCGCUGUGGAGAUA
ssc-miR-9860-5p	118	ssc-mir-9860	118	20	27	27	19	14	11	1.19	2.1	2.13	1.87	1.58	1.2	UUGCCCGAGAGCUUGGACCGC	GGCCUUUCUCUUGCCCGAGAGCUUGGACCGCGCGUUGCAGUGGGGUGACGCGAGGUUCAG
ssc-miR-452	119	ssc-mir-452	119	37	47	23	8	1	3	2.21	3.65	1.81	0.79	0.11	0.33	AACUGUUUGCAGAGGAAACUGA	AAGCACUUACAACUGUUUGCAGAGGAAACUGAGACUUUGUAACUACAUCUCAGUCUCAAC
ssc-miR-29c	120	ssc-mir-29c	120	17	34	41	12	3	13	1.01	2.64	3.23	1.18	0.34	1.42	UAGCACCAUUUGAAAUCGGUUA	AUCUCUUACACAGGCUGACCGAUUUCUCCUGGUGUUCAGAGUCUGUUUUUGUCUAGCACC
ssc-miR-935	120	ssc-mir-935	120	19	29	22	19	18	13	1.13	2.25	1.74	1.87	2.03	1.42	CCAGUUACCGCUUCCGCUACCGC	GGCGCAGGCGGCAGUGGCGGGAGCGGCCCCUCGGCCAUCCUCCGUCUGCCCAGUUACCGC
ssc-miR-155-3p	122	ssc-mir-155	122	6	9	20	37	18	32	0.36	0.7	1.58	3.65	2.03	3.49	UCCUACAUGUUAGCAUUAACA	CUAUAUGCUGUUAAUGCUAAUUGUGAUAGGGGUUUUUACCUCCGUCUGACUCCUACAUGU
ssc-miR-339-3p	123	ssc-mir-339-1	123	35	34	43	4	3	4	2.09	2.64	3.39	0.39	0.34	0.44	AGCUCCUCGAGGCCAGAGCCC	GCAGCCGCCGUCCCUGUCCUCCAGGAGCUCACUUACCUUGGGCCGUGAGCUCCUCGAGGC
ssc-miR-194a-5p	125	ssc-mir-194a	125	22	33	37	15	10	8	1.31	2.56	2.92	1.48	1.13	0.87	UGUAACAGCAACUCCAUGUGG	UGCCACCCCCUGUAACAGCAACUCCAUGUGGAAGUGCCCACUAGUUCCAGUGGGGCUGCU
ssc-miR-7136-5p	126	ssc-mir-7136	126	27	19	23	15	21	21	1.61	1.48	1.81	1.48	2.37	2.29	UCUGGUCCAGACACUGUGGAGC	UCUGGUCCAGACACUGUGGAGCUGAAGAGACCAACACUUCUCAGUGUUUGAACCAGAAGC
ssc-miR-1468	137	ssc-mir-1468	137	20	28	32	18	20	19	1.19	2.18	2.52	1.78	2.26	2.07	CUCCGUUUGCCUGUUUUGCUGA	UGGGUGGUUUCUCCGUUUGCCUGUUUUGCUGACGUUCAUUUGACUCAUUCUCAGCAAAAU
ssc-miR-491	142	ssc-mir-491	142	31	47	31	10	9	14	1.85	3.65	2.45	0.99	1.02	1.53	AGUGGGGAACCCUUCCAUGAGG	UUAGCUGGGUAGUGGGGAACCCUUCCAUGAGGAGUAGAACACUCCUUAUGCAAGAUUCCC
ssc-miR-7140-3p	144	ssc-mir-7140	144	23	49	37	12	15	8	1.37	3.81	2.92	1.18	1.69	0.87	AUGAUGCCCCUUAGAGUUGAGC	CAACUCAAGGGGGCAUCAUUCACUUCAUAGUCUCUGUGAAUGAUGCCCCUUAGAGUUGAG
ssc-miR-6516	145	ssc-mir-6516	145	39	21	26	22	27	10	2.32	1.63	2.05	2.17	3.05	1.09	AUCAUGUAUGAUACUGCAAACA	GUUUUGAAUUUGCAGUAACAGGUGUGAACAUUCUAGCAGCAGUUUGAUGAUCAUGUAUGA
ssc-miR-10383	210	ssc-mir-10383	210	17	45	58	39	29	22	1.01	3.5	4.58	3.85	3.28	2.4	UGGUGCCUGACGUCUUGGCAGU	GCCCACAGCCAGGGCUGCAGGCACUGACAUUCACCCAUGGUAUUGUGGUGCCUGACGUCU
ssc-miR-874	224	ssc-mir-874	224	66	61	49	13	20	15	3.93	4.74	3.87	1.28	2.26	1.63	CUGCCCUGGCCCGAGGGACCGAC	UGGUGUUAGCCCUGCGGCCCCACGCACCAGGGUAAGAGAGACUCUCGCUUCCUGCCCUGG
ssc-miR-2483	228	ssc-mir-2483	228	39	57	51	33	29	19	2.32	4.43	4.02	3.26	3.28	2.07	AAACAUCUGGUUGGUUGAGAGA	UGAAAAGUUCCGUCAACCAUCCAGCUGUUUGGGGUGAUGCAAACAAACAUCUGGUUGGUU
ssc-miR-369	232	ssc-mir-369	232	65	86	53	7	8	13	3.87	6.68	4.18	0.69	0.9	1.42	AAUAAUACAUGGUUGAUCUUU	UUGAAGGGAGAUCGACCGUGUUAUAUUCGCUUUAUGGUACUUGAAGGGAGAUCGACCGUG
ssc-miR-136-3p	237	ssc-mir-136	237	81	35	43	29	24	25	4.83	2.72	3.39	2.86	2.71	2.72	CAUCAUCGUCUCAAAUGAGUCU	UGAGCCCUCGGAGGACUCCAUUUGUUUUGAUGAUGGAUUCUUACGCUCCAUCAUCGUCUC
ssc-miR-7135-3p	251	ssc-mir-7135	251	40	25	53	48	43	42	2.38	1.94	4.18	4.74	4.86	4.58	AUCUGUCUGUGUCUCUGAGCAG	UCUCUGAGACACUGACUGUGGGGGUAUGUGUGUGUCCAUCUGUCUGUGUCUCUGAGCAG
ssc-miR-15a	253	ssc-mir-15a	253	64	70	87	12	15	5	3.82	5.44	6.86	1.18	1.69	0.54	UAGCAGCACAUAAUGGUUUGU	UUGGAGUAAAGUAGCAGCACAUAAUGGUUUGUGGAUUUUGAAAAGGUGCAGGCCAUAUUG
ssc-miR-135	257	ssc-mir-135-1	257	50	64	85	20	18	20	2.98	4.97	6.71	1.97	2.03	2.18	UAUGGCUUUUUAUUCCUAUGUGA	AGGCCUCGCUGUUCUCUAUGGCUUUUUAUUCCUAUGUGAUUCUACUGCUCAUUCAUAUAG
ssc-miR-450c-3p	259	ssc-mir-450c	259	42	107	71	15	8	16	2.5	8.32	5.6	1.48	0.9	1.74	AUUGGGAACAUUUUGCAUUCGU	GGCACUAAACUAUUUUUGCGAUGUGUUCCUAAUACGUAAUCUAAGUGUAUUGGGAACAUU
ssc-miR-628-3p	265	ssc-mir-628	265	34	38	86	30	33	44	2.03	2.95	6.78	2.96	3.73	4.79	UCUAGUAAGAGUGGCAGUCGAAG	GUGUCACUUCCUCAUGCUGACAUAUUUACUAGAGGGUAAAGUUAACAACCUUCUAGUAAG
ssc-miR-299	268	ssc-mir-299	268	44	31	20	62	68	43	2.62	2.41	1.58	6.12	7.68	4.69	AUGGUUUACCGUCCCACAUAC	CGGUACUUGAAGAAAUGGUUUACCGUCCCACAUACAUUUUGCAUAUGUAUGUGGGACGGU
ssc-miR-96-5p	271	ssc-mir-96	271	42	78	87	27	22	15	2.5	6.06	6.86	2.66	2.49	1.63	UUUGGCACUAGCACAUUUUUGCU	CUGGGCCGAUUUUGGCACUAGCACAUUUUUGCUUGUGUCUCUCCGCUCUGAGCAAUUAUG
ssc-miR-215	272	ssc-mir-215	272	70	58	58	39	19	28	4.17	4.51	4.58	3.85	2.15	3.05	AUGACCUAUGAAUUGACAGAC	AGAGAUGGUGUACAGGAAAAUGACCUAUGAAUUGACAGACAAUGUGGCUAAAUCUGUCUG
ssc-miR-342	290	ssc-mir-342	290	83	76	73	27	12	19	4.95	5.91	5.76	2.66	1.36	2.07	UCUCACACAGAAAUCGCACCCGUCA	AAGGUGAGGGUGCUAUCUGUGACUGAGGGACAUGGCGCAUAGAACUGUCUCACACAGAAA
ssc-miR-628-5p	306	ssc-mir-628	306	51	95	83	37	16	24	3.04	7.38	6.55	3.65	1.81	2.62	AUGCUGACAUAUUUACUAGAGG	GUGUCACUUCCUCAUGCUGACAUAUUUACUAGAGGGUAAAGUUAACAACCUUCUAGUAAG
ssc-miR-497	318	ssc-mir-497	318	45	95	93	22	20	43	2.68	7.38	7.34	2.17	2.26	4.69	CAGCAGCACACUGUGGUUUGU	CCCGCCCCAGCAGCACACUGUGGUUUGUACGGCACUGUGGCCACGUCCAAACCACACUGU
ssc-miR-24-2-5p	324	ssc-mir-24-2	324	35	75	115	24	29	46	2.09	5.83	9.07	2.37	3.28	5.01	GUGCCUACUGAGCUGAUAUCAGU	GACCCGCCCUCCGGUGCCUACUGAGCUGAUAUCAGUUCUCAUUUUACACACUGGCUCAGU
ssc-miR-7144-5p	328	ssc-mir-7144	328	96	76	69	30	27	30	5.72	5.91	5.44	2.96	3.05	3.27	ACUUUCCCGGGAUUUGGAGCGC	ACUUUCCCGGGAUUUGGAGCGCUUCCGCACGCGCUCCUUGUCCCGAGACCGCGA
ssc-miR-769-3p	342	ssc-mir-769	342	55	155	85	11	26	10	3.28	12.05	6.71	1.09	2.94	1.09	CUGGGAUCUCUGGGGUCUUGGUU	UGCGCUCUGACCUGAGACCUCUGGGUUCUGAGCUGUGAUGUUGCUUCCAAGCUGGGAUCU
ssc-miR-504	345	ssc-mir-504	345	111	51	62	41	45	35	6.62	3.96	4.89	4.04	5.08	3.81	AGACCCUGGUCUGCACUCUAUCU	GCUGUUGGGAGACCCUGGUCUGCACUCUAUCUGUAUGCUUACUGAAGGGAGCGCAGGGCA
ssc-miR-10388	347	ssc-mir-10388	347	72	130	87	16	26	16	4.29	10.1	6.86	1.58	2.94	1.74	CACAACUCUGGGAAGUACCAUUU	CACAACUCUGGGAAGUACCAUUUAGAUAUGCUAUAUUGUGAAUGGUGCUCCAGGGUUGU
ssc-miR-95	357	ssc-mir-95	357	94	84	88	46	28	17	5.6	6.53	6.94	4.54	3.16	1.85	UUCAACGGGUAUUUAUUGAGCA	AACACAGUGGGCGCUCAAUAAAUGUUUGUUGAAUUGAGAUGCGUUAAAUUCAACGGGUAU
ssc-miR-196b-5p	380	ssc-mir-196b-1	380	73	137	131	8	14	17	4.35	10.65	10.33	0.79	1.58	1.85	UAGGUAGUUUCCUGUUGUUGGG	CUGGUCGGUGAUUUAGGUAGUUUCCUGUUGUUGGGAUCCACCUUUCUCUCGACAGCACGA
ssc-miR-664-5p	408	ssc-mir-664	408	95	67	54	75	62	55	5.66	5.21	4.26	7.4	7.01	5.99	CAGGCUAGGAGAAGUGAUUGGAU	GAACAUUGAAACAGGCUAGGAGAAGUGAUUGGAUAGAAAAUGGUAUUCUAUUCAUUUAUC
ssc-miR-7-3p	409	ssc-mir-7-2	409	120	134	86	28	14	27	7.15	10.41	6.78	2.76	1.58	2.94	CAACAAAUCACAGUCUGCCAUA	UGGAUGUUGGUCUAGUUCUGUGUGGAAGACUAGUGAUUUUGUUGUUUUUAGAUAACUAAA
ssc-miR-664-3p	415	ssc-mir-664	415	113	85	65	64	25	63	6.74	6.61	5.13	6.31	2.82	6.86	UAUUCAUUUAUCUCCCAGCCUACA	GAACAUUGAAACAGGCUAGGAGAAGUGAUUGGAUAGAAAAUGGUAUUCUAUUCAUUUAUC
ssc-miR-374b-3p	416	ssc-mir-374b	416	113	79	102	36	47	39	6.74	6.14	8.05	3.55	5.31	4.25	CUUAUCAGGUUGUAUUAUCAUU	UCGGAUGGAUAUAAUACAACCUGCUAAGUGUCCUAGCACUUAUCAGGUUGUAUUAUCAUU
ssc-miR-1296-5p	450	ssc-mir-1296	450	81	144	126	32	25	42	4.83	11.19	9.94	3.16	2.82	4.58	UUAGGGCCCUGGCUCCAUCUCC	CCUAACUGGGUUAGGGCCCUGGCUCCAUCUCCUUUAGGAAAACCUUCUGUGGGGAGUGGG
ssc-miR-532-3p	452	ssc-mir-532	452	111	134	92	33	22	60	6.62	10.41	7.26	3.26	2.49	6.54	CCUCCCACACCCAAGGCUUGCA	UUGCUUUCUCUCUUACAUGCCUUGAGUGUAGGACCGUUGGCAUCUGAAUACCCUCCCACA
ssc-miR-130b-3p	454	ssc-mir-130b	454	87	113	174	29	24	27	5.19	8.78	13.73	2.86	2.71	2.94	CAGUGCAAUGAUGAAAGGGCAU	GCCUGCCUGACACUCUUUCCCUGUUGCACUACUGUGGGCCACUGGGAAGCAGUGCAAUGA
ssc-miR-130a	465	ssc-mir-130a	465	69	145	150	31	35	35	4.11	11.27	11.83	3.06	3.95	3.81	CAGUGCAAUGUUAAAAGGGCAU	CGGGCCGGAGCUCUUUUCACAUUGUGCUACUGUCUGCACCUAUCACUAGCAGUGCAAUGU
ssc-miR-7139-5p	483	ssc-mir-7139	483	86	39	84	85	108	81	5.13	3.03	6.63	8.39	12.2	8.83	CCAUUCCUUCGUCUGUGCACUAG	CCAUUCCUUCGUCUGUGCACUAGAAAAAUAACAGUACCUAGGGCACAGGAUGGGAUGAGG
ssc-miR-500-5p	516	ssc-mir-500	516	137	134	120	52	45	28	8.17	10.41	9.47	5.13	5.08	3.05	UAAUCCUUGCUACCUGGGUGAGA	CCCCUCUCUAAUCCUUGCUACCUGGGUGAGAGUGCUGUGUGAAUGCAAUGCACCUGGGCA
ssc-miR-195	517	ssc-mir-195	517	73	161	180	37	26	40	4.35	12.51	14.2	3.65	2.94	4.36	UAGCAGCACAGAAAUAUUGGC	CAGCCCCCCUGGCUCUAGCAGCACAGAAAUAUUGGCACCGGGCGGAGAGUCUGCCAGUAU
ssc-miR-296-5p	518	ssc-mir-296	518	137	125	121	28	45	62	8.17	9.71	9.55	2.76	5.08	6.76	GAGGGCCCCCCCCAAUCCUGU	GACCCUUCCGGAGGGCCCCCCCCAAUCCUGUUGUGCUGGAUUCAGAGGGUUGGGCGGAGG
ssc-miR-1285	542	ssc-mir-1285	542	90	139	194	38	55	26	5.37	10.8	15.31	3.75	6.21	2.83	CUGGGCAACAUAGCGAGACCCCGU	GCUGAUCAGUAGUGGGAUCGCGCCUGUGAAUAGCCACUGUACUCCAGCCUGGGCAACAUA
ssc-miR-30b-3p	560	ssc-mir-30b	560	104	112	116	93	49	86	6.2	8.7	9.15	9.17	5.54	9.37	CUGGGAGGUGGAUGUUUACUU	UUUCAGUUCGUGUAAACAUCCUACACUCAGCUGUAAUACAUGGAUUGGCUGGGAGGUGGA
ssc-miR-4331-5p	566	ssc-mir-4331-1	566	126	119	117	72	57	75	7.51	9.25	9.23	7.1	6.44	8.17	UGGCGUAGAUCACAGACACAGC	CCAUGAGCUAUGGCGUAGAUCACAGACACAGCUCAGAUCUGGCAUUGCUGUGGCUGUGGU
ssc-miR-196a	572	ssc-mir-196a-1	572	126	242	162	12	14	16	7.51	18.81	12.78	1.18	1.58	1.74	UAGGUAGUUUCAUGUUGUUGGG	CUGAGUGAAUUAGGUAGUUUCAUGUUGUUGGGCCUGGAUUUCUGAACACAACGACAUUAA
ssc-miR-106a	584	ssc-mir-106a	584	103	160	149	51	49	72	6.14	12.43	11.75	5.03	5.54	7.85	AAAAGUGCUUACAGUGCAGGUAGC	CCUUGGCCGUGUAAAAGUGCUUACAGUGCAGGUAGCUUUUUGAGAUCUACUGCAAUGCAA
ssc-miR-425-3p	625	ssc-mir-425	625	153	144	133	77	54	64	9.12	11.19	10.49	7.6	6.1	6.97	AUCGGGAAUGUCGUGUCCGCCC	AAGUGCUUUGGAAUGACACGAUCACUCCCGUUGAGUGGGCACCCAAGUAGCCAUCGGGAA
ssc-miR-7137-5p	650	ssc-mir-7137	650	102	124	194	75	79	76	6.08	9.64	15.31	7.4	8.93	8.28	CGGGGGAACUCCCAGACCAGC	CGGGGGAACUCCCAGACCAGCUUCCACUCCCUUCAAGAAGCUGGUCUGGGAGUUCCCGGG
ssc-miR-30c-1-3p	655	ssc-mir-30c-1	655	116	158	143	82	94	62	6.92	12.28	11.28	8.09	10.62	6.76	CUGGGAGAGGGUUGUUUACU	CGUAGUGCGUGUAAACAUCCUACACUCUCAGCUGUGAGCUCGAGGUGGCUGGGAGAGGGU
ssc-miR-92b-5p	658	ssc-mir-92b	658	125	98	117	119	92	107	7.45	7.62	9.23	11.74	10.39	11.66	AGGGACGGGACGCGGUGCAGUGUU	GCGGGCGGGAGGGACGGGACGCGGUGCAGUGUUGUUCUUUCCCCUGCCAAUAUUGCACUC
ssc-miR-493-3p	661	ssc-mir-493	661	107	197	185	66	52	54	6.38	15.31	14.59	6.51	5.88	5.88	UGAAGGUCUACUGUGUGCCAGG	CCCCAGGGCCUUGUACAUGGUAGGCUUUCAUUCAUUCGUUUGCACAUGCGGUGAAGGUCU
ssc-miR-34c	676	ssc-mir-34c-1	676	185	165	154	74	26	72	11.03	12.82	12.15	7.3	2.94	7.85	AGGCAGUGUAGUUAGCUGAUUGC	AGUCUAGUUACUAGGCAGUGUAGUUAGCUGAUUGCUGAUAAAACCAAUCACUAACCACAC
ssc-miR-133a-3p	689	ssc-mir-133a-1	689	165	186	163	54	57	64	9.84	14.45	12.86	5.33	6.44	6.97	UUGGUCCCCUUCAACCAGCUG	CGGGACCCAAAUGCUUUGCUAAAGCUGGUAAAAUGGAACCAAAUCAACUGUUGAAUGGAU
ssc-miR-454	696	ssc-mir-454	696	198	186	171	55	49	37	11.8	14.45	13.49	5.43	5.54	4.03	UAGUGCAAUAUUGCUUAUAGGGU	AGUAGUGCAAUAUUGCUUAUAGGGUUUUGGUGUUUGGGAAGAACUAUGGGCAAGUUGCAG
ssc-miR-18a	702	ssc-mir-18a	702	105	181	219	67	66	64	6.26	14.07	17.28	6.61	7.46	6.97	UAAGGUGCAUCUAGUGCAGAUA	GUGCUUUUUGUUCUAAGGUGCAUCUAGUGCAGAUAGUGAAGUAGAUUAGCAUCUACUGCC
ssc-miR-4331-3p	713	ssc-mir-4331-1	713	162	137	133	95	86	100	9.66	10.65	10.49	9.37	9.72	10.9	UGUGGCUGUGGUGUAGGCCAGC	CCAUGAGCUAUGGCGUAGAUCACAGACACAGCUCAGAUCUGGCAUUGCUGUGGCUGUGGU
ssc-miR-660	747	ssc-mir-660	747	184	207	175	72	45	64	10.97	16.09	13.81	7.1	5.08	6.97	UACCCAUUGCAUAUCGGAGUUG	CUCCCAUACCCAUUGCAUAUCGGAGUUGUGAAUUCUCAAAGCACCUCCUAUGUGCAUGGU
ssc-miR-1842	755	ssc-mir-1842	755	171	202	180	84	54	64	10.19	15.7	14.2	8.29	6.1	6.97	UUGGCUCUGCGAGGUCGGCU	GCCUGGGGUUCUGAUGUGGCGGUGGGCAACGUGAGGGCAGCCAGCACCUGUGAGGUUGGU
ssc-miR-2411	773	ssc-mir-2411	773	163	98	141	114	121	136	9.72	7.62	11.12	11.25	13.67	14.82	UGGAGUGACUGUCAGAUGCAGC	AGAGGCAAUGUGGAGUGACUGUCAGAUGCAGCCAUCAGAAUAGGUGAUUUGGCUGAACUG
ssc-miR-148b-5p	779	ssc-mir-148b	779	119	186	249	67	87	71	7.09	14.45	19.64	6.61	9.83	7.74	GAAGUUCUGUUAUACACUCAGGC	AUUUGAGGUGAAGUUCUGUUAUACACUCAGGCUGUGGCUCUCUGAAAGUCAGUGCAUCAC
ssc-miR-330	790	ssc-mir-330	790	118	193	217	84	87	91	7.03	15	17.12	8.29	9.83	9.92	UCUCUGGGCCUGUGUCUUAGGCU	CUGCCUCUCUGGGCCUGUGUCUUAGGCUCUGCAAGAUCAACCGAGCAAAGCACACGGCCU
ssc-miR-7137-3p	803	ssc-mir-7137	803	98	134	169	135	132	135	5.84	10.41	13.33	13.32	14.91	14.71	AGCUGGUCUGGGAGUUCCCGGG	CGGGGGAACUCCCAGACCAGCUUCCACUCCCUUCAAGAAGCUGGUCUGGGAGUUCCCGGG
ssc-miR-708-5p	825	ssc-mir-708	825	104	353	229	46	34	59	6.2	27.43	18.07	4.54	3.84	6.43	AAGGAGCUUACAAUCUAGCUGGG	CCCUCAAGGAGCUUACAAUCUAGCUGGGGGUGAAUGACUUGCACAUGAACGCAACUAGAC
ssc-miR-671-5p	833	ssc-mir-671	833	140	310	293	27	28	35	8.35	24.09	23.12	2.66	3.16	3.81	AGGAAGCCCUGGAGGGGCUGGAGG	CAGGAAGAGGAGGAAGCCCUGGAGGGGCUGGAGGUGAUGGAUGUUUUCCUCCGGUUCUCA
ssc-miR-432-5p	856	ssc-mir-432	856	169	172	149	141	113	112	10.07	13.37	11.75	13.91	12.77	12.2	UCUUGGAGUAGGUCAUUGGGU	UCCAGGUCUUGGAGUAGGUCAUUGGGUGGAUCCUUUAUUUCCCUAUGUGGGCCACUGGAU
ssc-miR-10a-3p	857	ssc-mir-10a	857	204	222	218	94	56	63	12.16	17.25	17.2	9.27	6.33	6.86	CAAAUUCGUAUCUAGGGGAAU	UCUGUAUAUACCCUGUAGAUCCGAAUUUGUGUAAGGAAUUUUGUGGUCACAAAUUCGUAU
ssc-miR-19a	884	ssc-mir-19a	884	173	168	266	80	84	113	10.31	13.06	20.99	7.89	9.49	12.31	UGUGCAAAUCUAUGCAAAACUGA	GCAGUCCUCUGUUAGUUUUGCAUAGUUGCACUACAAGAAGAAUGUAGUUGUGCAAAUCUA
ssc-miR-708-3p	892	ssc-mir-708	892	170	196	173	111	95	147	10.13	15.23	13.65	10.95	10.73	16.02	CAACUAGACUGUGAGCUUCUAGA	CCCUCAAGGAGCUUACAAUCUAGCUGGGGGUGAAUGACUUGCACAUGAACGCAACUAGAC
ssc-miR-30c-3p	918	ssc-mir-30c-2	918	256	146	103	165	125	123	15.26	11.35	8.13	16.28	14.12	13.4	CUGGGAGAAGGCUGUUUACUCU	GACAGAUACUGUAAACAUCCUACACUCUCAGCUGUGGAAAGUAAGAAAGCUGGGAGAAGG
ssc-miR-758	941	ssc-mir-758	941	210	230	230	97	94	80	12.52	17.87	18.15	9.57	10.62	8.72	UUUGUGACCUGGUCCACUAAC	GGUACAUGAGGUGGUUGACCAGAGAGCACACGCUUUAUUGUGCCGUUUGUGACCUGGUCC
ssc-miR-1306-3p	942	ssc-mir-1306	942	169	200	162	146	131	134	10.07	15.54	12.78	14.4	14.8	14.6	ACGUUGGCUCUGGUGGUGAUG	GUCUCCACCACCUCCCCUGCAAACGUCCAGUGAUGCAGAGGUAAUGGACGUUGGCUCUGG
ssc-miR-139-5p	1015	ssc-mir-139	1015	189	317	283	94	55	77	11.27	24.64	22.33	9.27	6.21	8.39	UCUACAGUGCACGUGUCUCCAG	GUGUAUUCUACAGUGCACGUGUCUCCAGUGUGGCUCGGAGGCUGGAGACGCGGCCCUGUU
ssc-miR-331-3p	1018	ssc-mir-331	1018	216	272	233	96	95	106	12.88	21.14	18.38	9.47	10.73	11.55	GCCCCUGGGCCUAUCCUAGAA	UUGUUUGGGUUUGUUCUAGGUAUGGUCCCAGGGAUCCCAGAUCAAACCAGGCCCCUGGGC
ssc-miR-362	1062	ssc-mir-362	1062	220	281	258	102	75	126	13.11	21.84	20.35	10.06	8.47	13.73	AAUCCUUGGAACCUAGGUGUGAGUG	CCCCCUCUCAAAUCCUUGGAACCUAGGUGUGAGUGCUGCUCUAGUGCAACACACCUAUUC
ssc-miR-424-5p	1089	ssc-mir-424	1089	230	334	304	69	66	86	13.71	25.96	23.98	6.81	7.46	9.37	CAGCAGCAAUUCAUGUUUUGAA	UCCGAGGGGAUGCAGCAGCAAUUCAUGUUUUGAAGGGCUUUAAAUGGUUCAAAACGUGAG
ssc-miR-32	1152	ssc-mir-32	1152	105	319	590	41	44	53	6.26	24.79	46.55	4.04	4.97	5.77	UAUUGCACAUUACUAAGUUGC	GGAGAUAUUGCACAUUACUAAGUUGCAUGUUGUCACGGCCUCAGUGCAAUUUAGUGUGUG
ssc-miR-1249	1194	ssc-mir-1249-1	1194	174	113	137	283	228	259	10.37	8.78	10.81	27.92	25.76	28.22	ACGCCCUUCCCCCCCUUCUUCA	UGUUUGCAUGGGGAGGAGGGAGGAGAUGGGCCAAGUUCCCUCUGCCUGGAACGCCCUUCC
ssc-miR-323	1216	ssc-mir-323	1216	385	240	195	153	126	117	22.95	18.65	15.38	15.09	14.24	12.75	GCACAUUACACGGUCGACCUCU	UUGGUACUUGGAGAGAGGUGGUCCGUGGCGCGUUCGCUUUAUUUAUGGCGCACAUUACAC
ssc-miR-421-3p	1249	ssc-mir-421	1249	275	359	353	89	91	82	16.39	27.9	27.85	8.78	10.28	8.93	AUCAACAGACAUUAAUUGGGCGC	ACAUUGUAGGCCUCAUUAAAUGUUUGUUGAAUGAAAAAAUGAAUCAUCAACAGACAUUAA
ssc-miR-361-5p	1354	ssc-mir-361	1354	314	404	332	96	98	110	18.72	31.4	26.19	9.47	11.07	11.99	UUAUCAGAAUCUCCAGGGGUAC	GGAGCUUAUCAGAAUCUCCAGGGGUACUUAUAAUUUGAAAAAGUCCCCCAGGUGUGAUUC
ssc-miR-382	1397	ssc-mir-382	1397	352	283	275	205	136	146	20.98	21.99	21.7	20.22	15.37	15.91	AAGUUGUUCGUGGUGGAUUCG	ACUUGAAGAGAAGUUGUUCGUGGUGGAUUCGCUUUACUUAUGACGAAUCAUUCACGGACA
ssc-miR-129a-3p	1402	ssc-mir-129a	1402	418	319	273	123	123	146	24.92	24.79	21.54	12.13	13.9	15.91	AAGCCCUUACCCCAAAAAGCAU	CUUCGUGAAUCUUUUUGCGGUCUGGGCUUGCUGUACAUAACUCAAUAGCCGGAAGCCCUU
ssc-miR-1839-5p	1410	ssc-mir-1839	1410	510	337	326	74	86	77	30.4	26.19	25.72	7.3	9.72	8.39	AAGGUAGAUAGAACAGGUCUUG	CCUAAAUGAAAAGGUAGAUAGAACAGGUCUUGUUUGCAAGAUGAAUUCAAGACCUACUUU
ssc-miR-29b	1422	ssc-mir-29b-1	1422	198	419	564	67	90	84	11.8	32.56	44.5	6.61	10.17	9.15	UAGCACCAUUUGAAAUCAGUGUU	CUUCAGGAAGCUGGUUUCAUAUGGUGGUUUAGAUUUAAAAAGUGAUUGUCUAGCACCAUU
ssc-miR-224	1441	ssc-mir-224	1441	478	429	349	54	67	64	28.49	33.34	27.53	5.33	7.57	6.97	CAAGUCACUAGUGGUUCCGUUUA	GGGCUUUCAAGUCACUAGUGGUUCCGUUUAGUAGAAGGUUUUGCAUUGUUUCAAAAUGGU
ssc-miR-486	1449	ssc-mir-486-1	1449	306	346	323	152	178	144	18.24	26.89	25.48	15	20.11	15.69	UCCUGUACUGAGCUGCCCCGAG	GCUGGGGCUUCAGGGCCAGCUCGGACCUCUGACCUCCCUGACGGGUCCUGUACUGAGCUG
ssc-miR-20b	1543	ssc-mir-20b-1	1543	336	467	310	169	112	149	20.03	36.29	24.46	16.67	12.65	16.23	CAAAGUGCUCACAGUGCAGGUAG	CCGGCAGUACCAAAGUGCUCACAGUGCAGGUAGGUUUUGCAUUACUCUACUGUAGUGUGG
ssc-miR-499-5p	1619	ssc-mir-499	1619	269	298	436	225	197	194	16.04	23.16	34.4	22.2	22.26	21.14	UUAAGACUUGCAGUGAUGUUU	UGGGCGGGCGGCCGUUAAGACUUGCAGUGAUGUUUAACUCCUCUCCACGUGAACAUCACA
ssc-miR-411	1659	ssc-mir-411	1659	289	303	341	249	243	234	17.23	23.55	26.9	24.57	27.46	25.5	AUGUAACACGGUCCACUAAC	CUUGGAGAGAUAGUAGACCGUAUAGCGUACGCUUUAUCUGUGACGUAUGUAACACGGUCC
ssc-miR-122-5p	1829	ssc-mir-122	1829	289	218	305	361	355	301	17.23	16.94	24.06	35.61	40.11	32.8	UGGAGUGUGACAAUGGUGUUUGU	CCUUAGCAGAGCUGUGGAGUGUGACAAUGGUGUUUGUGUCCAAACUAUCAAACGCCAUUA
ssc-let-7f-3p	1838	ssc-let-7f-2	1838	291	419	351	288	269	220	17.35	32.56	27.69	28.41	30.39	23.97	CUAUACAAUCUAUUGCCUUCC	UCUAUCAGAGUGAGGUAGUAGAUUGUAUAGUUGUGGGGUAGUGAUUUUACCCUGUUCAGG
ssc-miR-493-5p	1871	ssc-mir-493	1871	628	367	321	197	167	191	37.44	28.52	25.32	19.44	18.87	20.81	UUGUACAUGGUAGGCUUUCAUU	CCCCAGGGCCUUGUACAUGGUAGGCUUUCAUUCAUUCGUUUGCACAUGCGGUGAAGGUCU
ssc-miR-19b	1889	ssc-mir-19b-1	1889	434	373	410	219	202	251	25.87	28.99	32.35	21.61	22.82	27.35	UGUGCAAAUCCAUGCAAAACUGA	CUGUUCUAUGGUUAGUUUUGCAGGUUUGCAUCCAGCUGUGUGAUAUUCUGCUGUGCAAAU
ssc-miR-331-5p	1896	ssc-mir-331	1896	276	442	565	207	209	197	16.45	34.35	44.57	20.42	23.61	21.46	UCUAGGUAUGGUCCCAGGGAU	UUGUUUGGGUUUGUUCUAGGUAUGGUCCCAGGGAUCCCAGAUCAAACCAGGCCCCUGGGC
ssc-miR-21-3p	1942	ssc-mir-21	1942	314	387	659	141	215	226	18.72	30.08	51.99	13.91	24.29	24.62	CAACAGCAGUCGAUGGGCUGU	UGUACCACCUUGUCGGGUAGCUUAUCAGACUGAUGUUGACUGUUGAAUCUCAUGGCAACA
ssc-miR-219a	1945	ssc-mir-219a	1945	482	233	277	367	328	258	28.73	18.11	21.85	36.21	37.06	28.11	AGAGUUGAGUCUGGACGUCCCG	CCGCGGCUCUUGAUUGUCCAAACGCAAUUCUCGAGUCUAUAGCUCUGGCCGAGAGUUGAG
ssc-miR-3613	1967	ssc-mir-3613	1967	398	461	606	211	135	156	23.73	35.83	47.81	20.82	15.25	17	UGUUGUACUUUUUUUUUUGU	GGGUUUGGAUUGUUGUACUUUUUUUUUUGUUCGUUGCAUUUUUAGGAACAAAAAAAAAAG
ssc-miR-151-5p	2129	ssc-mir-151	2129	414	571	509	229	210	196	24.68	44.37	40.16	22.59	23.73	21.36	UCGAGGAGCUCACAGUCUAGU	UUUUCCUGCCCUCGAGGAGCUCACAGUCUAGUACGUCUCAUCCCCUACUAGACUGAAGCU
ssc-miR-210	2166	ssc-mir-210	2166	425	494	555	221	225	246	25.34	38.39	43.78	21.8	25.42	26.8	CUGUGCGUGUGACAGCGGCUGA	GCGCAGGGCAGCCACUGCCCACCGCACACUGCGCUGCUCCGGACCCACUGUGCGUGUGAC
ssc-miR-30b-5p	2200	ssc-mir-30b	2200	639	684	538	95	123	121	38.09	53.16	42.44	9.37	13.9	13.18	UGUAAACAUCCUACACUCAGCU	UUUCAGUUCGUGUAAACAUCCUACACUCAGCUGUAAUACAUGGAUUGGCUGGGAGGUGGA
ssc-miR-15b	2416	ssc-mir-15b	2416	659	690	522	160	157	228	39.28	53.62	41.18	15.78	17.74	24.84	UAGCAGCACAUCAUGGUUUACA	UUGAGGCCUUAAAGUACUGUAGCAGCACAUCAUGGUUUACAUACUACAAUCAAGAUGCGA
ssc-miR-146b	2475	ssc-mir-146b	2475	641	474	601	310	236	213	38.21	36.84	47.41	30.58	26.67	23.21	UGAGAACUGAAUUCCAUAGGC	GAACUUUGGCCACCUGGCUCUGAGAACUGAAUUCCAUAGGCUGUGAGCUCUAGCAAAUGC
ssc-miR-1306-5p	2599	ssc-mir-1306	2599	535	580	399	332	337	416	31.89	45.07	31.48	32.75	38.08	45.33	CCACCUCCCCUGCAAACGUCCA	GUCUCCACCACCUCCCCUGCAAACGUCCAGUGAUGCAGAGGUAAUGGACGUUGGCUCUGG
ssc-miR-140-5p	2699	ssc-mir-140	2699	410	589	684	311	380	325	24.44	45.77	53.96	30.68	42.94	35.41	AGUGGUUUUACCCUAUGGUAG	CCUGCCAGUGGUUUUACCCUAUGGUAGGUUACGUCAUGCUGUUCUACCACAGGGUAGAAC
ssc-miR-9843-3p	2705	ssc-mir-9843	2705	707	452	443	349	376	378	42.15	35.13	34.95	34.43	42.48	41.19	UCUGUGAACUAGAAACCUCUGG	UACACAGCUUUCCAGAGGUUUCCAGCUUAUAGGAUAUUCAUAUGGUAGUUCUGUGAACUA
ssc-miR-345-3p	2779	ssc-mir-345-1	2779	516	635	598	360	319	351	30.76	49.35	47.18	35.52	36.04	38.24	CCCUGAACUAGGGGUCUGGAG	AACCCAGGUCUGCUGACUCCUAGUCCAGUGCUUGUGAUGGCUGGUGGGCCCUGAACUAGG
ssc-miR-2366	2792	ssc-mir-2366-1	2792	547	750	742	243	266	244	32.61	58.29	58.54	23.97	30.05	26.59	UGGGUCACAGAAGAGGGUCUGG	GCCCUGGCCCCAGGGUCCUCUUGUCUGAGCCCCAGAAAGAGGAGAGAGCGCUGGGUCACA
ssc-miR-181d-5p	2970	ssc-mir-181d	2970	748	715	665	325	230	287	44.59	55.57	52.46	32.06	25.99	31.27	AACAUUCAUUGUUGUCGGUGGGUU	UCACAAUCAACAUUCAUUGUUGUCGGUGGGUUGUGAGACGGAGGCCAGACCCACCGAGGG
ssc-miR-192	3304	ssc-mir-192	3304	781	996	985	187	196	159	46.56	77.4	77.71	18.45	22.15	17.32	CUGACCUAUGAAUUGACAGCC	GCACAGGGCUCUGACCUAUGAAUUGACAGCCAGUGCUCUCAUCUCCCCUCUGGCUGCCAA
ssc-miR-365-5p	3520	ssc-mir-365-2	3520	776	541	618	581	539	465	46.26	42.04	48.76	57.32	60.9	50.67	GAGGGACUUUCAGGGGCAGCUGU	AAAAAUGAGGGACUUUCAGGGGCAGCUGUGUUUUCUGACUCAGUCAUAAUGCCCCUAAAA
ssc-miR-7142-3p	3538	ssc-mir-7142	3538	793	477	513	554	617	584	47.27	37.07	40.47	54.66	69.71	63.63	UUUGUUGGCUCCUCUGAAGUGA	ACUCUCCGAGGGGCCUUCAAGGGCAAGUUCUUGUCACCUUUGUUGGCUCCUCUGAAGUGA
ssc-miR-455-3p	3664	ssc-mir-455	3664	705	1115	894	351	293	306	42.03	86.65	70.53	34.63	33.11	33.34	GCAGUCCAUGGGCAUAUACAC	UGGCGUGAGGGUAUGUGCCUUUGGACUACAUCGUGGAAGCCAGCACCAUGCAGUCCAUGG
ssc-miR-149	3987	ssc-mir-149	3987	565	846	914	663	562	437	33.68	65.75	72.11	65.41	63.5	47.62	UCUGGCUCCGUGUCUUCACUCCC	GCCCAGGCUCUGGCUCCGUGUCUUCACUCCCGUGUGUGUCCGAGGAGGGAGGGAGGGACG
ssc-miR-574-5p	4054	ssc-mir-574	4054	1062	976	935	338	330	413	63.31	75.85	73.76	33.35	37.29	45	UGAGUGUGUGUGUGUGAGUGUGU	UGGGUGCGGGCGUGUGAGUGUGUGUGUGUGAGUGUGUGUCGCUCCGGGUCCACGCUCAUG
ssc-miR-505	4067	ssc-mir-505	4067	987	1133	939	364	323	321	58.84	88.05	74.08	35.91	36.5	34.98	UCAACACUUGCUGGUUUCCUCU	GCACUCAGUGGGGGAGCCAGGAAGUAUUGAUGUUUCUGCCAGGUUAGCGUCAACACUUGC
ssc-miR-34a	4240	ssc-mir-34a	4240	1159	1230	909	328	261	353	69.09	95.59	71.71	32.36	29.49	38.46	UGGCAGUGUCUUAGCUGGUUGU	UUUCUUUGGCAGUGUCUUAGCUGGUUGUUGUGAGUAAUAGCAAAGGAAGCAAUCAGCAGC
ssc-miR-374a-5p	4601	ssc-mir-374a	4601	790	1207	1346	445	435	378	47.09	93.8	106.19	43.9	49.15	41.19	UUAUAAUACAACCUGAUAAGUG	CAUCGGCCAUUAUAAUACAACCUGAUAAGUGUUACAGCACUUAUCAGGUUGUAUUGUAAU
ssc-miR-769-5p	4735	ssc-mir-769	4735	1447	789	705	662	550	582	86.26	61.32	55.62	65.31	62.14	63.41	UGAGACCUCUGGGUUCUGAGC	UGCGCUCUGACCUGAGACCUCUGGGUUCUGAGCUGUGAUGUUGCUUCCAAGCUGGGAUCU
ssc-miR-214-5p	4933	ssc-mir-214	4933	571	1448	1737	388	375	414	34.04	112.53	137.04	38.28	42.37	45.11	UGCCUGUCUACACUUGCUGUGC	GGCCUGGCUGGACGGAGUUGUCAUGUGUCUGCCUGUCUACACUUGCUGUGCAGAACAUCC
ssc-miR-107	5054	ssc-mir-107	5054	1260	1438	1240	405	315	396	75.11	111.75	97.83	39.96	35.59	43.15	AGCAGCAUUGUACAGGGCUAUCA	UUCUCUCUGCUUUCAGCUUCUUUACAGUGUUGCCUUGUGGCAUGGAGUUCAAGCAGCAUU
ssc-miR-212	5076	ssc-mir-212	5076	1157	1285	1108	578	483	465	68.97	99.86	87.41	57.02	54.57	50.67	ACCUUGGCUCUAGACUGCUUACU	GCGCGCCGGCACCUUGGCUCUAGACUGCUUACUGCCCGGGCCGCCCUCAGUAACAGUCUC
ssc-miR-328	5169	ssc-mir-328	5169	940	1338	1302	631	451	507	56.04	103.98	102.72	62.25	50.96	55.24	CUGGCCCUCUCUGCCCUUCCGU	GGAGCGGGGGGGCAGGAGGGGCUCAGGGAGAAAGUGUGUGCCGCCCCUGGCCCUCUCUGC
ssc-miR-182	5357	ssc-mir-182	5357	1533	1118	973	603	495	635	91.39	86.88	76.76	59.49	55.93	69.19	UUUGGCAAUGGUAGAACUCACACU	UCGCACCGUUUUUGGCAAUGGUAGAACUCACACUGGUGAGAUAAUGGGAUCCGGUGGUUC
ssc-miR-10384	5519	ssc-mir-10384-1	5519	1173	1045	1117	748	762	674	69.93	81.21	88.12	73.79	86.1	73.44	CCCUGCGUGGCUUCUCUGUGCA	GCCCCUGCGUGGCUUCUCUGUGCAGUCUUUUCUUCUGGGACCUGCACAGGAAGGCCACGG
ssc-miR-500-3p	5592	ssc-mir-500	5592	1767	1147	857	583	573	665	105.34	89.14	67.61	57.52	64.74	72.46	AUGCACCUGGGCAAGGAUUCU	CCCCUCUCUAAUCCUUGCUACCUGGGUGAGAGUGCUGUGUGAAUGCAAUGCACCUGGGCA
ssc-miR-2320-5p	5705	ssc-mir-2320	5705	1473	1658	1326	457	366	425	87.81	128.85	104.61	45.09	41.35	46.31	UGGCACAGGGUCCAGCUGUCGG	GCUGUCCCCAUGGCACAGGGUCCAGCUGUCGGCUGUAAUACCCGAUGGGUCGAUGAUGGU
ssc-miR-9-1	5849	ssc-mir-9-1	5849	1197	1002	1130	877	838	805	71.36	77.87	89.15	86.52	94.68	87.71	UCUUUGGUUAUCUAGCUGUAUGA	CGGGGUUGGUUGUUAUCUUUGGUUAUCUAGCUGUAUGAGUGGUGUGGAGUCUUCAUAAAG
ssc-miR-9-2	5849	ssc-mir-9-1	5849	1197	1002	1130	877	838	805	71.36	77.87	89.15	86.52	94.68	87.71	UCUUUGGUUAUCUAGCUGUAUGA	CGGGGUUGGUUGUUAUCUUUGGUUAUCUAGCUGUAUGAGUGGUGUGGAGUCUUCAUAAAG
ssc-miR-9	5849	ssc-mir-9-1	5849	1197	1002	1130	877	838	805	71.36	77.87	89.15	86.52	94.68	87.71	UCUUUGGUUAUCUAGCUGUAUG	CGGGGUUGGUUGUUAUCUUUGGUUAUCUAGCUGUAUGAGUGGUGUGGAGUCUUCAUAAAG
ssc-miR-143-5p	5874	ssc-mir-143	5874	1096	1828	1420	528	464	538	65.34	142.06	112.03	52.09	52.43	58.62	GGUGCAGUGCUGCAUCUCUGG	GUCCCCCAGCCGGAGGUGCAGUGCUGCAUCUCUGGUCAGCUGGGAGUCUGAGAUGAAGCA
ssc-miR-126-3p	6090	ssc-mir-126	6090	642	1729	1945	663	550	561	38.27	134.37	153.44	65.41	62.14	61.13	UCGUACCGUGAGUAAUAAUGCG	CGACGGGACAUUAUUACUUUUGGUACGCGCUGUGACACUUCAAACUCGUACCGUGAGUAA
ssc-miR-27b-5p	6400	ssc-mir-27b	6400	2027	1310	1329	761	514	459	120.83	101.8	104.85	75.08	58.08	50.01	AGAGCUUAGCUGAUUGGUGAACA	ACGAGGUGCAGAGCUUAGCUGAUUGGUGAACAGUGACUGGUUUCCGCUUUGUUCACAGUG
ssc-miR-183	6489	ssc-mir-183	6489	1656	1272	1108	946	794	713	98.72	98.85	87.41	93.33	89.71	77.69	UAUGGCACUGGUAGAAUUCACUG	CUGUGUAUGGCACUGGUAGAAUUCACUGUGAACAGUCUCGGUCAGUGAAUUACCGAAGGG
ssc-miR-1343	6514	ssc-mir-1343	6514	1132	1074	1016	1171	1013	1108	67.48	83.46	80.15	115.53	114.46	120.73	CUCCUGGGGCCCGCACUCUCGC	GCUUCGGUGCUGGGGAGCGGCCCCCGGGCGGGCCUCUGCUCUGGCCCCUCCUGGGGCCCG
ssc-miR-16	6679	ssc-mir-16-1	6679	1438	1954	1833	521	368	565	85.72	151.85	144.61	51.4	41.58	61.56	UAGCAGCACGUAAAUAUUGGCG	UCCGCUCUAGCAGCACGUAAAUAUUGGCGUAGUAAAAUAAAUAUUAAACACCAAUAUUAU
ssc-miR-424-3p	7203	ssc-mir-424	7203	1215	1264	1763	1158	1079	724	72.43	98.23	139.09	114.24	121.91	78.89	CAAAACGUGAGGCGCUGCUAU	UCCGAGGGGAUGCAGCAGCAAUUCAUGUUUUGAAGGGCUUUAAAUGGUUCAAAACGUGAG
ssc-miR-425-5p	7343	ssc-mir-425	7343	1522	1935	1980	755	554	597	90.73	150.38	156.21	74.49	62.6	65.05	AAUGACACGAUCACUCCCGUUGA	AAGUGCUUUGGAAUGACACGAUCACUCCCGUUGAGUGGGCACCCAAGUAGCCAUCGGGAA
ssc-miR-365-3p	7387	ssc-mir-365-1	7387	2137	1799	1347	857	534	713	127.39	139.81	106.27	84.55	60.34	77.69	UAAUGCCCCUAAAAAUCCUUAU	CGCAGGGAAAAUGAGGGACUUUUGGGGGCAGAUGUGUUUCCAUUCCACUAUCAUAAUGCC
ssc-miR-132	7432	ssc-mir-132	7432	1598	1913	1988	699	561	673	95.26	148.67	156.84	68.96	63.39	73.33	UAACAGUCUACAGCCAUGGUCG	CUCCAGGGCAACCGUGGCUUUCGAUUGUUACUGUGGGAACCGGAGGUAACAGUCUACAGC
ssc-miR-574-3p	7832	ssc-mir-574	7832	1398	2055	1765	1027	841	746	83.34	159.7	139.24	101.32	95.02	81.28	CACGCUCAUGCACACACCCACA	UGGGUGCGGGCGUGUGAGUGUGUGUGUGUGAGUGUGUGUCGCUCCGGGUCCACGCUCAUG
ssc-miR-22-5p	7839	ssc-mir-22	7839	920	1766	2431	1005	843	874	54.84	137.24	191.79	99.15	95.25	95.23	AGUUCUUCAGUGGCAAGCUUUA	GAGCCGCAGUAGUUCUUCAGUGGCAAGCUUUAUGUCCUGACCCAGCUAAAGCUGCCAGUU
ssc-miR-7134-5p	8004	ssc-mir-7134	8004	1614	1238	1335	1382	1203	1232	96.21	96.21	105.32	136.34	135.92	134.24	AUGUCCGCGGGUUCCCUAUCC	AUGUCCGCGGGUUCCCUAUCCCGGGUUGGUUGAGUUCGCGGAUGCGGAACCUGCGGAUAC
ssc-miR-6782-3p	8328	ssc-mir-6782	8328	2514	1224	991	1201	1082	1316	149.87	95.12	78.18	118.49	122.25	143.39	UGACCUCUGGUCUCCCGCCCUG	CCUGCGGGUGGUGUGGGGGAAGGCAGGGGUGCGGCCUCCAGCCUGACCUCUGGUCUCCCG
ssc-miR-2320-3p	8422	ssc-mir-2320	8422	1677	1060	1243	1490	1581	1371	99.97	82.38	98.06	147	178.63	149.38	CGAUGAUGGUCCCUGUGUUUG	GCUGUCCCCAUGGCACAGGGUCCAGCUGUCGGCUGUAAUACCCGAUGGGUCGAUGAUGGU
ssc-miR-676-3p	8463	ssc-mir-676-1	8463	1664	1556	1516	1426	1126	1175	99.19	120.92	119.6	140.68	127.22	128.03	CCGUCCUAAGGUUGUUGAGUU	AACGCGUGACUCUUCAAUCUCAGGACUCGCAUAAUUAGCAGAAUGCCGUCCUAAGGUUGU
ssc-miR-4334-3p	9412	ssc-mir-339-1	9412	1919	3117	2518	580	541	737	114.4	242.23	198.65	57.22	61.13	80.3	UCCCUGUCCUCCAGGAGCUC	GCAGCCGCCGUCCCUGUCCUCCAGGAGCUCACUUACCUUGGGCCGUGAGCUCCUCGAGGC
ssc-miR-339-5p	9414	ssc-mir-339-1	9414	1920	3117	2519	580	541	737	114.46	242.23	198.73	57.22	61.13	80.3	UCCCUGUCCUCCAGGAGCUCAC	GCAGCCGCCGUCCCUGUCCUCCAGGAGCUCACUUACCUUGGGCCGUGAGCUCCUCGAGGC
ssc-miR-339	9414	ssc-mir-339-1	9414	1920	3117	2519	580	541	737	114.46	242.23	198.73	57.22	61.13	80.3	UCCCUGUCCUCCAGGAGCUCA	GCAGCCGCCGUCCCUGUCCUCCAGGAGCUCACUUACCUUGGGCCGUGAGCUCCUCGAGGC
ssc-miR-340	9436	ssc-mir-340-1	9436	2512	1761	1929	1124	998	1112	149.75	136.85	152.18	110.89	112.76	121.16	UUAUAAAGCAAUGAGACUGAUU	UACCUGGUGUGAUUAUAAAGCAAUGAGACUGAUUGUCAUAUGUCGUUUGUGGGAUCCGUC
ssc-miR-148a-5p	10194	ssc-mir-148a	10194	2924	2201	2133	1014	962	960	174.31	171.05	168.28	100.04	108.69	104.6	AAAGUUCUGAGACACUCCGACU	GAGGCAAAGUUCUGAGACACUCCGACUCUGAAUAUGAUAGAAGUCAGUGCACUACAGAAC
ssc-miR-542-3p	10272	ssc-mir-542	10272	3270	1701	1667	1284	1097	1253	194.93	132.19	131.51	126.67	123.95	136.53	UGUGACAGAUUGAUAACUGAAA	CCUCAGACGUCUCGGGGAUCAUCAUGUCACGAGAGACCACUGUGCACUUGUGACAGAUUG
ssc-miR-370	10309	ssc-mir-370	10309	2083	2590	2696	1032	1085	823	124.17	201.28	212.69	101.81	122.59	89.67	GCCUGCUGGGGUGGAACCUGGU	AAGACAGAGAAGCCAGGUCACGUCUCUGCAGUUACACAGCUCACGAGUGCCUGCUGGGGU
ssc-miR-374a-3p	10558	ssc-mir-374a	10558	2981	1712	2087	1386	1164	1228	177.7	133.05	164.65	136.74	131.52	133.8	CUUAUCAGGUUGUAUUGUAAUU	CAUCGGCCAUUAUAAUACAACCUGAUAAGUGUUACAGCACUUAUCAGGUUGUAUUGUAAU
ssc-miR-374b-5p	10870	ssc-mir-374b	10870	3105	2593	2178	1131	822	1041	185.1	201.51	171.83	111.58	92.88	113.43	AUAUAAUACAACCUGCUAAGUG	UCGGAUGGAUAUAAUACAACCUGCUAAGUGUCCUAGCACUUAUCAGGUUGUAUUAUCAUU
ssc-miR-181b	11374	ssc-mir-181b-1	11374	2491	3141	2892	1084	862	904	148.49	244.1	228.16	106.94	97.4	98.5	AACAUUCAUUGCUGUCGGUGGGUU	GGUCACAAUCAACAUUCAUUGCUGUCGGUGGGUUGAACUGUGUAGACAAGCUCACUGAAC
ssc-miR-214-3p	11546	ssc-mir-214	11546	2817	3148	2334	1074	872	1301	167.93	244.64	184.13	105.96	98.53	141.76	ACAGCAGGCACAGACAGGCAG	GGCCUGGCUGGACGGAGUUGUCAUGUGUCUGCCUGUCUACACUUGCUGUGCAGAACAUCC
ssc-miR-30a-3p	11596	ssc-mir-30a	11596	2286	1792	1983	2000	1840	1695	136.27	139.26	156.44	197.31	207.9	184.69	CUUUCAGUCGGAUGUUUGCAGC	UCCCUGCGACAGUGAGCGGCUGUAAACAUCCUCGACUGGAAGCUGUGAGGCUGAAGACGG
ssc-miR-671-3p	11963	ssc-mir-671	11963	2886	1470	1755	2095	1998	1759	172.04	114.24	138.46	206.68	225.75	191.66	UCCGGUUCUCAGGGCUCCACC	CAGGAAGAGGAGGAAGCCCUGGAGGGGCUGGAGGUGAUGGAUGUUUUCCUCCGGUUCUCA
ssc-miR-181a	12524	ssc-mir-181a-1	12524	2181	3173	3204	1573	1188	1205	130.01	246.59	252.77	155.19	134.23	131.3	AACAUUCAACGCUGUCGGUGAGUU	GAGUUUAGAGGUUGCUUCAGUGAACAUUCAACGCUGUCGGUGAGUUUGGAAUUCAAAUCA
ssc-miR-615	12748	ssc-mir-615	12748	1903	1877	2979	2017	2039	1933	113.44	145.87	235.02	198.99	230.38	210.62	UCCGAGCCUGGGUCUCCCUCU	GGGAGGGGCGGGAGGGGGCUCCCCGGUGCUCGGAUCUCGAGGGUGCUUAUUGUUCGGUCC
ssc-miR-503	15981	ssc-mir-503	15981	4349	3555	3205	1712	1477	1683	259.25	276.27	252.85	168.9	166.88	183.38	UAGCAGCGGGAACAGUACUGCAG	GCCCCGCACUCAGCCGUGCCCUAGCAGCGGGAACAGUACUGCAGUGGGCGAUCGGUACUC
ssc-miR-92b-3p	15998	ssc-mir-92b	15998	3530	2677	2239	2457	2860	2235	210.43	208.04	176.64	242.4	323.15	243.52	UAUUGCACUCGUCCCGGCCUCC	GCGGGCGGGAGGGACGGGACGCGGUGCAGUGUUGUUCUUUCCCCUGCCAAUAUUGCACUC
ssc-miR-28-5p	16287	ssc-mir-28	16287	1926	4110	4868	1860	1702	1821	114.81	319.4	384.05	183.5	192.31	198.41	AAGGAGCUCACAGUCUAUUGAG	GGUCCUUGCCCUCAAGGAGCUCACAGUCUAUUGAGUUGCCUUUCUGUCUUCCCCACUAGA
ssc-miR-363	17055	ssc-mir-363-1	17055	2078	3685	4967	2068	2214	2043	123.87	286.37	391.86	204.02	250.16	222.6	AAUUGCACGGUAUCCAUCUGUAA	GCUGUUGUCGGGUGGAUCACGAUGCAAUUUUGAUUAGUAUCAUAGGAGAAAAAUUGCACG
ssc-let-7d-3p	17576	ssc-let-7d	17576	2519	3436	3527	2585	3174	2335	150.16	267.02	278.25	255.03	358.62	254.42	CUAUACGACCUGCUGCCUUUCU	GUUCCUAGGAAGAGGUAGUAGGUUGCAUAGUUUUAGGGCAGAGAUUUUGCCCACAAGGAG
ssc-miR-455-5p	18192	ssc-mir-455	18192	3177	4782	4909	1893	1700	1731	189.39	371.63	387.28	186.76	192.08	188.61	UAUGUGCCUUUGGACUACAUCG	UGGCGUGAGGGUAUGUGCCUUUGGACUACAUCGUGGAAGCCAGCACCAUGCAGUCCAUGG
ssc-miR-186-5p	18424	ssc-mir-186	18424	3140	4918	4896	1982	1623	1865	187.18	382.2	386.25	195.54	183.38	203.21	CAAAGAAUUCUCCUUUUGGGCUU	UGCUUAUAACUUUCCAAAGAAUUCUCCUUUUGGGCUUUAUGAUUUUAUUUUAAGCCCAAA
ssc-miR-193a-5p	18473	ssc-mir-193a	18473	3854	3539	3382	2747	2471	2480	229.75	275.03	266.81	271.01	279.19	270.22	UGGGUCUUUGCGGGCGAGAUGA	GCGGGAGCUGAGGGCUGGGUCUUUGCGGGCGAGAUGAGGGUGUUGGUUCAACUGGCCUAC
ssc-miR-17-5p	19106	ssc-mir-17	19106	3390	5237	4629	1893	1750	2207	202.09	406.99	365.19	186.76	197.73	240.47	CAAAGUGCUUACAGUGCAGGUAG	GAAUAAUGUCAAAGUGCUUACAGUGCAGGUAGUGAUAAUGUGCAUCUACUGCAGUGAAGG
ssc-miR-24-1-5p	19406	ssc-mir-24-1	19406	2718	4309	5107	2483	2404	2385	162.03	334.87	402.9	244.96	271.62	259.87	GUGCCUACUGAGCUGAAACACAGU	CUCUGCCUCCCGUGCCUACUGAGCUGAAACACAGUUGAUUUGUGCAGACUGGCUCAGUUC
ssc-miR-361-3p	20476	ssc-mir-361	20476	4154	3726	4027	2965	2884	2720	247.63	289.56	317.7	292.51	325.86	296.37	CCCCCAGGUGUGAUUCUGAUUUGC	GGAGCUUAUCAGAAUCUCCAGGGGUACUUAUAAUUUGAAAAAGUCCCCCAGGUGUGAUUC
ssc-miR-296-3p	21023	ssc-mir-296	21023	5056	4585	4458	2271	2244	2409	301.4	356.32	351.7	224.05	253.55	262.48	AGGGUUGGGCGGAGGCUUUCC	GACCCUUCCGGAGGGCCCCCCCCAAUCCUGUUGUGCUGGAUUCAGAGGGUUGGGCGGAGG
ssc-miR-145-3p	21668	ssc-mir-145	21668	3924	5335	5393	2826	2199	1991	233.92	414.6	425.46	278.8	248.46	216.94	GGAUUCCUGGAAAUACUGUUCU	CACCUUGUCCUCACGGUCCAGUUUUCCCAGGAAUCCCUUAGAUGCUGAGAUGGGGAUUCC
ssc-miR-7857-3p	23220	ssc-mir-7857	23220	4251	5378	5200	2834	2880	2677	253.41	417.94	410.24	279.59	325.41	291.68	AUUGUUCUCCAACCUGGCUCUU	CUAUUGAAGCAUAGCCAGUUUGGGAAGAAUGCUGUUACCCUCAAGGAAGAAACUGGAUUG
ssc-miR-20a-5p	24354	ssc-mir-20a	24354	4886	6385	5648	2423	2170	2842	291.27	496.2	445.58	239.04	245.18	309.66	UAAAGUGCUUAUAGUGCAGGUA	GUAGCACUAAAGUGCUUAUAGUGCAGGUAGUGUUUAGUUAUCUACUGCAUUAUGAGCACU
ssc-miR-130b-5p	24597	ssc-mir-130b	24597	4922	4285	4693	3589	3776	3332	293.41	333	370.24	354.08	426.64	363.05	ACUCUUUCCCUGUUGCACUACU	GCCUGCCUGACACUCUUUCCCUGUUGCACUACUGUGGGCCACUGGGAAGCAGUGCAAUGA
ssc-miR-221-5p	25956	ssc-mir-221	25956	9174	4682	3780	3018	2627	2675	546.88	363.86	298.21	297.74	296.82	291.47	ACCUGGCAUACAAUGUAGAUUUCUGU	UGAACCUGGCAUACAAUGUAGAUUUCUGUGUUUGUUGGGCAACAGCUACAUUGUCUGCUG
ssc-miR-140-3p	26897	ssc-mir-140	26897	8659	5560	3638	3016	2543	3481	516.18	432.09	287.01	297.55	287.33	379.29	UACCACAGGGUAGAACCACGGAC	CCUGCCAGUGGUUUUACCCUAUGGUAGGUUACGUCAUGCUGUUCUACCACAGGGUAGAAC
ssc-miR-30e-5p	26967	ssc-mir-30e	26967	5399	5348	6869	2934	3106	3311	321.85	415.61	541.91	289.46	350.94	360.76	UGUAAACAUCCUUGACUGGAAGCU	UUUGCCACUGUAAACAUCCUUGACUGGAAGCUGUGAGGCGUUCCCAGGAGCUUUCAGUCG
ssc-miR-450a	29107	ssc-mir-450a	29107	6440	5408	6900	3996	3185	3178	383.9	420.28	544.35	394.23	359.87	346.27	UUUUGCGAUGUGUUCCUAAUAU	GUCUGUCAAAGAAAGAUGCUAAACUGGUUUUGCGAUGUGUUCCUAAUAUGCAGUAUAAAU
ssc-miR-218-5p	29170	ssc-mir-218-1	29170	4504	7566	9162	2765	2627	2546	268.49	587.98	722.81	272.78	296.82	277.41	UUGUGCUUGAUCUAACCAUGU	AGAUUUUCUGUUGUGCUUGAUCUAACCAUGUGGUUGCCAGGUAUGAGUAAAACAUGGUUC
ssc-miR-218	29170	ssc-mir-218-1	29170	4504	7566	9162	2765	2627	2546	268.49	587.98	722.81	272.78	296.82	277.41	UUGUGCUUGAUCUAACCAUGU	AGAUUUUCUGUUGUGCUUGAUCUAACCAUGUGGUUGCCAGGUAUGAGUAAAACAUGGUUC
ssc-miR-218b	29333	ssc-mir-218-1	29333	4533	7625	9212	2773	2640	2550	270.22	592.57	726.75	273.57	298.29	277.85	UUGUGCUUGAUCUAACCAUGUG	AGAUUUUCUGUUGUGCUUGAUCUAACCAUGUGGUUGCCAGGUAUGAGUAAAACAUGGUUC
ssc-miR-30c-5p	31550	ssc-mir-30c-1	31550	7276	9666	9312	1772	1593	1931	433.74	751.18	734.64	174.82	179.99	210.4	UGUAAACAUCCUACACUCUCAGC	CGUAGUGCGUGUAAACAUCCUACACUCUCAGCUGUGAGCUCGAGGUGGCUGGGAGAGGGU
ssc-miR-146a-5p	35151	ssc-mir-146a	35151	5593	10435	9063	3740	3080	3240	333.41	810.94	715	368.97	348	353.03	UGAGAACUGAAUUCCAUGGGUU	UACUCAGCUUUGAGAACUGAAUUCCAUGGGUUGUGUCAUUGUCAGACCUGUGAAGUUUAG
ssc-miR-155-5p	37935	ssc-mir-155	37935	9550	10856	9663	2940	2353	2573	569.3	843.66	762.33	290.05	265.86	280.35	UUAAUGCUAAUUGUGAUAGGGG	CUAUAUGCUGUUAAUGCUAAUUGUGAUAGGGGUUUUUACCUCCGUCUGACUCCUACAUGU
ssc-miR-1307	40136	ssc-mir-1307	40136	7393	6383	7222	6290	6359	6489	440.71	496.05	569.76	620.55	718.49	707.04	ACUCGGCGUGGCGUCGGUCGUG	CUACCAAUCUCGACCGGACCUCGACCGGCUCGUCUAUGUUGCCAAUCGACUCGGCGUGGC
ssc-miR-1	40422	ssc-mir-1	40422	11149	5794	5022	7424	4828	6205	664.62	450.27	396.19	732.42	545.51	676.09	UGGAAUGUAAAGAAGUAUGUA	CCGGUUGACGUACCUGCUUGGGGGACAUACUUCUUUAUGUGCCCAUAUGGACCUGCUAAG
ssc-miR-1271-5p	40788	ssc-mir-1271	40788	10662	7647	6686	5505	5218	5070	635.59	594.28	527.47	543.1	589.57	552.42	CUUGGCACCUAGUAAGCACUC	UAGAUCAGUGCUUGGCACCUAGUAAGCACUCAGUAUAUACUUGUUGAGUGCCUGCUAUGU
ssc-miR-26b-5p	41796	ssc-mir-26b	41796	8178	12845	11429	3451	2704	3189	487.51	998.23	901.66	340.46	305.52	347.47	UUCAAGUAAUUCAGGAUAGGUU	CCCAGUUCAAGUAAUUCAGGAUAGGUUGUGUGCUGUCCAGCCUGUUCUCCAUUACUUGGC
ssc-miR-30e-3p	44722	ssc-mir-30e	44722	9376	6937	6517	7562	7196	7134	558.93	539.1	514.14	746.04	813.06	777.32	CUUUCAGUCGGAUGUUUACAGC	UUUGCCACUGUAAACAUCCUUGACUGGAAGCUGUGAGGCGUUCCCAGGAGCUUUCAGUCG
ssc-miR-7134-3p	45267	ssc-mir-7134	45267	10852	8128	7139	6842	6266	6040	646.91	631.66	563.21	675	707.98	658.11	AUGCGGAACCUGCGGAUACGG	AUGUCCGCGGGUUCCCUAUCCCGGGUUGGUUGAGUUCGCGGAUGCGGAACCUGCGGAUAC
ssc-miR-378b-3p	46466	ssc-mir-378b	46466	11026	8677	7297	6742	6266	6458	657.29	674.32	575.67	665.14	707.98	703.66	ACUGGACUUGGAGUCAGAAGU	UUGAGCUACAUUUGCUUGCGUUCUCUAAGUGUCUGGCUGAAAACGCACUGGACUUGGAGU
ssc-miR-127	47252	ssc-mir-127	47252	15144	8279	7217	6103	5176	5333	902.77	643.39	569.36	602.1	584.83	581.08	UCGGAUCCGUCUGAGCUUGGCU	AUCGCUGUCUCCAGCCUGCUGAAGCUCAGAGGGCUCUGAUUCAGAAAGAUCAUCGGAUCC
ssc-miR-744	47380	ssc-mir-744	47380	7066	8249	9100	7822	7815	7328	421.22	641.06	717.92	771.69	883	798.45	UGCGGGGCUAGGGCUAACAGCA	GCAGGGUGCGGGGCUAGGGCUAACAGCAGUCUUACUGAAGGUUUCCUGGAAACCACGCAC
ssc-miR-23b	49639	ssc-mir-23b	49639	12527	13265	10860	4971	3749	4267	746.76	1030.87	856.77	490.42	423.59	464.93	AUCACAUUGCCAGGGAUUACCA	CUCUGGCUGCUUGGGUUCCUGGCAUGCUGAUUUGUGACUUAAGAUUAAAAUCACAUUGCC
ssc-miR-6529	49994	ssc-mir-6529	49994	9196	8492	8826	7937	8167	7376	548.2	659.94	696.3	783.03	922.77	803.68	GAGAGAUCAGAGGCGCAGAGU	ACCUGUUCUCUUGAGAGAUCAGAGGCGCAGAGUGCGUCAAUGUCAGUGAAGCCUGUGCCU
ssc-miR-30a-5p	50604	ssc-mir-30a	50604	14946	8602	7925	6020	6411	6700	890.97	668.49	625.22	593.91	724.37	730.03	UGUAAACAUCCUCGACUGGAAG	UCCCUGCGACAGUGAGCGGCUGUAAACAUCCUCGACUGGAAGCUGUGAGGCUGAAGACGG
ssc-miR-450c-5p	51260	ssc-mir-450c	51260	9693	10806	13794	6466	5065	5436	577.82	839.77	1088.23	637.91	572.28	592.3	UUUUGCGAUGUGUUCCUAAUAC	GGCACUAAACUAUUUUUGCGAUGUGUUCCUAAUACGUAAUCUAAGUGUAUUGGGAACAUU
ssc-miR-320	57712	ssc-mir-320	57712	11389	12040	12595	7288	6840	7560	678.93	935.67	993.64	719	772.84	823.73	AAAAGCUGGGUUGAGAGGGCGAA	GCUCCCCUCCGCCUUCUCUUCCCGGUUCUUCCCGGAGUCGGGAAAAGCUGGGUUGAGAGG
ssc-miR-101	61095	ssc-mir-101-1	61095	14531	9533	10766	8116	8671	9478	866.23	740.84	849.35	800.69	979.72	1032.72	UACAGUACUGUGAUAACUGAA	GACUGAACUGUCCUUUUUCGGUUAUCAUGGUACCGAUGCUGUAUAUCUGAAAGGUACAGU
ssc-miR-185	65213	ssc-mir-185	65213	14375	18708	14412	5481	4921	7316	856.93	1453.87	1136.99	540.73	556.01	797.15	UGGAGAGAAAGGCAGUUCCUGA	GGUGAGGGAUUGGAGAGAAAGGCAGUUCCUGAUGGUCCCCUCCCCAGGGGCUGGCUUUCC
ssc-miR-191	75370	ssc-mir-191	75370	13561	22591	21423	6266	5360	6169	808.4	1755.63	1690.1	618.18	605.62	672.17	CAACGGAAUCCCAAAAGCAGCUG	ACAGCGGGCAACGGAAUCCCAAAAGCAGCUGUUGUCUCCAGAGCAUUCCAGCUGCACUUG
ssc-miR-98	79195	ssc-mir-98	79195	14857	19196	21990	9014	7019	7119	885.66	1491.79	1734.83	889.28	793.06	775.68	UGAGGUAGUAAGUUGUAUUGUU	GGGUGAGGUAGUAAGUUGUAUUGUUGUGGGGUAGGGAUUUUAGGCCCCAAUUAGAAGAUA
ssc-miR-450b-5p	79561	ssc-mir-450b	79561	25620	14887	15011	9465	6996	7582	1527.27	1156.92	1184.25	933.78	790.46	826.13	UUUUGCAAUAUGUUCCUGAAUA	AAAAUUAUUUUUGCAAUAUGUUCCUGAAUAUGUAAUAUAAGUAUAUUGGGAACAUUUUGC
ssc-miR-103	80782	ssc-mir-103-1	80782	22682	20984	15579	6795	6264	8478	1352.13	1630.74	1229.06	670.37	707.76	923.76	AGCAGCAUUGUACAGGGCUAUGA	CUUACUGCCCUCGGCUUCUUUACAGUGCUGCCUUGUUGCAUAUGGAUCAAGCAGCAUUGU
ssc-miR-145-5p	83019	ssc-mir-145	83019	25283	19979	11369	10688	6847	8853	1507.18	1552.64	896.92	1054.43	773.63	964.62	GUCCAGUUUUCCCAGGAAUCCCUU	CACCUUGUCCUCACGGUCCAGUUUUCCCAGGAAUCCCUUAGAUGCUGAGAUGGGGAUUCC
ssc-miR-29a-3p	84160	ssc-mir-29a	84160	13281	25369	26610	6192	6198	6510	791.71	1971.52	2099.31	610.88	700.3	709.32	CUAGCACCAUCUGAAAUCGGUUA	CCCCUUAGAGGAUGACUGAUUUCUUUUGGUGUUCAGAGUCAAUAUAAUUUUCUAGCACCA
ssc-miR-22-3p	88173	ssc-mir-22	88173	10971	16355	22136	14462	13648	10601	654.01	1271.01	1746.35	1426.76	1542.06	1155.08	AAGCUGCCAGUUGAAGAACUGU	GAGCCGCAGUAGUUCUUCAGUGGCAAGCUUUAUGUCCUGACCCAGCUAAAGCUGCCAGUU
ssc-miR-125a	93767	ssc-mir-125a	93767	13645	25385	23353	11203	10302	9879	813.41	1972.76	1842.36	1105.24	1164	1076.41	UCCCUGAGACCCUUUAACCUGUG	GGCCUCUGAGUCCCUGAGACCCUUUAACCUGUGAGGACAUCCAGGGUCACAGGUGAGGUU
ssc-miR-532-5p	96599	ssc-mir-532	96599	25576	10386	10654	18603	15920	15460	1524.65	807.13	840.51	1835.29	1798.77	1684.51	CAUGCCUUGAGUGUAGGACCGU	UUGCUUUCUCUCUUACAUGCCUUGAGUGUAGGACCGUUGGCAUCUGAAUACCCUCCCACA
ssc-miR-128	97915	ssc-mir-128-1	97915	14313	16777	22506	14951	15327	14041	853.23	1303.8	1775.54	1475	1731.77	1529.9	UCACAGUGAACCGGUCUCUUU	UGAGCUGUUGGAUUCGGGGCCGUAGCACUGUCUGAGAGGUUUACAUUUCUCACAGUGAAC
ssc-miR-23a	99470	ssc-mir-23a	99470	28690	26226	19379	9229	7145	8801	1710.28	2038.12	1528.85	910.49	807.3	958.95	AUCACAUUGCCAGGGAUUUCC	CGGCUGGGGUUCCUGGGGAUGGGAUUUGCUGCCUGUCACAAAUCACAUUGCCAGGGAUUU
ssc-let-7d-5p	122585	ssc-let-7d	122585	19649	32497	35884	12191	11123	11241	1171.32	2525.46	2830.96	1202.71	1256.77	1224.81	AGAGGUAGUAGGUUGCAUAGUU	GUUCCUAGGAAGAGGUAGUAGGUUGCAUAGUUUUAGGGCAGAGAUUUUGCCCACAAGGAG
ssc-miR-148b-3p	122894	ssc-mir-148b	122894	41112	21117	18049	14463	13335	14818	2450.78	1641.08	1423.92	1426.86	1506.7	1614.56	UCAGUGCAUCACAGAACUUUGU	AUUUGAGGUGAAGUUCUGUUAUACACUCAGGCUGUGGCUCUCUGAAAGUCAGUGCAUCAC
ssc-miR-423-3p	126195	ssc-mir-423	126195	24818	22118	23525	19336	18559	17839	1479.46	1718.87	1855.93	1907.61	2096.94	1943.72	AGCUCGGUCUGAGGCCCCUCAGU	AAGUUAGGCUGAGGGGCAGAGAGCGAGACUUUUCUAUUUUCCAAAAGCUCGGUCUGAGGC
ssc-miR-423-5p	137744	ssc-mir-423	137744	25531	18230	20326	26255	25770	21632	1521.96	1416.72	1603.56	2590.21	2911.7	2357.01	UGAGGGGCAGAGAGCGAGACUUU	AAGUUAGGCUGAGGGGCAGAGAGCGAGACUUUUCUAUUUUCCAAAAGCUCGGUCUGAGGC
ssc-miR-129a-5p	148666	ssc-mir-129a	148666	37551	18356	21764	23859	24501	22635	2238.5	1426.51	1717	2353.83	2768.32	2466.29	CUUUUUGCGGUCUGGGCUUGC	CUUCGUGAAUCUUUUUGCGGUCUGGGCUUGCUGUACAUAACUCAAUAGCCGGAAGCCCUU
ssc-miR-129b	148666	ssc-mir-129a	148666	37551	18356	21764	23859	24501	22635	2238.5	1426.51	1717	2353.83	2768.32	2466.29	CUUUUUGCGGUCUGGGCUUGC	CUUCGUGAAUCUUUUUGCGGUCUGGGCUUGCUGUACAUAACUCAAUAGCCGGAAGCCCUU
ssc-let-7e	159921	ssc-let-7e	159921	40960	28239	27495	22313	19752	21162	2441.72	2194.56	2169.13	2201.31	2231.74	2305.8	UGAGGUAGGAGGUUGUAUAGUU	GCCCCGGGCUGAGGUAGGAGGUUGUAUAGUUGAGGAGGACACCCACGGAGAUCACUAUAC
ssc-miR-152	176165	ssc-mir-152	176165	45793	34825	27113	24852	20170	23412	2729.83	2706.38	2138.99	2451.79	2278.97	2550.95	UCAGUGCAUGACAGAACUUGG	CGGCCCAGGUUCUGUGAUACACUCCGACUCGGGCUCUGGAGCAGUCAGUGCAUGACAGAA
ssc-miR-381-3p	179530	ssc-mir-381	179530	38036	40985	43327	18221	19099	19862	2267.42	3185.1	3418.15	1797.61	2157.96	2164.15	UAUACAAGGACAAGCUCUCUGU	UGGUACUUAAAGCGAGGUUGCCCUUUGUAUAUUCGGGUUUUGAGGUGGAAUAUACAAGGA
ssc-miR-221-3p	180302	ssc-mir-221	180302	54433	50935	45054	10032	9162	10686	3244.88	3958.35	3554.39	989.72	1035.2	1164.34	AGCUACAUUGUCUGCUGGGUUU	UGAACCUGGCAUACAAUGUAGAUUUCUGUGUUUGUUGGGCAACAGCUACAUUGUCUGCUG
ssc-miR-199b-5p	186486	ssc-mir-199b	186486	63516	42632	35497	15269	13335	16237	3786.34	3313.09	2800.42	1506.38	1506.7	1769.17	CCCAGUGUUUAGACUAUCUGUU	CCGUCUACCCAGUGUUUAGACUAUCUGUUCAGGACUCCCAAAUUGUACAGUAGUCUGCAC
ssc-miR-28-3p	207008	ssc-mir-28	207008	60154	41339	32799	27335	22377	23004	3585.92	3212.61	2587.57	2696.76	2528.33	2506.5	CACUAGAUUGUGAGCUCCUGGA	GGUCCUUGCCCUCAAGGAGCUCACAGUCUAUUGAGUUGCCUUUCUGUCUUCCCCACUAGA
ssc-miR-27a	212722	ssc-mir-27a	212722	32897	59822	53088	24379	21240	21296	1961.07	4648.99	4188.21	2405.13	2399.87	2320.4	UUCACAGUGGCUAAGUUCCGC	UGGCCUGGGGAGCAGGGCUUAGCUGCUUGUGAGCAGGUCCACAGCAAGUCGUGUUCACAG
ssc-miR-99b	221374	ssc-mir-99b	221374	48950	36506	36047	35153	34301	30417	2918.03	2837.02	2843.81	3468.05	3875.6	3314.21	CACCCGUAGAACCGACCUUGCG	GGCACCCACCCGUAGAACCGACCUUGCGGGGCCUUCGCCGCACACAAGCUCGUGUCUGUG
ssc-miR-24-3p	231770	ssc-mir-24-1	231770	28379	58658	69698	27321	23225	24489	1691.74	4558.53	5498.6	2695.38	2624.15	2668.3	UGGCUCAGUUCAGCAGGAACAG	CUCUGCCUCCCGUGCCUACUGAGCUGAAACACAGUUGAUUUGUGCAGACUGGCUCAGUUC
ssc-miR-125b	256834	ssc-mir-125b-1	256834	48198	65085	66587	26994	24112	25858	2873.2	5058	5253.17	2663.12	2724.37	2817.47	UCCCUGAGACCCUAACUUGUGA	CCUCUCAGUCCCUGAGACCCUAACUUGUGAUGUUUACCGUUUAAAUCCACGGGUUAGGCU
ssc-miR-222	256896	ssc-mir-222	256896	85562	44382	48307	27354	27381	23910	5100.55	3449.09	3811.03	2698.63	3093.72	2605.22	AGCUACAUCUGGCUACUGGGUCUC	UGCCCUCAAUGGCUCAGUAGCCAGUGUAGAUCCUGUCAUUUGUAAUCAGUAGCUACAUCU
ssc-miR-378	274345	ssc-mir-378-1	274345	56027	47415	39761	46261	41685	43196	3339.9	3684.79	3136.82	4563.92	4709.91	4706.61	ACUGGACUUGGAGUCAGAAGGC	CCACCCAGGGCUCCUGACUCCAGGUCCUGUGUGUUGCCUGGAAAUAGCACUGGACUUGGA
ssc-miR-199a-5p	278209	ssc-mir-199a-1	278209	49077	77282	88366	21160	20062	22262	2925.6	6005.87	6971.36	2087.56	2266.77	2425.65	CCCAGUGUUCAGACUACCUGUUC	UCCGUCGCCCCAGUGUUCAGACUACCUGUUCAGGACAAUGCCGUUGUACAGUAGUCUGCA
ssc-miR-30d	370556	ssc-mir-30d	370556	95309	56805	53389	58680	52367	54006	5681.59	4414.53	4211.96	5789.12	5916.84	5884.46	UGUAAACAUCCCCGACUGGAAGCU	CUGUUGUUGUAAACAUCCCCGACUGGAAGCUGUAAGACAUAGCUAAGCUUUCAGUCAGAU
ssc-miR-10a-5p	424380	ssc-mir-10a	424380	96747	60366	58145	77339	69371	62412	5767.32	4691.26	4587.17	7629.94	7838.09	6800.37	UACCCUGUAGAUCCGAAUUUGU	UCUGUAUAUACCCUGUAGAUCCGAAUUUGUGUAAGGAAUUUUGUGGUCACAAAUUCGUAU
ssc-miR-99a-5p	506681	ssc-mir-99a	506681	54000	129052	138326	67609	58958	58736	3219.07	10029.1	10912.8	6670.02	6661.55	6399.83	AACCCGUAGAUCCGAUCUUGUG	CCAUUGGCAUAAACCCGUAGAUCCGAUCUUGUGGUGAAGUGGACCGCACAAGCUCGCUUC
ssc-miR-92a	570941	ssc-mir-92a-1	570941	150775	71419	69222	92257	91913	95355	8988.05	5550.23	5461.05	9101.69	10385.1	10389.8	UAUUGCACUUGUCCCGGCCUGU	CUUUCUACACAGGUUGGGAUCGGUUGCAAUGCUGUGUUUCUGUAUGGUAUUGCACUUGUC
ssc-let-7c	593282	ssc-let-7c	593282	124174	115544	114968	87316	77867	73413	7402.31	8979.35	9070.04	8614.23	8798.04	7999.03	UGAGGUAGUAGGUUGUAUGGUU	UGUGUGCAUCCGGGUUGAGGUAGUAGGUUGUAUGGUUUAGAGUUACACCGUGGGAGUUAA
ssc-miR-199a-3p	611397	ssc-mir-199a-1	611397	125036	217973	164574	39068	29681	35065	7453.69	16939.5	12983.5	3854.29	3353.6	3820.66	ACAGUAGUCUGCACAUUGGUUA	UCCGUCGCCCCAGUGUUCAGACUACCUGUUCAGGACAAUGCCGUUGUACAGUAGUCUGCA
ssc-miR-199b-3p	611407	ssc-mir-199a-1	611407	125036	217980	164577	39068	29681	35065	7453.69	16940	12983.8	3854.29	3353.6	3820.66	UACAGUAGUCUGCACAUUGGUU	UCCGUCGCCCCAGUGUUCAGACUACCUGUUCAGGACAAUGCCGUUGUACAGUAGUCUGCA
ssc-miR-7-5p	678414	ssc-mir-7-1	678414	202779	111383	133039	83866	71788	75559	12088.1	8655.98	10495.7	8273.87	8111.18	8232.85	UGGAAGACUAGUGAUUUUGUUGUU	CAGCCCCAUCUGGAAGACUAGUGAUUUUGUUGUUGUCUCACUGCGCUCAACAACAAGUCC
ssc-miR-26a	690618	ssc-mir-26a	690618	125300	154720	161117	95291	77359	76831	7469.43	12023.9	12710.8	9401.01	8740.64	8371.45	UUCAAGUAAUCCAGGAUAGGCU	GGCUGUGGCUGGAUUCAAGUAAUCCAGGAUAGGCUGUUUCCAUCUGUGAGGCCUAUUCUU
ssc-miR-151-3p	752831	ssc-mir-151	752831	140352	134760	113732	131268	119270	113449	8366.71	10472.7	8972.53	12950.4	13476.1	12361.3	CUAGACUGAAGCUCCUUGAGGA	UUUUCCUGCCCUCGAGGAGCUCACAGUCUAGUACGUCUCAUCCCCUACUAGACUGAAGCU
ssc-miR-27b-3p	796080	ssc-mir-27b	796080	202947	217594	169645	69904	56304	79686	12098.1	16910	13383.6	6896.44	6361.68	8682.53	UUCACAGUGGCUAAGUUCUGC	ACGAGGUGCAGAGCUUAGCUGAUUGGUGAACAGUGACUGGUUUCCGCUUUGUUCACAGUG
ssc-miR-10b	956631	ssc-mir-10b	956631	201573	114489	116434	198021	172964	153150	12016.2	8897.36	9185.69	19535.9	19542.9	16687.1	UACCCUGUAGAACCGAAUUUGU	GUCUAUAUAUACCCUGUAGAACCGAAUUUGUGUGGUAUCCACAUAGUCACAGAUUCGAUU
ssc-let-7g	1035938	ssc-let-7g	1035938	265913	243412	209453	117246	92132	107782	15851.7	18916.4	16524.1	11567	10409.8	11743.9	UGAGGUAGUAGUUUGUACAGUU	GGCUGAGGUAGUAGUUUGUACAGUUUGAGGGUCUAUGAUACCACCCGGUACAGGAGAUAA
ssc-let-7a	2492649	ssc-let-7a-1	2492649	604329	462805	455181	334453	316327	319554	36025.5	35966.3	35910.1	32995.7	35741.2	34818.4	UGAGGUAGUAGGUUGUAUAGUU	CCCAGGUUGAGGUAGUAGGUUGUAUAGUUUAGAAUUGUAUCAAGGGAGAUAACUGUACAG
ssc-let-7f-5p	2626997	ssc-let-7f-1	2626997	746049	419717	380381	400542	321701	358607	44473.7	32617.8	30009	39515.8	36348.4	39073.6	UGAGGUAGUAGAUUGUAUAGUU	UGUGGGAUGAGGUAGUAGAUUGUAUAGUUUUAGGGUCAUACCCCAUCUUGGAGAUAACUA
ssc-miR-100	3445418	ssc-mir-100	3445418	891622	500952	519054	528563	505324	499903	53151.7	38930.8	40949.1	52145.8	57095.6	54469.1	AACCCGUAGAUCCGAACUUGUG	AGGCCUGUUGCCACAAACCCGUAGAUCCGAACUUGUGCUGAUAGUGCACACAAGCUUGUG
ssc-miR-143-3p	6059492	ssc-mir-143	6059492	1366186	755900	774847	1169755	1016399	976405	81441.6	58743.8	61129.1	115403	114841	106388	UGAGAUGAAGCACUGUAGCUC	GUCCCCCAGCCGGAGGUGCAGUGCUGCAUCUCUGGUCAGCUGGGAGUCUGAGAUGAAGCA
ssc-let-7i-5p	6566326	ssc-let-7i	6566326	1595511	1161402	1231979	940815	809277	827342	95112.2	90256.8	97193.1	92816.9	91438.6	90146.6	UGAGGUAGUAGUUUGUGCU	CUGGCUGAGGUAGUAGUUUGUGCUGUUGGUCGGGUUGUGACAUUGCCCGCUGUGGAGAUA
ssc-miR-148a-3p	6957417	ssc-mir-148a	6957417	1603914	1243226	1185712	1021742	941745	961078	95613.1	96615.7	93543	100801	106406	104718	UCAGUGCACUACAGAACUUUGU	GAGGCAAAGUUCUGAGACACUCCGACUCUGAAUAUGAUAGAAGUCAGUGCACUACAGAAC
ssc-miR-21-5p	16683905	ssc-mir-21	16683905	4052757	2751347	2969409	2520334	2102181	2287877	241594	213817	234262	248646	237521	249285	UAGCUUAUCAGACUGAUGUUGA	UGUACCACCUUGUCGGGUAGCUUAUCAGACUGAUGUUGACUGUUGAAUCUCAUGGCAACA
Novel miRNA
chr12_27670	16678864	chr12_27670	16678864	4051713	2750425	2968254	2519581	2101617	2287274	148712	142837	153352	151986	144856	154100	uagcuuaucagacugauguugac	uagcuuaucagacugauguugacuguugaaucucauggcaacagcagucgaugggcuguc
chr18_39027	6929550	chr18_39027	6929550	1597702	1239726	1181952	1016972	937156	956042	58641.2	64382.5	61064.5	61345.6	64594.3	64411.3	ucagugcacuacagaacuuugu	aaaguucugagacacuccgacucugaauaugauagaagucagugcacuacagaacuuugu
chr5_13142	6556576	chr5_13142	6556576	1591192	1158195	1231309	939907	808956	827017	58402.2	60148.4	63614.5	56696.9	55758	55718.5	ugagguaguaguuugugcuguu	ugagguaguaguuugugcuguuggucggguugugacauugcccgcuguggagauaacugcgcaagcuacugccuugcu
chr2_5821	5112255	chr2_5821	5112255	1067933	568273	639626	1047692	916119	872612	39196.8	29512	33045.7	63198.7	63144.3	58790.4	ugagaugaagcacuguagcuc	ggugcagugcugcaucucuggucagcugggagucugagaugaagcacuguagcuc
chr2_5822	5112255	chr2_5821	5112255	1067933	568273	639626	1047692	916119	872612	39196.8	29512	33045.7	63198.7	63144.3	58790.4	ugagaugaagcacuguagcuc	ggugcagugcugcaucucuggucagcugggagucugagaugaagcacuguagcuc
chr9_24157	3444351	chr9_24157	3444351	891429	500844	518818	528419	505133	499708	32718.5	26010.3	26804.3	31875.2	34816.7	33666.8	aacccguagauccgaacuugug	aacccguagauccgaacuugugcugauagugcacacaagcuugugucuauagguau
chr3_8180	2433067	chr3_8179	2433067	710228	398692	354516	358506	286123	325002	26067.8	20705.2	18315.8	21625.7	19721.3	21896.3	ugagguaguagauuguauaguu	uugugcucuauucccgaagaagagauugcucuaucagagugagguaguagauuguauaguu
chr3_8179	2433067	chr3_8179	2433067	710228	398692	354516	358506	286123	325002	26067.8	20705.2	18315.8	21625.7	19721.3	21896.3	ugagguaguagauuguauaguu	uugugcucuauucccgaagaagagauugcucuaucagagugagguaguagauuguauaguu
chr9_24155	2416909	chr5_13731	2416909	588461	451204	442336	321914	304942	308052	21598.5	23432.3	22852.9	19418.4	21018.4	20754.4	ugagguaguagguuguauaguu	ugagguaguagguuguauaguuggggcuccgcccggcuguggaauaacuauacaaccuacugucuuucc
chr5_13731	2416909	chr5_13731	2416909	588461	451204	442336	321914	304942	308052	21598.5	23432.3	22852.9	19418.4	21018.4	20754.4	ugagguaguagguuguauaguu	ugagguaguagguuguauaguuggggcuccgcccggcuguggaauaacuauacaaccuacugucuuucc
chr13_31021	1030063	chr13_31021	1030063	264464	242098	208291	116551	91539	107120	9706.74	12572.8	10761.2	7030.57	6309.41	7216.99	ugagguaguaguuuguacaguu	ugagguaguaguuuguacaguuugagggucuaugauaccacccgguacaggagauaacuguacaggccacugccuugcc
chr15_34954	956599	chr15_34954	956599	201569	114481	116432	198010	172959	153148	7398.28	5945.33	6015.36	11944.3	11921.4	10318	uacccuguagaaccgaauuugu	uacccuguagaaccgaauuugugugguauccacauagucacagauucgauucuaggggaau
chr10_24996	685010	chr10_24996	685010	204234	112101	134120	85074	72867	76614	7496.09	5821.73	6929.19	5131.82	5022.42	5161.71	uggaagacuagugauuuuguuguu	uggaagacuagugauuuuguuguuuuuagauaacuaaaucgacaacaaaucacagucugccaua
chr1_3429	685010	chr10_24996	685010	204234	112101	134120	85074	72867	76614	7496.09	5821.73	6929.19	5131.82	5022.42	5161.71	uggaagacuagugauuuuguuguu	uggaagacuagugauuuuguuguuuuuagauaacuaaaucgacaacaaaucacagucugccaua
chr2_6897	685010	chr10_24996	685010	204234	112101	134120	85074	72867	76614	7496.09	5821.73	6929.19	5131.82	5022.42	5161.71	uggaagacuagugauuuuguuguu	uggaagacuagugauuuuguuguuuuuagauaacuaaaucgacaacaaaucacagucugccaua
chr1_3430	685010	chr10_24996	685010	204234	112101	134120	85074	72867	76614	7496.09	5821.73	6929.19	5131.82	5022.42	5161.71	uggaagacuagugauuuuguuguu	uggaagacuagugauuuuguuguuuuuagauaacuaaaucgacaacaaaucacagucugccaua
chr5_14109	678003	chr5_14109	678003	123060	152130	157765	93813	75816	75419	4516.73	7900.55	8150.79	5658.97	5225.69	5081.2	uucaaguaauccaggauaggcu	uucaaguaauccaggauaggcuguuuccaucugugaggccuauucuugauuacuuguuuc
chr10_25574	676556	chr10_25574	676556	173154	187684	146502	57198	45586	66432	6355.35	9746.97	7568.9	3450.29	3142.06	4475.72	uucacaguggcuaaguucugc	agagcuuagcugauuggugaacagugacugguuuccgcuuuguucacaguggcuaaguucugc
chr13_30506	591583	chr13_30506	591583	123826	115269	114674	87019	77604	73191	4544.84	5986.25	5924.53	5249.15	5348.92	4931.09	ugagguaguagguuguaugguu	ugagguaguagguuguaugguuuagaguuacaccgugggaguuaacuguacaaccuucuagcuuucc
chr4_10303	581360	chr4_10303	581360	110668	110844	90772	96229	87977	84870	4061.9	5756.45	4689.66	5804.71	6063.89	5717.94	cuagacugaagcuccuugagg	ucgaggagcucacagucuaguacgucucauccccuacuagacugaagcuccuugagg
chr13_30504	477389	chr13_30504	477389	51043	122345	130966	63140	55032	54863	1873.45	6353.73	6766.24	3808.72	3793.13	3696.28	aacccguagauccgaucuugu	aacccguagauccgaucuuguggugaaguggaccgcacaagcucgcuucuaugggucugu
chr6_16939	451120	chr6_16939	451120	170726	108291	53861	47256	35528	35458	6266.23	5623.86	2782.68	2850.57	2448.8	2388.91	ugagguaguaguuugugcugga	ugagguaguaguuugugcuggaggcucuucagcacugugugugugugucugugugucuguguugugucugugugucuuaug
chr9_24590	443675	chr1_4048	443675	92375	155565	117777	29681	22155	26122	3390.48	8078.94	6084.84	1790.41	1527.05	1759.91	acaguagucugcacauugguu	cccaguguuuagacuaucuguucaggacucccaaauuguacaguagucugcacauugguu
chr2_6820	443675	chr1_4048	443675	92375	155565	117777	29681	22155	26122	3390.48	8078.94	6084.84	1790.41	1527.05	1759.91	acaguagucugcacauugguu	cccaguguuuagacuaucuguucaggacucccaaauuguacaguagucugcacauugguu
chr1_4048	443675	chr1_4048	443675	92375	155565	117777	29681	22155	26122	3390.48	8078.94	6084.84	1790.41	1527.05	1759.91	acaguagucugcacauugguu	cccaguguuuagacuaucuguucaggacucccaaauuguacaguagucugcacauugguu
chr12_28499	421083	chr12_28499	421083	95958	59898	57703	76757	68834	61933	3521.99	3110.67	2981.17	4630.12	4744.44	4172.61	uacccuguagauccgaauuugu	uacccuguagauccgaauuuguguaaggaauuuuguggucacaaauucguaucuaggggaau
chr11_26267	412573	chr11_26267	412573	117048	53097	48893	64910	63345	65280	4296.06	2757.48	2526.01	3915.49	4366.11	4398.1	uauugcacuugucccggccugu	agguugggaucgguugcaaugcuguguuucuguaugguauugcacuugucccggccugu
chrX_40906	412573	chr11_26267	412573	117048	53097	48893	64910	63345	65280	4296.06	2757.48	2526.01	3915.49	4366.11	4398.1	uauugcacuugucccggccugu	agguugggaucgguugcaaugcuguguuucuguaugguauugcacuugucccggccugu
chr4_10338	370552	chr4_10338	370552	95306	56805	53389	58679	52367	54006	3498.06	2950.05	2758.3	3539.62	3609.44	3638.54	uguaaacauccccgacuggaagcu	uguaaacauccccgacuggaagcuguaagacauagcuaagcuuucagucagauguuugcugc
chr9_22827	305343	chr9_22827	305343	86847	90490	92823	12265	10708	12210	3187.58	4699.4	4795.62	739.85	738.06	822.62	aaauggauuuuuggagcaggga	ccugaucuuaucaguuuaacaucugaaauguccucuauccgaggacaaucauuaaauggauuuuuggagcaggga
chrX_40872	305343	chr9_22827	305343	86847	90490	92823	12265	10708	12210	3187.58	4699.4	4795.62	739.85	738.06	822.62	aaauggauuuuuggagcaggga	ccugaucuuaucaguuuaacaucugaaauguccucuauccgaggacaaucauuaaauggauuuuuggagcaggga
chr9_24153	252634	chr13_30508	252634	47594	64538	65148	26510	23581	25263	1746.86	3351.64	3365.81	1599.13	1625.34	1702.04	ucccugagacccuaacuugug	ucccugagacccuaacuugugagguauuuuaguaacaucacaagucaggcucuugggacc
chr13_30508	252634	chr13_30508	252634	47594	64538	65148	26510	23581	25263	1746.86	3351.64	3365.81	1599.13	1625.34	1702.04	ucccugagacccuaacuugug	ucccugagacccuaacuugugagguauuuuaguaacaucacaagucaggcucuugggacc
chrX_40610	239933	chrX_40610	239933	80223	41474	45320	25349	25354	22213	2944.46	2153.86	2341.42	1529.1	1747.55	1496.55	agcuacaucuggcuacugggucucu	cucaguagccaguguagauccugucauuuguaaucaguagcuacaucuggcuacugggucucu
chr12_28771	229373	chr12_28771	229373	58967	20335	21680	28895	56488	43008	2164.29	1056.05	1120.08	1743	3893.49	2897.57	acagcucgguccucuuug	acagcucgguccucuuugggaguucccgucgugacucagugguuaaca
chr2_4947	213818	chr10_25572	213818	25712	54138	64948	25025	21448	22547	943.72	2811.54	3355.48	1509.55	1478.32	1519.06	uggcucaguucagcaggaacag	gugccuacugagcugauaucaguucucauuuuacacacuggcucaguucagcaggaacag
chr10_25572	213818	chr10_25572	213818	25712	54138	64948	25025	21448	22547	943.72	2811.54	3355.48	1509.55	1478.32	1519.06	uggcucaguucagcaggaacag	gugccuacugagcugauaucaguucucauuuuacacacuggcucaguucagcaggaacag
chr7_19983	191114	chr7_19983	191114	47102	16607	18159	24449	47900	36897	1728.81	862.45	938.17	1474.81	3301.55	2485.86	gcagcucgguccucuuuu	gcagcucgguccucuuuuggaguucccaucauggcucgaugguuaaugaaccuggcuaguauccaugaggaugcggguuccauu
chr2_5827	187181	chr2_5827	187181	39278	36871	29308	28126	25710	27888	1441.64	1914.82	1514.17	1696.61	1772.08	1878.9	acuggacuuggagucagaaggc	cuccugacuccagguccuguguguugccuggaaauagcacuggacuuggagucagaaggc
chrX_40608	180292	chrX_40607	180292	54430	50934	45048	10032	9162	10686	1997.77	2645.15	2327.37	605.15	631.5	719.95	agcuacauugucugcuggguuuc	agcuacauugucugcuggguuucaggcuaccuggaagcaugugcuucgcagcuguuuucauccccgcuucaacuguacugu
chrX_40607	180292	chrX_40607	180292	54430	50934	45048	10032	9162	10686	1997.77	2645.15	2327.37	605.15	631.5	719.95	agcuacauugucugcuggguuuc	agcuacauugucugcuggguuucaggcuaccuggaagcaugugcuucgcagcuguuuucauccccgcuucaacuguacugu
chrAEMK02000452.1_41503	179248	chrAEMK02000452.1_41503	179248	37982	40919	43244	18198	19075	19830	1394.07	2125.04	2234.16	1097.74	1314.76	1336	uauacaaggacaagcucucugu	agcgagguugcccuuuguauauucggguuuugagguggaauauacaaggacaagcucucugu
chr12_28498	173557	chr12_28498	173557	44744	34292	26836	24611	19908	23166	1642.26	1780.88	1386.46	1484.58	1372.18	1560.76	ucagugcaugacagaacuuggg	agguucugugauacacuccgacucgggcucuggagcagucagugcaugacagaacuuggg
chr13_30141	170529	chr13_30141	170529	51539	35012	27845	21233	17015	17885	1891.66	1818.27	1438.59	1280.81	1172.77	1204.96	cacuagauugugagcuccugga	aaggagcucacagucuauugaguugccuuucugucuuccccacuagauugugagcuccugga
chr3_9130	165408	chr3_9130	165408	43059	27531	28468	24178	20728	21444	1580.41	1429.76	1470.77	1458.46	1428.7	1444.74	cauugcacuugucucggucuga	aggcggagacuugggcaauugcuggacgcugcccugggcauugcacuugucucggucuga
chr6_17245	153499	chr6_17245	153499	39366	26882	26566	21286	18988	20411	1444.87	1396.06	1372.51	1284.01	1308.76	1375.15	ugagguaggagguuguauaguu	ugagguaggagguuguauaguugaggaggacacccacggagaucacuauacggccuccuagcuuucc
chr6_17246	153499	chr6_17245	153499	39366	26882	26566	21286	18988	20411	1444.87	1396.06	1372.51	1284.01	1308.76	1375.15	ugagguaggagguuguauaguu	ugagguaggagguuguauaguugaggaggacacccacggagaucacuauacggccuccuagcuuucc
chr17_38117	152232	chr17_38117	152232	30130	24086	20766	27175	26904	23171	1105.87	1250.85	1072.86	1639.25	1854.38	1561.1	ccgggugcuguaggcuug	ugccuccaucgcagaaaggccacgaauuuuuggucccgggugcuguaggcuug
chr2_6301	148639	chr18_39365	148639	37547	18351	21759	23846	24500	22636	1378.1	953.02	1124.16	1438.43	1688.68	1525.05	cuuuuugcggucugggcuugc	cuuuuugcggucugggcuugcuguuccucucuacaguagucaggaagcccuuaccccaaaaagu
chr18_39365	148639	chr18_39365	148639	37547	18351	21759	23846	24500	22636	1378.1	953.02	1124.16	1438.43	1688.68	1525.05	cuuuuugcggucugggcuugc	cuuuuugcggucugggcuugcuguuccucucuacaguagucaggaagcccuuaccccaaaaagu
chr2_6302	148639	chr18_39365	148639	37547	18351	21759	23846	24500	22636	1378.1	953.02	1124.16	1438.43	1688.68	1525.05	cuuuuugcggucugggcuugc	cuuuuugcggucugggcuugcuguuccucucuacaguagucaggaagcccuuaccccaaaaagu
chr2_4945	145119	chr2_4945	145119	24513	42115	33396	16980	14294	13821	899.71	2187.15	1725.37	1024.26	985.23	931.16	uucacaguggcuaaguuccg	agggcuuagcugcuugugagcagguccacagcaagucguguucacaguggcuaaguuccg
chr12_27812	137727	chr12_27812	137727	25526	18228	20326	26254	25763	21630	936.89	946.63	1050.12	1583.69	1775.74	1457.28	ugaggggcagagagcgagacuuu	ugaggggcagagagcgagacuuuucuauuuuccaaaagcucggucugaggccccucagu
chrX_39894	95192	chrX_39894	95192	25229	10224	10460	18388	15656	15235	925.99	530.96	540.41	1109.2	1079.1	1026.43	caugccuugaguguaggaccgu	caugccuugaguguaggaccguuggcaucugaauacccucccacacccaaggcuugca
chr6_17243	93764	chr6_17243	93764	13645	25384	23352	11203	10301	9879	500.82	1318.26	1206.46	675.79	710.01	665.58	ucccugagacccuuuaaccugug	ucccugagacccuuuaaccugugaggacauccagggucacaggugagguucuugggagc
chr5_12981	85679	chr5_12981	85679	27986	14460	12528	10348	9762	10595	1027.18	750.95	647.25	624.21	672.85	713.82	ucagugcaucacagaacuuugu	gaaguucuguuauacacucaggcuguggcucucugaaagucagugcaucacagaacuuugu
chr2_5824	82995	chr2_5824	82995	25278	19970	11366	10685	6845	8851	927.79	1037.1	587.21	644.54	471.8	596.32	guccaguuuucccaggaaucccu	guccaguuuucccaggaaucccuuagaugcugagauggggauuccuggaaauacuguucuu
chr12_28928	82115	chr12_28928	82115	10316	15500	20722	13425	12593	9559	378.63	804.96	1070.58	809.82	867.98	644.02	aagcugccaguugaagaacugu	aguucuucaguggcaagcuuuauguccugacccagcuaaagcugccaguugaagaacugu
chrX_40659	78875	chrX_40659	78875	14769	19163	21934	8941	6981	7087	542.07	995.19	1133.2	539.34	481.17	477.47	ugagguaguaaguuguauuguu	ugagguaguaaguuguauuguugugggguagggauuuuaggccccaauuagaagauaacuauacaacuuacuacuuuccc
chrX_40915	77147	chrX_40915	77147	24764	14477	14577	9197	6777	7355	908.92	751.83	753.11	554.78	467.11	495.53	uuuugcaauauguuccugaau	uuuugcaauauguuccugaauauguaauauaaguauauugggaacauuuugcaucca
chr13_30949	75367	chr13_30949	75367	13559	22591	21422	6266	5360	6169	497.66	1173.22	1106.75	377.98	369.44	415.62	caacggaaucccaaaagcagcug	caacggaaucccaaaagcagcuguugucuccagagcauuccagcugcacuuggauuucguuccc
chr10_25576	73334	chr10_25576	73334	19205	20018	15933	6920	5170	6088	704.89	1039.59	823.16	417.43	356.35	410.17	aucacauugccagggauuaccacg	uggguuccuggcaugcugauuugugacuuaagauuaaaaucacauugccagggauuaccacg
chr16_36935	70904	chr16_36935	70904	19733	19280	14433	5536	4998	6924	724.27	1001.27	745.67	333.94	344.49	466.49	agcagcauuguacagggcuauga	ucggcuucuuuacagugcugccuuguugcauauggaucaagcagcauuguacagggcuauga
chr17_38406	70904	chr16_36935	70904	19733	19280	14433	5536	4998	6924	724.27	1001.27	745.67	333.94	344.49	466.49	agcagcauuguacagggcuauga	ucggcuucuuuacagugcugccuuguugcauauggaucaagcagcauuguacagggcuauga
chr15_35586	65644	chr13_29275	65644	10153	11335	15533	9724	9998	8901	372.65	588.66	802.5	586.57	689.12	599.69	ucacagugaaccggucucuuu	gggggccgaggcacuguccgagagugaguagcaggucucacagugaaccggucucuuu
chr13_29275	65644	chr13_29275	65644	10153	11335	15533	9724	9998	8901	372.65	588.66	802.5	586.57	689.12	599.69	ucacagugaaccggucucuuu	gggggccgaggcacuguccgagagugaguagcaggucucacagugaaccggucucuuu
chr18_38889	65129	chr18_38889	65129	10145	18832	20580	5127	5169	5276	372.36	978	1063.25	309.27	356.28	355.46	cuagcaccaucugaaaucgguu	acugauuucuuuugguguucagagucaauauaauuuucuagcaccaucugaaaucgguu
chr14_32626	51846	chr14_32625	51846	11120	15513	12242	3973	3666	5332	408.14	805.63	632.47	239.66	252.68	359.23	uggagagaaaggcaguuccuga	gggcagcgggccuggcuugagcggggggugagggauuggagagaaaggcaguuccuga
chr14_32625	51846	chr14_32625	51846	11120	15513	12242	3973	3666	5332	408.14	805.63	632.47	239.66	252.68	359.23	uggagagaaaggcaguuccuga	gggcagcgggccuggcuugagcggggggugagggauuggagagaaaggcaguuccuga
chr2_4943	51558	chr2_4943	51558	14910	12972	10079	4788	3954	4855	547.25	673.67	520.72	288.82	272.53	327.1	aucacauugccagggauuucc	gggguuccuggggaugggauuugcugccugucacaaaucacauugccagggauuucc
chrX_40919	51238	chrX_40919	51238	9682	10804	13792	6462	5065	5433	355.36	561.08	712.55	389.8	349.11	366.04	uuuugcgauguguuccuaauac	uuuugcgauguguuccuaauacguaaucuaaguguauugggaacauuuugcauucgu
chr1_2421	50604	chr1_2421	50604	14944	8600	7927	6019	6415	6699	548.5	446.62	409.54	363.08	442.16	451.33	uguaaacauccucgacuggaagcu	uguaaacauccucgacuggaagcugugaggcugaagacgggcuuucagucggauguuugcagc
chr5_13812	45267	chr5_13812	45267	10852	8128	7139	6842	6266	6040	398.31	422.11	368.83	412.72	431.89	406.93	augcggaaccugcggauacgg	auguccgcggguucccuaucccggguugguugaguucgcggaugcggaaccugcggauacgg
chr15_35324	41792	chr15_35324	41792	8178	12842	11428	3451	2704	3189	300.16	666.92	590.42	208.17	186.38	214.85	uucaaguaauucaggauagguu	uucaaguaauucaggauagguugugugcuguccagccuguucuccauuacuuggcuc
chr2_7061	40780	chr2_7061	40780	10661	7646	6682	5503	5218	5070	391.3	397.08	345.22	331.95	359.66	341.58	cuuggcaccuaguaagcacuca	cuuggcaccuaguaagcacucaguauauacuuguugagugccugcuaugugccagg
chrAEMK02000452.1_41605	40445	chrAEMK02000452.1_41605	40445	10420	7345	7615	5824	4307	4934	382.45	381.45	393.42	351.31	296.86	332.42	ugaaauguuuaggaccacuaga	cagugguucuuaacaguucaacaguucuguagcgcaauugugaaauguuuaggaccacuaga
chr13_30524	37978	chr13_30524	37978	9557	10876	9670	2941	2358	2576	350.77	564.82	499.59	177.41	162.53	173.55	uuaaugcuaauugugauagggguu	uuaaugcuaauugugauagggguuuuuaccuccgucugacuccuacauguuagcauuaaca
chr17_38137	36489	chr17_38137	36489	10083	5189	4489	6726	4343	5659	370.08	269.48	231.92	405.72	299.35	381.26	uggaauguaaagaaguauguau	acauacuucuuuaugugcccauauggaccugcuaagcuauggaauguaaagaaguauguau
chr6_17900	36489	chr17_38137	36489	10083	5189	4489	6726	4343	5659	370.08	269.48	231.92	405.72	299.35	381.26	uggaauguaaagaaguauguau	acauacuucuuuaugugcccauauggaccugcuaagcuauggaauguaaagaaguauguau
chr14_34398	34674	chr14_34398	34674	6340	5677	6350	5420	5403	5484	232.7	294.82	328.07	326.94	372.41	369.47	acucggcguggcgucggucgugg	ucgaccggaccucgaccggcucgucuauguugccaaucgacucggcguggcgucggucgugg
chr16_37459	34261	chr16_37459	34261	5430	10166	8847	3632	3024	3162	199.3	527.95	457.07	219.09	208.43	213.03	ugagaacugaauuccauggguu	ugagaacugaauuccauggguugugucauugucagaccugugaaguuuaguucuucag
chr1_2419	31548	chr1_2419	31548	7276	9666	9312	1772	1593	1929	267.05	501.98	481.1	106.89	109.8	129.96	uguaaacauccuacacucucagc	uguaaacauccuacacucucagcuguggaaaguaagaaagcugggagaaggcuguuuacucu
chr7_19851	31095	chr7_19851	31095	11551	5473	4560	3584	2805	3122	423.96	284.23	235.59	216.19	193.34	210.34	ucggauccgucugagcuuggcu	cugaagcucagagggcucugauucagaaagaucaucggauccgucugagcuuggcu
chr3_9134	31007	chr3_9133	31007	7911	5876	5253	3854	3897	4216	290.36	305.16	271.39	232.48	268.6	284.04	ccgcacuguggguacuugcugc	ccgcacuguggguacuugcugcuccagcagggcacgcacagcguccug
chr3_9133	31007	chr3_9133	31007	7911	5876	5253	3854	3897	4216	290.36	305.16	271.39	232.48	268.6	284.04	ccgcacuguggguacuugcugc	ccgcacuguggguacuugcugcuccagcagggcacgcacagcguccug
chrX_40917	29104	chrX_40917	29104	6438	5408	6900	3996	3185	3177	236.3	280.85	356.48	241.05	219.53	214.04	uuuugcgauguguuccuaau	uuuugcgauguguuccuaauaugcaguauaaauauauugggagcauuuugcaugcau
chr16_36932	29014	chr16_36932	29014	4478	7545	9109	2747	2597	2538	164.36	391.83	470.61	165.7	179	170.99	uugugcuugaucuaaccaugu	uugugcuugaucuaaccaugugguggaacgauggaaacggaacaugguucugucaagcaccgcg
chr8_21176	29014	chr16_36932	29014	4478	7545	9109	2747	2597	2538	164.36	391.83	470.61	165.7	179	170.99	uugugcuugaucuaaccaugu	uugugcuugaucuaaccaugugguggaacgauggaaacggaacaugguucugucaagcaccgcg
chr8_21175	29014	chr16_36932	29014	4478	7545	9109	2747	2597	2538	164.36	391.83	470.61	165.7	179	170.99	uugugcuugaucuaaccaugu	uugugcuugaucuaaccaugugguggaacgauggaaacggaacaugguucugucaagcaccgcg
chr6_18282	26966	chr6_18282	26966	5399	5347	6869	2934	3106	3311	198.16	277.68	354.88	176.98	214.08	223.07	uguaaacauccuugacuggaagcu	uguaaacauccuugacuggaagcugugaggcguucccaggagcuuucagucggauguuuacagc
chr1_2424	26588	chr1_2424	26588	5564	4208	3500	8116	2679	2521	204.22	218.53	180.82	489.57	184.65	169.85	aguggcuaggauucggcg	ccaaaguaaggucccugguagucuaguggcuaggauucggcg
chr6_16265	24611	chr1_3552	24611	5237	4663	5404	2751	3297	3259	192.22	242.16	279.19	165.95	227.25	219.57	uacaguacugugauaacuga	gguuaucaugguaccgaugcuguauaucugaaagguacaguacugugauaacuga
chr1_3552	24611	chr1_3552	24611	5237	4663	5404	2751	3297	3259	192.22	242.16	279.19	165.95	227.25	219.57	uacaguacugugauaacuga	gguuaucaugguaccgaugcuguauaucugaaagguacaguacugugauaacuga
chr14_33831	24535	chr14_33831	24535	4915	4275	4683	3583	3761	3318	180.4	222.01	241.94	216.13	259.23	223.54	acucuuucccuguugcacuacu	acucuuucccuguugcacuacugugggccacugggaagcagugcaaugaugaaagggc
chr6_17253	24455	chr6_17253	24455	2795	2077	2265	5442	6285	5591	102.59	107.86	117.02	328.27	433.2	376.68	ucagaucccagacgagccccca	ucagaucccagacgagcccccaaaagaugaugccggaaagauguuacuggaauccggguucuuguucuuggacuucgc
chr11_26266	24350	chr11_26266	24350	4886	6382	5648	2423	2169	2842	179.33	331.44	291.8	146.16	149.5	191.47	uaaagugcuuauagugcagguag	uaaagugcuuauagugcagguaguguuuaguuaucuacugcauuaugagcacuuaaagu
chr14_33398	23030	chr14_33398	23030	4752	5901	6131	2231	1947	2068	174.41	306.46	316.75	134.58	134.2	139.33	aaaagcuggguugagagggcga	gccuucucuucccgguucuucccggagucgggaaaagcuggguugagagggcga
chrAEMK02000452.1_41462	21554	chrAEMK02000452.1_41462	21554	4620	4487	4103	2984	2686	2674	169.57	233.02	211.98	180	185.13	180.16	ugguagacuguggaacguagg	ugguagacuguggaacguaggcguugugacuuuugaccuauguaacaugguccacuaac
chr4_11546	21091	chr4_11546	21091	6248	3526	4516	1999	2500	2302	229.32	183.12	233.32	120.58	172.31	155.09	ccagaaacagggacgagc	ucguccuagguccuggaugugacccagaaacagggacgagc
chr17_38660	20898	chr17_38659	20898	5023	4570	4443	2247	2224	2391	184.36	237.33	229.54	135.54	153.29	161.09	aggguugggcggaggcuuucc	aggguugggcggaggcuuuccugaaggcucugaggagagcugcgcccacaggcugugu
chr17_38659	20898	chr17_38659	20898	5023	4570	4443	2247	2224	2391	184.36	237.33	229.54	135.54	153.29	161.09	aggguugggcggaggcuuucc	aggguugggcggaggcuuuccugaaggcucugaggagagcugcgcccacaggcugugu
chr4_10675	20563	chr4_10675	20563	2021	3995	4345	3676	3724	2802	74.18	207.47	224.48	221.74	256.68	188.78	aucccacuucuaacaccaua	uggugucuuggcagggaagacagauuagacuugcugaccaaaacaccugcaguggucucccaauguaucccacuucuaacaccaua
chr13_31958	20363	chr13_31958	20363	1991	3939	4316	3640	3704	2773	73.08	204.56	222.98	219.57	255.3	186.83	aaucccacuucugauacca	gugccagugugagggucagggggagcgacacagaaugcucugaaucccacuucugauacca
chr1_2360	20343	chr1_2360	20343	1985	3943	4305	3633	3687	2790	72.86	204.77	222.41	219.15	254.13	187.97	aucucacuucugacacca	ggagggggcuggggcaggcagagaccacacagguugcuuugcaucucacuucugacacca
chrAEMK02000695.1_42849	20219	chrAEMK02000489.1_42483	20219	4284	3808	3831	2931	2864	2501	157.24	197.76	197.93	176.8	197.4	168.5	ugugugugugggcgccggacgcc	uuguccgugccccacccacucacccgugugugugugugugugugggcgccggacgcc
chrAEMK02000489.1_42483	20219	chrAEMK02000489.1_42483	20219	4284	3808	3831	2931	2864	2501	157.24	197.76	197.93	176.8	197.4	168.5	ugugugugugggcgccggacgcc	uuguccgugccccacccacucacccgugugugugugugugugugggcgccggacgcc
chrX_40758	19745	chrX_40758	19745	3999	3587	3912	2863	2797	2587	146.78	186.28	202.11	172.7	192.79	174.29	cccccaggugugauucugauuugc	uuaucagaaucuccagggguacuuauaauuugaaaaagucccccaggugugauucugauuugc
chr11_26260	18932	chr11_26260	18932	3363	5188	4584	1879	1736	2182	123.43	269.43	236.83	113.34	119.66	147.01	caaagugcuuacagugcagguagu	caaagugcuuacagugcagguagugauaaugugcaucuacugcagugaaggcacuuguagca
chr12_28813	18468	chr12_28813	18468	3854	3535	3382	2746	2471	2480	141.46	183.58	174.73	165.64	170.32	167.08	ugggucuuugcgggcgagauga	ugggucuuugcgggcgagaugaggguguugguucaacuggccuacaaagucccagu
chr6_16228	18413	chr6_16228	18413	3139	4915	4894	1982	1622	1861	115.21	255.25	252.84	119.56	111.8	125.38	caaagaauucuccuuuugggcu	caaagaauucuccuuuugggcuuuaugauuuuauuuuaagcccaaaggugaauuuuuu
chr13_29296	18236	chr13_29296	18236	3477	3866	4720	2102	2129	1942	127.62	200.77	243.85	126.8	146.74	130.84	uucaaguaacccaggauaggcu	uucaaguaacccaggauaggcugugcaggucccaaggggccuauucuugguuacuugcacg
chr1_1784	18183	chr1_1784	18183	3177	4781	4902	1893	1700	1730	116.61	248.29	253.26	114.19	117.17	116.56	uaugugccuuuggacuacaucgu	uaugugccuuuggacuacaucguggaagccagcaccaugcaguccaugggcauauacacu
chr8_21088	18040	chr6_16895	18040	3037	6085	7504	583	412	419	111.47	316.01	387.69	35.17	28.4	28.23	cccugggcucugccuccc	cucccugggcucugccucccuucccuuccuugcuuagcaacugcccuuugaaguccagggaaggucagagaggcugaagcuuauucccua
chr7_20327	18040	chr6_16895	18040	3037	6085	7504	583	412	419	111.47	316.01	387.69	35.17	28.4	28.23	cccugggcucugccuccc	cucccugggcucugccucccuucccuuccuugcuuagcaacugcccuuugaaguccagggaaggucagagaggcugaagcuuauucccua
chr7_20328	18040	chr6_16895	18040	3037	6085	7504	583	412	419	111.47	316.01	387.69	35.17	28.4	28.23	cccugggcucugccuccc	cucccugggcucugccucccuucccuuccuugcuuagcaacugcccuuugaaguccagggaaggucagagaggcugaagcuuauucccua
chr6_16895	18040	chr6_16895	18040	3037	6085	7504	583	412	419	111.47	316.01	387.69	35.17	28.4	28.23	cucccugggcucugccuccc	cucccugggcucugccucccuucccuuccuugcuuagcaacugcccuuugaaguccagggaaggucagagaggcugaagcuuauucccua
chr6_16896	18040	chr6_16895	18040	3037	6085	7504	583	412	419	111.47	316.01	387.69	35.17	28.4	28.23	cucccugggcucugccuccc	cucccugggcucugccucccuucccuuccuugcuuagcaacugcccuuugaaguccagggaaggucagagaggcugaagcuuauucccua
chrX_40923	15971	chrX_40923	15971	4349	3550	3202	1710	1477	1683	159.62	184.36	165.43	103.15	101.8	113.39	uagcagcgggaacaguacug	uagcagcgggaacaguacugcagugggcgaucgguacucugggguauuguuucugcugcccgg
chr14_33180	15192	chr14_33180	15192	2196	2476	2048	6024	1253	1195	80.6	128.59	105.81	363.38	86.36	80.51	uagugguuaggauucggc	uagugguuaggauucggcgauuucacugauguggccuggguucaaucccuggucugggaacugagaucccccuucaagccacugca
chrX_40904	14826	chrX_40904	14826	1769	3226	4391	1770	1878	1792	64.93	167.54	226.86	106.77	129.44	120.73	aauugcacgguauccaucugua	cggguggaucacgaugcaauuuugauuaguaucauaggagaaaaauugcacgguauccaucugua
chr6_16698	14451	chr6_16698	14451	4957	3263	2062	1375	1206	1588	181.94	169.46	106.53	82.94	83.12	106.99	accacaggguagaaccacggac	cagugguuuuacccuaugguagguuacgucaugcuguucuaccacaggguagaaccacggac
chr3_9131	14280	chr3_9131	14280	3236	3778	2970	1480	1305	1511	118.77	196.2	153.44	89.28	89.95	101.8	caaagugcuguucgugcagguag	caaagugcuguucgugcagguagugugauaaccuaaccuacugcugagcuagcacuucccga
chr4_12150	13808	chr4_12150	13808	3029	2293	1957	2116	2496	1917	111.17	119.08	101.11	127.64	172.04	129.15	uauugcacucgucccggccucc	agggacgggacgcggugcaguguuguucuuuccccugccaauauugcacucgucccggccucc
chrAEMK02000452.1_41529	12906	chrAEMK02000452.1_41529	12906	3062	1597	1689	2734	2115	1709	112.39	82.94	87.26	164.92	145.78	115.14	gaauguugcucggugaaccccu	agguuacccgagcaacuuugcaucuggacgacgaauguugcucggugaaccccu
chr13_29618	12852	chr13_29618	12852	2824	1882	2015	1786	1930	2415	103.65	97.74	104.1	107.73	133.03	162.71	cagcaauaauggaucugagc	cagcaauaauggaucugagcugcaucuacaaccuacacggcagcaacuccagauucuuaacccacugagc
chrAEMK02000449.1_41880	12851	chr13_29618	12851	2824	1882	2015	1786	1930	2414	103.65	97.74	104.1	107.73	133.03	162.64	cagcaauaauggaucuga	cagcaauaauggaucugagcugcaucuacaaccuacacggcagcaacuccagauucuuaacccacugagc
chr14_34263	12656	chr14_33335	12656	2792	1854	1975	1744	1900	2391	102.48	96.28	102.04	105.2	130.96	161.09	cagcagugauggaucugagc	aauuggagcuguagcugcuggccucugccauagccacagcagugauggaucugagc
chr14_33335	12656	chr14_33335	12656	2792	1854	1975	1744	1900	2391	102.48	96.28	102.04	105.2	130.96	161.09	cagcagugauggaucugagc	aauuggagcuguagcugcuggccucugccauagccacagcagugauggaucugagc
chr14_34264	12656	chr14_33335	12656	2792	1854	1975	1744	1900	2391	102.48	96.28	102.04	105.2	130.96	161.09	cagcagugauggaucugagc	aauuggagcuguagcugcuggccucugccauagccacagcagugauggaucugagc
chr8_22472	12630	chr8_22472	12630	2785	1848	1970	1743	1901	2383	102.22	95.97	101.78	105.14	131.03	160.55	cagcaaugauggaccugagc	aaucagagcuguagcuacuggccuacaccacagccacagcaaugauggaccugagc
chr13_31928	12605	chr13_31928	12605	2778	1845	1968	1737	1893	2384	101.96	95.82	101.67	104.78	130.48	160.62	cagaaaugauggaucugagc	uaggggucgaaucacagccacagcugaggcuuaugccgcagcuacagaaaugauggaucugagc
chr3_8365	12600	chr3_8365	12600	2780	1842	1962	1740	1898	2378	102.04	95.66	101.37	104.96	130.82	160.21	cagcaaugauggauuugagc	gucaaaucagagcugcagcugccagccuacaccacagccacagcaaugauggauuugagc
chr10_25503	12483	chr10_25503	12483	2176	3165	3195	1563	1183	1201	79.87	164.37	165.07	94.28	81.54	80.91	aacauucaacgcugucggugagu	aacauucaacgcugucggugaguuuggaauucaaaucaaaaccaucgaccguugauuguacc
chr1_1850	12483	chr10_25503	12483	2176	3165	3195	1563	1183	1201	79.87	164.37	165.07	94.28	81.54	80.91	aacauucaacgcugucggugagu	aacauucaacgcugucggugaguuuggaauucaaaucaaaaccaucgaccguugauuguacc
chr9_23765	12008	chr9_23765	12008	1483	1559	1538	2639	2513	2276	54.43	80.96	79.46	159.19	173.21	153.34	ucccccgcaccuccacca	gcuggaaggagcgggcccugccucccccgcaccuccacca
chr1_2024	11785	chr1_2024	11785	2427	2313	2338	1418	1659	1630	89.08	120.12	120.79	85.54	114.35	109.82	ucagcuucgggccuagauccugg	ucagcuucgggccuagauccuggccuuugggauucagcuugauggucgggcucucccggagcagagg
chr15_35411	11669	chr15_35411	11669	3160	2137	2456	1199	1382	1335	115.98	110.98	126.89	72.33	95.26	89.94	cggaaacggggacgagcu	cuguccuuccucuaggcagacagcagcccgguuacuggacucugggguucuggucuaccucggaaacggggacgagcu
chr1_1852	11091	chr10_25501	11091	2423	3050	2839	1059	841	879	88.93	158.4	146.67	63.88	57.97	59.22	aacauucauugcugucggugggu	aacauucauugcugucgguggguugaacuguguagacaagcucacugaacaaugaaugcaa
chr10_25501	11091	chr10_25501	11091	2423	3050	2839	1059	841	879	88.93	158.4	146.67	63.88	57.97	59.22	aacauucauugcugucggugggu	aacauucauugcugucgguggguugaacuguguagacaagcucacugaacaaugaaugcaa
chrX_40723	10867	chrX_40723	10867	3104	2592	2177	1131	822	1041	113.93	134.61	112.47	68.22	56.66	70.14	auauaauacaaccugcuaagu	auauaauacaaccugcuaaguguccuagcacuuaucagguuguauuaucauu
chr4_12074	10790	chr4_12074	10790	2171	1880	2165	1610	1532	1432	79.68	97.63	111.85	97.12	105.59	96.48	ugugugugggcgccggucgcuu	gaugcagagaggcccuaccgggagucagagaggaagaugugggcuugugugugggcgccggucgcuu
chrX_40728	10473	chrX_40728	10473	2953	1696	2074	1371	1155	1224	108.39	88.08	107.15	82.7	79.61	82.46	cuuaucagguuguauuguaauu	uuauaauacaaccugauaaguguuacagcacuuaucagguuguauuguaauu
chr14_33381	10187	chr14_33381	10187	2195	1511	1550	1782	1779	1370	80.56	78.47	80.08	107.49	122.62	92.3	cccgggugcuguaggcuc	cccgggugcuguaggcucacccacggcucugccucucccaccugcuugccauuuauaaagccuuugcucggggc
chr3_8973	9859	chr3_8973	9859	2039	3231	2633	608	573	775	74.84	167.8	136.03	36.68	39.49	52.21	ucccuguccuccaggagcucac	ucccuguccuccaggagcucacuuaccuugggccgugagcuccucgaggccagagccc
chr17_38341	9609	chr17_38341	9609	3087	2041	2444	360	929	748	113.3	105.99	126.27	21.72	64.03	50.39	uuugugugcucuuuuuuuu	uuugugugcucuuuuuuuuuuuuuuccccagaucaucaucauggagaaggggcagguggagg
chr2_5260	9428	chr2_5260	9428	2512	1759	1928	1121	998	1110	92.2	91.35	99.61	67.62	68.79	74.78	uuauaaagcaaugagacugauu	uuauaaagcaaugagacugauugucauaugucguuugugggauccgucucaguuacuuuauagcc
chr5_12969	9355	chr5_12969	9355	1408	1291	2084	1539	1583	1450	51.68	67.05	107.67	92.84	109.11	97.69	uccgagccugggucucccucu	ggggcuccccggugcucggaucucgagggugcuuauuguucgguccgagccugggucucccucu
chrX_40922	9314	chrX_40922	9314	3013	1509	1512	1156	989	1135	110.59	78.37	78.12	69.73	68.17	76.47	ugugacagauugauaacugaaa	ucggggaucaucaugucacgagagaccacugugcacuugugacagauugauaacugaaa
chr7_19857	9204	chr7_19857	9204	1907	2289	2373	917	986	732	69.99	118.87	122.6	55.32	67.96	49.32	gccugcugggguggaaccuggu	caggucacgucucugcaguuacacagcucacgagugccugcugggguggaaccuggu
chr16_36602	8508	chr16_36602	8508	2546	2289	993	990	902	788	93.45	118.87	51.3	59.72	62.17	53.09	ugagguaguaggcugugugggg	ugagguaguaggcuguguggggcugaugcaggggguccagacccucagggcccuccuguuccucuauuuuucuauaaagcauu
chr8_22207	8438	chr8_22207	8438	2544	1243	1010	1209	1097	1335	93.37	64.55	52.18	72.93	75.61	89.94	ugaccucuggucucccgcccugcu	ugaccucuggucucccgcccugcugccuucuggugucagucggggggggggggggggggggcuggguucuuuggg
chr18_39152	8209	chr18_39152	8209	2171	1091	1228	1336	1287	1096	79.68	56.66	63.44	80.59	88.71	73.84	uccgguucucagggcuccacc	aggaagcccuggaggggcuggaggugauggauguuuuccuccgguucucagggcuccacc
chr8_21245	7610	chr8_21245	7610	1360	1986	1742	993	800	729	49.92	103.14	90	59.9	55.14	49.11	cacgcucaugcacacacccaca	ugagugugugugugugagugugugucgcuccggguccacgcucaugcacacacccaca
chr12_28932	7409	chr12_28932	7409	1595	1906	1984	696	557	671	58.54	98.98	102.5	41.98	38.39	45.21	uaacagucuacagccauggucgc	accguggcuuucgauuguuacugugggaaccggagguaacagucuacagccauggucgc
chr13_30947	7348	chr13_30947	7348	1522	1935	1981	757	556	597	55.86	100.49	102.35	45.66	38.32	40.22	aaugacacgaucacucccguugagu	aaugacacgaucacucccguugagugggcacccaaguagccaucgggaaugucguguccgcc
chr7_19904	7234	chr7_19904	7234	2462	1870	1888	196	382	436	90.36	97.11	97.54	11.82	26.33	29.37	uagaagucugcuuguuuu	aucaaacaguucuugugcaagaguuauuugauuucuaagaaaucauuugagccuuuuauagaagucugcuuguuuu
chr11_26072	6693	chr11_26072	6693	1437	1960	1837	522	370	567	52.74	101.79	94.91	31.49	25.5	38.2	uagcagcacguaaauauuggc	uagcagcacguaaauauuggcguuaagauucuaaaauuaucuccaguauuaacugugcugcugaa
chr13_29906	6693	chr11_26072	6693	1437	1960	1837	522	370	567	52.74	101.79	94.91	31.49	25.5	38.2	uagcagcacguaaauauuggc	uagcagcacguaaauauuggcguuaagauucuaaaauuaucuccaguauuaacugugcugcugaa
chr12_28651	6619	chr10_25449	6619	1100	1309	1260	1003	981	966	40.37	67.98	65.1	60.5	67.62	65.08	acuggacuuggagucaga	acuggacuuggagucagaaaacuggaguuugagucuugguucuacugc
chr10_25450	6619	chr10_25449	6619	1100	1309	1260	1003	981	966	40.37	67.98	65.1	60.5	67.62	65.08	acuggacuuggagucaga	acuggacuuggagucagaaaacuggaguuugagucuugguucuacugc
chr10_25449	6619	chr10_25449	6619	1100	1309	1260	1003	981	966	40.37	67.98	65.1	60.5	67.62	65.08	acuggacuuggagucaga	acuggacuuggagucagaaaacuggaguuugagucuugguucuacugc
chr18_38904	6481	chr18_38904	6481	1655	1271	1108	943	792	712	60.74	66.01	57.24	56.88	54.59	47.97	uauggcacugguagaauucacu	uauggcacugguagaauucacugugaacagucucggucagugaauuaccgaagggccauaaa
chr12_29018	6080	chr12_29018	6080	1179	1050	1093	992	929	837	43.27	54.53	56.47	59.84	64.03	56.39	ugugucuguggccuaggcuggcg	gugguguaggucgcagacucggcuuggaucccgaguugcugugucuguggccuaggcuggcg
chr3_10044	5869	chr3_10044	5869	676	432	500	1532	1447	1282	24.81	22.43	25.83	92.41	99.74	86.37	aguggcuguggcucgacccc	gcucacaccaucgcuacuuggcauugccucuauaguggcuguggcucgacccc
chr5_14130	5869	chr3_10044	5869	676	432	500	1532	1447	1282	24.81	22.43	25.83	92.41	99.74	86.37	aguggcuguggcucgacccc	gcucacaccaucgcuacuuggcauugccucuauaguggcuguggcucgacccc
chr4_10976	5849	chr2_7147	5849	1197	1002	1130	877	838	805	43.93	52.04	58.38	52.9	57.76	54.24	ucuuugguuaucuagcuguauga	ucuuugguuaucuagcuguaugaguguauuggucuucauaaagcuagauaaccgaaagu
chr7_19252	5849	chr2_7147	5849	1197	1002	1130	877	838	805	43.93	52.04	58.38	52.9	57.76	54.24	ucuuugguuaucuagcuguauga	ucuuugguuaucuagcuguaugaguguauuggucuucauaaagcuagauaaccgaaagu
chr2_7147	5849	chr2_7147	5849	1197	1002	1130	877	838	805	43.93	52.04	58.38	52.9	57.76	54.24	ucuuugguuaucuagcuguauga	ucuuugguuaucuagcuguaugaguguauuggucuucauaaagcuagauaaccgaaagu
chr12_28868	5703	chr12_28868	5703	1205	936	819	947	913	883	44.23	48.61	42.31	57.12	62.93	59.49	cuagacugaagcucccugagc	ccagggaacgucuguagacagggagacccgagagggaauuugcuagacugaagcucccugagc
chr12_28812	5616	chr12_28812	5616	1676	1358	1018	629	397	538	61.51	70.52	52.59	37.94	27.36	36.25	uaaugccccuaaaaauccuuau	agggacuuucaggggcagcuguguuuucugacucagucauaaugccccuaaaaauccuuau
chrAEMK02000452.1_41465	5409	chrAEMK02000452.1_41465	5409	1223	1064	1167	513	747	695	44.89	55.26	60.29	30.95	51.49	46.82	guaugugggacgguaaaccgcu	ugguuuaccgucccacauacauuuugcauauguaugugggacgguaaaccgcu
chr18_38908	5357	chr18_38908	5357	1533	1118	973	603	495	635	56.27	58.06	50.27	36.37	34.12	42.78	uuuggcaaugguagaacucacacu	uuuggcaaugguagaacucacacuggugagauaaugggauccggugguucuagacuugccaacu
chr2_7103	5253	chr2_7103	5253	1116	1006	1081	716	711	623	40.96	52.24	55.85	43.19	49.01	41.97	ugcguggcuucucugugcaguc	ugcguggcuucucugugcagucuuuucuucugggaccugcacaggaaggccacggaggggc
chr6_14785	5201	chr6_14785	5201	1183	701	831	802	891	793	43.42	36.4	42.93	48.38	61.41	53.43	ucuggcugugguguagaccgu	cgucuacaucacagacauagcucugaucccgaguugcucuggcugugguguagaccgu
chr2_6344	5158	chr2_6344	5158	907	880	785	933	817	836	33.29	45.7	40.56	56.28	56.31	56.32	cuccuggggcccgcacucucgc	uggggagcggcccccgggcgggccucugcucuggccccuccuggggcccgcacucucgc
chr12_28933	5075	chr12_28933	5075	1157	1284	1108	578	483	465	42.47	66.68	57.24	34.87	33.29	31.33	accuuggcucuagacugcuuacu	accuuggcucuagacugcuuacugcccgggccgcccucaguaacagucuccagucacggcc
chrX_39981	5013	chrX_39981	5013	1019	896	935	788	691	684	37.4	46.53	48.31	47.53	47.63	46.08	ccguccuaagguuguugaguu	cucuucaaucucaggacucgcauaauuagcagaaugccguccuaagguuguugaguu
chr3_10021	4960	chr3_10021	4960	995	1574	2004	159	121	107	36.52	81.74	103.53	9.59	8.34	7.21	cucccugggcucugucuccu	cucccugggcucugucuccuugcucacugaguccuggagcuuggccagcugggaugagugggaggaggaaagguuuggguuugagug
chr18_39550	4948	chr18_39550	4948	995	1563	2004	159	120	107	36.52	81.17	103.53	9.59	8.27	7.21	cucccuggguucugccuccu	ggccagcaccgcaggcaccgaccccacugcucccuggguucugccuccu
chr6_17376	4899	chr6_17376	4899	821	560	701	912	1042	863	30.13	29.08	36.22	55.01	71.82	58.14	ucgaugauggucccuguguuug	uggcacaggguccagcugucggcuguaauacccgaugggucgaugauggucccuguguuug
chr9_24586	4898	chr9_24586	4898	566	1433	1727	386	372	414	20.77	74.42	89.22	23.28	25.64	27.89	ugccugucuacacuugcugugc	ugccugucuacacuugcugugcagaacauccgcucaccuguacagcaggcacagacaggcagu
chr4_12276	4789	chr4_12275	4789	903	911	935	828	597	615	33.14	47.31	48.31	49.95	41.15	41.43	cacucuggacucugaauc	cacucuggacucugaauccagcgugaauccgaguucgagucuc
chr4_12275	4789	chr4_12275	4789	903	911	935	828	597	615	33.14	47.31	48.31	49.95	41.15	41.43	cacucuggacucugaauc	cacucuggacucugaauccagcgugaauccgaguucgagucuc
chr6_15310	4679	chr6_15310	4679	1431	776	701	653	543	575	52.52	40.3	36.22	39.39	37.43	38.74	ugagaccucuggguucugagcu	ugagaccucuggguucugagcugugauguugcuuccaagcugggaucucuggggucuugguu
chr6_16798	4628	chr6_16798	4628	835	1188	1145	574	426	460	30.65	61.7	59.16	34.62	29.36	30.99	cuggcccucucugcccuuccgu	ggggggcaggaggggcucagggagaaagugugugccgccccuggcccucucugcccuuccgu
chrX_39897	4618	chrX_39897	4618	1475	981	698	482	445	537	54.14	50.95	36.06	29.08	30.67	36.18	augcaccugggcaaggauucuga	uaauccuugcuaccugggugagagugcugugugaaugcaaugcaccugggcaaggauucuga
chrX_40926	4541	chrX_40926	4541	828	826	1065	711	662	449	30.39	42.9	55.02	42.89	45.63	30.25	caaaacgugaggcgcugcuau	cagcagcaauucauguuuugaagggcuuuaaaugguucaaaacgugaggcgcugcuau
chr18_39296	4325	chr18_39296	4325	1477	754	841	396	413	444	54.21	39.16	43.45	23.89	28.47	29.91	uuuuucauuauugcuccugacc	ucaagagcaauaacgaaaaauguuugucauaaaccguuuuucauuauugcuccugacc
chr3_9392	4291	chr3_9392	4291	1146	1404	1133	241	165	202	42.06	72.91	58.54	14.54	11.37	13.61	gucaggauggccgaguggucuaagg	ugugccucuuggcugucuguauaucuucuuuggaaggugucaggauggccgaguggucuaagg
chr6_17431	4232	chr6_17431	4232	1158	1226	906	328	261	353	42.5	63.67	46.81	19.79	17.99	23.78	uggcagugucuuagcugguugu	uggcagugucuuagcugguuguugugaguaauagcaaaggaagcaaucagcaagcauccugcccua
chr15_35512	3987	chr15_35512	3987	565	846	914	663	562	437	20.74	43.94	47.22	39.99	38.74	29.44	ucuggcuccgugucuucacuccc	ucuggcuccgugucuucacucccguguguguccgaggagggagggagggacgggggcugugc
chrX_40950	3935	chrX_40950	3935	966	1100	912	347	306	304	35.46	57.13	47.12	20.93	21.09	20.48	ucaacacuugcugguuuccucu	gggagccaggaaguauugauguuucugccagguuagcgucaacacuugcugguuuccucu
chrAEMK02000452.1_41464	3715	chrAEMK02000452.1_41464	3715	591	875	972	473	357	447	21.69	45.44	50.22	28.53	24.61	30.12	uaguagaccguauagcguacg	uaguagaccguauagcguacgcuuuaucugugacguauguaacacgguccacuaac
chrAEMK02000682.1_41856	3620	chrAEMK02000682.1_41856	3620	409	956	1183	421	302	349	15.01	49.65	61.12	25.4	20.82	23.51	ucguaccgugaguaauaaugc	cauuauuacuuuugguacgcgcugugacacuucaaacucguaccgugaguaauaaugc
chr6_17114	3559	chr6_17114	3559	739	792	635	475	463	455	27.12	41.13	32.81	28.65	31.91	30.65	gcaaagcacacggccugcagagagg	ucucugggccugugucuuaggcucugcaagaucaaccgagcaaagcacacggccugcagagagg
chr1_1751	3504	chr1_1751	3504	880	829	865	285	308	337	32.3	43.05	44.69	17.19	21.23	22.7	uaggggucaaaucagagcugua	uaggggucaaaucagagcuguagcugccugccuaugccacagccauagcacagcaucugagaccucaucu
chr14_34012	3303	chr14_34012	3303	992	585	535	412	391	388	36.41	30.38	27.64	24.85	26.95	26.14	cacuagauucugagcuccuga	ggccuagcuuugugucuguguauuucacuagauucugagcuccuga
chr2_5089	3250	chr2_5089	3250	405	586	649	499	600	511	14.86	30.43	33.53	30.1	41.36	34.43	cucugcccgcucucugucuuacagc	gugaggcaggcgggaggcgggugugagacccugggccggccagguggacgcgcucacucacccucugcccgcucucugucuuacagc
chr18_38821	3142	chr18_38821	3142	270	134	143	1101	743	751	9.91	6.96	7.39	66.41	51.21	50.6	cuacucggcgucgcuuuu	cggacuucccggguggcucacaaccuaacuacucggcgucgcuuuu
chr10_25881	3141	chr10_25881	3141	685	509	538	501	492	416	25.14	26.43	27.8	30.22	33.91	28.03	agugugugggcgccggacgcu	agugugugggcgccggacgcugcaggagaugcgggaguccucugugcccucgaugccc
chr10_25137	3136	chr10_25137	3136	664	523	548	973	205	223	24.37	27.16	28.31	58.69	14.13	15.02	ugguggucuaguggcuaggauu	aucuggccaugaagaccuuuguggggaguuuccugguggucuaguggcuaggauu
chr17_37786	2985	chr17_37786	2985	861	918	818	108	153	127	31.6	47.67	42.26	6.51	10.55	8.56	cgacaccauggcccuggg	cgacaccauggcccuggggccgcucaggguuccugcggu
chr2_6719	2967	chr2_6719	2967	746	715	664	325	230	287	27.38	37.13	34.3	19.6	15.85	19.34	aacauucauuguugucggugggu	aacauucauuguugucgguggguugugagacggaggccagacccaccgagggaugaaugucac
chr4_10445	2942	chr4_10445	2942	1302	445	450	274	220	251	47.79	23.11	23.25	16.53	15.16	16.91	uuuugaaauauguuccugaac	cgaggagguguuuuuguuuagcugcuaauaaaguggcauuuugaaauauguuccugaac
chr9_24578	2910	chr9_24578	2910	494	585	661	387	385	398	18.13	30.38	34.15	23.34	26.54	26.81	ugugacuguggcauagaccuc	gcagacaucacagaugcagcuugguucugguugcugugacuguggcauagaccuc
chr13_29718	2894	chr13_29718	2894	490	587	658	382	384	393	17.98	30.48	33.99	23.04	26.47	26.48	ugugguuguggcauagaccuc	agggucuaggucgcagauacagcuugguucugguguugcugugguuguggcauagaccuc
chr8_22235	2810	chr8_22235	2810	756	373	422	456	422	381	27.75	19.37	21.8	27.51	29.09	25.67	ugaggaaguagguuguaa	ugaggaaguagguuguaaugccauuacaggucauuuucucucc
chrAEMK02000452.1_41483	2802	chrAEMK02000452.1_41483	2802	358	328	462	548	590	516	13.14	17.03	23.87	33.06	40.67	34.76	aaacauucgcggugcacuucuu	aaguugcccgugucuuuuucgcuuuauuugugacgaaacauucgcggugcacuucuu
chr1_2921	2792	chr1_2921	2792	547	750	742	243	266	244	20.08	38.95	38.33	14.66	18.33	16.44	ugggucacagaagagggucuggg	ugggucacagaagagggucugggggacagguuaugaguccucccaccaauauccuccagacagcccacuccccaga
chr7_19839	2777	chr7_19839	2777	515	635	597	360	319	351	18.9	32.98	30.84	21.72	21.99	23.65	cccugaacuaggggucuggagg	gcugacuccuaguccagugcuugugauggcuggugggcccugaacuaggggucuggagg
chr3_9380	2745	chr3_9380	2745	754	667	571	312	208	233	27.67	34.64	29.5	18.82	14.34	15.7	aacuggcccacaaagucccgcu	cgggguuuugagggcgagaugaguuuauguuuuauccaacuggcccacaaagucccgcu
chrX_39749	2718	chrX_39749	2718	409	259	300	599	609	542	15.01	13.45	15.5	36.13	41.98	36.52	ucucgcuggggccuccaaa	uggaggcguccgaguuccaaaagcuggagggucugugucucgcuggggccuccaaa
chr8_22516	2705	chr8_22515	2705	707	452	443	349	376	378	25.95	23.47	22.89	21.05	25.92	25.47	ucugugaacuagaaaccucugg	ucugugaacuagaaaccucuggaaagugguguacauuuuacuuccacccacaagucaaguuucagcucacuuaac
chr8_22515	2705	chr8_22515	2705	707	452	443	349	376	378	25.95	23.47	22.89	21.05	25.92	25.47	ucugugaacuagaaaccucugg	ucugugaacuagaaaccucuggaaagugguguacauuuuacuuccacccacaagucaaguuucagcucacuuaac
chr4_10633	2701	chr4_10633	2701	468	472	546	437	383	395	17.18	24.51	28.21	26.36	26.4	26.61	ugugucuguggccuaggccggca	caggucacagacacagcuuggaucccagguugcugugucuguggccuaggccggca
chr14_32631	2663	chr14_32631	2663	477	455	523	464	409	335	17.51	23.63	27.02	27.99	28.19	22.57	uggacguuggcucuggugguga	ccaccuccccugcaaacguccagugaugcagagguaauggacguuggcucuggugguga
chrAEMK02000598.1_41778	2578	chrAEMK02000598.1_41778	2578	429	445	532	416	372	384	15.75	23.11	27.49	25.09	25.64	25.87	ugugucuguggucuaggcuggca	uguaggucacagacauggcuuggaucugacauagcugugucuguggucuaggcuggca
chrX_39639	2578	chrAEMK02000598.1_41778	2578	429	445	532	416	372	384	15.75	23.11	27.49	25.09	25.64	25.87	ugugucuguggucuaggcuggca	uguaggucacagacauggcuuggaucugacauagcugugucuguggucuaggcuggca
chrAEMK02000661.1_42008	2578	chrAEMK02000598.1_41778	2578	429	445	532	416	372	384	15.75	23.11	27.49	25.09	25.64	25.87	ugugucuguggucuaggcuggca	uguaggucacagacauggcuuggaucugacauagcugugucuguggucuaggcuggca
chrX_39640	2578	chrAEMK02000598.1_41778	2578	429	445	532	416	372	384	15.75	23.11	27.49	25.09	25.64	25.87	ugugucuguggucuaggcuggca	uguaggucacagacauggcuuggaucugacauagcugugucuguggucuaggcuggca
chr13_30842	2577	chr13_30842	2577	430	447	530	415	368	387	15.78	23.21	27.38	25.03	25.36	26.07	ugugucugugaccuaggcuggca	ucauguaggucgaagacacagcuuggauccugcauugcugugucugugaccuaggcuggca
chr14_33172	2472	chr14_33172	2472	641	474	601	308	236	212	23.53	24.62	31.05	18.58	16.27	14.28	ugagaacugaauuccauaggcugu	ugagaacugaauuccauaggcugugagcucuagcaaaugcccuaggaacucaguucuggu
chrAEMK02000452.1_41489	2464	chrAEMK02000452.1_41489	2464	328	499	806	272	289	270	12.04	25.91	41.64	16.41	19.92	18.19	aaaaauacgggugcacuucuau	agagguuauccgucuuucuucgcuuuauucaugacgaaaaauacgggugcacuucuau
chr14_34230	2318	chr14_34230	2318	547	600	556	215	176	224	20.08	31.16	28.73	12.97	12.13	15.09	agcagcauuguacagggcuau	agcuucuuuacaguguugccuuguggcauggaguucaagcagcauuguacagggcuau
chr13_29388	2269	chr13_29387	2269	290	531	669	219	271	289	10.64	27.58	34.56	13.21	18.68	19.47	uuugcucugcuccugccacaugc	uuguuggaggggugggggagugcaugugguguggaauuaggacuuucagacucuccuguuuugcucugcuccugccacaugc
chr13_29387	2269	chr13_29387	2269	290	531	669	219	271	289	10.64	27.58	34.56	13.21	18.68	19.47	uuugcucugcuccugccacaugc	uuguuggaggggugggggagugcaugugguguggaauuaggacuuucagacucuccuguuuugcucugcuccugccacaugc
chr2_4214	2207	chr2_4214	2207	532	419	376	331	259	290	19.53	21.76	19.43	19.97	17.85	19.54	ucccugagacccuagcuua	ucccugagacccuagcuuacccucaccgaccacaggcuagggucuuggcacug
chr4_10340	2200	chr4_10340	2200	639	684	538	95	123	121	23.45	35.52	27.8	5.73	8.48	8.15	uguaaacauccuacacucagcu	uguaaacauccuacacucagcuguaauacauggauuggcugggagguggauguuuacuuc
chr6_17427	2169	chr6_17427	2169	488	371	373	276	356	305	17.91	19.27	19.27	16.65	24.54	20.55	ucggcgucugcagcucccucugc	ucggcgucugcagcucccucugcuuauuccucgggcggcgaccuucagcggccgggugaggacucgagggagggcugccg
chr6_17428	2169	chr6_17427	2169	488	371	373	276	356	305	17.91	19.27	19.27	16.65	24.54	20.55	ucggcgucugcagcucccucugc	ucggcgucugcagcucccucugcuuauuccucgggcggcgaccuucagcggccgggugaggacucgagggagggcugccg
chr16_37578	2114	chr16_37578	2114	576	513	481	182	141	221	21.14	26.64	24.85	10.98	9.72	14.89	ugagugugugugugugagugugu	aucuuugcacacaaaucuugugugugugucauuauuuccugagugugugugugugagugugu
chr6_15133	2064	chr6_15133	2064	211	420	463	356	336	278	7.74	21.81	23.92	21.47	23.16	18.73	auccugccgacuaugcca	gcagagguccagggucucagcugcugcagcaaugggcuugaacagggcccggccaggaaugcugaauccugccgacuaugcca
chrMT_41304	2048	chrMT_41304	2048	273	321	327	239	404	484	10.02	16.67	16.89	14.42	27.85	32.61	gaauggaaugcuuguuuuggu	aaguacuuggcguuuugguuugcauacgaauggaaugcuuguuuuggu
chr13_30456	2018	chr13_30456	2018	260	141	152	423	560	482	9.54	7.32	7.85	25.52	38.6	32.47	aguggcuguggcucgacu	aguggcuguggcucgacuccuggcuccagagcuuccauaugccgcaga
chr18_39543	2014	chr18_39543	2014	236	199	205	544	423	407	8.66	10.33	10.59	32.82	29.16	27.42	aucccagcggugucucca	aucccagcggugucuccagcccugguugcagccgccggccgcg
chr12_27311	2002	chr12_27311	2002	233	552	518	249	233	217	8.55	28.67	26.76	15.02	16.06	14.62	cuacucuguccccaccuccagg	agggagguggcgacagugguacuuauccagagcguaugugugguugaggcuacucuguccccaccuccagg
chr14_33560	1973	chr14_33560	1973	217	501	491	299	259	206	7.96	26.02	25.37	18.04	17.85	13.88	aucccacuccugacaccc	guuucagggugaucgucuuuguucugccuccugcagaaguacacggaucccacuccugacaccc
chr11_26076	1965	chr11_26076	1965	398	460	604	212	135	156	14.61	23.89	31.21	12.79	9.3	10.51	uguuguacuuuuuuuuuuguuc	uguuguacuuuuuuuuuuguucguugcauuuuuaggaacaaaaaaaaaagcccaacccu
chr2_6136	1926	chr2_6136	1926	452	288	280	256	336	314	16.59	14.96	14.47	15.44	23.16	21.16	uuuguuggcuccucugaagug	cucuccgaggggccuucaagggcaaguucuugucaccuuuguuggcuccucugaagug
chr7_19848	1871	chr7_19848	1871	628	367	321	197	167	191	23.05	19.06	16.58	11.88	11.51	12.87	uuguacaugguaggcuuucauu	uuguacaugguaggcuuucauucauucguuugcacaugcggugaaggucuacugugugccagg
chr7_18775	1861	chr7_18775	1861	450	231	265	355	314	246	16.52	12	13.69	21.41	21.64	16.57	agaguugagucuggacgucccg	ugauuguccaaacgcaauucucgagucuauagcucuggccgagaguugagucuggacgucccg
chr1_3195	1829	chr1_3195	1829	289	218	305	361	355	301	10.61	11.32	15.76	21.78	24.47	20.28	uggagugugacaaugguguuu	uggagugugacaaugguguuuguguccaaacuaucaaacgccauuaucacacuaaaua
chr12_27948	1804	chr12_27948	1804	254	407	401	268	253	221	9.32	21.14	20.72	16.17	17.44	14.89	gcucugugaugaaccccaug	gcucugugaugaaccccaugcgugucaucugagccuggcuucccugucagcucagcccagguaguguucuacuucucagggcug
chr1_22	1793	chr1_22	1793	472	575	586	47	50	63	17.32	29.86	30.28	2.84	3.45	4.24	guggcgccccaguggcuc	guggcgccccaguggcucccucuugcccugggccucucacag
chrAEMK02000452.1_41491	1792	chrAEMK02000452.1_41491	1792	294	446	570	177	167	138	10.79	23.16	29.45	10.68	11.51	9.3	agauauugcacgguugaucucu	agguuguccgugauguauuugcuuuauuuguggcagauauugcacgguugaucucu
chr3_8869	1785	chr3_8869	1785	470	571	583	48	50	63	17.25	29.65	30.12	2.9	3.45	4.24	guggcgccccagcagcuc	gcugcacccucguccucccuaggagacuuccuggagguggcgccccagcagcuc
chr4_10954	1742	chr4_10954	1742	446	555	376	150	103	112	16.37	28.82	19.43	9.05	7.1	7.55	gucaccuggcagguaccucuuu	gucaccuggcagguaccucuuuuguuucguauggugucaugcuagguugauaa
chr6_17654	1668	chr6_17654	1668	397	415	355	161	167	173	14.57	21.55	18.34	9.71	11.51	11.66	guccaggaugaaaccuuaucugagu	ucaggguauuuuuuccaggcugugacugguccaggaugaaaccuuaucugagu
chr17_37902	1619	chr17_37902	1619	269	298	436	225	197	194	9.87	15.48	22.53	13.57	13.58	13.07	uuaagacuugcagugauguuu	uuaagacuugcagugauguuuaacuccucuccacgugaacaucacagcaagucugugcu
chr2_6016	1596	chr2_6016	1596	394	247	239	254	230	232	14.46	12.83	12.35	15.32	15.85	15.63	uuauccgggcuugugcugaagc	ucuagcaccucccuggagacgagcauccagcuguguagccuuauccgggcuugugcugaagc
chrX_40909	1543	chrX_40909	1543	336	467	310	169	112	149	12.33	24.25	16.02	10.19	7.72	10.04	caaagugcucacagugcagguagg	caaagugcucacagugcagguagguuuugcauuacucuacuguagugugggcacuucc
chrX_40875	1536	chrX_40875	1536	319	202	249	301	261	204	11.71	10.49	12.86	18.16	17.99	13.74	ccuggacuugaagucagaaggc	ccuggacuugaagucagaaggccuagaaaauaugcuaagauaggcaacuuccuuugccaguugauaugaauccaucac
chrAEMK02000452.1_41718	1519	chrAEMK02000452.1_41718	1519	512	283	280	154	110	180	18.79	14.7	14.47	9.29	7.58	12.13	uugaacuguuaagaaccacugg	agugguccuaaacauuucacaauugcgcuacagaacuguugaacuguuaagaaccacugg
chr15_35444	1514	chr15_35444	1514	388	450	420	89	97	70	14.24	23.37	21.7	5.37	6.69	4.72	acugagccacgacgggaacuc	acugagccacgacgggaacuccauuaagugaaaauucugauggcaguguuuguaguaaaguag
chr7_19751	1511	chr7_19751	1511	139	396	418	198	193	167	5.1	20.57	21.6	11.94	13.3	11.25	cucccacuccugacaccau	ggaagaagaaguggggcuucgauguuuacucccacuccugacaccau
chr7_21050	1509	chr7_21050	1509	129	389	414	199	203	175	4.73	20.2	21.39	12	13.99	11.79	accccacuccugacacca	gugcuggagaagggggcagaguggucuucaccccacuccugacacca
chr2_6514	1502	chr2_6514	1502	448	233	251	194	209	167	16.44	12.1	12.97	11.7	14.41	11.25	ugugucugugacaucugcuggc	caguguaggucauagacucagcuuggaucugguguugcugugucugugacaucugcuggc
chr2_5866	1456	chr2_5866	1456	291	403	451	115	82	114	10.68	20.93	23.3	6.94	5.65	7.68	cugugcgugugacagcggcugau	agccacugcccaccgcacacugcgcugcuccggacccacugugcgugugacagcggcugau
chr17_38245	1449	chr17_38245	1449	306	346	323	152	178	144	11.23	17.97	16.69	9.17	12.27	9.7	uccuguacugagcugccccgagg	uccuguacugagcugccccgaggcccucacugugcccagcucgggccagcucaguacccggcg
chr17_38246	1449	chr17_38245	1449	306	346	323	152	178	144	11.23	17.97	16.69	9.17	12.27	9.7	uccuguacugagcugccccgagg	uccuguacugagcugccccgaggcccucacugugcccagcucgggccagcucaguacccggcg
chr12_28979	1444	chr12_28979	1444	123	376	407	192	192	154	4.51	19.53	21.03	11.58	13.23	10.38	aucccacucuugacacca	aucccacucuugacaccaccacccgugcguuuuaugccacugcucugggugugacaucagugggggag
chrX_40991	1441	chrX_40991	1441	478	429	349	54	67	64	17.54	22.28	18.03	3.26	4.62	4.31	caagucacuagugguuccguuu	caagucacuagugguuccguuuaguagaagguuuugcauuguuucaaaauggugcccuagugacu
chr18_38887	1421	chr18_38887	1421	198	419	564	67	90	83	7.27	21.76	29.14	4.04	6.2	5.59	uagcaccauuugaaaucaguguu	gcugguuucauauggugguuuagauuuaaaaagugauugucuagcaccauuugaaaucaguguu
chr9_23757	1421	chr18_38887	1421	198	419	564	67	90	83	7.27	21.76	29.14	4.04	6.2	5.59	uagcaccauuugaaaucaguguu	gcugguuucauauggugguuuagauuuaaaaagugauugucuagcaccauuugaaaucaguguu
chr7_20523	1398	chr7_20523	1398	503	335	326	73	86	75	18.46	17.4	16.84	4.4	5.93	5.05	aagguagauagaacaggucuug	aagguagauagaacaggucuuguuugcaagaugaauucaagaccuacuuuucuaccaacagc
chrAEMK02000452.1_41514	1392	chrAEMK02000452.1_41514	1392	352	283	275	200	136	146	12.92	14.7	14.21	12.06	9.37	9.84	gaaguuguucgugguggauucg	gaaguuguucgugguggauucgcuuuacuuaugacgaaucauucacggacaacacuuu
chr5_12881	1371	chr5_12881	1371	483	357	374	24	44	89	17.73	18.54	19.32	1.45	3.03	6	gggccugcucaccuuucuuc	aucaaggcugacaagguuccaugaccuggggccugcucaccuuucuuc
chr13_30942	1355	chr13_30942	1355	255	380	614	46	37	23	9.36	19.73	31.72	2.77	2.55	1.55	cuuccugggcucugccucca	ggggcuccaggcggcagucugccugcuuccugggcucugccucca
chr13_30465	1351	chr13_30465	1351	297	221	243	166	183	241	10.9	11.48	12.55	10.01	12.61	16.24	agcaaugauggaucuaagc	cuaggggucuaauuggagcuguaaccacuggccuacaccagggccauagcaaugauggaucuaagc
chr2_6732	1328	chr10_25137	1328	273	253	279	365	69	89	10.02	13.14	14.41	22.02	4.76	6	uggucuaguggcuaggau	aucuggccaugaagaccuuuguggggaguuuccugguggucuaguggcuaggauu
chr6_14982	1289	chr6_14982	1289	504	282	363	55	44	41	18.5	14.65	18.75	3.32	3.03	2.76	auggauuuugggagcaggaa	auggauuuugggagcaggaagaccugucccagcaacauga
chr2_5815	1271	chr2_5815	1271	238	133	181	221	230	268	8.74	6.91	9.35	13.33	15.85	18.06	guggauuuuuggagcugga	uaugugacuuaucuuuacugcaacuuaagcaguggauuuuuggagcugga
chr9_22740	1243	chr8_22524	1243	103	273	313	204	155	195	3.78	14.18	16.17	12.31	10.68	13.14	cuccuggcuggcucgcca	gcugcugcuaggaacuuaccagaaaauuccccaacuggggccggcuggucacaaauagcaagacuccuggcuggcucgcca
chr8_22524	1243	chr8_22524	1243	103	273	313	204	155	195	3.78	14.18	16.17	12.31	10.68	13.14	cuccuggcuggcucgcca	gcugcugcuaggaacuuaccagaaaauuccccaacuggggccggcuggucacaaauagcaagacuccuggcuggcucgcca
chr11_26229	1239	chr11_26229	1239	400	411	407	12	3	6	14.68	21.34	21.03	0.72	0.21	0.4	aaauggauuuuuggaaagu	uaguggaguagucuauuauuagaacaaauggauuuuuggaaagu
chr5_14345	1230	chr5_14345	1230	142	294	259	226	147	162	5.21	15.27	13.38	13.63	10.13	10.91	ucccuguggucuagugguuagga	ucccuguggucuagugguuaggacuugguacuuucaccauuccggccuggguucaaucucuggucugggaac
chr14_34423	1215	chr14_34423	1215	229	378	299	82	109	118	8.41	19.63	15.45	4.95	7.51	7.95	ucccuguccuccaggagcccaca	ucccuguccuccaggagcccacauggggaaguaaggaugaagggcccuauugaaaugguucaaagagcggggcag
chr2_6262	1206	chr2_6262	1206	231	413	526	10	11	15	8.48	21.45	27.18	0.6	0.76	1.01	cccugggcucugccuccu	gaaggagccuugagggaggacacggaaccggaaagaggcugguuaacugucccuggagcccugggcucugccuccu
chrAEMK02000452.1_41471	1205	chrAEMK02000452.1_41471	1205	381	238	192	152	126	116	13.98	12.36	9.92	9.17	8.68	7.82	cacauuacacggucgaccucu	aggugguccguggcgcguucgcuuuauuuauggcgcacauuacacggucgaccucu
chr1_3755	1145	chr1_3755	1145	105	317	585	41	44	53	3.85	16.46	30.22	2.47	3.03	3.57	uauugcacauuacuaaguugca	uauugcacauuacuaaguugcauguugucacggccucagugcaauuuagugugugugauauu
chrAEMK02000569.1_41899	1127	chrAEMK02000569.1_41899	1127	224	248	290	177	111	77	8.22	12.88	14.98	10.68	7.65	5.19	cggaagcgcgcugggcccc	cgccccgccccugcguggccgcugauuccggaagcgcgcugggcccc
chrX_40204	1117	chrX_40204	1117	211	190	290	115	145	166	7.74	9.87	14.98	6.94	9.99	11.18	uggcuaugauguagucuggcagcua	uggcuaugauguagucuggcagcuauagcuuguuuucaaccccuagccugg
chrX_40908	1087	chrX_40908	1087	233	210	280	122	113	129	8.55	10.91	14.47	7.36	7.79	8.69	ugugcaaauccaugcaaaacug	guuuugcagguuugcauuucagcguauguauguguauauggcugugcaaauccaugcaaaacug
chr9_24525	1080	chr9_24525	1080	210	208	144	135	179	204	7.71	10.8	7.44	8.14	12.34	13.74	ccaucugugggauuaugacug	ccaucugugggauuaugacugaaugucuuuaagucagaaucccacccaggc
chr14_34187	1077	chr14_34187	1077	299	150	241	131	120	136	10.97	7.79	12.45	7.9	8.27	9.16	ugagccaugacgggaacuccuc	ugagccaugacgggaacuccucaccauguuucuuguuaggcuuauu
chr14_34188	1077	chr14_34187	1077	299	150	241	131	120	136	10.97	7.79	12.45	7.9	8.27	9.16	ugagccaugacgggaacuccuc	ugagccaugacgggaacuccucaccauguuucuuguuaggcuuauu
chrX_39900	1062	chrX_39900	1062	220	281	258	102	75	126	8.07	14.59	13.33	6.15	5.17	8.49	aauccuuggaaccuaggugugagu	aauccuuggaaccuaggugugagugcugcucuagugcaacacaccuauucaaggauuc
chr10_24829	1060	chr10_24829	1060	290	200	176	180	96	118	10.64	10.39	9.09	10.86	6.62	7.95	guaaaccaggggucgcgagu	acagcgcgccagguagugagcaggcuccauagcucagugguuagagcacuggucuuguaaaccaggggucgcgagu
chr2_6466	1056	chr2_6466	1056	241	194	175	137	144	165	8.85	10.07	9.04	8.26	9.93	11.12	ccuagccugggaaccuccaua	ccuagccugggaaccuccauaugccaugggagcagcccuaggaaaggaa
chr5_14105	1027	chr5_14105	1027	261	252	310	78	80	46	9.58	13.09	16.02	4.71	5.51	3.1	gagcaugaugaggaugcagcugauu	gagcaugaugaggaugcagcugauuagggaugguccaguucucgggauucaaaucaugcaaau
chrAEMK02000452.1_41479	1026	chrAEMK02000452.1_41479	1026	286	342	230	60	55	53	10.5	17.76	11.88	3.62	3.79	3.57	ugaaacauacacgggaaaccucu	agguuguccguguugucuucucuuuacuuaugaugaaacauacacgggaaaccucu
chr9_23879	1015	chr9_23879	1015	189	317	283	94	55	77	6.94	16.46	14.62	5.67	3.79	5.19	ucuacagugcacgugucuccagu	ucuacagugcacgugucuccaguguggcucggaggcuggagacgcggcccuguuggagu
chr16_36885	953	chr16_36885	953	361	218	35	234	54	51	13.25	11.32	1.81	14.12	3.72	3.44	aucucggugggaccucug	aaggcaaaucgggagggcuggucaucaugcugguuuagaugauacaugcucaaucucggugggaccucug
chrX_40143	948	chrX_40143	948	243	246	228	97	54	80	8.92	12.78	11.78	5.85	3.72	5.39	aauggcgccacuaggguugugc	acaacccuaggagagggugccauucacauagacuauaauugaauggcgccacuaggguugugc
chr3_9221	946	chr3_9221	946	115	95	129	183	246	178	4.22	4.93	6.66	11.04	16.96	11.99	gugaaaugauggucgcugauc	gugaaaugauggucgcugauccucacccucagcgucucccaacuuuugcaa
chr5_14492	925	chr5_14492	925	308	227	264	47	44	35	11.3	11.79	13.64	2.84	3.03	2.36	aaauggauuuuuggggcaa	gcaaacgaagaugcugaaagucaaaaauuccugacaaauggauuuuuggggcaa
chrAEMK02000452.1_41517	922	chrAEMK02000452.1_41517	922	280	154	102	148	112	126	10.28	8	5.27	8.93	7.72	8.49	cccaauacacggucgaucucu	agguuguccguggugaguucgcauuauuuaaugaugcccaauacacggucgaucucu
chr16_36705	907	chr16_36705	907	87	195	194	127	171	133	3.19	10.13	10.02	7.66	11.79	8.96	gggggcguagcucaguggg	cucuccguuagcuccgcccugccacuacaagagggcgggugggggcguagcucaguggg
chr3_7628	872	chr3_7628	872	119	121	177	149	151	155	4.37	6.28	9.14	8.99	10.41	10.44	ugagggaagcugugccgugagc	ugagggaagcugugccgugagcgcuagcguuggucucacuuccugccuc
chr1_3099	865	chr1_3099	865	367	195	203	18	48	34	13.47	10.13	10.49	1.09	3.31	2.29	cuuugugugcucucuucc	cuuugugugcucucuuccuuucgaaaauuaguucuuauggacagagacucaaagau
chr7_19854	856	chr7_19854	856	169	172	149	141	113	112	6.2	8.93	7.7	8.51	7.79	7.55	ucuuggaguaggucauugggu	ucuuggaguaggucauuggguggauccuuuauuucccuaugugggccacuggauggcuccuccauggc
chr15_35684	847	chr15_35684	847	286	246	178	48	44	45	10.5	12.78	9.2	2.9	3.03	3.03	agugguuaguacucugcg	uuuggacugacuugacugacuaaaccacaguucugaaucugucccagcugugauccuccagugguuaguacucugcg
chr9_23929	825	chr9_23929	825	104	353	229	46	34	59	3.82	18.33	11.83	2.77	2.34	3.98	aaggagcuuacaaucuagcuggg	aaggagcuuacaaucuagcugggggugaaugacuugcacaugaacgcaacuagacugugagcuucu
chr14_32619	816	chr14_32619	816	113	197	258	83	79	86	4.15	10.23	13.33	5.01	5.45	5.79	uggcucaguucagcuggagcag	guuccugcuguuccuuggugacaaaauguggguucauuugcgaaacauuuucuggcucaguucagcuggagcag
chr4_12434	773	chr4_12434	773	362	298	2	111	0	0	13.29	15.48	0.1	6.7	0	0	ggggcuuagcugcuuggg	cggaucugcuucugccagcgguggcugggggcuuagcugcuuggg
chr5_13722	755	chr3_8096	755	171	202	180	84	54	64	6.28	10.49	9.3	5.07	3.72	4.31	uuggcucugcgaggucggcu	gagguugguggugcugacguuggcucugcgaggucggcucaaggugggucuggauauugagcaggccugucagggcguugucacccacaccagga
chrX_39905	753	chrX_39905	753	358	237	66	57	15	20	13.14	12.31	3.41	3.44	1.03	1.35	augcaccugggcaaggauucag	uaauccuagcuauccggguccuagugcugucucgaagcaaugcaccugggcaaggauucag
chrAEMK02000310.1_42223	748	chrAEMK02000310.1_42223	748	307	149	204	37	28	23	11.27	7.74	10.54	2.23	1.93	1.55	cuggauuuuuggagcaggu	cugaaucuccucagggugcccauccuggauuuuuggagcaggu
chrX_39904	747	chrX_39904	747	184	207	175	72	45	64	6.75	10.75	9.04	4.34	3.1	4.31	uacccauugcauaucggaguug	uacccauugcauaucggaguugugaauucucaaagcaccuccuaugugcaugguuuac
chr2_7208	730	chr2_6820	730	224	134	122	77	70	103	8.22	6.96	6.3	4.64	4.82	6.94	agggggcucugaaugugu	cccaguguucagacuaccuguucagggggcucugaauguguacaguagucugcacauugguu
chr15_34602	728	chr15_34602	728	132	166	147	91	85	107	4.84	8.62	7.59	5.49	5.86	7.21	caacuagacugugagcuucu	caacuagacugugagcuucucaaaagcaaacauuuucacccuuggc
chr9_23737	725	chr9_23737	725	142	192	155	75	62	99	5.21	9.97	8.01	4.52	4.27	6.67	ucuccuugcgagucucugcugc	gcggggacucguauggaaggagacgcugcuggugaccuguucucuccuugcgagucucugcugc
chr9_23738	725	chr9_23737	725	142	192	155	75	62	99	5.21	9.97	8.01	4.52	4.27	6.67	ucuccuugcgagucucugcugc	gcggggacucguauggaaggagacgcugcuggugaccuguucucuccuugcgagucucugcugc
chr12_28712	696	chr12_28711	696	198	186	171	55	49	37	7.27	9.66	8.83	3.32	3.38	2.49	uagugcaauauugcuuauaggguu	uagugcaauauugcuuauaggguuuugguguuugggaagaacuaugggcaaguugcagauacu
chr12_28711	696	chr12_28711	696	198	186	171	55	49	37	7.27	9.66	8.83	3.32	3.38	2.49	uagugcaauauugcuuauaggguu	uagugcaauauugcuuauaggguuuugguguuugggaagaacuaugggcaaguugcagauacu
chrAEMK02000452.1_41630	689	chrAEMK02000452.1_41630	689	98	81	117	109	123	161	3.6	4.21	6.04	6.58	8.48	10.85	guaugugggacgguaaaccau	cgguuuaccgucccacauacauaugcaaaauguaugugggacgguaaaccau
chr3_8951	685	chr3_8951	685	112	80	104	151	113	125	4.11	4.15	5.37	9.11	7.79	8.42	augggucugacggagcagccgc	cucugcccccuuugucacaugggucugacagacccaugggucugacggagcagccgc
chr7_20317	684	chr6_17114	684	97	158	185	75	82	87	3.56	8.21	9.56	4.52	5.65	5.86	ucucugggccugugucuu	ucucugggccugugucuuaggcucugcaagaucaaccgagcaaagcacacggccugcagagagg
chr9_22946	642	chr9_22946	642	173	161	147	63	26	72	6.35	8.36	7.59	3.8	1.79	4.85	aggcaguguaguuagcugauugc	aggcaguguaguuagcugauugcugauaaaaccaaucacuaaccacacggccagg
chr11_26489	640	chr11_26489	640	43	193	200	90	50	64	1.58	10.02	10.33	5.43	3.45	4.31	agcaggacgguggccaggg	agcaggacgguggccagggcgcugcagaucacggcggccagggcugugucccgcggg
chr7_19834	635	chr7_19834	635	64	104	107	169	92	99	2.35	5.4	5.53	10.19	6.34	6.67	agggugcuaucugugacugagggac	agggugcuaucugugacugagggacauggcgcauagaacugucucacacagaaaucgcacccguc
chr2_5481	616	chr2_5481	616	161	83	87	93	113	79	5.91	4.31	4.49	5.61	7.79	5.32	ugacaaugauguauccacugagc	ccagggaucaaaccuaugucgcagcgguaaccuaagacacagcagugacaaugauguauccacugagc
chr11_26405	612	chr11_26405	612	93	123	129	100	96	71	3.41	6.39	6.66	6.03	6.62	4.78	ugugccuguggcguagaccagc	ugcaguguaagucacagaugcgguucggaucugucgaugcugugccuguggcguagaccagc
chr17_38365	605	chr17_38365	605	89	96	69	250	58	43	3.27	4.99	3.56	15.08	4	2.9	uagugguuaggguucggca	uagugguuaggguucggcacuuucagagcuucagccuggguucaaucccuggucuggaaacugagaccccacauuaacucacuaca
chr1_32	597	chr1_32	597	82	93	72	249	55	46	3.01	4.83	3.72	15.02	3.79	3.1	uagugguugggauucggca	uagugguugggauucggcacuuucacauugcagcccggguucgaucccuggucugggaacugagaucccacaucaagccgcugca
chr14_32478	589	chr14_32477	589	157	126	101	76	63	66	5.76	6.54	5.22	4.58	4.34	4.45	gagcaugauggcaauucugagg	ucauauugaugaucuguguuugaggucccuucucugagcaugauggcaauucugagg
chr14_32477	589	chr14_32477	589	157	126	101	76	63	66	5.76	6.54	5.22	4.58	4.34	4.45	gagcaugauggcaauucugagg	ucauauugaugaucuguguuugaggucccuucucugagcaugauggcaauucugagg
chr17_38139	587	chr17_38139	587	151	166	129	41	49	51	5.54	8.62	6.66	2.47	3.38	3.44	uugguccccuucaaccagcugu	agcugguaaaauggaaccaaaucaacuguugaauggauuugguccccuucaaccagcugu
chr6_17898	587	chr17_38139	587	151	166	129	41	49	51	5.54	8.62	6.66	2.47	3.38	3.44	uugguccccuucaaccagcugu	agcugguaaaauggaaccaaaucaacuguugaauggauuugguccccuucaaccagcugu
chr7_19107	587	chr17_38139	587	151	166	129	41	49	51	5.54	8.62	6.66	2.47	3.38	3.44	uuugguccccuucaaccagcu	agcugguaaaauggaaccaaaucaacuguugaauggauuugguccccuucaaccagcugu
chrX_40913	583	chrX_40913	583	103	159	149	51	49	72	3.78	8.26	7.7	3.08	3.38	4.85	aaaagugcuuacagugcagguag	aaaagugcuuacagugcagguagcuuuuugagaucuacugcaaugcaagcacuucuu
chr5_12966	572	chr12_28503	572	126	242	162	12	14	16	4.62	12.57	8.37	0.72	0.96	1.08	uagguaguuucauguuguugg	uagguaguuucauguuguugggccuggauuucugaacacaacgacauuaaaccacccga
chr12_28503	572	chr12_28503	572	126	242	162	12	14	16	4.62	12.57	8.37	0.72	0.96	1.08	uagguaguuucauguuguugg	uagguaguuucauguuguugggccuggauuucugaacacaacgacauuaaaccacccga
chr12_28504	572	chr12_28503	572	126	242	162	12	14	16	4.62	12.57	8.37	0.72	0.96	1.08	uagguaguuucauguuguugg	uagguaguuucauguuguugggccuggauuucugaacacaacgacauuaaaccacccga
chr5_12965	572	chr12_28503	572	126	242	162	12	14	16	4.62	12.57	8.37	0.72	0.96	1.08	uagguaguuucauguuguugg	uagguaguuucauguuguugggccuggauuucugaacacaacgacauuaaaccacccga
chr14_32867	569	chr14_32867	569	119	110	109	79	75	77	4.37	5.71	5.63	4.77	5.17	5.19	gacagaucucuccucccacagc	ugguggggagagagaagugacaggaucucaugagaucagaccaucugacagaucucuccucccacagc
chr10_25240	567	chr10_25240	567	87	80	64	240	55	41	3.19	4.15	3.31	14.48	3.79	2.76	uagagguuaggauucggca	uagagguuaggauucggcauuuucacugcagcagcccugguucaaucccuggu
chr12_28290	547	chr12_28290	547	102	105	129	67	72	72	3.74	5.45	6.66	4.04	4.96	4.85	agacgcagcucggauccugu	ccggcguugcugcgagcugugguguagaucacagacgcagacgcagcucggauccugu
chr11_26720	547	chr11_26720	547	101	83	124	77	74	88	3.71	4.31	6.41	4.64	5.1	5.93	uguguggcuaagugguagauuu	aucuuccacuuagccacacgugggccuuuuacucugcauguguggcuaagugguagauuu
chr10_25283	535	chr10_25283	535	88	83	112	98	79	75	3.23	4.31	5.79	5.91	5.45	5.05	ucguggucacugucgcucuccagg	uggugcguaguggucggggggcgaucuggaccugagcagaggucacugucggcucguggucacugucgcucuccagg
chr10_25284	535	chr10_25283	535	88	83	112	98	79	75	3.23	4.31	5.79	5.91	5.45	5.05	ucguggucacugucgcucuccagg	uggugcguaguggucggggggcgaucuggaccugagcagaggucacugucggcucguggucacugucgcucuccagg
chr3_9190	529	chr10_25872	529	65	70	98	103	97	96	2.39	3.64	5.06	6.21	6.69	6.47	agcuggucugggaguuccc	gaacuaagauucagcagcuggucagggcagcuggucugggaguuccc
chr10_25872	529	chr10_25872	529	65	70	98	103	97	96	2.39	3.64	5.06	6.21	6.69	6.47	agcuggucugggaguuccc	gaacuaagauucagcagcuggucagggcagcuggucugggaguuccc
chrX_39902	519	chrX_39897	519	137	134	120	52	48	28	5.03	6.96	6.2	3.14	3.31	1.89	uaauccuugcuaccugggugagagu	uaauccuugcuaccugggugagagugcugugugaaugcaaugcaccugggcaaggauucuga
chr12_29005	517	chr12_29005	517	73	161	180	37	26	40	2.68	8.36	9.3	2.23	1.79	2.69	uagcagcacagaaauauuggc	uagcagcacagaaauauuggcaccgggcggagagucugccaguauuggcugugcugcccca
chr9_23986	517	chr9_23986	517	102	83	135	61	69	67	3.74	4.31	6.97	3.68	4.76	4.51	uagcuguggacaugaccaua	uauggucauuaccaaggcucuuagaaugcaguuucucauuagcuguggacaugaccaua
chr5_12671	512	chr5_12671	512	81	56	62	110	73	130	2.97	2.91	3.2	6.64	5.03	8.76	acgcccuucccccccuucuuc	aggagggaggagaugggccaaguucccucugccuggaacgcccuucccccccuucuuc
chr14_33268	510	chr14_33267	510	204	93	83	42	49	39	7.49	4.83	4.29	2.53	3.38	2.63	cuuggcaccuagaaagcacua	gugguuguuaggaguuaaggcauauaaauaacuucagcuagcgcuuggcaccuagaaagcacua
chr14_33267	510	chr14_33267	510	204	93	83	42	49	39	7.49	4.83	4.29	2.53	3.38	2.63	cuuggcaccuagaaagcacua	gugguuguuaggaguuaaggcauauaaauaacuucagcuagcgcuuggcaccuagaaagcacua
chrAEMK02000452.1_41467	497	chrAEMK02000452.1_41467	497	133	182	93	36	22	31	4.88	9.45	4.8	2.17	1.52	2.09	uauguaauaugguccacgucu	augguugaccauaggacaugcgcugucucugugucguauguaauaugguccacgucu
chr3_9085	488	chr3_9085	488	78	56	90	81	86	97	2.86	2.91	4.65	4.89	5.93	6.54	uuggugugauguugguuuucugacc	uuggugugauguugguuuucugaccaaaaaaaaaaaaaaaaaugguuaccccuuuuugucagaaagaaauuaccagaa
chrAEMK02000452.1_41473	484	chrAEMK02000452.1_41473	484	137	116	113	44	39	35	5.03	6.02	5.84	2.65	2.69	2.36	uuugugaccugguccacuaac	ugguugaccagagagcacacgcuuuauuugugccguuugugaccugguccacuaac
chr3_7769	484	chr3_7769	484	72	96	154	55	47	60	2.64	4.99	7.96	3.32	3.24	4.04	ggggaacucccagaccagcuuc	ggggaacucccagaccagcuuccacucccuucaagaagcuggucugggaguuccc
chr5_13700	483	chr5_13700	483	86	39	84	85	108	81	3.16	2.03	4.34	5.13	7.44	5.46	ccauuccuucgucugugcacuaga	ccauuccuucgucugugcacuagaaaaauaacaguaccuagggcacaggaugggaugagg
chr3_9633	482	chr3_9633	482	90	57	56	111	92	76	3.3	2.96	2.89	6.7	6.34	5.12	uggucagcacucuggacu	uggucagcacucuggacuccucuccaugcugucagag
chr10_25335	474	chr10_25335	474	94	128	143	47	23	39	3.45	6.65	7.39	2.84	1.59	2.63	augaccuaugaauugacagaca	augaccuaugaauugacagacaauguggcuaaaucugucugucauuucuguaggccaaua
chr10_25336	474	chr10_25335	474	94	128	143	47	23	39	3.45	6.65	7.39	2.84	1.59	2.63	augaccuaugaauugacagaca	augaccuaugaauugacagacaauguggcuaaaucugucugucauuucuguaggccaaua
chrAEMK02000452.1_41512	467	chrAEMK02000452.1_41512	467	149	119	110	45	24	20	5.47	6.18	5.68	2.71	1.65	1.35	gguugaucagagaacauacauu	gguugaucagagaacauacauuuucucaaugauguaugucaacugauccacagu
chr2_6256	465	chr2_6256	465	69	145	150	31	35	35	2.53	7.53	7.75	1.87	2.41	2.36	cagugcaauguuaaaagggcauu	gcucuuuucacauugugcuacugucugcaccuaucacuagcagugcaauguuaaaagggcauu
chr2_4242	463	chr2_4242	463	109	107	114	55	43	35	4	5.56	5.89	3.32	2.96	2.36	agcacuuacggauucuggggg	agcacuuacggauucugggggugugugcuccagcugcccucagcaucuuugggugaugu
chr14_34328	461	chr14_34328	461	56	76	110	90	72	57	2.06	3.95	5.68	5.43	4.96	3.84	acauuuuaaacuugaggacaga	uguccucaaguucaaaaugcuuguaugugccgugacacacaaauacaaacauuuuaaacuugaggacaga
chr13_31383	457	chr13_31383	457	33	39	41	65	147	132	1.21	2.03	2.12	3.92	10.13	8.89	uggacuucccguguggcua	uggacuucccguguggcuacauauauauauauaaauguauauauuuauauauauucaacuuaguuucagucacauggcccagcucaag
chr14_33987	450	chr14_33987	450	81	144	126	32	25	42	2.97	7.48	6.51	1.93	1.72	2.83	uuagggcccuggcuccaucucc	uuagggcccuggcuccaucuccuuuaggaaaaccuucuguggggagugggguuuugacccuaacc
chrAEMK02000452.1_41485	450	chrAEMK02000452.1_41485	450	105	75	100	75	42	53	3.85	3.89	5.17	4.52	2.89	3.57	aaacaaacauggugcacuucuu	gaagucgcccauguucuuuucgcuugauacgugacgaaacaaacauggugcacuucuu
chr15_36528	442	chr15_36528	442	136	53	47	72	65	69	4.99	2.75	2.43	4.34	4.48	4.65	auugaacuugucccggccuga	uggucgcauccgauuuuccuguaauugaacuugucccggccuga
chr12_28713	428	chr12_28713	428	99	91	101	41	51	45	3.63	4.73	5.22	2.47	3.52	3.03	gcucugacuuuauugcacuacu	gcucugacuuuauugcacuacuguacuuuacagcuagcagugcaauaguauugucaaagcauc
chrAEMK02000452.1_41539	425	chrAEMK02000452.1_41539	425	99	142	114	29	14	27	3.63	7.37	5.89	1.75	0.96	1.82	aauauuauacagucaaccucu	agguugccugugagguguucacuuucuauacgaugaauauuauacagucaaccucu
chr13_29793	422	chr13_29793	422	83	66	100	53	55	65	3.05	3.43	5.17	3.2	3.79	4.38	guggguuaaggaucugguguu	guggguuaaggaucugguguugccacaagcugugguguagguugcaggugcggcucggauccagcagugaugagguugugucugauuugacccccag
chr8_22262	419	chr8_22262	419	80	142	102	28	29	38	2.94	7.37	5.27	1.69	2	2.56	uggagaaaaaggcaguuccua	ggcucuccuuuuacuucccccauucguacuuggagacugauugcgagaaaugaaauggagaaaaaggcaguuccua
chr2_6926	419	chr2_6926	419	64	80	80	62	52	81	2.35	4.15	4.13	3.74	3.58	5.46	ugcugaccgcugcuccgacgcg	cgcgggcggcgggcgccucagucgggacagcugcggcagcagagaggaccgaggcugcugaccgcugcuccgacgcg
chrX_40873	388	chrX_40873	388	71	69	69	75	39	65	2.61	3.58	3.56	4.52	2.69	4.38	uccgucaaccauccagcuguuu	uccgucaaccauccagcuguuuggggugaugcaaacaaacaucugguugguugagaga
chr18_39004	380	chr18_39004	380	73	137	131	8	14	17	2.68	7.11	6.77	0.48	0.96	1.15	uagguaguuuccuguuguugg	uagguaguuuccuguuguugggauccaccuuucucucgacagcacgacacugccuuca
chr3_7781	377	chr3_7781	377	67	91	103	44	28	44	2.46	4.73	5.32	2.65	1.93	2.96	uaauuuuauguauaagcuagu	gagcuuauucauaaaaguacaguauaauccaguaaaccuguaauuuuauguauaagcuagu
chr2_5309	373	chr2_5309	373	69	42	65	79	55	63	2.53	2.18	3.36	4.77	3.79	4.24	uccggaggcagggacgag	gguggcugccuccagggaggggcaggagauccggaggcagggacgag
chr11_26769	359	chr11_26769	359	55	41	70	79	56	58	2.02	2.13	3.62	4.77	3.86	3.91	aucccacuggggccucca	aucccacuggggccuccaggauauguuguagaauacccagaaauca
chrX_40943	345	chrX_40943	345	111	51	62	41	45	35	4.07	2.65	3.2	2.47	3.1	2.36	agacccuggucugcacucuauc	agacccuggucugcacucuaucuguaugcuuacugaagggagcgcagggcaggguuucc
chr13_30002	342	chr13_30002	342	86	59	87	33	49	28	3.16	3.06	4.49	1.99	3.38	1.89	uuguuucuugcaugugcucugauu	uuguuucuugcaugugcucugauuucauaaauugauaagaaacagauguacugaagaaacuaga
chr11_26378	328	chr11_26378	328	96	76	69	30	27	30	3.52	3.95	3.56	1.81	1.86	2.02	acuuucccgggauuuggagcg	acuuucccgggauuuggagcgcuuccgcacgcgcuccuugucccgagaccgcga
chr12_29007	318	chr12_29007	318	45	95	93	22	20	43	1.65	4.93	4.8	1.33	1.38	2.9	cagcagcacacugugguuugua	cagcagcacacugugguuuguacggcacuguggccacguccaaaccacacugugguguuagagcgag
chr12_29008	318	chr12_29007	318	45	95	93	22	20	43	1.65	4.93	4.8	1.33	1.38	2.9	cagcagcacacugugguuugua	cagcagcacacugugguuuguacggcacuguggccacguccaaaccacacugugguguuagagcgag
chr9_24313	317	chr9_24313	317	71	75	97	21	27	26	2.61	3.89	5.01	1.27	1.86	1.75	uauggcuuuucauuccuauguga	uauggcuuuucauuccuaugugauuacuguuccaaacucauguagggcuaaaagccaugggc
chr2_6134	310	chr2_6134	310	88	64	39	35	26	58	3.23	3.32	2.01	2.11	1.79	3.91	auugaugaugaaaaccugagg	acagguuuuuuuuuuuuuuuuuuucccuggguucuuugugggauggaggcauugaugaugaaaaccugagg
chr16_36897	308	chr16_36897	308	55	64	69	45	37	38	2.02	3.32	3.56	2.71	2.55	2.56	aagaccgucugcugaacucagca	cuggguuccugggcgguccuggggaugacuuggcgccaagaccgucugcugaacucagca
chr1_828	306	chr1_828	306	51	95	83	37	16	24	1.87	4.93	4.29	2.23	1.1	1.62	augcugacauauuuacuagagg	augcugacauauuuacuagaggguaaaguuaacaaccuucuaguaagaguggcagucgaag
chr4_12420	303	chr4_12420	303	48	98	145	4	5	3	1.76	5.09	7.49	0.24	0.34	0.2	ucccagggcucugccucca	gucccuucaggugcuggguggggcugccacggucccuggggccgguggaaggcccaugucccagggcucugccucca
chr6_16549	303	chr6_16549	303	58	62	47	47	41	48	2.13	3.22	2.43	2.84	2.83	3.23	aggcgggcgccgggcucgugagga	aggcgggcgccgggcucgugaggaaugaaacacgcccacgagaaaccgcgucccgccagg
chr8_21127	295	chr8_21127	295	74	61	75	45	26	14	2.72	3.17	3.87	2.71	1.79	0.94	uucaacggguauuuauugagc	ucaauaaauguuuguugaauugagaugcguuaaauucaacggguauuuauugagc
chr7_20856	292	chr7_20856	292	37	74	63	45	47	26	1.36	3.84	3.25	2.71	3.24	1.75	cuuccugucuccuccuucccagu	agggagaggggagcaggcccuggaggucaccuggucaccuaacucuuccugucuccuccuucccagu
chr2_5936	291	chr2_5936	291	83	45	34	49	35	45	3.05	2.34	1.76	2.96	2.41	3.03	uagcagcggggggacuuacucu	aguagggccccuugccguugcugaguuaacugcccuuagcagcggggggacuuacucu
chr8_21923	287	chr8_21923	287	27	33	81	55	38	53	0.99	1.71	4.18	3.32	2.62	3.57	agcuggacuccgucucuuccuuu	aggaggagcagagcccagaucuucgugcugugaagcuggacuccgucucuuccuuu
chr14_33206	280	chr14_33206	280	35	70	88	42	25	20	1.28	3.64	4.55	2.53	1.72	1.35	caggacgguggccaugga	caggacgguggccauggauucuuagccaaaggaaggacagggagauaugaucaaaugcgugcuggu
chr12_28400	275	chr12_28400	275	74	68	42	32	28	31	2.72	3.53	2.17	1.93	1.93	2.09	cacgugcgugcugguaucugg	agguaucauguguguguguguguguauagacgugcacacacgugcgugcugguaucugg
chr18_38906	270	chr18_38906	270	42	77	87	27	22	15	1.54	4	4.49	1.63	1.52	1.01	uuuggcacuagcacauuuuugcu	uuuggcacuagcacauuuuugcuugugucucuccgcucugagcaauuaugugcagugccaauau
chr6_16791	269	chr6_16791	269	74	62	36	38	37	22	2.72	3.22	1.86	2.29	2.55	1.48	uguggggccacgcccucaggcugu	uguggggccacgcccucaggcugucacuguccgauaccggccggaggcggggcuaccugggg
chr12_27324	262	chr12_27324	262	17	78	83	64	11	9	0.62	4.05	4.29	3.86	0.76	0.61	cugguggucuagugguuagc	cugguggucuagugguuagcauuccaugcuuccaccacuguggcccggggu
chr1_556	259	chr1_556	259	70	52	60	33	29	15	2.57	2.7	3.1	1.99	2	1.01	cuaaaugaugucagcugagg	cuaaaugaugucagcugagggccacuuagcguauggcauauguggugacuuaauccuguguuuaucguuuguc
chrAEMK02000452.1_41515	258	chrAEMK02000452.1_41515	258	35	51	35	39	56	42	1.28	2.65	1.81	2.35	3.86	2.83	gucauacacggcucuccucucu	agaggcuggccgugaugaauucgauucaucaaagcgagucauacacggcucuccucucu
chrAEMK02000452.1_41634	251	chrAEMK02000452.1_41633	251	13	7	8	115	42	66	0.48	0.36	0.41	6.94	2.89	4.45	cgggaacgucgagacuggagc	cgggaacgucgagacuggagcgcccgagccgagccaccuucgccgacccggagcgcugcggcucgacucaccgcg
chrAEMK02000452.1_41633	251	chrAEMK02000452.1_41633	251	13	7	8	115	42	66	0.48	0.36	0.41	6.94	2.89	4.45	cgggaacgucgagacuggagc	cgggaacgucgagacuggagcgcccgagccgagccaccuucgccgacccggagcgcugcggcucgacucaccgcg
chr6_15539	250	chr6_15539	250	54	64	40	31	38	23	1.98	3.32	2.07	1.87	2.62	1.55	aguucugugcggacucgccguc	cggugggguuucugcgccugucucuggcgguucccaguucugugcggacucgccguc
chr12_27038	246	chr12_27038	246	82	44	36	27	33	24	3.01	2.29	1.86	1.63	2.27	1.62	accaucggaggacgcgguagcuc	accaucggaggacgcgguagcucauccguugagcugaccaccgucgguucucuggugucc
chr2_5846	246	chr2_5846	246	39	52	81	22	24	28	1.43	2.7	4.18	1.33	1.65	1.89	uuccggucauugucuguacgug	uuccggucauugucuguacguggcgcgcuagugcuuuuccauuugcagcagugauaggauagc
chr6_15245	236	chr6_15245	236	18	67	66	20	31	34	0.66	3.48	3.41	1.21	2.14	2.29	uaacucuucccucucccugcag	acuggggaguuggagggaaagccgguuccgagcuaacucuucccucucccugcag
chr2_4157	233	chr2_4157	233	57	60	38	35	16	27	2.09	3.12	1.96	2.11	1.1	1.82	ucaugccggcucuuggcucagg	cggggcacggggcggcacgggcacaggcgcgugcucaugccggcucuuggcucagg
chr2_4158	233	chr2_4157	233	57	60	38	35	16	27	2.09	3.12	1.96	2.11	1.1	1.82	ucaugccggcucuuggcucagg	cggggcacggggcggcacgggcacaggcgcgugcucaugccggcucuuggcucagg
chr1_2289	232	chr1_2289	232	60	35	33	41	30	33	2.2	1.82	1.7	2.47	2.07	2.22	cacuagauugugaguuccuug	cacuagauugugaguuccuuggggacaaaagaugguaucuuuuaucuagauguucucaacuggcucaaagucagugcc
chr6_17174	229	chr6_17174	229	22	68	69	25	27	18	0.81	3.53	3.56	1.51	1.86	1.21	cuucucuguuacuucccucagg	uggagggagcagcaggggacgcaaggggcaaguggcuguggccugacucugcuucucuguuacuucccucagg
chrAEMK02000452.1_41570	229	chrAEMK02000452.1_41570	229	48	53	73	11	20	24	1.76	2.75	3.77	0.66	1.38	1.62	ugagcuaugacaggaacgccu	ugagcuaugacaggaacgccuauaaagauuguuuuuugauuuaggaguuccugucauggcu
chr2_5175	229	chr2_5175	229	35	41	62	26	39	26	1.28	2.13	3.2	1.57	2.69	1.75	ugagaugagagcccuuggccacu	uucccaucccagcuuggccuauuuguugagaugagagcccuuggccacu
chrAEMK02000452.1_41533	228	chrAEMK02000452.1_41533	228	65	83	52	7	8	13	2.39	4.31	2.69	0.42	0.55	0.88	aauaauacaugguugaucuuu	agaucgaccguguuauauucgcuuuauggacuucgaauaauacaugguugaucuuu
chr2_6722	224	chr2_6722	224	68	46	41	31	25	13	2.5	2.39	2.12	1.87	1.72	0.88	accaucgaccguugaguggacc	aacauucaaccugucggugaguuugggcagcucaggcaaaccaucgaccguugaguggacc
chr9_24493	217	chr9_24493	217	90	58	16	33	11	9	3.3	3.01	0.83	1.99	0.76	0.61	ucuggccgugguguagaccgg	ucuggccgugguguagaccggcagccacagcuccuauucuaccccuagccuga
chr3_7997	213	chr3_7997	213	34	80	73	1	13	12	1.25	4.15	3.77	0.06	0.9	0.81	aggaguuccugucguggcgccgu	ccacaacaggaaccccuauguguugucuuuuuaaaaacaaacuuuaggaguuccugucguggcgccgu
chr1_1815	213	chr1_1815	213	51	53	41	29	17	22	1.87	2.75	2.12	1.75	1.17	1.48	ucuggucuaugucuaucuccaac	ugauagaugaggccaaagaacgaaauacugaucuguccucucuggucuaugucuaucuccaac
chr1_1741	212	chr1_1741	212	54	37	22	44	24	31	1.98	1.92	1.14	2.65	1.65	2.09	acuagaaauuggguaggacaga	uguccuacccaauuucuagucccuaccuauucuagagacuagaaauuggguaggacaga
chr1_3752	212	chr1_1741	212	54	37	22	44	24	31	1.98	1.92	1.14	2.65	1.65	2.09	acuagaaauuggguaggacaga	uguccuacccaauuucuagucccuaccuauucuagagacuagaaauuggguaggacaga
chr18_39164	212	chr18_39163	212	9	54	83	17	17	32	0.33	2.8	4.29	1.03	1.17	2.16	gcaggacgguggccaugu	gcaggacgguggccaugucugcacucagccgggucuccagccugggg
chr18_39163	212	chr18_39163	212	9	54	83	17	17	32	0.33	2.8	4.29	1.03	1.17	2.16	gcaggacgguggccaugu	gcaggacgguggccaugucugcacucagccgggucuccagccugggg
chr7_19517	209	chr7_19517	209	93	50	28	15	14	9	3.41	2.6	1.45	0.9	0.96	0.61	ugggccugucauuuccucacu	caggggaaaggaugggucucggagcucgagccugggccugucauuuccucacu
chr12_28468	205	chr12_28468	205	51	37	53	24	16	24	1.87	1.92	2.74	1.45	1.1	1.62	uuuacguccuuucaccuaguuu	uuuacguccuuucaccuaguuuuuucuaugaaccugggugggaggacgugaaac
chr2_6806	204	chr2_6806	204	34	31	28	34	48	29	1.25	1.61	1.45	2.05	3.31	1.95	cugccuggaccccugcucaccgc	cuggggcggggguccugggccggggcugagcgugcucccugccuggaccccugcucaccgc
chr2_7429	204	chr2_7429	204	47	31	46	25	10	45	1.73	1.61	2.38	1.51	0.69	3.03	uugagacaauugagagaugauu	uugagacaauugagagaugauugcuaaauucauuauuuacaucucuuaauugucucaac
chr3_7951	202	chr3_7951	202	36	38	49	16	19	44	1.32	1.97	2.53	0.97	1.31	2.96	cuguggcucuggcguaggc	cucgcucagugaguuaagguuuuggcauugccgcaaguugugguguagguugcagauguggcucagauccagaguguagcuguggcucuggcguaggc
chr14_32296	200	chr14_32296	200	27	42	34	42	28	27	0.99	2.18	1.76	2.53	1.93	1.82	gcucugugaugaaccccc	gagggcggaguuugggaagcucugugaugaaccccc
chr12_28596	199	chr12_28596	199	57	53	25	29	15	20	2.09	2.75	1.29	1.75	1.03	1.35	uuggcccucuuuccuguccuagg	caggucugggugggugucaaggugguccacugucuccacaaggucucaccuuggcccucuuuccuguccuagg
chr5_13097	192	chr5_13097	192	44	39	57	17	24	11	1.61	2.03	2.94	1.03	1.65	0.74	ucauucuccuucuuugaccaga	ugggucagagaggaaggaugugauuugagcagaugguucucauucuccuucuuugaccaga
chr6_16473	192	chr6_16473	192	53	30	34	20	25	30	1.95	1.56	1.76	1.21	1.72	2.02	cuccgucccugccucccgcagg	aggcguggagccagggcagggcacugacagccgcucuccgucccugccucccgcagg
chrAEMK02000452.1_41532	191	chrAEMK02000452.1_41532	191	61	45	30	27	12	16	2.24	2.34	1.55	1.63	0.83	1.08	uggucgaccaguuggaaaguaau	uggucgaccaguuggaaaguaauuguuucgaauguacuucaccugguccacuagc
chrAEMK02000452.1_41520	191	chrAEMK02000452.1_41520	191	43	50	26	21	27	24	1.58	2.6	1.34	1.27	1.86	1.62	agaggucuuccauggugcauucg	agaggucuuccauggugcauucgcuuuauuuuuuuugacgaaucauacaugguugaccuuuuuu
chr17_38704	190	chr17_38704	190	58	38	34	22	21	17	2.13	1.97	1.76	1.33	1.45	1.15	ucaagguccgcugugaacacgc	ggcauucaccgcgugccuuaauuguauagacauuaaaucaagguccgcugugaacacgc
chr6_17341	188	chr6_17341	188	74	24	32	13	21	24	2.72	1.25	1.65	0.78	1.45	1.62	ucauguggcugugggaccucuguga	ucauguggcugugggaccucugugacgcacugaucuugggguccaggacccacaugcac
chr6_17342	188	chr6_17341	188	74	24	32	13	21	24	2.72	1.25	1.65	0.78	1.45	1.62	ucauguggcugugggaccucuguga	ucauguggcugugggaccucugugacgcacugaucuugggguccaggacccacaugcac
chr9_22943	185	chr9_22943	185	32	71	52	7	9	14	1.17	3.69	2.69	0.42	0.62	0.94	aaucacuaauuccacugccauc	aggcaguguaauuagcugauuguacucuggcgcuuacaaucacuaauuccacugccauc
chr4_10786	185	chr4_10786	185	32	30	44	36	26	17	1.17	1.56	2.27	2.17	1.79	1.15	uuuaaugaugauuuagcug	uuuaaugaugauuuagcugucucuuuagcaagaauaaagauaaauuuauuuuugguaacaagucagcacaaucuuuauugugcu
chr1_393	182	chr1_393	182	38	27	30	36	25	26	1.39	1.4	1.55	2.17	1.72	1.75	ucagugcacagcagaacuuu	gguuaacugcucuuuugugggucacagcacugaugugcuucagcccucagugcacagcagaacuuu
chr11_26416	180	chr11_26416	180	32	29	55	22	20	22	1.17	1.51	2.84	1.33	1.38	1.48	uccuggaggacgugcugugc	uccuggaggacgugcugugcccugugguucccuggggcuggcgggcccuccacgggg
chr11_26391	177	chr11_26391	177	34	35	35	30	26	17	1.25	1.82	1.81	1.81	1.79	1.15	uuccgugguguaugugcucgugc	gcacugcgcugagcgcugacggacgguuuccuucuucuuccuuccgugguguaugugcucgugc
chr8_22100	176	chr8_22100	176	82	48	8	31	5	2	3.01	2.49	0.41	1.87	0.34	0.13	ucuggcuguaguguagaccgg	uaggucacagacacugcucagaucccuccuugcucuggcuguaguguagaccgg
chr5_13792	174	chr5_13792	174	31	47	49	6	14	27	1.14	2.44	2.53	0.36	0.96	1.82	ucccuguccucuaggagcucaa	cuggggacacagggcagacagucccuguccucuaggagcucaa
chr8_21948	167	chr8_21948	167	20	25	37	20	38	27	0.73	1.3	1.91	1.21	2.62	1.82	gcgugcugcaccaccuccuggagg	cccgggaggugguggaguccagcuccgaguacgugcugcugagcgugcugcaccaccuccuggagg
chr9_24115	166	chr9_24115	166	19	30	41	28	28	20	0.7	1.56	2.12	1.69	1.93	1.35	ugcucucuggguucaugcucugg	ugcucucuggguucaugcucuggguuugaguaugugccgguaaacccagugaugcccaggggagugcc
chr8_21980	166	chr8_21980	166	20	40	30	28	21	27	0.73	2.08	1.55	1.69	1.45	1.82	agccagguggaugcggacgagc	ucgcccgcacccagccuggucucggccccagcaagagccagguggaugcggacgagc
chr1_1990	164	chr1_1990	164	38	56	53	5	5	7	1.39	2.91	2.74	0.3	0.34	0.47	gcugagccacaacgggaacucc	auucuggucagguucauuacugcugagccacaacgggaacucc
chr2_5882	164	chr2_5882	164	17	42	34	33	14	24	0.62	2.18	1.76	1.99	0.96	1.62	aggacgggaagagaggagggcgu	aggacgggaagagaggagggcgugguuucugcugguccucacuccucuccucccgucuucc
chr14_33535	163	chr14_33535	163	30	40	26	14	27	26	1.1	2.08	1.34	0.84	1.86	1.75	ugaaggcuggccuagaaaucucu	ugaaggcuggccuagaaaucucugggucugcauuuucacaggcuucuugugccagcacuugcu
chr6_16399	162	chr6_16399	162	36	29	29	29	15	24	1.32	1.51	1.5	1.75	1.03	1.62	ugguguacuucgcagaugcagc	ugguguacuucgcagaugcagcucagaaccuguguuacucuagcugugguguagaccu
chrAEMK02000682.1_41839	158	chrAEMK02000682.1_41839	158	37	49	29	8	19	16	1.36	2.54	1.5	0.48	1.31	1.08	auggugaguguggacgug	auggugaguguggacgugucucgugcauccucucuaccc
chr4_12494	157	chr4_12494	157	45	43	40	14	7	8	1.65	2.23	2.07	0.84	0.48	0.54	cggcucugggucuguggggagc	cccccucaguccaccagagcccggaugccucagaaauucggcucugggucuguggggagc
chr8_22569	150	chr8_22569	150	23	29	63	7	19	9	0.84	1.51	3.25	0.42	1.31	0.61	acgcgcugccuuugagcccccg	acgcgcugccuuugagcccccguugcgccugcgcguggcgccgggggucaggcugcagcgccaga
chr6_18226	149	chr6_18225	149	39	27	25	11	24	23	1.43	1.4	1.29	0.66	1.65	1.55	uccgucgggggccuggcacaca	uccgucgggggccuggcacacagugauguccgauccacgcucacggcagugaggguguuggcugccuaccuguggcagggcaccgcggagc
chr6_18225	149	chr6_18225	149	39	27	25	11	24	23	1.43	1.4	1.29	0.66	1.65	1.55	uccgucgggggccuggcacaca	uccgucgggggccuggcacacagugauguccgauccacgcucacggcagugaggguguuggcugccuaccuguggcagggcaccgcggagc
chrX_40009	145	chrX_40009	145	60	45	8	27	3	2	2.2	2.34	0.41	1.63	0.21	0.13	cuuaucagguuguauuauaaug	uuacaauacaaccugauaagugcuguaacacuuaucagguuguauuauaaug
chr17_38450	145	chr17_38449	145	23	49	38	12	15	8	0.84	2.54	1.96	0.72	1.03	0.54	aaugaugccccuuagaguugag	aaugaugccccuuagaguugagcagugcaugagcuguacaacuguucuugacuguugucaacucuuggugcccagauga
chr17_38449	145	chr17_38449	145	23	49	38	12	15	8	0.84	2.54	1.96	0.72	1.03	0.54	aaugaugccccuuagaguugag	aaugaugccccuuagaguugagcagugcaugagcuguacaacuguucuugacuguugucaacucuuggugcccagauga
chr14_33592	145	chr14_33592	145	34	36	12	23	26	14	1.25	1.87	0.62	1.39	1.79	0.94	gacuaugauguaggcugaug	caugagcugugguguaagucacagauguggcuuggaucuggcguugcugugacuaugauguaggcugaug
chr12_28008	145	chr12_28008	145	22	30	42	19	13	19	0.81	1.56	2.17	1.15	0.9	1.28	uauccccauggagucuguugccc	uauccccauggagucuguugcccugggagcccuggcuccgaagcgucugucggggaagcaggcucuggggauuaac
chr6_14810	144	chr6_14810	144	65	21	20	9	18	11	2.39	1.09	1.03	0.54	1.24	0.74	ugccgugagcuguggugu	ugccgugagcugugguguggcccccagacacggcuuggauccccuguugcuguggcugugguggaggucggcagcucuggcgcc
chr2_6632	144	chr2_6632	144	11	29	30	21	30	23	0.4	1.51	1.55	1.27	2.07	1.55	uucccuccugcugguacuccc	gaguuaccaguuccagggcuggcugauugaacaguucccuccugcugguacuccc
chrX_40438	144	chrX_40438	144	55	18	20	13	14	24	2.02	0.93	1.03	0.78	0.96	1.62	caugccuugaguguaggaca	ucugauucaaccccuagucugggaaacucuacaugccuugaguguaggaca
chr8_21451	143	chr8_21451	143	27	26	26	27	20	17	0.99	1.35	1.34	1.63	1.38	1.15	acuggacuuguagucagaaggc	cacugagccacaagugaacuccuauuuuuauuaccaaugcauucagguaaaaaugacuggacuuguagucagaaggc
chrX_40169	143	chrX_40169	143	13	28	57	9	16	20	0.48	1.45	2.94	0.54	1.1	1.35	uauauauauauauguacguaug	uauauauauauauguacguauguguauaugaauguauacguagauauauauguauuu
chr16_36571	143	chr16_36571	143	8	4	4	40	45	42	0.29	0.21	0.21	2.41	3.1	2.83	uccggaugaugucauuucugaug	ucagggaucgaacucacauccucaugguuacuagucaggcucauaacccucugagccacagugggaacuccggaugaugucauuucugaug
chr16_36821	141	chr16_36821	141	39	32	18	23	20	9	1.43	1.66	0.93	1.39	1.38	0.61	cuaacucccguguacugcacug	ugugguacagggaguaaaggccaguuguauucuugcacagggcuaacucccguguacugcacug
chr14_34149	140	chr14_34149	140	42	45	16	24	8	5	1.54	2.34	0.83	1.45	0.55	0.34	ccuggacuuggagucagga	ccuggacuuggagucaggauaccugccuucaacucccaggu
chr1_3481	140	chr1_3481	140	31	45	31	10	9	14	1.14	2.34	1.6	0.6	0.62	0.94	aguggggaacccuuccaugagga	aguggggaacccuuccaugaggaguagaacacuccuuaugcaagauucccuucuac
chr7_18299	137	chr7_18299	137	27	14	7	23	48	18	0.99	0.73	0.36	1.39	3.31	1.21	ccuuucugcaggccucugcu	cacaggccaagagaggaagggccuuucugcaggccucugcu
chrX_40691	137	chrX_40691	137	20	28	32	18	20	19	0.73	1.45	1.65	1.09	1.38	1.28	cuccguuugccuguuuugcuga	cuccguuugccuguuuugcugacguucauuugacucauucucagcaaaauaagcaaauggaaaa
chr5_14301	137	chr5_14301	137	16	29	32	24	8	28	0.59	1.51	1.65	1.45	0.55	1.89	ucuccagugagacagucucugg	ucuccagugagacagucucuggugaacuggucuccagugacucacucccugguguac
chr12_27117	136	chr12_27117	136	42	25	38	16	8	7	1.54	1.3	1.96	0.97	0.55	0.47	uuugcaguaacaggugugaaca	uuugcaguaacaggugugaacauucuagcagcaguuugaugaucauguaugauacugcaaaca
chr3_8096	135	chr3_8096	135	44	42	45	3	1	0	1.61	2.18	2.32	0.18	0.07	0	gagguugguggugcugacg	gagguugguggugcugacguuggcucugcgaggucggcucaaggugggucuggauauugagcaggccugucagggcguugucacccacaccagga
chr10_25337	133	chr10_25337	133	25	29	35	15	17	12	0.92	1.51	1.81	0.9	1.17	0.81	uguaacagcgacuccaugugg	uguaacagcgacuccauguggacugugccccaauuuccaguggagaugcuguuaccuu
chr6_14743	131	chr6_14743	131	20	22	30	11	13	35	0.73	1.14	1.55	0.66	0.9	2.36	ugcguguccgugcugcucugugau	ccagcagggccacccacgcacacgucccgccuugucgugcguguccgugcugcucugugau
chr7_20570	126	chr7_20570	126	29	35	25	16	11	10	1.06	1.82	1.29	0.97	0.76	0.67	cgcuaucucacucuacccaagg	augggcaggugggagaagagcagucugcugacggcugcgcuaucucacucuacccaagg
chr16_37416	126	chr16_37416	126	27	30	25	14	16	14	0.99	1.56	1.29	0.84	1.1	0.94	auugaucauggaguauuugucu	acaaauacucuaugaucaauccacuuuagauucuuauacuaguggauugaucauggaguauuugucu
chr7_19909	126	chr7_19909	126	27	19	23	15	21	21	0.99	0.99	1.19	0.9	1.45	1.41	ucugguccagacacuguggagc	ucugguccagacacuguggagcugaagagaccaacacuucucaguguuugaaccagaagc
chr15_35422	126	chr15_35422	126	22	6	14	28	31	25	0.81	0.31	0.72	1.69	2.14	1.68	accggcccggggcugccucc	accggcccggggcugccuccauuuucucgggugguggaggcggccccggcccgguauc
chr1_2473	122	chr1_2473	122	23	16	20	18	22	23	0.84	0.83	1.03	1.09	1.52	1.55	aaacauuagaaugucugagug	aaacauuagaaugucugagugguuuacuugaaggcuccucuggcucucuaguguugcu
chr3_8254	120	chr3_8254	120	33	11	25	20	13	18	1.21	0.57	1.29	1.21	0.9	1.21	caggaaugaugcucggugacc	caggaaugaugcucggugaccucucgggugaugggggaggagaagacaauaucuuuugcuuuuggggguaggagcuuaguuuuauggg
chr4_12221	116	chr4_12221	116	24	27	14	23	15	13	0.88	1.4	0.72	1.39	1.03	0.88	gagaaaugaaggaaccugaucgug	gagaaaugaaggaaccugaucgugaagcugggagcagauucagaaucccacaggccgagcagcuuuguc
chr9_23760	116	chr9_23760	116	5	37	21	19	21	13	0.18	1.92	1.08	1.15	1.45	0.88	accgauuucuccugguguucaga	accgauuucuccugguguucagagucuguuuuugucuagcaccauuugaaaucgguu
chr6_17397	116	chr6_17397	116	19	14	18	17	31	17	0.7	0.73	0.93	1.03	2.14	1.15	ucggggaggcugugcagcgcgg	ucggggaggcugugcagcgcggcccgcucgccucagccccgcugcccuccugcacugccuccccagc
chr7_19870	115	chr7_19870	115	57	19	28	2	3	6	2.09	0.99	1.45	0.12	0.21	0.4	cccggggccgagggagca	aucccagugcccguagcgggggucgcccggggccgagggagca
chr2_5884	115	chr2_5884	115	6	29	31	28	11	10	0.22	1.51	1.6	1.69	0.76	0.67	uguggugccugacgucuuggc	agggcugcaggcacugacauucacccaugguauuguggugccugacgucuuggc
chr12_28085	115	chr12_28085	115	17	18	29	18	16	17	0.62	0.93	1.5	1.09	1.1	1.15	cagggcaccggccucugcgug	cagggcaccggccucugcgugggacgcccucccgcgcugcagccugagcccucg
chr7_18886	113	chr7_18886	113	30	19	13	23	19	9	1.1	0.99	0.67	1.39	1.31	0.61	ugucaugcuggggaguguaguga	ugucaugcuggggaguguagugaacgucgucaugcuucucacugcuccccccgguguccggc
chr9_24241	110	chr9_24241	110	9	5	13	28	25	30	0.33	0.26	0.67	1.69	1.72	2.02	cuugaugaugcuggcugaug	cuugaugaugcuggcugauggcucaccaucuaugggggcucccggcccugguuacugagaggg
chr18_39341	109	chr18_39341	109	13	20	23	26	12	15	0.48	1.04	1.19	1.57	0.83	1.01	cgcuucuaggaaccacagacu	cgcuucuaggaaccacagacugcagccacugcugauguggcagggaaggcacaucuggcaaaggaagacuac
chr2_7402	106	chr2_7402	106	37	33	23	1	8	4	1.36	1.71	1.19	0.06	0.55	0.27	cugcccuggcccgagggaccgac	cggccccacgcaccaggguaagagagacucucgcuuccugcccuggcccgagggaccgac
chr2_5630	106	chr2_5630	106	29	35	15	17	5	5	1.06	1.82	0.77	1.03	0.34	0.34	uggcucauuucagcaggaag	uggcucauuucagcaggaaguuuuacugcagaugagacuagc
chr2_6484	106	chr2_6484	106	30	20	23	15	10	8	1.1	1.04	1.19	0.9	0.69	0.54	ugggggacugugaacagcgggg	ucguuggacacagaucacuacacugucauaacgcgaaagugggggacugugaacagcgggg
chr13_29620	105	chr13_29620	105	22	32	35	5	8	3	0.81	1.66	1.81	0.3	0.55	0.2	ugaaggucuacugugugccagc	ugaaggucuacugugugccagcccaagggcuaugacagcaaguucaaaucaauuuaauagccucuggcaugcuucccaaguuucccagg
chr6_17224	104	chr6_17223	104	19	29	14	19	10	13	0.7	1.51	0.72	1.15	0.69	0.88	caguuaccgcuuccgcuaccgc	caguuaccgcuuccgcuaccgccgccgcucccgcucuagcucccgcuccagcgagccgucgccgucgcgggacgcgucuccuggc
chr6_17223	104	chr6_17223	104	19	29	14	19	10	13	0.7	1.51	0.72	1.15	0.69	0.88	caguuaccgcuuccgcuaccgc	caguuaccgcuuccgcuaccgccgccgcucccgcucuagcucccgcuccagcgagccgucgccgucgcgggacgcgucuccuggc
chr4_10871	102	chr4_10871	102	23	13	10	13	24	19	0.84	0.68	0.52	0.78	1.65	1.28	uggccagcuguuuccucucuuu	agagagggggcugcuggcccuucggggaaagauggccagcuguuuccucucuuu
chr6_16379	101	chr6_16379	101	10	26	14	20	14	17	0.37	1.35	0.72	1.21	0.96	1.15	acagcgggggagugcucu	agugauuuugccccuaggagauauuugucaaugucugggcacauugcaauugucacagcgggggagugcucu
chr10_25365	100	chr10_25365	100	26	11	25	11	17	10	0.95	0.57	1.29	0.66	1.17	0.67	guuaaggaucuggcauug	guuaaggaucuggcauugucaccgcuguggcucgagucacugcuguguugaggguuugaucccuggccc
chr1_1287	99	chr1_1287	99	14	22	22	13	19	9	0.51	1.14	1.14	0.78	1.31	0.61	agaccggggaccggagcgagcaga	ccgcucgcucuuccucgguucuccccucccggcugaagaccggggaccggagcgagcaga
chr14_33025	96	chr14_33025	96	8	16	16	16	19	21	0.29	0.83	0.83	0.97	1.31	1.41	gcaacugauguucucauuucugagc	agaggagugauuaacgccugccgcugccugagcuuuguuugcaggaaaggucuuggcaacugauguucucauuucugagc
chr5_13393	94	chr5_13393	94	16	22	20	10	17	9	0.59	1.14	1.03	0.6	1.17	0.61	caacacugugcuggaagaugga	caucuuuaccagacaguguuaggagcuucacuauuagaccauccaacacugugcuggaagaugga
chrAEMK02000452.1_41609	94	chrAEMK02000452.1_41609	94	26	3	5	30	13	17	0.95	0.16	0.26	1.81	0.9	1.15	gacccuguccgccccuucccagg	uggggagggccggacagagcagccgaggcccgcugacccuguccgccccuucccagg
chr11_26867	94	chr11_26867	94	1	16	15	28	12	22	0.04	0.83	0.77	1.69	0.83	1.48	ugugcaucugguguaggaacg	ugugcaucugguguaggaacguguuucuaccagaagugacac
chr18_39309	92	chr18_39309	92	18	26	28	2	9	9	0.66	1.35	1.45	0.12	0.62	0.61	uuauggcccuucgguaauucacu	uuauggcccuucgguaauucacugaccgagacuguucacagugaauucuaccagugccauaca
chr14_33035	91	chr14_33035	91	18	28	18	5	10	12	0.66	1.45	0.93	0.3	0.69	0.81	aacgacacggucucauuuguggg	cacaaaugagaccgugucguuugcucaucaaacgacacggucucauuuguggg
chr2_5870	91	chr2_5869	91	22	10	19	15	10	15	0.81	0.52	0.98	0.9	0.69	1.01	ugccugcggcguguggacguu	ugccugcggcguguggacguucccaggccagggguugaaccugugccguagcggcacccgcgccgcggcugc
chr2_5869	91	chr2_5869	91	22	10	19	15	10	15	0.81	0.52	0.98	0.9	0.69	1.01	ugccugcggcguguggacguu	ugccugcggcguguggacguucccaggccagggguugaaccugugccguagcggcacccgcgccgcggcugc
chr2_6285	91	chr2_6285	91	16	14	14	22	9	16	0.59	0.73	0.72	1.33	0.62	1.08	cuggaccugucucuuccucagg	cuggaccugucucuuccucaggccccgggagagaugacucagcu
chr5_12666	90	chr5_12666	90	20	22	28	8	10	2	0.73	1.14	1.45	0.48	0.69	0.13	agggcgcaggggagcagg	agggcgcaggggagcaggacggggcgggcagucugcgugcacgcagggugcaauguuaucuguuccccgugugcccugg
chr14_34135	89	chr14_34135	89	17	36	11	16	6	3	0.62	1.87	0.57	0.97	0.41	0.2	ugucugcccgcaugccugccucu	ugucugcccgcaugccugccucucuguggcucugaaggaggcaggggcugggccugcagc
chr6_15658	89	chr6_15658	89	13	16	19	17	19	5	0.48	0.83	0.98	1.03	1.31	0.34	uccucuucuucccucugcaga	uccucuucuucccucugcagaugacaucaaggggaagagcggggaug
chr4_11555	89	chr4_11555	89	11	19	5	10	26	18	0.4	0.99	0.26	0.6	1.79	1.21	cggaggcguggaaggggg	cggaggcguggaagggggcacucguccaccugccaag
chr10_24824	86	chr10_24824	86	10	12	21	16	10	17	0.37	0.62	1.08	0.97	0.69	1.15	uucaggguccaggauugcuauagcu	uucaggguccaggauugcuauagcugcguuguagcuugcaacuguggcucggauccaaucccuggccccggaacu
chr12_28909	85	chr12_28909	85	24	18	18	6	14	5	0.88	0.93	0.93	0.36	0.96	0.34	agcugggcugcuguucucgaggu	agcugggcugcuguucucgagguaaugagccuuccccacgaggcugcagcccgcacc
chr12_28910	85	chr12_28909	85	24	18	18	6	14	5	0.88	0.93	0.93	0.36	0.96	0.34	agcugggcugcuguucucgaggu	agcugggcugcuguucucgagguaaugagccuuccccacgaggcugcagcccgcacc
chr3_7686	85	chr3_7686	85	9	13	11	17	29	6	0.33	0.68	0.57	1.03	2	0.4	aggcugggcgauccucgug	aggcugggcgauccucguguucucuccuuccaccagcacugugaugcugcgagggauguuucccacgggcacuuggucacucugg
chr15_35506	84	chr15_35505	84	9	22	25	8	13	7	0.33	1.14	1.29	0.48	0.9	0.47	ugggcacccugagguucugcggg	cucagaacucagcucugcucgccuggccuccaggccucagggcagcuggacgggguggggugggcacccugagguucugcggg
chr15_35505	84	chr15_35505	84	9	22	25	8	13	7	0.33	1.14	1.29	0.48	0.9	0.47	ugggcacccugagguucugcggg	cucagaacucagcucugcucgccuggccuccaggccucagggcagcuggacgggguggggugggcacccugagguucugcggg
chr12_28922	83	chr12_28922	83	16	27	27	2	7	4	0.59	1.4	1.39	0.12	0.48	0.27	uuuggucuuuucuccuuggcaga	ggcgagggagaaaugcuaaacucuucauacaagcauacguuuggucuuuucuccuuggcaga
chr3_8403	82	chr3_8403	82	23	13	22	15	6	3	0.84	0.68	1.14	0.9	0.41	0.2	ccgggccgggccugacucccagc	ggggcggggcggggcggggcggggcggggccgggccgggccgggccgggccgggccgggccgggccugacucccagc
chr7_20955	81	chr7_20955	81	16	21	20	14	4	6	0.59	1.09	1.03	0.84	0.28	0.4	uugcccgagagcuuggaccgc	uugcccgagagcuuggaccgcgcguugcaguggggugacgcgagguucagcccgggccucc
chr6_16488	81	chr6_16488	81	5	17	16	17	18	8	0.18	0.88	0.83	1.03	1.24	0.54	uucccauugagacugagcaucu	uguucagucucagugggaaccguguguaagucuuguucccauugagacugagcaucu
chr10_25225	80	chr10_25225	80	25	22	13	4	4	12	0.92	1.14	0.67	0.24	0.28	0.81	ugagccagccuguggggccga	uguuucacgggcuuugcuugcaguguuuucaaagucccucaagacugagccagccuguggggccga
chrAEMK02000452.1_41469	80	chrAEMK02000452.1_41469	80	21	13	13	11	4	18	0.77	0.68	0.67	0.66	0.28	1.21	uaggacacauggucuacuucu	augcgguugaccaugguguguacgcuuuauuuaugacguaggacacauggucuacuucu
chrAEMK02000452.1_41505	79	chrAEMK02000452.1_41505	79	21	17	9	9	15	8	0.77	0.88	0.46	0.54	1.03	0.54	aaucguacagggucauccacuu	gugguuaucccuguccuguucguuuuacucaugucgaaucguacagggucauccacuu
chr1_197	79	chr1_197	79	15	19	9	12	15	9	0.55	0.99	0.46	0.72	1.03	0.61	gaaaaugaugaguagugacugaug	acagcuaacacuucucacucucuguccauucauauugaaaaugaugaguagugacugaug
chr14_33039	79	chr14_33039	79	13	11	14	17	8	16	0.48	0.57	0.72	1.03	0.55	1.08	cgcggucgcccggggacu	gccccggcccggccucgcggccccgcacgucccggugccccagccgcagcggacgaggcgggagcgcggucgcccggggacu
chr14_33178	77	chr14_33178	77	9	37	22	3	5	1	0.33	1.92	1.14	0.18	0.34	0.07	uagggaacgugagcuggg	uagggaacgugagcugggagcuaaggucucagcuucugcccacggg
chr9_24775	77	chr9_24775	77	20	44	3	2	2	6	0.73	2.29	0.15	0.12	0.14	0.4	agcuacauugucagcugggg	agcuacauugucagcuggggcagagcccccacgcagguggcagcauauucc
chr15_34714	77	chr15_34714	77	3	7	14	16	16	21	0.11	0.36	0.72	0.97	1.1	1.41	cugucucucuguguccuga	cugucucucuguguccugagugcauacaacauuguucucccuguacguagagaccaag
chr12_28732	76	chr12_28732	76	23	23	12	7	7	4	0.84	1.19	0.62	0.42	0.48	0.27	caggacgaggggauugcgcugu	agcgggaccgcccugcgacagguucccggggggaacaggacgaggggauugcgcugu
chr5_14088	76	chr5_14088	76	19	15	11	13	9	9	0.7	0.78	0.57	0.78	0.62	0.61	ucccuuguguccuccucucagc	uggggggggcaccaggaaggacccugucacugacuucccuuguguccuccucucagc
chr12_28904	76	chr12_28904	76	13	11	12	15	9	16	0.48	0.57	0.62	0.9	0.62	1.08	ucacccacccccuucccuccagc	aggcggggagggguggcaagggggccgugugggcacagagggcaggccucacccacccccuucccuccagc
chr5_13663	75	chr5_13663	75	10	27	12	12	6	8	0.37	1.4	0.62	0.72	0.41	0.54	uuggagggcaagucuggu	caguaugugucaucccaggugaaauauuggagggcaagucuggu
chr4_10763	75	chr4_10763	75	29	17	7	3	10	9	1.06	0.88	0.36	0.18	0.69	0.61	ucaagguccgcugugaacacgg	gcauucaccgcgugccuuaauuguaugacauuaaaucaagguccgcugugaacacgg
chr6_16557	75	chr6_16557	75	28	4	19	5	7	12	1.03	0.21	0.98	0.3	0.48	0.81	cacagccgggcuggccucugggcu	cacagccgggcuggccucugggcucuggugcagaccuucagcgaagccagaccaggccggcugucg
chr9_23744	75	chr9_23744	75	18	11	8	9	14	15	0.66	0.57	0.41	0.54	0.96	1.01	ggcccugaugagagacugaag	ggcccugaugagagacugaagcccagagagggaaagcacuuuacccagggucac
chr3_8082	74	chr3_8082	74	29	20	24	0	0	1	1.06	1.04	1.24	0	0	0.07	ugggcgcgcgggucggggcg	ugggcgcgcgggucggggcgcugcugcuggcgcagcuguuggcgcgaguggaaaucgcgaggccgggugagcucagg
chr3_9497	74	chr3_8082	74	29	20	24	0	0	1	1.06	1.04	1.24	0	0	0.07	ugggcgcgcgggucggggcg	ugggcgcgcgggucggggcgcugcugcuggcgcagcuguuggcgcgaguggaaaucgcgaggccgggugagcucagg
chr3_9316	73	chr3_9316	73	29	6	11	7	17	3	1.06	0.31	0.57	0.42	1.17	0.2	ugcuuccuucugaacauuuugu	aaaauguucagaaggaagcagguuugaccaagcugcuuccuucugaacauuuugu
chr4_12126	73	chr4_12126	73	21	21	24	1	1	5	0.77	1.09	1.24	0.06	0.07	0.34	uuccugggggacuuggcucucuu	cagagccaaccucccaggaaguggcuccucucccuuccugggggacuuggcucucuu
chr13_31340	73	chr13_31340	73	17	5	11	10	16	14	0.62	0.26	0.57	0.6	1.1	0.94	ugggguguggggggugguc	uuguccuuccuuucucugccagcugggguguggggggugguc
chrAEMK02000452.1_41535	72	chrAEMK02000452.1_41535	72	20	26	14	3	8	1	0.73	1.35	0.72	0.18	0.55	0.07	aauauaacacagauggccugu	aggcugucugugaugaguucgcuuuaguaaugacgaauauaacacagauggccugu
chr6_17516	71	chr6_17516	71	11	10	8	5	18	19	0.4	0.52	0.41	0.3	1.24	1.28	uggcgauccggugcugcucucc	agggccgcagcggucguagaggccacacugacccaugcucuguggcgauccggugcugcucucc
chr13_31104	70	chr13_31104	70	10	23	10	10	8	9	0.37	1.19	0.52	0.6	0.55	0.61	uaccugugugcuuuccauccuuc	aggugguuugaguaaugggcgcauuaccugugugcuuuccauccuuc
chr5_14128	70	chr5_14128	70	14	10	13	12	5	16	0.51	0.52	0.67	0.72	0.34	1.08	ucugagaugugaccugggcauc	ugccuggguccccuccccagagguucaaauuuaauugcucugagaugugaccugggcauc
chr12_27343	68	chr12_27343	68	17	33	16	1	1	0	0.62	1.71	0.83	0.06	0.07	0	agcgcgcgggucgggggg	cccucuucgggaucucguuacuccaaaucucuaccgggaaaaaccagcgcgcgggucgggggg
chr2_6729	68	chr2_6729	68	23	20	17	2	0	6	0.84	1.04	0.88	0.12	0	0.4	ucagguauagcuggauccaggg	ucagguauagcuggauccaggggcucaaauaauagcaucaggauccaucugucccuaagg
chr4_11373	68	chr4_11373	68	7	20	5	13	8	15	0.26	1.04	0.26	0.78	0.55	1.01	ucagaaguggguccaggaaucu	uucccaggccgcacuucuagauccugauuuaacugaucagaaguggguccaggaaucu
chr6_16535	67	chr6_16535	67	22	20	22	0	0	3	0.81	1.04	1.14	0	0	0.2	uccugggagggcagagcccugag	uccugggagggcagagcccugagcugcuuccucuugccucagacccugccccuccugagaca
chr11_26191	66	chr11_26191	66	17	7	11	13	11	7	0.62	0.36	0.57	0.78	0.76	0.47	ugugcuuggcugaggaga	ccccaguucaguuacauguguugccaacagauuuuuaaugcaguaaaguucuaagcagcauugugcuuggcugaggaga
chr3_9179	65	chr3_9179	65	15	20	19	9	1	1	0.55	1.04	0.98	0.54	0.07	0.07	uuggcggccauggcggucucgga	uuggcggccauggcggucucggagcccggguaccggagcugguccuuguggcccgaggugccauccgccaccu
chr3_9180	65	chr3_9179	65	15	20	19	9	1	1	0.55	1.04	0.98	0.54	0.07	0.07	uuggcggccauggcggucucgga	uuggcggccauggcggucucggagcccggguaccggagcugguccuuguggcccgaggugccauccgccaccu
chr12_27050	65	chr12_27050	65	14	9	14	12	11	5	0.51	0.47	0.72	0.72	0.76	0.34	ugugggguucgguggccggu	ugugggguucgguggccggugucgguugccugugagccagcccccgcccccucacugcc
chr15_35609	65	chr15_35609	65	15	15	8	5	6	16	0.55	0.78	0.41	0.3	0.41	1.08	cccagugcucugaauguu	cccagugcucugaauguugugauuacucugagaugggaa
chrX_40243	64	chrX_40243	64	9	4	4	12	21	14	0.33	0.21	0.21	0.72	1.45	0.94	cccgagaagcgcacugccgagc	ugggccgugccuucucgaggggcccgucuccuuugcgugucacuugggggcccgagaagcgcacugccgagc
chr5_13081	63	chr5_13081	63	7	40	16	0	0	0	0.26	2.08	0.83	0	0	0	gacuggguggcugggaacguguacu	ugacgcccccccauucagauuucagggcucaagaugccgagaggcaucgccauugacuggguggcugggaacguguacu
chr18_39592	63	chr18_39592	63	13	2	13	10	8	17	0.48	0.1	0.67	0.6	0.55	1.15	uccgaccggcuggaggcugcu	caguccgagcgcggcgcggaggagagcgguugcuucucuccgaccggcuggaggcugcu
chr13_29552	62	chr13_29552	62	19	16	6	9	10	2	0.7	0.83	0.31	0.54	0.69	0.13	ugauuucugcccagugcuugg	ugauuucugcccagugcuuggggaacaaaucuucccuauguggaauaggcaggauaauuuuuu
chr2_5217	62	chr2_5217	62	18	12	9	12	8	3	0.66	0.62	0.46	0.72	0.55	0.2	caugugcucuggccccugcagu	uguguggggccagggaggacugccaggaugcucugucugaggcaugugcucuggccccugcagu
chr2_5218	62	chr2_5217	62	18	12	9	12	8	3	0.66	0.62	0.46	0.72	0.55	0.2	caugugcucuggccccugcagu	uguguggggccagggaggacugccaggaugcucugucugaggcaugugcucuggccccugcagu
chr6_16022	62	chr6_16022	62	19	10	3	11	7	12	0.7	0.52	0.15	0.66	0.48	0.81	agagacaggcggcuguaacucc	agagacaggcggcuguaacuccuucccugaacugagcaagaggugcagcggccugucccuggu
chrAEMK02000682.1_41827	61	chrAEMK02000682.1_41827	61	15	11	15	7	5	8	0.55	0.57	0.77	0.42	0.34	0.54	cagggagaagggcggccuuuggca	cuaggggccaccgucgcucccgcgcuguccucaggcuugaccagcagggagaagggcggccuuuggca
chr7_20534	61	chr7_20534	61	21	11	2	10	8	9	0.77	0.57	0.1	0.6	0.55	0.61	uuuccccucgcccauccccaga	uuggggaaggggguggggagaagggcacacgccucaggccggggucugacucugugcaccuuuccccucgcccauccccaga
chr10_25159	60	chr10_25159	60	15	18	5	3	14	5	0.55	0.93	0.26	0.18	0.96	0.34	aaccuugcuggagaucuugga	uggaucuccaggaaggcuggguguuggagaaccuugcuggagaucuugga
chr2_5059	60	chr2_5059	60	5	22	8	14	6	5	0.18	1.14	0.41	0.84	0.41	0.34	gaucccucugcuaucccccagc	ugggggacagcaggggcaucaguguggcugggguucugaucccucugcuaucccccagc
chr3_8274	60	chr3_8274	60	14	9	20	10	2	5	0.51	0.47	1.03	0.6	0.14	0.34	aacacaugugugcugaguggaacu	aacacaugugugcugaguggaacuacuuccugcuucaccaauuccacuccugacauguggacc
chrX_40174	60	chrX_40174	60	12	8	6	13	13	8	0.44	0.42	0.31	0.78	0.9	0.54	ucgaagcaaggauguggggggcuag	ucgaagcaaggauguggggggcuaguggugcagccucuauuagaccccaccucuuugcuuccagu
chr7_19151	59	chr7_19151	59	1	0	1	13	34	10	0.04	0	0.05	0.78	2.34	0.67	cuggacugggggaagacu	gcgacgccccuccgugucccucuggggccuggcaaagagcacagagccacagcuggacugggggaagacu
chrAEMK02000449.1_41883	59	chrAEMK02000449.1_41883	59	12	2	7	10	18	10	0.44	0.1	0.36	0.6	1.24	0.67	gagaaugaugauuucugauc	gagaaugaugauuucugauccucccaggaaauguucuaaa
chr1_2924	59	chr1_2924	59	16	5	12	4	6	16	0.59	0.26	0.62	0.24	0.41	1.08	aucugaauauagcuuauagug	cuguuugaaauagucaccuccugucucuuauauaguuggcccuugaacaauguggggauuaaucugaauauagcuuauagug
chr4_11313	58	chr4_11313	58	13	14	20	0	10	1	0.48	0.73	1.03	0	0.69	0.07	uuccucuggccccugcagcucu	accugcgcugcuuggggacagcgauggccguacacugccuuccucuggccccugcagcucu
chr9_22682	58	chr9_22682	58	7	14	10	8	16	3	0.26	0.73	0.52	0.48	1.1	0.2	acaggggugugaccaggaugac	acaggggugugaccaggaugacgugccgauucaggggaucuugccucagauaugccuuccugucucccucccugcagg
chr1_1155	58	chr1_1155	58	18	9	8	6	7	10	0.66	0.47	0.41	0.36	0.48	0.67	auuacuauggauucuuggcauu	ggccaagaauccacaguaauucagugaccagagagaauuacugaauuacuauggauucuuggcauu
chr6_15547	58	chr6_15547	58	16	7	12	7	6	10	0.59	0.36	0.62	0.42	0.41	0.67	ugcggagcuggucccgggaga	auacccggggcccggucugcaccgagggacggacgugcggagcuggucccgggaga
chr17_38180	57	chr17_38180	57	7	13	11	11	7	8	0.26	0.68	0.57	0.66	0.48	0.54	ucccggccccuucagacaccagcu	ucccggccccuucagacaccagcugagcccugucccgcuggugucuguuggccgca
chr7_20644	57	chr7_20644	57	10	8	17	7	7	8	0.37	0.42	0.88	0.42	0.48	0.54	agccacugcggaucccacucucu	aggguggggcugcgcgguggcgcuccuguccgcucugccgggagccacugcggaucccacucucu
chr13_30951	57	chr13_30951	57	17	5	12	5	7	11	0.62	0.26	0.62	0.3	0.48	0.74	ucggauuccgagggcggugcgg	ucggauuccgagggcggugcgggcagcucagguuucccccucucgcccuccgaguucagc
chr2_5593	56	chr2_5593	56	13	22	18	0	1	2	0.48	1.14	0.93	0	0.07	0.13	aaauggauuuuuggaauauga	guguuccgaguucuaauccaauaacauagaaauggauuuuuggaauauga
chr6_16282	56	chr6_16282	56	3	22	11	3	11	6	0.11	1.14	0.57	0.18	0.76	0.4	guggucugguggauaaaa	guggucugguggauaaaaagaaccuuggcuaggaucccaccc
chr11_26616	56	chr11_26616	56	15	27	1	3	3	7	0.55	1.4	0.05	0.18	0.21	0.47	cugcuggaggacgcccggugu	cccgugugccgugcuccagcguggugugggccacucagcucugcuggaggacgcccggugu
chr3_7838	56	chr3_7838	56	8	6	17	7	6	12	0.29	0.31	0.88	0.42	0.41	0.81	auucccuucugggccucaggauucc	auucccuucugggccucaggauucccuccaugcaaaagggccgggacucagagcggacaga
chr15_35004	56	chr15_35004	56	12	7	7	1	15	14	0.44	0.36	0.36	0.06	1.03	0.94	uaugugugagcaugggcuga	uaugugugagcaugggcugauuagucauuaguccaucccaauacauagu
chr1_655	54	chr1_655	54	18	14	12	3	5	2	0.66	0.73	0.62	0.18	0.34	0.13	uaccacagggcagaaccacgu	aaggucccugcccugauggaagucacacaggugggucaguggacccaggacuugcaacaggugauaccacagggcagaaccacgu
chrAEMK02000361.1_41768	54	chrAEMK02000361.1_41768	54	13	5	10	8	15	3	0.48	0.26	0.52	0.48	1.03	0.2	cgcacuuggcaucugguccuca	agcucccggugugagugggggcuuggccucucugugcccgcacuuggcaucugguccuca
chr11_26774	54	chr11_26774	54	3	18	19	3	6	5	0.11	0.93	0.98	0.18	0.41	0.34	acaccaacuaggacagaaaucauu	ugaauuucuuacuugguagcuagcucaagauggguacucuggaguugaaguuugaguuacaccaacuaggacagaaaucauu
chr1_48	54	chr1_48	54	7	3	7	6	11	20	0.26	0.16	0.36	0.36	0.76	1.35	gcuauggugguuugugua	gcuauggugguuuguguaaaggccauccugacacagcccucucccaccagccu
chr6_17356	53	chr6_17355	53	21	6	2	8	13	3	0.77	0.31	0.1	0.48	0.9	0.2	acuccggacugggcgggcgg	acuccggacugggcgggcggcggcggccuggccuugugcaggca
chr6_17355	53	chr6_17355	53	21	6	2	8	13	3	0.77	0.31	0.1	0.48	0.9	0.2	acuccggacugggcgggcgg	acuccggacugggcgggcggcggcggccuggccuugugcaggca
chr5_13601	53	chr5_13601	53	9	11	7	9	7	10	0.33	0.57	0.36	0.54	0.48	0.67	ggggguguagcucagucu	aaagcuucccugucccauaaaaugggcugauuuaucuauaauaggcuuacuggaggggguguagcucagucu
chr5_14033	52	chr5_14033	52	17	14	11	3	3	4	0.62	0.73	0.57	0.18	0.21	0.27	ugcguucauucuguuuggccugg	ugcguucauucuguuuggccugguguucuuucagcaggcgggacagcauggucgcagu
chr1_233	52	chr1_233	52	9	6	14	14	1	8	0.33	0.31	0.72	0.84	0.07	0.54	cuccaccucccugucuucugaga	uggggagaugcggaagguggagccggggacgcagaaagacuccaccucccugucuucugaga
chr2_4163	51	chr2_4163	51	5	12	18	8	4	4	0.18	0.62	0.93	0.48	0.28	0.27	ugacgccugcucuuccuccagc	ugggguggagggcgggccccgcagucccugugacgccugcucuuccuccagc
chr10_24915	51	chr10_24915	51	11	8	8	11	8	5	0.4	0.42	0.41	0.66	0.55	0.34	uacgaauuucaggaauacagca	cuguauuccugaaauucguaugaaucaguucaauugauacgaauuucaggaauacagca
chr10_25520	51	chr10_24915	51	11	8	8	11	8	5	0.4	0.42	0.41	0.66	0.55	0.34	uacgaauuucaggaauacagca	cuguauuccugaaauucguaugaaucaguucaauugauacgaauuucaggaauacagca
chr8_21889	51	chr8_21889	51	7	22	8	2	4	8	0.26	1.14	0.41	0.12	0.28	0.54	ucugggaaccgguuuugcugcu	cacacggcgcggcccgaggagccgccgugucggccccggguuucugggaaccgguuuugcugcu
chr16_37086	50	chr16_37086	50	11	15	13	1	8	2	0.4	0.78	0.67	0.06	0.55	0.13	uuggaagaacuaucagcugcau	uccugauaguucuuccaacugauuaguauuuucaguuggaagaacuaucagcugcau
chr1_735	50	chr1_2760	50	19	3	16	1	5	6	0.7	0.16	0.83	0.06	0.34	0.4	uaaaacuuagucgcugcucua	gagcagcgacuaaguuuuauauauauauaaaaaaauauaaaacuuagucgcugcucua
chr1_2760	50	chr1_2760	50	19	3	16	1	5	6	0.7	0.16	0.83	0.06	0.34	0.4	uaaaacuuagucgcugcucua	gagcagcgacuaaguuuuauauauauauaaaaaaauauaaaacuuagucgcugcucua
chr4_10965	50	chr4_10965	50	5	8	3	1	20	13	0.18	0.42	0.15	0.06	1.38	0.88	uccgucucugacccucacau	gugagucucagauggggaagcauaguggggcaaggaucuccgucucugacccucacau
chr6_16393	49	chr6_16393	49	3	6	5	10	18	7	0.11	0.31	0.26	0.6	1.24	0.47	ugcugugaugggggcucugaga	caagaguccaccccacggaguaagaagugcugugaugggggcucugaga
chr16_36573	49	chr16_36573	49	12	6	5	3	10	13	0.44	0.31	0.26	0.18	0.69	0.88	gaccugugaugaauugcugaga	uuugcagacacauggaguggauuacccaaugaccugugaugaauugcugaga
chr4_11364	48	chr4_11364	48	6	20	15	4	2	1	0.22	1.04	0.77	0.24	0.14	0.07	aacggaggccucuuaccagca	aacggaggccucuuaccagcaaauacgugagugaguggugcuggaagccaguccuccagucc
chr5_14557	48	chr5_14557	48	8	3	17	4	10	6	0.29	0.16	0.88	0.24	0.69	0.4	cgggagggcgggcaggcgg	cgggagggcgggcaggcgggagugagccaagugcccccggcc
chr3_10010	47	chr3_10010	47	4	11	16	9	2	5	0.15	0.57	0.83	0.54	0.14	0.34	gaaccaucucucuuauaucugc	gaaccaucucucuuauaucugccaccugccuucucugaccugcagauaugagaguguugguccuga
chr6_18112	47	chr13_31386	47	13	15	7	1	5	6	0.48	0.78	0.36	0.06	0.34	0.4	gucccugggcucugccucu	aggcuggcauguaacugauggguccuagaaaccccaggucccugggcucugccucu
chr13_31386	47	chr13_31386	47	13	15	7	1	5	6	0.48	0.78	0.36	0.06	0.34	0.4	gucccugggcucugccucu	aggcuggcauguaacugauggguccuagaaaccccaggucccugggcucugccucu
chr9_23124	47	chr9_23124	47	12	6	4	8	10	7	0.44	0.31	0.21	0.48	0.69	0.47	auggagaaucuggacucaagccc	auggagaaucuggacucaagccccacuucuaccacuuugugggcuuaagcuuuagguucuucagcc
chrAEMK02000452.1_41502	46	chrAEMK02000452.1_41502	46	4	9	3	21	9	0	0.15	0.47	0.15	1.27	0.62	0	uacgugggugcuggaaggucaga	uacgugggugcuggaaggucagagggaggggcuucugucucgguguguguccucugaccuuccugcaucccguuc
chr13_31052	46	chr13_31052	46	12	17	1	7	8	1	0.44	0.88	0.05	0.42	0.55	0.07	uuuucacuugcaggaucucuu	aagauccagcaguggagaaguaacacugaagacuuuucacuugcaggaucucuu
chrAEMK02000452.1_41509	46	chrAEMK02000452.1_41509	46	10	24	11	0	0	1	0.37	1.25	0.57	0	0	0.07	auaauacaugguuaaccucuuu	agagguuauccguguuauguucgcuucauucaucaugaauaauacaugguuaaccucuuu
chr18_39150	46	chr18_39150	46	17	7	10	7	3	2	0.62	0.36	0.52	0.42	0.21	0.13	cuuuucaccuucucuggcgcagg	ggggccagggaaggcggagccaaggcugauggggcuuuucaccuucucuggcgcagg
chr16_37308	46	chr16_37308	46	9	14	15	2	3	3	0.33	0.73	0.77	0.12	0.21	0.2	uaaccgguugaacaacugaacc	uuacaguuguucaaccaguuacuaaucuaacuaacuguaaccgguugaacaacugaacc
chr7_19160	46	chr7_19160	46	21	6	10	2	4	3	0.77	0.31	0.52	0.12	0.28	0.2	ucugguucugugacccugccu	ucugguucugugacccugccuauuugcccuucagccagguaagagcaucugaaccagggguuc
chr3_9740	46	chr3_9740	46	9	4	5	16	8	4	0.33	0.21	0.26	0.97	0.55	0.27	gagcagugaugaguagacugagg	gcagcucuccucauaggcauuuucugugacuuuuaaaaauaaaaggauuuuagaaagagcagugaugaguagacugagg
chr5_13488	46	chr5_13488	46	9	11	14	6	2	4	0.33	0.57	0.72	0.36	0.14	0.27	aaaugaaaaggauugguuucuc	aaaugaaaaggauugguuucucuuauguuccuaaugagaagucaauccuuuucguuuuu
chr4_12399	46	chr4_12399	46	3	9	9	9	6	10	0.11	0.47	0.46	0.54	0.41	0.67	ccgacccugagcccugccac	ccgacccugagcccugccacucccaacacuuagcucuuaaucagcucccugugagugagcauaauggguugacu
chr16_37581	45	chr16_37581	45	12	7	12	3	1	10	0.44	0.36	0.62	0.18	0.07	0.67	ccggagggacgggagccgcgcggg	ccggagggacgggagccgcgcgggaggcagacgcagggccgcgggcuccggccccccgcag
chr7_19348	45	chr7_19348	45	4	6	11	2	12	10	0.15	0.31	0.57	0.12	0.83	0.67	agucuugauucucuguuuuguu	agucuugauucucuguuuuguugguuugacuucugaaguauugcccaaaacagagaaucaagacuga
chr14_33765	44	chr14_33765	44	17	1	4	6	15	1	0.62	0.05	0.21	0.36	1.03	0.07	uccggccggccgggcucugccu	uccggccggccgggcucugccuaucauggugccgggccagcgaggggc
chr2_6306	44	chr2_6306	44	7	16	14	1	0	6	0.26	0.83	0.72	0.06	0	0.4	ccuccuccuuccacccuagucu	agagggaagagggaaggagggauaacguaggaaagagaucucccuccuccuuccacccuagucu
chr9_24361	44	chr9_24361	44	9	2	8	6	9	10	0.33	0.1	0.41	0.36	0.62	0.67	ucuugggccucaccccagauggacu	ucuugggccucaccccagauggacugaagcaggagcucuugggcugggcccagaaa
chr16_36993	43	chr16_36993	43	2	20	21	0	0	0	0.07	1.04	1.08	0	0	0	ugagacggaggugguggaggaaacc	cuuccugaacccccuuuucacuucccugcagcaacaggaagcccugccugaugagacggaggugguggaggaaacc
chr13_31525	43	chr13_31525	43	10	14	13	2	3	1	0.37	0.73	0.67	0.12	0.21	0.07	uggaagucugcuuguuuu	uggaagucugcuuguuuucaguucagucaaaaacaagaaagggcucuucu
chr15_36359	43	chr15_36359	43	12	12	15	1	1	2	0.44	0.62	0.77	0.06	0.07	0.13	ugggagcgggcgggcggu	ugggagcgggcgggcggugacucaccccgcacccgcc
chr17_38680	43	chr17_38680	43	1	11	12	2	11	6	0.04	0.57	0.62	0.12	0.76	0.4	cgcccucuggccucugccgcag	caggcagcggcccgggggggccgugccgacgcgcccucuggccucugccgcag
chr5_13099	43	chr5_13099	43	3	15	6	6	5	8	0.11	0.78	0.31	0.36	0.34	0.54	ucccugacuucuggcccccaga	agggggccacuagucacuggggagacacagcuacugucccugacuucuggcccccaga
chr14_33684	42	chr14_33684	42	8	15	16	1	2	0	0.29	0.78	0.83	0.06	0.14	0	ucaguuguguacuuccacucagc	uggguggugggccacgcugugaggugcagguugaccucaguuguguacuuccacucagc
chr12_28936	42	chr12_28936	42	16	5	20	0	0	1	0.59	0.26	1.03	0	0	0.07	acgaaggugcuggcgcucca	ggagcuccugcgccauccucccaggaaagugggacgaaggugcuggcgcucca
chr7_20296	42	chr7_20296	42	7	15	6	9	3	2	0.26	0.78	0.31	0.54	0.21	0.13	auuuucuugaaguuccuguugu	agcaggaacuccuugaaugaauuuuauuuuuuaaaaaauuuucuugaaguuccuguugu
chr14_33305	41	chr14_33305	41	24	11	5	0	0	1	0.88	0.57	0.26	0	0	0.07	gauuacagcuuuccuuuu	ggggcgcugugauuagacaugcgaccgccccgggaguggauuacagcuuuccuuuu
chr14_32931	41	chr14_32931	41	7	11	4	5	8	6	0.26	0.57	0.21	0.3	0.55	0.4	uggguugaauggcugguucuga	gagggccagcucugcaccccagcuuaagguguaacuggguugaauggcugguucuga
chr4_12237	41	chr4_11156	41	9	7	6	3	9	7	0.33	0.36	0.31	0.18	0.62	0.47	gcucuguccggcggacucucc	gcucuguccggcggacucucccauagcucggggaagggaggauguucgagccggcagaagc
chr4_11156	41	chr4_11156	41	9	7	6	3	9	7	0.33	0.36	0.31	0.18	0.62	0.47	gcucuguccggcggacucucc	gcucuguccggcggacucucccauagcucggggaagggaggauguucgagccggcagaagc
chr2_4851	41	chr2_4851	41	16	8	4	2	3	8	0.59	0.42	0.21	0.12	0.21	0.54	ucuggacaugaagccccucucu	caaggggcuucauguccagaccgggaagcucuggacaugaagccccucucu
chr2_5172	41	chr2_5172	41	6	4	0	9	11	11	0.22	0.21	0	0.54	0.76	0.74	uccugugaugaucucccugagc	uccugugaugaucucccugagccugggggcuauuggaagauccagcaucacc
chr5_13051	40	chr5_13051	40	1	21	17	0	1	0	0.04	1.09	0.88	0	0.07	0	acugauugcauggacucc	uggucugugcaucccccugcgguggcgcugcgauggggacacugauugcauggacucc
chr5_13052	40	chr5_13051	40	1	21	17	0	1	0	0.04	1.09	0.88	0	0.07	0	acugauugcauggacucc	uggucugugcaucccccugcgguggcgcugcgauggggacacugauugcauggacucc
chr13_30068	39	chr13_30068	39	10	10	8	4	7	0	0.37	0.52	0.41	0.24	0.48	0	gugaggacucgggagguggagggug	gugaggacucgggagguggaggguggcgcugccagggccagggcacugucucagcucgcuucuccccccaccuccucucuccucagg
chr4_10321	39	chr4_10321	39	15	15	5	2	1	1	0.55	0.78	0.26	0.12	0.07	0.07	uguuucggagccuggagcc	ugaccuguuuagcauaucgagaguguuucggagccuggagcc
chr18_39090	39	chr18_39090	39	10	8	11	3	2	5	0.37	0.42	0.57	0.18	0.14	0.34	gaaagcuggguugagagga	gaaagcuggguugagaggaaaggauguuugugcguuggcucgaggugacaucugugccuuuagccccucug
chr4_10987	39	chr4_10987	39	4	3	4	15	6	7	0.15	0.16	0.21	0.9	0.41	0.47	ucggcgccccacccucucuagc	gagagugggaggggugaggacugcccggcguuggcggagucggcgccccacccucucuagc
chr14_33891	38	chr14_33891	38	14	5	10	0	8	1	0.51	0.26	0.52	0	0.55	0.07	ccggaggaggaggagggggcgc	ccggaggaggaggagggggcgccgccgcuccccgccggcaccacgcgcgcccuccuccccccccaacc
chr6_17449	38	chr6_17449	38	3	13	7	8	5	2	0.11	0.68	0.36	0.48	0.34	0.13	acuggacuuggagccaga	acuggacuuggagccagaaauuaaggcucuaaaacugccugc
chr1_3971	38	chr1_3971	38	5	4	12	5	8	4	0.18	0.21	0.62	0.3	0.55	0.27	uacagucaacggucggugguuu	uacagucaacggucggugguuuuuucaaaucccaaacucaccgacagcguugaauguu
chr6_14764	38	chr6_14764	38	4	5	8	5	11	5	0.15	0.26	0.41	0.3	0.76	0.34	uguccugccaccgcucugagcc	uguccugccaccgcucugagccucggacccucucgggcgcggggcuguggcgggucugg
chr13_29546	38	chr13_29546	38	8	6	7	5	6	6	0.29	0.31	0.36	0.3	0.41	0.4	ccugagaacugagaggcugcuu	ccugagaacugagaggcugcuuuaagucccagagucuaaaagcagccucucaguucucaggcc
chr13_31115	38	chr13_29546	38	8	6	7	5	6	6	0.29	0.31	0.36	0.3	0.41	0.4	ccugagaacugagaggcugcuu	ccugagaacugagaggcugcuuuaagucccagagucuaaaagcagccucucaguucucaggcc
chr13_31199	37	chr13_31199	37	15	6	5	7	3	1	0.55	0.31	0.26	0.42	0.21	0.07	uccauuacacuacccugccucu	uccauuacacuacccugccucuucuccacgagaggcagcgggguguaguggaua
chr1_3289	37	chr1_3289	37	1	22	10	0	2	2	0.04	1.14	0.52	0	0.14	0.13	gauguggcucuggagggcgugaguc	gauguggcucuggagggcgugagucauuuucuccaugaauuugcaaaggagaagcaugagggcuccaagaucucuggaaaugcaaagg
chr12_29088	37	chr12_29088	37	11	10	7	5	0	4	0.4	0.52	0.36	0.3	0	0.27	uuuggccaucggaggacccaaga	ccugguccuccacuggccaacagaagauccaacagccccuuuggccaucggaggacccaaga
chr8_21094	37	chr8_21094	37	4	13	8	3	2	7	0.15	0.68	0.41	0.18	0.14	0.47	cggggggucgugugccugcggu	cggggggucgugugccugcggugcccccagcuugcucugggacugcccgucccgcgggcccaccacccuccacc
chrAEMK02000452.1_41603	37	chrAEMK02000452.1_41603	37	8	6	2	0	11	10	0.29	0.31	0.1	0	0.76	0.67	auuccggcggcgggggagggcgg	gcgcgaccggccggcccgggagccgcccugcccggaaaaaccggucgggccggcgcggcgcauuccggcggcgggggagggcgg
chr2_4443	37	chr2_4443	37	9	9	3	4	1	11	0.33	0.47	0.15	0.24	0.07	0.74	cgaggcagcgcugaggaugaac	ccacccucaucgcugccuguguguccacacuggagcacgaggcagcgcugaggaugaac
chr2_4628	37	chr2_4628	37	11	3	8	2	2	11	0.4	0.16	0.41	0.12	0.14	0.74	aagagggacguggcgcucugc	aagagggacguggcgcucugcgacgcgggcggcgaagccgcgccccuuccuucuuugg
chr3_10232	37	chr3_10232	37	5	2	3	12	4	11	0.18	0.1	0.15	0.72	0.28	0.74	cucccgccgccucccccgcagg	gccggggucgggggccuggggccgggguccgggucgcgcgcugaccgccgcucccgccgccucccccgcagg
chr16_37061	36	chr16_37061	36	8	10	16	0	2	0	0.29	0.52	0.83	0	0.14	0	gucccugggcccugccuccc	guuggccagggcguggaggccccugcugggcuggccccuguggggagggcuggccccaucucugucccugggcccugccuccc
chr9_23878	36	chr9_23878	36	5	9	9	6	6	1	0.18	0.47	0.46	0.36	0.41	0.07	cccugcugggguggaaccuga	uggcucuggccccaucaggagaccaggcauggccccugcugggguggaaccuga
chr7_19145	36	chr7_19145	36	14	5	5	7	3	2	0.51	0.26	0.26	0.42	0.21	0.13	uggacggagaacugauaagggu	ccuuaucacuuuuccagccagcuuugugacucuaaauguuggacggagaacugauaagggu
chr1_3109	36	chr1_3109	36	10	10	9	2	1	4	0.37	0.52	0.46	0.12	0.07	0.27	gacggcgcgcgccagcgacucuac	gacggcgcgcgccagcgacucuaccguguugacggugcguagggcggcggcgcgcgccggg
chr9_23064	35	chr9_23064	35	14	5	5	7	3	1	0.51	0.26	0.26	0.42	0.21	0.07	uugaggcgucgugcgccgggggc	uugaggcgucgugcgccgggggcauccaggacuaagagccugggcccggccgcuuccgccuugcuc
chr7_18360	35	chr7_18360	35	7	13	9	1	3	2	0.26	0.68	0.46	0.06	0.21	0.13	uucccugcccucuuccuccacu	uucccugcccucuuccuccacuuccacugagcaagcgggacacaggaugggcuguggguggggaagg
chr14_32890	35	chr14_32890	35	3	12	10	5	1	4	0.11	0.62	0.52	0.3	0.07	0.27	aaggaaagaauucuaguggggagu	aaggaaagaauucuaguggggaguagcuccuagggcuuuacuuacaaccugcuaauucuuucuuagc
chr15_35487	35	chr15_35487	35	10	8	7	3	1	6	0.37	0.42	0.36	0.18	0.07	0.4	ucacguccauggucagcaccgu	gggacugagcauggagcggaggccuucaucugucgccucacguccauggucagcaccgu
chrAEMK02000264.1_42095	35	chrAEMK02000264.1_42095	35	5	7	6	8	1	8	0.18	0.36	0.31	0.48	0.07	0.54	cuaguccugaauccucuucucu	ugguggggaugaggggucugagaagaucuaaggguuucuaguccugaauccucuucucu
chr13_29531	35	chr13_29531	35	3	4	7	3	5	13	0.11	0.21	0.36	0.18	0.34	0.88	uugggacugagacacggcc	cugugcgccguccuccguaucacacagauugggacugagacacggcc
chr13_29532	35	chr13_29531	35	3	4	7	3	5	13	0.11	0.21	0.36	0.18	0.34	0.88	uugggacugagacacggcc	cugugcgccguccuccguaucacacagauugggacugagacacggcc
chr3_8943	34	chr3_8943	34	6	10	7	9	2	0	0.22	0.52	0.36	0.54	0.14	0	gggaagguggcucaggcg	guugagcagcccgucuuuuccaccacagcggaaggccagggcccuugugcgcauacugaggggaagggaagguggcucaggcg
chr14_32823	34	chr14_32823	34	0	9	11	5	6	3	0	0.47	0.57	0.3	0.41	0.2	cucaggugggcagcugug	ccuuccuugcugagggcacucaggugggcagcugug
chrX_39896	34	chrX_39896	34	2	12	11	4	2	3	0.07	0.62	0.57	0.24	0.14	0.2	caucccuugcaugguggaggg	caucccuugcaugguggagggugagcuuucugaaaaccccucccacgugcaggguuugca
chr4_11065	34	chr4_11065	34	4	11	6	3	6	4	0.15	0.57	0.31	0.18	0.41	0.27	ugaccguggauuccucuccagg	ugggagggauccgaggaguggccaucgucaugcugaccguggauuccucuccagg
chr12_27145	34	chr12_27145	34	11	2	9	4	2	6	0.4	0.1	0.46	0.24	0.14	0.4	uuugucuuaaucucugugguuu	ucacagagauugagacaagguuguguuggaaccagcuuugucuuaaucucugugguuu
chr11_26935	34	chr11_26935	34	10	11	3	2	1	7	0.37	0.57	0.15	0.12	0.07	0.47	auagauugugagcuccuggaa	auagauugugagcuccuggaagagggaacuaguuauaguuuucuuuaguaucuagugggaugcugugc
chr17_37676	33	chr17_37676	33	8	13	3	2	7	0	0.29	0.68	0.15	0.12	0.48	0	uggaggggcuggaggccu	uggaggggcuggaggccugcggccgggggcuccagcucgcccucg
chr18_38924	33	chr18_38924	33	12	14	2	2	2	1	0.44	0.73	0.1	0.12	0.14	0.07	uugugucaauaugcgaugaugu	uugugucaauaugcgaugaugugugugauggcacagcgucaucacguggugacgcaaca
chr7_19265	33	chr7_19265	33	3	1	11	3	14	1	0.11	0.05	0.57	0.18	0.96	0.07	ugcucccgguaucugcgcucgag	ggagcgccgaggggagugagguugaggguacuugcucccgguaucugcgcucgag
chr2_6190	33	chr2_6190	33	1	19	5	3	0	5	0.04	0.99	0.26	0.18	0	0.34	cauucucugguggccuagcagg	ugccgggccaccagagaacuugucauugauauguggcauucucugguggccuagcagg
chr2_5239	33	chr2_5239	33	11	4	2	7	1	8	0.4	0.21	0.1	0.42	0.07	0.54	ccccugcaggcccugaccacucagc	cgggugcagcggggugggggaugugcgcaccccugcaggcccugaccacucagc
chr5_12611	33	chr5_12611	33	8	5	7	3	2	8	0.29	0.26	0.36	0.18	0.14	0.54	ugacucccggccugcuggcagg	ugcguagcaggcuggggcggcggccgcgggccagggccaggcacccugcugacucccggccugcuggcagg
chr14_33901	33	chr14_33901	33	7	6	5	3	3	9	0.26	0.31	0.26	0.18	0.21	0.61	gaagaugaugauuucgggucugauu	gaagaugaugauuucgggucugauuccacuguggcgccagagcgccaaguuucccaagguccucuucaggcugagauguuggcauccaaac
chr8_21129	32	chr8_21129	32	5	20	7	0	0	0	0.18	1.04	0.36	0	0	0	uuagagccagacugccugggu	cgaggcagccuggcuucauggcaagggaugaggcuuuagagccagacugccugggu
chrAEMK02000452.1_41495	32	chrAEMK02000452.1_41495	32	16	6	5	3	1	1	0.59	0.31	0.26	0.18	0.07	0.07	aucauagaggaaaauccacau	guagauuuuccuucuaugauuacguguuggaugguuaaucauagaggaaaauccacau
chr6_15569	32	chr6_15569	32	5	12	2	5	6	2	0.18	0.62	0.1	0.3	0.41	0.13	ucugaccgccucucccuccaga	uggggggcgggccgggcagaccuggggcucagccucugaccgccucucccuccaga
chr1_987	32	chr1_987	32	7	6	6	8	2	3	0.26	0.31	0.31	0.48	0.14	0.2	gggaggcuggcggccgcgcugac	ccgcgcgccccccagcugcccaaagcgcgcgccgggaggcuggcggccgcgcugac
chrX_40359	32	chrX_40359	32	10	4	0	4	10	4	0.37	0.21	0	0.24	0.69	0.27	ucuaaccucccgugcccccagg	cugggggcggggggcagggaacaggccaggccagcucugucuaaccucccgugcccccagg
chr17_37640	32	chr17_37640	32	12	2	9	3	1	5	0.44	0.1	0.46	0.18	0.07	0.34	augcccccaguugcugugucu	augcccccaguugcugugucucugcacguugaagccacaggggccgcg
chr2_6858	31	chr2_6858	31	4	4	13	4	6	0	0.15	0.21	0.67	0.24	0.41	0	ucuuccugccucucuccguag	cgggggagcgguuggagggcugggggcucagucuuccugccucucuccguag
chr6_14753	31	chr6_14753	31	5	5	0	7	13	1	0.18	0.26	0	0.42	0.9	0.07	cgccccgcgcuggcccugacc	gcgggggcgggggcggggagcuggcccccccgccccgcgcuggcccugacc
chr7_19286	31	chr7_19286	31	3	13	0	8	6	1	0.11	0.68	0	0.48	0.41	0.07	cacuuccuuccuuccuucagg	uagagggagggaaagagaagagguagaccagguaugaccacuuccuuccuuccuucagg
chr17_38141	31	chr17_38141	31	6	5	4	4	10	2	0.22	0.26	0.21	0.24	0.69	0.13	ccgaccucccguagcucacuu	gggcuacgggcuguccaggggaguggcugcggcccccgaccucccguagcucacuu
chr1_3375	31	chr1_3375	31	13	8	2	4	2	2	0.48	0.42	0.1	0.24	0.14	0.13	ucccugagacccaaacug	ucccugagacccaaacugcagcccugaccugucaagcccccaccccauggaguugagggagggauu
chr2_7471	31	chr2_7471	31	5	3	3	6	12	2	0.18	0.16	0.15	0.36	0.83	0.13	cuaccaugauguugcugagc	cuaccaugauguugcugagcaggauuuccugagcaugacugaggcauccgauguugcagagaagcccaaagucgga
chr2_7472	31	chr2_7471	31	5	3	3	6	12	2	0.18	0.16	0.15	0.36	0.83	0.13	cuaccaugauguugcugagc	cuaccaugauguugcugagcaggauuuccugagcaugacugaggcauccgauguugcagagaagcccaaagucgga
chr13_30066	31	chr13_30066	31	8	8	7	3	0	5	0.29	0.42	0.36	0.18	0	0.34	aggagcaggagucugggcuga	aggagcaggagucugggcugaggauuuuacuguacuuaauaccagccccuccuccagcuucaugg
chr15_34878	31	chr15_34878	31	7	5	8	1	2	8	0.26	0.26	0.41	0.06	0.14	0.54	ugagcauguagacaaauu	ugagcauguagacaaauuacuugcuguuguccauguuguac
chr12_27757	31	chr12_27757	31	8	3	3	1	6	10	0.29	0.16	0.15	0.06	0.41	0.67	ccgauggacgguccccacagg	agugggggccaggccauccggagcucacgccacccgauggacgguccccacagg
chr1_690	30	chr1_690	30	7	4	4	13	2	0	0.26	0.21	0.21	0.78	0.14	0	ugcugugccucgggucucuguugu	ugcugugccucgggucucuguugugguauugguucaaucccuggcccagaacuuccacaugccucaggcacagggga
chrX_40997	30	chrX_40997	30	2	21	7	0	0	0	0.07	1.09	0.36	0	0	0	ucaaaugcucagacuccugugg	ucaaaugcucagacuccugugguggcugcucaugcaccacggauguuugagcaugugcua
chrX_40998	30	chrX_40997	30	2	21	7	0	0	0	0.07	1.09	0.36	0	0	0	ucaaaugcucagacuccugugg	ucaaaugcucagacuccugugguggcugcucaugcaccacggauguuugagcaugugcua
chrX_40486	30	chrX_40486	30	9	9	3	3	5	1	0.33	0.47	0.15	0.18	0.34	0.07	uccgcacugggccuggcaca	ugcuccucccauugucagcagggucgcguccgcacugggccuggcaca
chr11_26445	30	chr11_26445	30	16	2	4	1	5	2	0.59	0.1	0.21	0.06	0.34	0.13	ugccgcgucggggccucgggcu	ugccgcgucggggccucgggcugcuggcggcuccacucaugucccaggcggccgcgagggggacgccggcggc
chr3_7674	30	chr3_7674	30	5	10	5	5	3	2	0.18	0.52	0.26	0.3	0.21	0.13	aggacgguggccauggacc	aggacgguggccauggaccugauuccaaguuuuucuguggaaacuuggcuucuccugguuaccagccugg
chr3_7676	30	chr3_7674	30	5	10	5	5	3	2	0.18	0.52	0.26	0.3	0.21	0.13	aggacgguggccauggacc	aggacgguggccauggaccugauuccaaguuuuucuguggaaacuuggcuucuccugguuaccagccugg
chr12_28353	30	chr12_28349	30	12	7	4	2	2	3	0.44	0.36	0.21	0.12	0.14	0.2	uggugcugggcacugcagagcugu	uggugcugggcacugcagagcuguggaugacaagagccagcuccugggcucggcacuucguc
chr12_28349	30	chr12_28349	30	12	7	4	2	2	3	0.44	0.36	0.21	0.12	0.14	0.2	uggugcugggcacugcagagcugu	uggugcugggcacugcagagcuguggaugacaagagccagcuccugggcucggcacuucguc
chr12_28355	30	chr12_28349	30	12	7	4	2	2	3	0.44	0.36	0.21	0.12	0.14	0.2	uggugcugggcacugcagagcugu	uggugcugggcacugcagagcuguggaugacaagagccagcuccugggcucggcacuucguc
chr12_28351	30	chr12_28349	30	12	7	4	2	2	3	0.44	0.36	0.21	0.12	0.14	0.2	uggugcugggcacugcagagcugu	uggugcugggcacugcagagcuguggaugacaagagccagcuccugggcucggcacuucguc
chr14_34200	30	chr14_34200	30	4	7	6	6	4	3	0.15	0.36	0.31	0.36	0.28	0.2	ugugccacuacgggaauuccu	uuccugucguggcgcagugguucuuagauuuguuuccacugugccacuacgggaauuccu
chr2_4288	30	chr2_4287	30	2	4	7	10	3	4	0.07	0.21	0.36	0.6	0.21	0.27	cuggcugggucccugagaggc	uccucucaggaucucagcccuccagacguaaaggaagaggcuggcugggucccugagaggcc
chr6_18283	30	chr6_18283	30	3	2	0	7	14	4	0.11	0.1	0	0.42	0.96	0.27	cuuugugaugguacugagagg	cuuugugaugguacugagagggggccauauucagcaggucugcaggcaguauuucuauuggggg
chr18_38744	30	chr18_38743	30	3	9	8	0	5	5	0.11	0.47	0.41	0	0.34	0.34	ggagaagccggcgggagc	ucccugugggacucugagucugucguggcuccuacagauguaggaggcagguggggaccugcaggagaagccggcgggagc
chr18_38743	30	chr18_38743	30	3	9	8	0	5	5	0.11	0.47	0.41	0	0.34	0.34	ggagaagccggcgggagc	ucccugugggacucugagucugucguggcuccuacagauguaggaggcagguggggaccugcaggagaagccggcgggagc
chr1_3500	30	chr1_3500	30	5	6	11	2	1	5	0.18	0.31	0.57	0.12	0.07	0.34	uauggaggguagacuguacuuc	uccaguuggcccuccagauucguagguauccuuggauauggaggguagacuguacuuc
chr12_27863	30	chr12_27863	30	3	5	1	9	3	9	0.11	0.26	0.05	0.54	0.21	0.61	ucugaagcaacaggaucugagg	gcauuuccugggcuccagaaagcucauauucuuccaucucugaagcaacaggaucugagg
chr2_4502	29	chr2_4502	29	7	11	5	3	2	1	0.26	0.57	0.26	0.18	0.14	0.07	ugcucucaccuuccaggcucugg	ugcucucaccuuccaggcucuggaugccauugaaagagcccaggaccuggccgaggagguggggaaca
chr3_8290	29	chr3_8290	29	5	7	13	1	2	1	0.18	0.36	0.67	0.06	0.14	0.07	uguuugaucccuggccucacucagu	gcauugugguucagugguuaauuaaccccauuaguauccacaaggacaggugguguuugaucccuggccucacucagu
chrAEMK02000452.1_41537	29	chrAEMK02000452.1_41537	29	10	2	6	8	2	1	0.37	0.1	0.31	0.48	0.14	0.07	cacaauacacggucggccucu	aggcugcccguggcccguccgcauuuuucaagacgcacaauacacggucggccucu
chr8_21314	29	chr8_21313	29	3	15	1	4	3	3	0.11	0.78	0.05	0.24	0.21	0.2	cacccuuuccugugcccuuuuaag	ugagagacaagugcaggaaaucuuagccccccaaaaugcgcaaaucacccuuuccugugcccuuuuaag
chr8_21313	29	chr8_21313	29	3	15	1	4	3	3	0.11	0.78	0.05	0.24	0.21	0.2	cacccuuuccugugcccuuuuaag	ugagagacaagugcaggaaaucuuagccccccaaaaugcgcaaaucacccuuuccugugcccuuuuaag
chr6_15036	29	chr6_15036	29	8	6	3	3	5	4	0.29	0.31	0.15	0.18	0.34	0.27	caggguucucagagggcuggagg	caggguucucagagggcuggaggugggucauauggucuccugccaucucagaaagcuuug
chr3_7834	29	chr3_7834	29	6	4	0	9	5	5	0.22	0.21	0	0.54	0.34	0.34	cugccgguggagggucucgcgac	cugccgguggagggucucgcgacaaaaagcagggccgacacgaggcggga
chr12_28830	29	chr12_28830	29	3	8	7	4	0	7	0.11	0.42	0.36	0.24	0	0.47	caagucuuuucaugaucugacc	ucagaucaugaaaagccuuucaggguuuuaaaauggcuggcaagucuuuucaugaucugacc
chr13_30956	29	chr13_30956	29	12	1	1	0	8	7	0.44	0.05	0.05	0	0.55	0.47	uggggcgguaggaauagcugc	ggcuagacuugcuagcccaggcugguguggauguagugguuuuggugagcugcugcacaggcaggguggggcgguaggaauagcugc
chr12_27850	29	chr12_27850	29	2	2	1	1	15	8	0.07	0.1	0.05	0.06	1.03	0.54	gaccauggcuguagacuguu	gaccauggcuguagacuguuaccuccgguucccacaguaacaaucgaaagccacgguugc
chr14_32715	28	chr14_32715	28	6	7	14	1	0	0	0.22	0.36	0.72	0.06	0	0	cugucuaacauguuagguuucuauu	uaggauuauguuuagaacugauaucucagaacugucuaacauguuagguuucuauu
chr12_29157	28	chr12_29157	28	1	3	0	14	8	2	0.04	0.16	0	0.84	0.55	0.13	ucuucccuccuuccugcugaac	ucuucccuccuuccugcugaacggaccaaggcugcugucagcucugggugggaggccg
chr7_18835	28	chr7_18835	28	5	1	7	6	5	4	0.18	0.05	0.36	0.36	0.34	0.27	gacccucgccgccaccucugcagg	ugcagguggagcccaggggaacagguagagcaagugacccucgccgccaccucugcagg
chr7_20946	28	chr7_20946	28	2	4	8	0	8	6	0.07	0.21	0.41	0	0.55	0.4	ugcagcugcaguacuagggccaca	auauccuuugcugcugcugcugcugcugcugcugcugcagcugcaguacuagggccaca
chr1_2092	28	chr1_2092	28	5	1	1	10	4	7	0.18	0.05	0.05	0.6	0.28	0.47	uuggggcgugcugggacaucuc	uuggggcgugcugggacaucucaggaugcacuggguugucucggggugcccuggga
chr8_21134	28	chr8_21134	28	7	1	6	6	0	8	0.26	0.05	0.31	0.36	0	0.54	uucagacccuggagaaaguuccuu	uucagacccuggagaaaguuccuuuugauagaugugggaaaggagccuuccaggucaugugac
chr1_1857	28	chr1_1857	28	3	1	0	8	7	9	0.11	0.05	0	0.48	0.48	0.61	guuuaugaugaggccccugaug	uccucauccucauuaucauaaccucgguuuaugaugaggccccugaug
chr10_24870	27	chr10_24870	27	10	11	6	0	0	0	0.37	0.57	0.31	0	0	0	ggggggagaagggucggg	ggggggagaagggucgggacggcggugagguggggcgcggggcgguuucagcgcgcggggcucccgggcacauuuccgucagg
chrX_40309	27	chrX_40309	27	5	1	4	12	5	0	0.18	0.05	0.21	0.72	0.34	0	agaggccagagggcaggacgcu	ugccugcccucccggcuccagcugccuccuccuaguccgcagaggccagagggcaggacgcu
chr5_14417	27	chr5_14417	27	9	8	7	0	2	1	0.33	0.42	0.36	0	0.14	0.07	ucuggcacauguucuaaccugucu	ucuggcacauguucuaaccugucuuguugucaugcuuacagaagguuagaugugcuggugg
chr6_17256	27	chr6_17256	27	6	4	7	4	4	2	0.22	0.21	0.36	0.24	0.28	0.13	gacuccugccccucucccacagg	gagagggggcagcgaccaggcagugggugauaggagaccccucaucuucugacuccugccccucucccacagg
chr2_6495	27	chr2_6495	27	4	1	6	2	11	3	0.15	0.05	0.31	0.12	0.76	0.2	augguugggaggauucucaga	augguugggaggauucucagaaaauaguuuccauagucugggaguccugccuggcuaacugu
chr2_6496	27	chr2_6495	27	4	1	6	2	11	3	0.15	0.05	0.31	0.12	0.76	0.2	augguugggaggauucucaga	augguugggaggauucucagaaaauaguuuccauagucugggaguccugccuggcuaacugu
chr1_3407	27	chr1_3407	27	6	0	5	2	9	5	0.22	0	0.26	0.12	0.62	0.34	ugcucugauccuuuuuuuuc	ugcucugauccuuuuuuuucaaaaagaagagugagaagcucaggcccaggu
chr6_17146	27	chr6_17146	27	5	8	3	3	3	5	0.18	0.42	0.15	0.18	0.21	0.34	uugucacuacuugagcucuggu	uggaguuccaugguggugcagaagguuaaggauccggccuugucacuacuugagcucuggu
chr3_9165	27	chr3_9165	27	1	3	8	3	4	8	0.04	0.16	0.41	0.18	0.28	0.54	auccugguccugcugcacaugagc	auccugguccugcugcacaugagcaggugacuagggcugcucugugcggggcccagagcgg
chr4_11993	26	chr4_11993	26	5	5	1	2	13	0	0.18	0.26	0.05	0.12	0.9	0	cuuggggaaugaagaagagucagc	cuuggggaaugaagaagagucagcauaacuucauagcaucuccucauucuuucucuucucucuccucagg
chr5_14370	26	chr5_14370	26	8	12	4	0	2	0	0.29	0.62	0.21	0	0.14	0	uaauacugccggguaaugaugga	cgucuuacccagcaguguuugggugcugcuugcgagucucuaauacugccggguaaugaugga
chr11_26498	26	chr11_26498	26	7	10	6	1	1	1	0.26	0.52	0.31	0.06	0.07	0.07	cugacucacucuguugugcagc	ugcacaacagagcgagccagcuggacgcggacacccugacucacucuguugugcagc
chr2_4849	26	chr2_4849	26	3	3	5	4	9	2	0.11	0.16	0.26	0.24	0.62	0.13	uacugugguguccugugucucugc	agagaccggggccacaagagcugagcccugccugcucgcugcuacugugguguccugugucucugc
chr2_4850	26	chr2_4849	26	3	3	5	4	9	2	0.11	0.16	0.26	0.24	0.62	0.13	uacugugguguccugugucucugc	agagaccggggccacaagagcugagcccugccugcucgcugcuacugugguguccugugucucugc
chr6_17834	26	chr6_17834	26	5	9	5	1	4	2	0.18	0.47	0.26	0.06	0.28	0.13	uuacagccgccugucucuggu	cagggacaggccgcugcaccucuugcucaguucagggaaggaguuacagccgccugucucuggu
chr2_4201	26	chr2_4201	26	8	4	6	1	4	3	0.29	0.21	0.31	0.06	0.28	0.2	uugugaucuggcaaauaucgucuu	gagaugccgauauuugccagaucacaaccagaaccucccugguugugaucuggcaaauaucgucuu
chr6_17054	26	chr6_17054	26	0	8	6	5	4	3	0	0.42	0.31	0.3	0.28	0.2	ugccgcucacucugcccucag	gggggcugugggaaggcauggggauagggucgggauggcccaagagcugcuuucugaucugccugccgcucacucugcccucag
chr6_18122	26	chr6_18122	26	10	3	5	2	2	4	0.37	0.16	0.26	0.12	0.14	0.27	cuggcgggugcaggcuuuuccga	gguuuagccgcucccucccgcguuccgccuuggagcuccgcuggcgggugcaggcuuuuccga
chr2_5062	25	chr2_5062	25	9	4	6	5	1	0	0.33	0.21	0.31	0.3	0.07	0	uucgcgucugggcuuugugugagc	uucgcgucugggcuuugugugagcgagcgggcugcgcggcgcugcgccugcgcgcucacaugacccggcgcgaccagu
chr16_37420	25	chr16_37420	25	11	6	0	5	2	1	0.4	0.31	0	0.3	0.14	0.07	augguaaugacugauuucuuuggg	cuaagaaauaggucauuaacaguaguuaacgauuacuugugaucuaugguaaugacugauuucuuuggg
chrX_40196	25	chrX_40196	25	3	4	11	4	2	1	0.11	0.21	0.57	0.24	0.14	0.07	acugggcuuggagucaga	acugggcuuggagucagacacaucugauuuugaguccaggcg
chr1_1892	25	chr1_1892	25	13	7	2	1	0	2	0.48	0.36	0.1	0.06	0	0.13	agauguccagccacaauucucg	agauguccagccacaauucucgguuggccgcagacucguacaagaauugcguuuggacaaucagu
chr7_19776	25	chr7_19776	25	11	3	4	4	0	3	0.4	0.16	0.21	0.24	0	0.2	uggucaaggccugucgccgcugu	uggucaaggccugucgccgcuguaugugcagcagcagcagcagcacacgcucaggccaca
chr1_657	25	chr1_657	25	5	5	8	0	2	5	0.18	0.26	0.41	0	0.14	0.34	acuggcugugguguagacca	gcuacaaaugcagcucagauaugguguugcacuggcugugguguagacca
chr13_29692	25	chr13_29692	25	8	1	2	2	6	6	0.29	0.05	0.1	0.12	0.41	0.4	cuccuggcuggcucucca	cuccuggcuggcucuccaaugccccaccuuuucuggacccugggcccuggugcuugcuguuggagcc
chr14_32698	25	chr14_32698	25	1	4	0	8	6	6	0.04	0.21	0	0.48	0.41	0.4	aagagugaugaugucugaaa	aagagugaugaugucugaaaaguuccuccaagacaggaugggcgauuucgagacagcacauuuaagc
chr6_14783	25	chr6_14783	25	7	5	4	0	1	8	0.26	0.26	0.21	0	0.07	0.54	uugcagugugcugaaaccucggc	ugagguuauggcaaacuggguuucagcaccuagcaaaauagagggcugauuuugcagugugcugaaaccucggc
chr5_13172	25	chr5_13172	25	2	2	1	3	8	9	0.07	0.1	0.05	0.18	0.55	0.61	gaggaaugaugucuggcugaca	gaggaaugaugucuggcugacacucacuguaaacacgaagcugucucccagaguucuuugc
chr1_1804	24	chr1_1804	24	5	6	3	9	1	0	0.18	0.31	0.15	0.54	0.07	0	ugcccaggaacacuguaagaug	ugcccaggaacacuguaagaugauauauauaucaucuuacaguguuccuggga
chr5_12626	24	chr5_12626	24	0	10	10	2	2	0	0	0.52	0.52	0.12	0.14	0	uccggucucagggcgcag	uccggucucagggcgcaggugcgugaugcccggggccgggcucgggcacccuuggggaauguggcugaguc
chr6_18270	24	chr6_18269	24	3	5	11	1	4	0	0.11	0.26	0.57	0.06	0.28	0	ucugcggcucgcgggcucccagc	ucugcggcucgcgggcucccagcccuccuccaggaccagcuccuucccgcgggccaccagc
chr6_18269	24	chr6_18269	24	3	5	11	1	4	0	0.11	0.26	0.57	0.06	0.28	0	ucugcggcucgcgggcucccagc	ucugcggcucgcgggcucccagcccuccuccaggaccagcuccuucccgcgggccaccagc
chr2_6709	24	chr2_6709	24	7	7	2	6	0	2	0.26	0.36	0.1	0.36	0	0.13	cggggcggcaggcugagccuc	cggggcggcaggcugagccucgacccaccgggugggggggcgcggaggcucauccuguugccuggac
chr3_8141	24	chr3_8141	24	2	7	2	6	4	3	0.07	0.36	0.1	0.36	0.28	0.2	uugugcuggggacguggcucgg	uggccgcgcccccggcacccuggcaugcacaaguuccuugugcuggggacguggcucgg
chr5_13089	24	chr5_13089	24	4	4	6	6	1	3	0.15	0.21	0.31	0.36	0.07	0.2	uguugcucucucccugguuaga	cacuagggggugagaaacaggccccucucauucuaccuucuguugcucucucccugguuaga
chr7_18325	24	chr7_18325	24	2	6	8	1	4	3	0.07	0.31	0.41	0.06	0.28	0.2	uccgggccugggucuccca	ggacagagcuggguucaacuccacccuccaacauuuaggguaaccuuaugggagacggguuccgggccugggucuccca
chr1_1437	24	chr1_1437	24	7	3	2	0	8	4	0.26	0.16	0.1	0	0.55	0.27	gagcaugaugauuacugacu	uauguauguggucguguuuuuugcgggggagcaugaugauuacugacu
chr1_2501	24	chr1_2501	24	2	3	6	3	6	4	0.07	0.16	0.31	0.18	0.41	0.27	acuggauuuggagucagau	acuggauuuggagucagaugaacuugauucaagccucagcucugcuaucuaguag
chr2_6140	24	chr2_6140	24	6	2	5	4	1	6	0.22	0.1	0.26	0.24	0.07	0.4	uccguccuguccucccuuccaga	ugguggggugggcagcccggccuucuggacucacgguccguccuguccucccuuccaga
chr15_34701	23	chr15_34701	23	0	12	5	0	6	0	0	0.62	0.26	0	0.41	0	cuguacuccagccugggc	gaaggcuuuggggguuggggcaggggugcagugacacaugggcacccugccuguacuccagccugggc
chr7_19154	23	chr7_19154	23	5	1	6	5	6	0	0.18	0.05	0.31	0.3	0.41	0	cgagggggauuggggacucauggau	cgagggggauuggggacucauggaugccuucugacucauggaucuccucucccagu
chr2_4771	23	chr2_4771	23	8	3	2	0	9	1	0.29	0.16	0.1	0	0.62	0.07	ccuccuuuuuucugugaacaga	uucacaguucauaggaggaugaauguguauccuccuuuuuucugugaacaga
chr3_9224	23	chr3_9224	23	6	10	4	1	1	1	0.22	0.52	0.21	0.06	0.07	0.07	ccgacgcggguggagcagccggc	uggacuggcgccgggaccuacucgagcgacgcggggagagcugcggucccgacgcggguggagcagccggc
chr4_12128	23	chr4_12128	23	0	2	18	1	1	1	0	0.1	0.93	0.06	0.07	0.07	ucugcuccuggcaggcugugugc	gcauggcaggugccggagcagugcugugcugguuuccagcucugcuccuggcaggcugugugc
chr6_17131	23	chr6_17131	23	1	5	8	3	5	1	0.04	0.26	0.41	0.18	0.34	0.07	ugggggcuugggcucuaggcaaga	ugggggcuugggcucuaggcaagagccccugaccucugcuugguguucacgccccagcu
chr16_37247	23	chr16_37247	23	11	9	0	0	0	3	0.4	0.47	0	0	0	0.2	uggcaguguauuguuagcugg	uggcaguguauuguuagcugguugaguauaugaguagcaucagcuaacaugcaacugcuguc
chr16_37248	23	chr16_37247	23	11	9	0	0	0	3	0.4	0.47	0	0	0	0.2	uggcaguguauuguuagcugg	uggcaguguauuguuagcugguugaguauaugaguagcaucagcuaacaugcaacugcuguc
chr2_6672	23	chr2_6672	23	2	14	4	0	0	3	0.07	0.73	0.21	0	0	0.2	ugcgugucucuaucccucacagc	ggugggggucugggcacuggguggcugaugagcgcaugcgugucucuaucccucacagc
chr6_17772	23	chr6_17772	23	2	5	10	0	2	4	0.07	0.26	0.52	0	0.14	0.27	aucugaccuugccgaccucgcag	gcggggucggggucggcucuagagggggagaaggaucugaccuugccgaccucgcag
chr7_18866	23	chr7_18866	23	4	7	1	7	0	4	0.15	0.36	0.05	0.42	0	0.27	ugcucugagggucuuugacgucu	ugcucugagggucuuugacgucugagaacuaauggaggaggagacccacagagcucc
chr14_33245	23	chr14_33245	23	14	0	1	0	3	5	0.51	0	0.05	0	0.21	0.34	uggaacuuggcugugucucu	ggaccggacaagucccgggugaguuugguccucuggaacuuggcugugucucu
chr4_12367	23	chr4_12367	23	5	4	2	3	4	5	0.18	0.21	0.1	0.18	0.28	0.34	agaaagaagccucucggccugug	agaaagaagccucucggccugugcuggcauaugcucuccgcagucgggacgcuuccuucuuga
chrX_40474	23	chrX_40474	23	3	4	7	0	2	7	0.11	0.21	0.36	0	0.14	0.47	cugggcgggcugggaggcgc	gccucucacuuuucccagggcggaugcgccugcgcucagcugccugggcgggcugggaggcgc
chr10_24946	22	chr10_24946	22	10	4	7	1	0	0	0.37	0.21	0.36	0.06	0	0	gagcugugaugagaauccucugagc	gagcugugaugagaauccucugagcccugcgacccugggaccucagcauucucugcaucacaaucgg
chr15_35504	22	chr15_35504	22	7	3	3	1	8	0	0.26	0.16	0.15	0.06	0.55	0	agugggcaggucccuggacaga	agugggcaggucccuggacagaggacagaggugggccuggaugcuggcugggcaccugcccaugg
chr1_1796	22	chr1_1796	22	11	2	1	6	2	0	0.4	0.1	0.05	0.36	0.14	0	ugaguuuccuguggguccuuggau	ugaguuuccuguggguccuuggaugugucugagcuggagaagauccaagaccaggggaaguucuca
chr1_3583	22	chr1_3583	22	11	3	8	0	0	0	0.4	0.16	0.41	0	0	0	uucccuuugucauccuaugccu	uucccuuugucauccuaugccugagaauauaugaaggaggcugggaaggcaaagggacgu
chr2_4773	22	chr2_4773	22	8	10	3	1	0	0	0.29	0.52	0.15	0.06	0	0	uggaucugacugcuuacacuuu	agugcagagcugacagccccacccaguugaaugaguggguggaucugacugcuuacacuuu
chr5_13091	22	chr5_13091	22	5	7	0	2	8	0	0.18	0.36	0	0.12	0.55	0	cauccugacuugugucucccgcauu	ugugggggaaucacaggcaggcaggccauugcuuugcauggccauccugacuugugucucccgcauu
chr15_35282	22	chr15_35282	22	1	8	6	3	3	1	0.04	0.42	0.31	0.18	0.21	0.07	uuuggauuucucuuguggcag	uuuggauuucucuuguggcagaguggguuaaaaacccagcuuugucauuacagcagccagaag
chr15_35486	22	chr15_35486	22	2	5	8	3	3	1	0.07	0.26	0.41	0.18	0.21	0.07	ugggaggacucacggaggaug	ugggaggacucacggaggaugcuggcaggggccaaagucuggcccuccguccgaccucccccg
chr3_9924	22	chr3_9924	22	8	6	7	0	0	1	0.29	0.31	0.36	0	0	0.07	gcuggugaugaauucugagg	aaaugauucaaacauaaaguagcaucuacugaggugcuggugaugaauucugagg
chr4_10828	22	chr4_10828	22	10	1	8	0	2	1	0.37	0.05	0.41	0	0.14	0.07	cugggcugagauugaugaccuc	cugggcugagauugaugaccuccaaagcuccuuucaacucugagguucagcaaaucucagcccucagcu
chr4_11727	22	chr4_11727	22	13	3	1	1	3	1	0.48	0.16	0.05	0.06	0.21	0.07	ugggaugaagcacugugg	ugggaugaagcacugugggcugugaugaugccuugcacagagcuuuaaaacacu
chrX_39936	22	chrX_39936	22	0	15	6	0	0	1	0	0.78	0.31	0	0	0.07	ccccagcuguaggcagcugccu	ccccagcuguaggcagcugccuagguuaccauguaucuaggcaaguguuacacugcugggaga
chrY_41091	22	chrY_41091	22	0	3	6	7	3	3	0	0.16	0.31	0.42	0.21	0.2	ucucuccagccucugcucugu	ucucuccagccucugcucuguggggacugagcaucaggagcgguggcuggggggaaa
chr1_1066	22	chr1_1066	22	0	7	1	0	5	9	0	0.36	0.05	0	0.34	0.61	gaggaugaugacagugacacugaca	gaggaugaugacagugacacugacaaggauggcaaacuuacugggucagaaacugcucucagugcuugaucucau
chr2_5298	22	chr2_5298	22	0	7	5	0	1	9	0	0.36	0.26	0	0.07	0.61	cgugugcugcccagaggcuggc	cgugugcugcccagaggcuggcugcguuguggugugucaggcucuuugcugugcacggc
chr3_9926	21	chr3_9925	21	0	3	8	2	8	0	0	0.16	0.41	0.12	0.55	0	ugagaggucgugagggcgugu	ugagaggucgugagggcgugugugagauaguucagcuuuuugaguucucccc
chr3_9925	21	chr3_9925	21	0	3	8	2	8	0	0	0.16	0.41	0.12	0.55	0	ugagaggucgugagggcgugu	ugagaggucgugagggcgugugugagauaguucagcuuuuugaguucucccc
chr3_9510	21	chr3_9510	21	2	2	7	7	2	1	0.07	0.1	0.36	0.42	0.14	0.07	ucagcgugccgucccccccaga	aggggggggcggcugggugcccuguggggucagcgugccgucccccccaga
chr6_15594	21	chr6_15594	21	2	3	3	5	7	1	0.07	0.16	0.15	0.3	0.48	0.07	agcuuuucugugagcucuuccu	agcuuuucugugagcucuuccuuagacugugggagcaggaagagcaacaagauaaagccgu
chr6_16605	21	chr6_16605	21	5	1	5	7	2	1	0.18	0.05	0.26	0.42	0.14	0.07	cugccuucuccacggacaccuc	cugccuucuccacggacaccuccguggcauuuuugagguguccauggagaagccagcc
chr8_21209	21	chr8_21209	21	7	2	2	3	6	1	0.26	0.1	0.1	0.18	0.41	0.07	cugaaugauggaugacugagg	ucagaaccaauuuaucauacauggucuuggguacagagcuaaugugucuguucacugcugaaugauggaugacugagg
chr18_38752	21	chr18_38752	21	5	7	7	0	0	2	0.18	0.36	0.36	0	0	0.13	ucuggacgcgagccgggc	ucuggacgcgagccgggcugccggcugcaccuugguggggaagcucgggcugcuuccgggcg
chr10_25055	21	chr10_25055	21	4	7	0	1	6	3	0.15	0.36	0	0.06	0.41	0.2	ucuucugugauuugaacugcugcu	ggaaaguugaaacacagaagugguguucucugucuuacagccucuucugugauuugaacugcugcu
chr16_37069	21	chr16_37069	21	3	11	3	1	0	3	0.11	0.57	0.15	0.06	0	0.2	caauccugcagaacacauucggc	ugauguguucuucuggguauuuuccuguugccguuuugcacaaacaauccugcagaacacauucggc
chr5_13795	21	chr5_13795	21	8	3	2	3	2	3	0.29	0.16	0.1	0.18	0.14	0.2	cacuccuccccugugugccagg	cacuccuccccugugugccagguccugggcuagaagcuggcacagggggguggggagcg
chr18_38845	21	chr18_38845	21	0	0	0	7	10	4	0	0	0	0.42	0.69	0.27	ugaggacaaacagaagau	cuuauaagugcucccagaacacugaggacaaacagaagau
chr3_9235	21	chr3_9235	21	0	0	5	10	2	4	0	0	0.26	0.6	0.14	0.27	uggcuaugaugguaugcugagu	uggcuaugaugguaugcugaguuuuuuuucacagcgugccauuauuaaaagg
chr7_18647	21	chr7_18647	21	2	4	9	2	0	4	0.07	0.21	0.46	0.12	0	0.27	uggugucuucauugcuggaucuu	cuuccagcaaggagucucagagucccuuuugcaggaucuggugucuucauugcuggaucuu
chr12_27313	21	chr12_27313	21	3	3	5	5	0	5	0.11	0.16	0.26	0.3	0	0.34	ucggccccugacagcucuccggg	cuucgcgggcuggucuuugucuccggaugcucggccccugacagcucuccggg
chr4_12394	21	chr4_12394	21	2	4	8	0	2	5	0.07	0.21	0.41	0	0.14	0.34	guccggugggcucucgcu	cagcgagcgccaccuuaacccccuccugcccgguccggugggcucucgcu
chr1_999	21	chr1_999	21	3	4	3	2	3	6	0.11	0.21	0.15	0.12	0.21	0.4	uagaauuugaaccaaggaccauc	cagccuugguucaaauccuacauaagaucacagagguagaauuugaaccaaggaccauc
chr9_23060	21	chr9_23060	21	5	2	1	3	2	8	0.18	0.1	0.05	0.18	0.14	0.54	ccgacacagguuggagaggcucg	ccgacacagguuggagaggcucgauuucuuagcccacuagccugugucgaga
chr9_23022	21	chr9_23022	21	3	1	1	5	1	10	0.11	0.05	0.05	0.3	0.07	0.67	uuggggcgaggggacuuggaucc	uuggggcgaggggacuuggauccgucucaacguuccauaucccugcccgcccccagcaga
chr12_27109	20	chr12_27109	20	6	4	7	2	1	0	0.22	0.21	0.36	0.12	0.07	0	ucgggguggccccgugucugc	agacacguuuggucccuccaucgagguggaugcugagcccuccucgggguggccccgugucugc
chr3_7562	20	chr3_7562	20	8	1	6	5	0	0	0.29	0.05	0.31	0.3	0	0	ugcgccgggcuguggauuccgcc	ugcgccgggcuguggauuccgccugucuaggccaggugggaucgcaccccggcggcg
chr5_13496	20	chr5_13496	20	10	1	3	1	5	0	0.37	0.05	0.15	0.06	0.34	0	cgcagggcucgggucggcugccucc	cgcagggcucgggucggcugccuccuggucucggcuucccggagcgcgggcugagcaccgaggcuccugaguccgaaacgagacucgcc
chr6_17055	20	chr6_17055	20	8	4	5	1	2	0	0.29	0.21	0.26	0.06	0.14	0	uccaggguggaaaagagcuug	uccaggguggaaaagagcuugaguuguuggucaaggccaagcucuucugcugcccagcuca
chr6_17056	20	chr6_17055	20	8	4	5	1	2	0	0.29	0.21	0.26	0.06	0.14	0	uccaggguggaaaagagcuug	uccaggguggaaaagagcuugaguuguuggucaaggccaagcucuucugcugcccagcuca
chrX_40484	20	chrX_40484	20	9	4	6	1	0	0	0.33	0.21	0.31	0.06	0	0	cgggagcggcgggggcgg	gccgccgccgagcgccggacgcgccacgccgcucugggcagcuggagagcaggcgggcgagcgggccgggagcggcgggggcgg
chr12_28042	20	chr12_28042	20	3	4	6	2	4	1	0.11	0.21	0.31	0.12	0.28	0.07	augguagcgcaucugacu	augguagcgcaucugacuccagaucagaagguugcauguucacaucgugucggcgucaugauuggucauuuucucugcaaacc
chr11_26402	20	chr11_26402	20	2	4	2	0	10	2	0.07	0.21	0.1	0	0.69	0.13	ucauguccugcucguccugaag	ucauguccugcucguccugaagggcccagaggagagcaaggauucaugggaaaca
chr7_20625	20	chr7_20625	20	4	0	2	7	4	3	0.15	0	0.1	0.42	0.28	0.2	ugcuguaauuuacucucaccagu	ugcuguaauuuacucucaccagucagaguggugauuucuuacugucauugcuggugagaguagauuacaguagu
chr12_28959	20	chr12_28959	20	1	1	0	12	2	4	0.04	0.05	0	0.72	0.14	0.27	guagaugaugugagaaggcugacu	guagaugaugugagaaggcugacuuucaguuucacguaaaugucucug
chr7_20379	20	chr7_20379	20	0	2	2	5	7	4	0	0.1	0.1	0.3	0.48	0.27	aggacuggggagcuugcaaggg	aggacuggggagcuugcaagggccugcacucagagcccgcagccuccgcagaccacgcc
chr1_1986	20	chr1_1986	20	3	0	6	0	5	6	0.11	0	0.31	0	0.34	0.4	uugugugaugacuucugaua	uugugugaugacuucugauaggaaauuccgaaugaaucguuuucaccaga
chrY_41030	20	chrX_40419	20	1	6	3	2	2	6	0.04	0.31	0.15	0.12	0.14	0.4	cccaaaggcguggcucucagc	cccaaaggcguggcucucagcuacaccuuuguuugggugcuggcggccacugccuuuggggg
chrX_40419	20	chrX_40419	20	1	6	3	2	2	6	0.04	0.31	0.15	0.12	0.14	0.4	cccaaaggcguggcucucagc	cccaaaggcguggcucucagcuacaccuuuguuugggugcuggcggccacugccuuuggggg
chr4_12226	20	chr4_12226	20	4	4	0	5	0	7	0.15	0.21	0	0.3	0	0.47	uccuccucgucggccucuucagc	ggaagauggcggccggcggcggcggaggcagcaguaaggccuccuccucgucggccucuucagc
chr1_310	19	chr1_310	19	0	6	3	4	6	0	0	0.31	0.15	0.24	0.41	0	aggcccuuacauagucagacucu	aggcccuuacauagucagacucuugugugacauagcagugagucugacuauguaggggccuaac
chr5_12645	19	chr5_12645	19	5	3	9	0	2	0	0.18	0.16	0.46	0	0.14	0	cgugcccgccgggguccucugcc	cggaggcucucgguggccagggcccugcgcugcgccgugcccgccgggguccucugcc
chr8_22644	19	chr8_22644	19	3	4	7	2	3	0	0.11	0.21	0.36	0.12	0.21	0	cauggaggucucugucugg	uuccaaggaccucaaucccuguauuaaaucucauguuaaaaagaccugcagucauggaggucucugucugg
chrAEMK02000452.1_41493	19	chrAEMK02000452.1_41493	19	3	10	3	2	1	0	0.11	0.52	0.15	0.12	0.07	0	aacauagaggaaauuccacgu	guggauauuccuucuauguuuauguuauuugugguuaaacauagaggaaauuccacgu
chr1_358	19	chr1_358	19	3	0	8	7	0	1	0.11	0	0.41	0.42	0	0.07	uucuucugugugggucug	uucuucugugugggucuguguuuugagucuucucuuauuauaaagacaccaguuagacuggau
chr15_35531	19	chr15_35531	19	2	6	3	3	2	3	0.07	0.31	0.15	0.18	0.14	0.2	cucacggcucuguuuccugcagc	ggugggauggggagcaggagggcggccgcacacgugucccucacggcucuguuuccugcagc
chr4_11602	19	chr4_11602	19	4	3	5	3	1	3	0.15	0.16	0.26	0.18	0.07	0.2	uuguucuccggucaaagauuga	aaucuaaugacgggaguguuauguacuuuauggaaggcauuguucuccggucaaagauuga
chr8_22245	19	chr8_22245	19	7	6	2	1	0	3	0.26	0.31	0.1	0.06	0	0.2	aacuggauguaagauagaaucau	aacuggauguaagauagaaucaugcuguauucuuuugugaugcuucuuucauucagcaug
chr14_32641	19	chr14_32641	19	2	3	3	5	1	5	0.07	0.16	0.15	0.3	0.07	0.34	guacgugaugaggucugaug	uuccaugguggggugaggggccaccuugguugccggacuugccugugggccaguacgugaugaggucugaug
chr1_1672	19	chr1_1672	19	4	1	0	9	0	5	0.15	0.05	0	0.54	0	0.34	cuccucggacccuccuucgug	cuccucggacccuccuucgugcuuccaggcacuccuugcugaggccgggggagc
chr2_5848	19	chr2_5848	19	0	2	8	1	3	5	0	0.1	0.41	0.06	0.21	0.34	agugaccuggagcugaguggg	agugaccuggagcugagugggggguugcgucauucucuccccacggcccgugucaccug
chr6_17852	19	chr6_17852	19	0	0	2	4	7	6	0	0	0.1	0.24	0.48	0.4	uugcuucggagagacucugg	ggaucuccgugccugcugcgcccgcgcgauugcuucggagagacucugg
chr5_13932	19	chr5_13932	19	1	5	0	2	2	9	0.04	0.26	0	0.12	0.14	0.61	cggggguggcggcggggg	ccugacccccccucccugggagcgggcggggguggcggcggggg
chrAEMK02000682.1_41815	19	chr5_13932	19	1	5	0	2	2	9	0.04	0.26	0	0.12	0.14	0.61	cggggguggcggcggggg	ccugacccccccucccugggagcgggcggggguggcggcggggg
chr1_3685	19	chr1_3685	19	3	1	0	5	0	10	0.11	0.05	0	0.3	0	0.67	uuuuguggcugcuucuguggg	uuuuguggcugcuucuguggguguccuccucuagcgaaggggcugguuugug
chr15_36357	19	chr15_36357	19	5	1	0	2	0	11	0.18	0.05	0	0.12	0	0.74	gucauuuuugugaucugcagcu	gucauuuuugugaucugcagcuaguauucucacuccaguugcauagucacaaaagugauc
chr6_17026	18	chr13_30720	18	5	3	0	2	8	0	0.18	0.16	0	0.12	0.55	0	ugcucugcuccccuggcccagg	ugcucugcuccccuggcccaggcccaccagcacacguggugcccgccaggaccagccuguccccaag
chr13_30720	18	chr13_30720	18	5	3	0	2	8	0	0.18	0.16	0	0.12	0.55	0	ugcucugcuccccuggcccagg	ugcucugcuccccuggcccaggcccaccagcacacguggugcccgccaggaccagccuguccccaag
chr1_1261	18	chr1_1261	18	3	2	8	5	0	0	0.11	0.1	0.41	0.3	0	0	ugcucuucauaucuguuucagg	ugaaacuuucuugugaaguacuuuuaaugugcucuucauaucuguuucagg
chr6_16773	18	chr6_16773	18	4	8	4	2	0	0	0.15	0.42	0.21	0.12	0	0	acugaggcggaacagcuc	acugaggcggaacagcucauuuuauagaugucugccucuga
chr7_18412	18	chr7_18411	18	3	9	4	1	1	0	0.11	0.47	0.21	0.06	0.07	0	ucucuaguucuugcacgcucu	agugugugagggggagaggccuguuucgcucccgggucucuaguucuugcacgcucu
chr7_18411	18	chr7_18411	18	3	9	4	1	1	0	0.11	0.47	0.21	0.06	0.07	0	ucucuaguucuugcacgcucu	agugugugagggggagaggccuguuucgcucccgggucucuaguucuugcacgcucu
chr15_34933	18	chr15_34933	18	8	4	4	1	0	1	0.29	0.21	0.21	0.06	0	0.07	ccggaccgaguccccuuccccu	agggagggggcccgcgggccgaggcgaaauuauuccgaaagcccggaccgaguccccuuccccu
chr1_1903	18	chr1_1903	18	1	8	2	3	3	1	0.04	0.42	0.1	0.18	0.21	0.07	ugggguggggcucucaaccuccaga	uggagggggagccgggucccgcacagacgguuguaaccugugggguggggcucucaaccuccaga
chr3_9202	18	chr3_9202	18	2	6	2	5	2	1	0.07	0.31	0.1	0.3	0.14	0.07	ugugucugucugucuguccgccagg	aggcggguggcugcugcguccacuggacuuacaauguccugugucugucugucuguccgccagg
chr5_13747	18	chr5_13747	18	3	10	1	0	3	1	0.11	0.52	0.05	0	0.21	0.07	ucuggaggcagcggcuggcucu	ucuggaggcagcggcuggcucucugguuggcuuguuccugagaccgaagccgccuccucagagu
chr14_32370	18	chr14_32369	18	1	4	6	5	0	2	0.04	0.21	0.31	0.3	0	0.13	cgcacgggcagcagcggc	ggcgcaggcccgcugccgagugagggaaugcaaggcgggcccggcgcgcacgggcagcagcggc
chr14_32369	18	chr14_32369	18	1	4	6	5	0	2	0.04	0.21	0.31	0.3	0	0.13	cgcacgggcagcagcggc	ggcgcaggcccgcugccgagugagggaaugcaaggcgggcccggcgcgcacgggcagcagcggc
chr7_20831	18	chr7_19602	18	3	2	1	7	3	2	0.11	0.1	0.05	0.42	0.21	0.13	ugaugccuggcauuuugugugu	ugaugccuggcauuuuguguguauggagaaagaaacacacaacacacacaaaaugccaggcaucaggg
chr7_19602	18	chr7_19602	18	3	2	1	7	3	2	0.11	0.1	0.05	0.42	0.21	0.13	ugaugccuggcauuuugugugu	ugaugccuggcauuuuguguguauggagaaagaaacacacaacacacacaaaaugccaggcaucaggg
chr4_11401	18	chr4_11401	18	0	5	2	3	5	3	0	0.26	0.1	0.18	0.34	0.2	uucuucccaggcucugucuga	ugauaaagucuguuggaauggaggcggguuuuauuuuuucccuucuucccaggcucugucuga
chr5_12804	18	chr5_12804	18	4	4	3	0	4	3	0.15	0.21	0.15	0	0.28	0.2	uugaaccugauagcagcugccgcca	uugaaccugauagcagcugccgccaggugauguccacaggguggcggcgcuggucagugucaagc
chr15_36524	18	chr15_36524	18	0	7	3	3	1	4	0	0.36	0.15	0.18	0.07	0.27	ucuuggaccccuucucacagga	cuucgagaaggggcucauucagacucuggagucggccggucuuggaccccuucucacagga
chr6_17598	18	chr6_17598	18	4	2	3	1	4	4	0.15	0.1	0.15	0.06	0.28	0.27	ucggcgcgcucggcggaaacuga	aguuuccucccuggcgccggccagucugcggacggcccccgccucggcgcgcucggcggaaacuga
chr7_19005	18	chr7_19005	18	2	2	4	1	5	4	0.07	0.1	0.21	0.06	0.34	0.27	ugcccucuugucugugucccuagc	agaggggcacacacaugagcagugguuccacuuugcacugcccucuugucugugucccuagc
chr12_27506	18	chr12_27506	18	1	2	0	5	5	5	0.04	0.1	0	0.3	0.34	0.34	acgggacuuggagucaga	acgggacuuggagucagacugacuggguucaaauccuggcu
chr6_16661	18	chr6_16661	18	4	5	1	3	0	5	0.15	0.26	0.05	0.18	0	0.34	guacagugaugagaaccua	guacagugaugagaaccuaagaugggaagagccuuggagaacauaggcugaggcuagaagcuuacuuuguggacacugcugccu
chr14_33125	18	chr14_33125	18	4	0	0	2	4	8	0.15	0	0	0.12	0.28	0.54	ucugacccuggccccugacc	ucagggcaagggguagaggcugaaccucugacccuggccccugacc
chr14_34536	18	chr14_34536	18	4	3	0	1	0	10	0.15	0.16	0	0.06	0	0.67	ugguggucuuggcaugcuucugc	agcugcaggacaggccaccccacgcuguccggucugugguggucuuggcaugcuucugc
chr17_37790	17	chr17_37790	17	9	6	1	0	1	0	0.33	0.31	0.05	0	0.07	0	agugugcagggacagccucggg	agugugcagggacagccucggggugugggcgucgaccccaaggcuccaccugcgcccaag
chr1_4050	17	chr1_4050	17	1	4	6	0	6	0	0.04	0.21	0.31	0	0.41	0	cagaaggggagucggagcaga	agcucccgcucaccccugccacgucaaaggaggcagaaggggagucggagcaga
chr2_4243	17	chr2_4243	17	5	3	2	6	1	0	0.18	0.16	0.1	0.36	0.07	0	ugcccacacuccucucuccagu	aggagggaggccaggugggggcugggcacccgaugaccccugcccacacuccucucuccagu
chr2_5215	17	chr2_5215	17	3	2	9	3	0	0	0.11	0.1	0.46	0.18	0	0	cucagccuccuccaucucugga	gggagguggggcgggggcggaggagaggcuggcagucuacuugcucucucagccuccuccaucucugga
chr7_21046	17	chr2_6306	17	7	1	4	0	5	0	0.26	0.05	0.21	0	0.34	0	agagggaagagggaaggaggga	agagggaagagggaaggagggauaacguaggaaagagaucucccuccuccuuccacccuagucu
chr5_12700	17	chr5_12700	17	5	5	4	2	1	0	0.18	0.26	0.21	0.12	0.07	0	ccacaaugaugacagucugaug	ccacaaugaugacagucugauggugacaguaaugguaauuaauggucaugaccaugaugguggugauggugguggugau
chr6_15553	17	chr6_15553	17	4	1	9	0	3	0	0.15	0.05	0.46	0	0.21	0	ccgccccccggccccgcgg	gcgggggggggcggcgggccgccccccggccccgcgg
chr7_18368	17	chr7_18368	17	0	11	5	0	1	0	0	0.57	0.26	0	0.07	0	ccgcggggccgcagcgccc	ccgcggggccgcagcgcccccagaccgccggggagcgugggcacgaggcggcg
chr8_22006	17	chr8_22006	17	3	13	1	0	0	0	0.11	0.68	0.05	0	0	0	auggaggccaugggguugg	cccuccaggcucuacuggaaacaagauacuagcuuggaccagaauggaggccaugggguugg
chr10_25801	17	chr10_25801	17	3	8	0	1	4	1	0.11	0.42	0	0.06	0.28	0.07	ucugagugaugaccccugaca	ucugagugaugaccccugacaugugguucagugaaggggcugcagcguuaacagaggacaucucaagagg
chrAEMK02000152.1_42272	17	chr6_17579	17	4	4	8	0	0	1	0.15	0.21	0.41	0	0	0.07	caggaggcugaggcugga	caggaggcugaggcuggagagccggcuucccuccagcccagggccuccucgc
chr6_17579	17	chr6_17579	17	4	4	8	0	0	1	0.15	0.21	0.41	0	0	0.07	caggaggcugaggcugga	caggaggcugaggcuggagagccggcuucccuccagcccagggccuccucgc
chr11_26436	17	chr11_26436	17	2	8	2	1	2	2	0.07	0.42	0.1	0.06	0.14	0.13	cuguguggacggucuggcc	cuguguggacggucuggccucggucuccguuccggggcuuaaaauagucaaggucacagcc
chr6_15155	17	chr6_15155	17	1	1	0	9	4	2	0.04	0.05	0	0.54	0.28	0.13	uguguccuccugcucccuagg	ccaggggauggcuuggggaacaaagauggcuaaggguggccucuguguccuccugcucccuagg
chr9_23659	17	chr9_23659	17	1	7	7	0	0	2	0.04	0.36	0.36	0	0	0.13	gugggcugggagggaggcc	gcuccgcuccccggcgcgcccgggugggcugggagggaggcc
chr13_30871	17	chr13_30871	17	8	5	1	0	0	3	0.29	0.26	0.05	0	0	0.2	acgcggcgagccgaaugcugg	acgcggcgagccgaaugcugggaaggcguggacgccagccuccggcccgccccgucc
chr17_37854	17	chr17_37854	17	7	3	3	1	0	3	0.26	0.16	0.15	0.06	0	0.2	ucugccuggacauguguucguac	ucugccuggacauguguucguacuccugggggagugcguaugggugucugggccugug
chr6_16524	17	chr6_16524	17	1	0	1	4	8	3	0.04	0	0.05	0.24	0.55	0.2	uggcggggguggcggcggg	gguggucaugacaguuauggcggaggugguggcggggguggcggcggg
chr2_5686	17	chr2_5686	17	3	1	1	3	4	5	0.11	0.05	0.05	0.18	0.28	0.34	ugaccugggacucggacagcug	ugaccugggacucggacagcugcuugcacucauucagcugcucgauccacugguccag
chr2_5862	17	chr2_5861	17	4	4	0	4	0	5	0.15	0.21	0	0.24	0	0.34	ccugacccuguccccucugugucc	ccugacccuguccccucuguguccugagcagcuggccuuggacauugauagggauguggaggac
chr2_5861	17	chr2_5861	17	4	4	0	4	0	5	0.15	0.21	0	0.24	0	0.34	ccugacccuguccccucugugucc	ccugacccuguccccucuguguccugagcagcuggccuuggacauugauagggauguggaggac
chr6_15004	17	chr6_15004	17	2	0	0	3	7	5	0.07	0	0	0.18	0.48	0.34	cagcggaugaucuuugaa	cagcggaugaucuuugaaguaaguccuggggguugagggaccagugguuauggcagggacaggcagga
chr3_9390	17	chr3_9390	17	0	2	3	1	3	8	0	0.1	0.15	0.06	0.21	0.54	gcuggacuuggagucaga	uauucccaaaucacaaugguaauaacugcuggacuuggagucaga
chr5_14214	17	chr5_14214	17	1	0	0	3	0	13	0.04	0	0	0.18	0	0.88	gauuuuucggacacccaga	uugguggaaaaaucacuuauucugauuuuucggacacccaga
chr18_39105	16	chr18_39105	16	3	2	4	3	4	0	0.11	0.1	0.21	0.18	0.28	0	ccgcugucggcuugcagagacc	ucgcugcaucccgacagccugggagaagccaggcuggccccgcugucggcuugcagagacc
chr18_39106	16	chr18_39105	16	3	2	4	3	4	0	0.11	0.1	0.21	0.18	0.28	0	ccgcugucggcuugcagagacc	ucgcugcaucccgacagccugggagaagccaggcuggccccgcugucggcuugcagagacc
chr3_8038	16	chr3_8038	16	3	5	6	1	1	0	0.11	0.26	0.31	0.06	0.07	0	uuccguccccugagcaucccgag	uuccguccccugagcaucccgagcagaaguuuuuaucagggugcuuuggaggaagugguc
chr3_9032	16	chr3_9032	16	4	4	1	7	0	0	0.15	0.21	0.05	0.42	0	0	uugggccugggucucuccuagg	uggguggggcuuggguccccagcucugacuugggccugggucucuccuagg
chr4_10961	16	chr4_10961	16	1	7	8	0	0	0	0.04	0.36	0.41	0	0	0	uccgcucuguggccacagg	cgugggcucgucggacagcaagcagaccuucagccccgugcucaagcucaaugccgugcucauccgcucuguggccacagg
chr6_15395	16	chr6_15395	16	6	5	0	5	0	0	0.22	0.26	0	0.3	0	0	ucccccugucugugucccccaga	uggggggcauagccggggaggggcgaugggggcgaggcuguggccccugugaccuagcuccuccccucccccugucugugucccccaga
chr9_22741	16	chr9_22741	16	0	3	2	11	0	0	0	0.16	0.1	0.66	0	0	ucucccacccuugcugccugcag	gauggcagcgcagggucugggacuggcugguugaccccucucccacccuugcugccugcag
chr12_28126	16	chr12_28126	16	5	3	2	2	3	1	0.18	0.16	0.1	0.12	0.21	0.07	cagggcuuggggagcagagaga	ccuuugcuucccgguuccugcauuaccgucuggaaaggcagggcuuggggagcagagaga
chr15_36493	16	chr15_36493	16	6	3	6	0	0	1	0.22	0.16	0.31	0	0	0.07	cugggugauggaagcugaga	cugggugauggaagcugagauugggguaugcuauugucauccaggu
chr15_36494	16	chr15_36493	16	6	3	6	0	0	1	0.22	0.16	0.31	0	0	0.07	cugggugauggaagcugaga	cugggugauggaagcugagauugggguaugcuauugucauccaggu
chr2_6290	16	chr2_6290	16	4	3	2	3	3	1	0.15	0.16	0.1	0.18	0.21	0.07	cugggguguggugguggugg	gccccauccauacuuguaccugugaagcggucaggcugggagaggaugcagcugggguguggugguggugg
chr9_24256	16	chr2_6290	16	4	3	2	3	3	1	0.15	0.16	0.1	0.18	0.21	0.07	cugggguguggugguggu	gccccauccauacuuguaccugugaagcggucaggcugggagaggaugcagcugggguguggugguggugg
chr9_24040	16	chr9_24040	16	1	1	4	4	5	1	0.04	0.05	0.21	0.24	0.34	0.07	ugguguagugguaucaugcaagauu	uaguguauaauauauauacaccaggaggcaacagcacugcugguguagugguaucaugcaagauu
chr9_24579	16	chr9_24579	16	1	5	2	7	0	1	0.04	0.26	0.1	0.42	0	0.07	ugagggcaggugcugagcu	ugagggcaggugcugagcuuauuugccgcucuugccaagg
chr9_24580	16	chr9_24579	16	1	5	2	7	0	1	0.04	0.26	0.1	0.42	0	0.07	ugagggcaggugcugagcu	ugagggcaggugcugagcuuauuugccgcucuugccaagg
chr12_28930	16	chr12_28930	16	0	3	1	5	5	2	0	0.16	0.05	0.3	0.34	0.13	ccccggccuguccccugaccaca	uuaggcaggggaugggauugcuggccaguugcacuuugccccggccuguccccugaccaca
chr1_337	16	chr1_337	16	1	5	8	0	0	2	0.04	0.26	0.41	0	0	0.13	ugcuagauggcuggagcugagu	ucagggcuccgccaggcuuggugccaagacuauuuaggugcuagauggcuggagcugagu
chr1_370	16	chr1_370	16	7	4	3	0	0	2	0.26	0.21	0.15	0	0	0.13	gggcuuagauguagauucucu	gggcuuagauguagauucucuggucauugaguacauccaggugaaaaaagcccca
chr2_4384	16	chr2_4383	16	7	0	1	2	4	2	0.26	0	0.05	0.12	0.28	0.13	gggcaagccugcggaggugu	aggccuuccugagcaugcgcaguuuccuccagcccugggcaagccugcggaggugugg
chr5_13039	16	chr5_13039	16	3	6	0	3	2	2	0.11	0.31	0	0.18	0.14	0.13	accugcucuccacucugccccagu	uggggagugugggcagacuucaggaagccuucuuaaggccugcacgggggcuucgagggguccugaccugcucuccacucugccccagu
chr1_4035	16	chr1_4035	16	2	1	3	4	3	3	0.07	0.05	0.15	0.24	0.21	0.2	cacggcccuacuucuguccccagc	cacggcccuacuucuguccccagcggugaaggaggccgccguucagaggaagcacaaccuguacc
chr2_6510	16	chr2_6510	16	5	2	1	1	4	3	0.18	0.1	0.05	0.06	0.28	0.2	ugggcuccgcuucacuccaga	agggguggggaccaaggcccaaggcuacaagagcaaucuuugacuccugggcuccgcuucacuccaga
chr10_25651	16	chr10_25651	16	1	1	4	3	3	4	0.04	0.05	0.21	0.18	0.21	0.27	cugucucucuguguccucu	cugucucucuguguccucuuccuuuagggacaccagucagau
chr2_6660	16	chr2_6660	16	3	1	2	0	3	7	0.11	0.05	0.1	0	0.21	0.47	ucgggugagcaggugggcggacgg	ucgggugagcaggugggcggacggaaggugacaacccauccgccccugcucugcaccccagc
chr9_22665	16	chr9_22665	16	2	4	1	0	0	9	0.07	0.21	0.05	0	0	0.61	cuggccaggggccuccggagc	ucugagggacccuggucccggacgccccagcaccuggccaggggccuccggagc
chr2_6291	16	chr2_6291	16	3	3	0	0	0	10	0.11	0.16	0	0	0	0.67	ugcggucugggcugugucagcc	ugcggucugggcugugucagccaaccuggcugggcagccucaggcugcacc
chr11_26448	15	chr11_25895	15	0	1	0	9	5	0	0	0.05	0	0.54	0.34	0	cggagggcggggccuggcgggu	cgccgggcccgccuuccacgccggccagugagggcgcggagggcggggccuggcgggu
chr11_25895	15	chr11_25895	15	0	1	0	9	5	0	0	0.05	0	0.54	0.34	0	cggagggcggggccuggcgggu	cgccgggcccgccuuccacgccggccagugagggcgcggagggcggggccuggcgggu
chr13_31350	15	chr13_31349	15	0	1	5	5	4	0	0	0.05	0.26	0.3	0.28	0	ucuguacugagacucauucggu	ucuguacugagacucauucgguaaauauuugagcuccuguugcuaagcaugagccaaaugcuaggaauagaguggugaaaaagacu
chr13_31349	15	chr13_31349	15	0	1	5	5	4	0	0	0.05	0.26	0.3	0.28	0	ucuguacugagacucauucggu	ucuguacugagacucauucgguaaauauuugagcuccuguugcuaagcaugagccaaaugcuaggaauagaguggugaaaaagacu
chr13_31746	15	chr13_31745	15	4	1	8	1	1	0	0.15	0.05	0.41	0.06	0.07	0	agcuguccggcagguucugagg	agcuguccggcagguucugaggagaccauggaggugcggccgccggcuccacggagcuugcucugcagggcg
chr13_31745	15	chr13_31745	15	4	1	8	1	1	0	0.15	0.05	0.41	0.06	0.07	0	agcuguccggcagguucugagg	agcuguccggcagguucugaggagaccauggaggugcggccgccggcuccacggagcuugcucugcagggcg
chr14_34576	15	chr14_34576	15	2	5	7	1	0	0	0.07	0.26	0.36	0.06	0	0	agagguguaggcaugggaaacc	uuccuaugcauauacuucuuugagggucuggccugaagagguguaggcaugggaaacc
chr1_1033	15	chr1_1033	15	7	6	1	1	0	0	0.26	0.31	0.05	0.06	0	0	ccgaguugugagaggaacacuu	aucguuccucucacggcugagcuagaauugugccuuuuauaagccgaguugugagaggaacacuu
chr2_4383	15	chr2_4383	15	3	0	3	4	5	0	0.11	0	0.15	0.24	0.34	0	aggccuuccugagcaugcgc	aggccuuccugagcaugcgcaguuuccuccagcccugggcaagccugcggaggugugg
chr3_8323	15	chr3_8323	15	6	5	1	0	3	0	0.22	0.26	0.05	0	0.21	0	ucuccgccaccuccaccucagc	ggaggcggcgguggcggcagcgguugucccugccucuccgccaccuccaccucagc
chr3_8324	15	chr3_8323	15	6	5	1	0	3	0	0.22	0.26	0.05	0	0.21	0	ucuccgccaccuccaccucagc	ggaggcggcgguggcggcagcgguugucccugccucuccgccaccuccaccucagc
chr4_12484	15	chr4_12484	15	0	0	15	0	0	0	0	0	0.77	0	0	0	uucccuucagauuacuuugucuuu	aagcaaaguaaucugaagggaaacucagacuaaggaaaaguuucccuucagauuacuuugucuuu
chr6_17200	15	chr6_17199	15	2	7	6	0	0	0	0.07	0.36	0.31	0	0	0	gacacacacagcgcuccuggcc	gacacacacagcgcuccuggccauggcgcagcgcuuccggcagaaccgcagugaacucaugaccaccuggaccugugggucua
chr6_17199	15	chr6_17199	15	2	7	6	0	0	0	0.07	0.36	0.31	0	0	0	gacacacacagcgcuccuggcc	gacacacacagcgcuccuggccauggcgcagcgcuuccggcagaaccgcagugaacucaugaccaccuggaccugugggucua
chr7_20413	15	chr7_20413	15	2	3	3	4	3	0	0.07	0.16	0.15	0.24	0.21	0	ugcauaugauggaguuccugaag	ugcauaugauggaguuccugaagcucucggggagcaagugcguuuucuuccuuagccuucagagaagggcuucagaagugcaug
chr8_22390	15	chr8_22390	15	0	3	4	0	7	1	0	0.16	0.21	0	0.48	0.07	uacuuuuucacuagaucucucc	agagaucuagugaaaaaguacaaacagaagagggauuaccugcacuuuuuuuuguacuuuuucacuagaucucucc
chr11_25973	15	chr11_25973	15	0	4	7	1	1	2	0	0.21	0.36	0.06	0.07	0.13	uacguggcgcucuguccucugg	ugggggcggaaagcuguguggguagguggccagaugacccaggucccguacguggcgcucuguccucugg
chr12_27612	15	chr12_27612	15	0	0	0	13	0	2	0	0	0	0.78	0	0.13	cugcacugucucugaggu	cugcacugucucugaggucugcugguauagucaugaugaccagaagaaagggaggggagga
chr6_14730	15	chr6_14730	15	8	0	0	4	1	2	0.29	0	0	0.24	0.07	0.13	cauggugauguaugucugacu	cauggugauguaugucugacuggugcgucagaaacacggcugauugug
chr6_15400	15	chr6_15400	15	4	5	2	1	1	2	0.15	0.26	0.1	0.06	0.07	0.13	uuccacugucucugcugcucagg	uuccacugucucugcugcucagggugagcuugcauuaugggauc
chr6_16952	15	chr6_16952	15	1	6	5	1	0	2	0.04	0.31	0.26	0.06	0	0.13	ucccuggguguaggcagagcc	cccugccacgcccagaacaaggggucugacacacuggaacucccuggguguaggcagagcc
chr9_22934	15	chr9_22934	15	4	7	0	0	2	2	0.15	0.36	0	0	0.14	0.13	uccgggcugucgcgccaccgcg	uccgggcugucgcgccaccgcgaugggcaaaacugccgauucccggggccucggaguccggccc
chr15_34787	15	chr15_34787	15	2	0	0	3	7	3	0.07	0	0	0.18	0.48	0.2	uuggcugauguauccuucugauc	uuuuugaagacuacaagccauuuuacuuuguagaaaugucuuaauuugugccuuggcugauguauccuucugauc
chr1_2788	15	chr1_2788	15	5	0	2	1	4	3	0.18	0	0.1	0.06	0.28	0.2	ugugcuggaggccucugg	accccaccccagccaaaacagguggaucugauacuccacccugugcuggaggccucugg
chr3_8297	15	chr3_8297	15	4	5	1	1	1	3	0.15	0.26	0.05	0.06	0.07	0.2	ccugugcuuccucaccugcaga	ugccgguguggggggcacggccagauccaagacaaacgugccugugcuuccucaccugcaga
chr11_25911	15	chr11_25911	15	0	2	1	0	8	4	0	0.1	0.05	0	0.55	0.27	cugcuggugacucugcucuggc	aggggcugaggcuccagcagcggcagccacgucccagcgucccugcuggugacucugcucuggc
chr5_13974	15	chr5_13974	15	2	1	3	1	3	5	0.07	0.05	0.15	0.06	0.21	0.34	cuaacccuggccucccuccugcag	uucgggagggagcggggacuugggacagacagcaccugugcuaacccuggccucccuccugcag
chr6_14760	15	chr6_14760	15	2	0	0	2	6	5	0.07	0	0	0.12	0.41	0.34	ugugacuggcuucccccg	ugugacuggcuucccccggacggcgucuccccagcccagagguucuccuggguuccagucccgg
chr13_30069	15	chr13_30069	15	0	1	0	1	4	9	0	0.05	0	0.06	0.28	0.61	accugaugaugugagaucugagc	uuaggaauucuuuuccaucuagacauggggcuaauggugagucucaggaaaccugaugaugugagaucugagc
chr13_30729	14	chr13_30729	14	7	7	0	0	0	0	0.26	0.36	0	0	0	0	aauaacguggagcaagug	cuucucccuuucguuuuucagaaaaauaacguggagcaagug
chr14_33850	14	chr14_33849	14	3	7	2	2	0	0	0.11	0.36	0.1	0.12	0	0	ucauggcccugcucugcugcaga	ucauggcccugcucugcugcagaugccaacccuuuccugcagucagugcacagaugcaugacc
chr14_33849	14	chr14_33849	14	3	7	2	2	0	0	0.11	0.36	0.1	0.12	0	0	ucauggcccugcucugcugcaga	ucauggcccugcucugcugcagaugccaacccuuuccugcagucagugcacagaugcaugacc
chr14_34054	14	chr14_34054	14	2	5	0	1	6	0	0.07	0.26	0	0.06	0.41	0	ugcgaacugggaccuacaucaga	auugauaggccccaguuccuggcgcuugguccgggagcugcgaacugggaccuacaucaga
chr14_34573	14	chr14_34573	14	10	1	3	0	0	0	0.37	0.05	0.15	0	0	0	ccucggggccacgcgcgcg	ccucggggccacgcgcgcgaauuaaauggggaacaaacgaggagcggcguccccgugucc
chr1_3067	14	chr1_3067	14	1	0	1	7	5	0	0.04	0	0.05	0.42	0.34	0	gcauaugaugauauugacgcugacu	gcauaugaugauauugacgcugacuuuuauccucauggugugaaaguuaugcuuacugucagaucauaaaaaagau
chr3_7987	14	chr3_7987	14	8	4	2	0	0	0	0.29	0.21	0.1	0	0	0	ucuguggaggcgacucug	ggcuuccaaagaaacaagcucccgucucugggcacggucccagauacagagcuggacucuguggaggcgacucug
chr4_12341	14	chr4_12341	14	3	8	3	0	0	0	0.11	0.42	0.15	0	0	0	uagggauuccacguugucacugc	uagggauuccacguugucacugcuguguuugguuugcugcugugacacggguucaauccccagc
chr7_18661	14	chr7_18661	14	3	0	2	1	8	0	0.11	0	0.1	0.06	0.55	0	ccggcuaccucucuuccccagg	uggggaagggagaaugggcuggguuuuggaccccagccggcuaccucucuuccccagg
chr7_19767	14	chr7_19767	14	4	4	6	0	0	0	0.15	0.21	0.31	0	0	0	cccgccuccggcuguggagc	ucgucaucagcccggcuccggauucgaaaggggcguggagcccgccuccggcuguggagc
chr7_20631	14	chr7_20631	14	7	0	3	2	2	0	0.26	0	0.15	0.12	0.14	0	aaagaucauagagguaaaguug	aaagaucauagagguaaaguugucaucagaguuagcacuuuaccucuauggucuuucu
chrX_41013	14	chrX_41013	14	1	3	8	0	2	0	0.04	0.16	0.41	0	0.14	0	ucgggccgggaagggcggg	ucgggccgggaagggcgggcggaaggcggauucugcucccggccgggcuccguguucgcccgcucgggcggccgggcc
chrX_41014	14	chrX_41013	14	1	3	8	0	2	0	0.04	0.16	0.41	0	0.14	0	ucgggccgggaagggcggg	ucgggccgggaagggcgggcggaaggcggauucugcucccggccgggcuccguguucgcccgcucgggcggccgggcc
chr3_7889	14	chr3_7889	14	9	1	1	1	1	1	0.33	0.05	0.05	0.06	0.07	0.07	ugcuuccuucugaacauuuu	aauguucagaaggaagcagcuuggucaaaccugcuuccuucugaacauuuu
chr4_10239	14	chr4_10239	14	2	1	7	0	3	1	0.07	0.05	0.36	0	0.21	0.07	acaugugaugagagcucaccugauu	gaggggacucucacuguugcggguccggugggacaugugaugagagcucaccugauu
chr6_14801	14	chr6_14801	14	1	1	5	4	2	1	0.04	0.05	0.26	0.24	0.14	0.07	cagccgucugucuuuccuccagg	ugggggcgggagcgggcggggcugggccugggcaggaccucagccgucugucuuuccuccagg
chr6_16025	14	chr6_16025	14	3	4	3	2	1	1	0.11	0.21	0.15	0.12	0.07	0.07	acgcggagcucuggccucugga	ugaggugacugcuccgcauccgcagacccaggacgcggagcucuggccucugga
chr10_24822	14	chr10_24822	14	7	1	2	2	0	2	0.26	0.05	0.1	0.12	0	0.13	uauuggccuacagaaaugacaga	uauuggccuacagaaaugacagacagauuuagccacauugucugucaauucauaggucauuuuc
chr12_28180	14	chr12_28180	14	4	2	3	0	2	3	0.15	0.1	0.15	0	0.14	0.2	uggcucagcucagcaggag	ucugcaaguaccuuuggaggcgggaguguuucccgcccauggcucagcucagcaggag
chr13_31907	14	chr13_31907	14	2	1	6	0	2	3	0.07	0.05	0.31	0	0.14	0.2	auucuguuagaaaaaugcaaga	auucuguuagaaaaaugcaagaaugcuauaaaaucuuguguuuuucuaacgggaauac
chr7_19722	14	chr7_19722	14	2	1	4	4	0	3	0.07	0.05	0.21	0.24	0	0.2	uacuguggcaugaguucgaucc	uacuguggcaugaguucgaucccugaccagggaaauucugcaugccaggggugu
chr12_27759	14	chr12_27759	14	3	3	0	0	3	5	0.11	0.16	0	0	0.21	0.34	uggggugguuggaauuuu	auuuccccccauccuuucacuuuggggugguuggaauuuu
chr2_6633	14	chr2_6633	14	1	1	1	1	5	5	0.04	0.05	0.05	0.06	0.34	0.34	auucgggugcagggacugagagc	auucgggugcagggacugagagcugggaccguagccucaggacccccaccugccaca
chr3_8763	14	chr3_8763	14	1	2	0	2	2	7	0.04	0.1	0	0.12	0.14	0.47	cugggaucaucccucuggcag	agggcagggggaugauccuggucucaguagccugggaucaucccucuggcag
chr12_28454	13	chr12_28454	13	2	5	0	0	6	0	0.07	0.26	0	0	0.41	0	caccggcuguccucccuucagg	agaagagggggcggcggggaggaaggggugcacagggacuccuuccagaccccuucaccggcuguccucccuucagg
chr13_30054	13	chr13_30053	13	1	3	2	0	7	0	0.04	0.16	0.1	0	0.48	0	aauccuuccuguccugagccagg	aauggcccugguguggaauuggagcccuaagugaccaggaauccuuccuguccugagccagg
chr13_30053	13	chr13_30053	13	1	3	2	0	7	0	0.04	0.16	0.1	0	0.48	0	aauccuuccuguccugagccagg	aauggcccugguguggaauuggagcccuaagugaccaggaauccuuccuguccugagccagg
chr15_35541	13	chr15_35541	13	0	4	9	0	0	0	0	0.21	0.46	0	0	0	gugugugguuggaaaacuu	gugugugguuggaaaacuuuuuuuuuucugaauaaaaaagauucuacugggauucccacuguggcgcaa
chr18_38828	13	chr18_38828	13	1	5	5	2	0	0	0.04	0.26	0.26	0.12	0	0	aggcuuucugggaaugag	aggcuuucugggaaugagagcugauuuccugucuuu
chr18_39044	13	chr18_39044	13	2	5	4	1	1	0	0.07	0.26	0.21	0.06	0.07	0	ccggggucgguucuugcagauc	ccggggucgguucuugcagaucugcuuguuacugagagccccccgcagagcugcaaaucguccccgcug
chr18_39332	13	chr18_39332	13	4	3	5	0	1	0	0.15	0.16	0.26	0	0.07	0	cugacccugcuccccuuguccagg	ggggcaggguggagggaggcgggacagggugccaggaggcucugcugacccugcuccccuuguccagg
chr1_3115	13	chr1_3115	13	4	4	2	1	2	0	0.15	0.21	0.1	0.06	0.14	0	ccuccuugccgggcaaaccucgcu	ccuccuugccgggcaaaccucgcucuggagaagaaagggagaagcgaggcgagcccugcgaggcgcg
chr2_7356	13	chr2_7355	13	5	4	0	0	4	0	0.18	0.21	0	0	0.28	0	aagcagagugacguggcuggaag	aagcagagugacguggcuggaaguguggguucugcugucgcacccucuccauccagaucgugucuucacccuccugag
chr2_7355	13	chr2_7355	13	5	4	0	0	4	0	0.18	0.21	0	0	0.28	0	aagcagagugacguggcuggaag	aagcagagugacguggcuggaaguguggguucugcugucgcacccucuccauccagaucgugucuucacccuccugag
chr3_7574	13	chr3_7574	13	6	1	3	2	1	0	0.22	0.05	0.15	0.12	0.07	0	aggaggcccgcggggcccuggcugu	aggaggcccgcggggcccuggcuguggcugggaaagagccgguucccgagggcccgugu
chr3_9626	13	chr3_9626	13	3	6	0	4	0	0	0.11	0.31	0	0.24	0	0	cagaccagcaggauguggacu	uccacagccugcagggucagagcugaugguguagaaaggacucagaccagcaggauguggacu
chr3_9630	13	chr3_9630	13	4	0	4	5	0	0	0.15	0	0.21	0.3	0	0	uuauuucuuggccugugugu	acauggguguuuagagguuguuucuggaauucugucaauagcuuauuucuuggccugugugu
chr5_12631	13	chr5_12631	13	3	6	0	2	2	0	0.11	0.31	0	0.12	0.14	0	uucuaccucugcuccuggcccagg	ugucggguaggagguggggagaaaccagugacucauugcuucuaccucugcuccuggcccagg
chr5_12632	13	chr5_12631	13	3	6	0	2	2	0	0.11	0.31	0	0.12	0.14	0	uucuaccucugcuccuggcccagg	ugucggguaggagguggggagaaaccagugacucauugcuucuaccucugcuccuggcccagg
chr5_12654	13	chr5_12654	13	6	1	2	2	2	0	0.22	0.05	0.1	0.12	0.14	0	agggacuuuugggggcag	agggacuuuugggggcagccugccuccucucuga
chr6_18237	13	chr6_18237	13	0	6	7	0	0	0	0	0.31	0.36	0	0	0	uggggaggacugggaccc	uggggaggacugggacccagaaguggggaagaauucaggguaucuuccacagaucuggcuuuggucaacccuagg
chr13_30763	13	chr13_30763	13	0	5	4	3	0	1	0	0.26	0.21	0.18	0	0.07	acugcuacuuccauaggacugaga	acugcuacuuccauaggacugagaacuacuaaaagggauuuuuuaaaggguucucaguccuaggaaguagcgaucg
chr15_35473	13	chr15_35473	13	2	5	1	3	1	1	0.07	0.26	0.05	0.18	0.07	0.07	cgccuguuccucuucccgcaga	cgcugggaugagggacgaagguccgauugcacauggcgccuguuccucuucccgcaga
chr1_3577	13	chr1_3577	13	0	0	0	4	8	1	0	0	0	0.24	0.55	0.07	uugggugcugaugaaaaa	uugggugcugaugaaaaauccuguguguucucucucaaggcaugcagggcaccuuucuugccuccagga
chr4_11914	13	chr4_11913	13	3	1	3	4	1	1	0.11	0.05	0.15	0.24	0.07	0.07	caggaccaggugagcgccagc	caggaccaggugagcgccagccgagcaucagggccggcgcuuggcgaagcugacuccuuguuccugaggg
chr4_11913	13	chr4_11913	13	3	1	3	4	1	1	0.11	0.05	0.15	0.24	0.07	0.07	caggaccaggugagcgccagc	caggaccaggugagcgccagccgagcaucagggccggcgcuuggcgaagcugacuccuuguuccugaggg
chr6_15943	13	chr6_15943	13	1	4	2	5	0	1	0.04	0.21	0.1	0.3	0	0.07	uucccuuccccucuguccgcuuccg	gaguaaguggggagggggacgggaaggagagggacgggggcucuaggccugcgcagcccaccccuucccuuccccucuguccgcuuccg
chrAEMK02000452.1_41482	13	chrAEMK02000452.1_41481	13	1	4	3	1	3	1	0.04	0.21	0.15	0.06	0.21	0.07	augguagaccggugacgugca	gacacaccggccgcucuccaggguagcugagaggaugguagaccggugacgugca
chrAEMK02000452.1_41481	13	chrAEMK02000452.1_41481	13	1	4	3	1	3	1	0.04	0.21	0.15	0.06	0.21	0.07	augguagaccggugacgugca	gacacaccggccgcucuccaggguagcugagaggaugguagaccggugacgugca
chr12_27571	13	chr12_27571	13	5	1	5	0	0	2	0.18	0.05	0.26	0	0	0.13	cacagugauguuuucugaaa	acagaggggguuagcugggcaccgggggcacagugauguuuucugaaa
chr15_35502	13	chr15_35502	13	4	5	2	0	0	2	0.15	0.26	0.1	0	0	0.13	agggcugguccgggacgucuggucc	agggcugguccgggacgucugguccccugcaaagugaagugggagccagggcccggcagccccag
chr8_22025	13	chr8_22025	13	7	0	0	1	3	2	0.26	0	0	0.06	0.21	0.13	caaugacugugccauuucuuuu	caaugacugugccauuucuuuucucuucuccaugggucacaaugcagccgaggagccagaaacgguacaucaucccu
chr9_23337	13	chr9_23337	13	0	5	0	1	5	2	0	0.26	0	0.06	0.34	0.13	ucgauacagaggacugacugu	acagucggcccucuguaucucuggguacugcauccaucgauacagaggacugacugu
chr12_27127	13	chr12_27127	13	1	4	3	2	0	3	0.04	0.21	0.15	0.12	0	0.2	cggcuucucccucaccccucucu	ggagggggaggggaaggcagcaaagccacgcaaagcggcuucucccucaccccucucu
chr14_33377	13	chr14_33377	13	0	0	0	9	0	4	0	0	0	0.54	0	0.27	gggccuggacuggggugag	gggccuggacuggggugaggguccaagucagaauggguauccccccu
chr6_17121	13	chr6_17121	13	6	0	0	0	2	5	0.22	0	0	0	0.14	0.34	ggaggggugcgucugucugugu	ggaggggugcgucugucugugucacuuggucgcuaugacaggaccuggcucacuccucaccc
chr17_37741	13	chr17_37741	13	0	0	0	4	3	6	0	0	0	0.24	0.21	0.4	ucucgaugaugugcuuccucugauc	ucugaguuuugagcugacauggagcagugaugccuugaaaaugaugggauuuugcugucucgaugaugugcuuccucugauc
chr17_37742	13	chr17_37741	13	0	0	0	4	3	6	0	0	0	0.24	0.21	0.4	ucucgaugaugugcuuccucugauc	ucugaguuuugagcugacauggagcagugaugccuugaaaaugaugggauuuugcugucucgaugaugugcuuccucugauc
chr3_10214	13	chr3_10213	13	0	1	2	4	0	6	0	0.05	0.1	0.24	0	0.4	ucaaagggcguguggcgggcgu	ucaaagggcguguggcgggcguugccaggcuuucugaauugguguggggauccgggaauucagcuccuuccgcag
chr3_10213	13	chr3_10213	13	0	1	2	4	0	6	0	0.05	0.1	0.24	0	0.4	ucaaagggcguguggcgggcgu	ucaaagggcguguggcgggcguugccaggcuuucugaauugguguggggauccgggaauucagcuccuuccgcag
chr7_18663	13	chr7_18663	13	4	2	0	0	0	7	0.15	0.1	0	0	0	0.47	uucagcgguucuguucccccagg	uaggggaugagagcuugaugacgauaaucuggaaaagcaaaagccacguucagcgguucuguucccccagg
chr15_34859	12	chr15_34859	12	4	8	0	0	0	0	0.15	0.42	0	0	0	0	ucugucugucuugcucccaccgg	agagggagagacauaggcugagguuguuccuuuauucaaucugucugucuugcucccaccgg
chr15_35289	12	chr15_35289	12	1	7	4	0	0	0	0.04	0.36	0.21	0	0	0	gagcuggccuugacuuugaguuuug	aagcucaaucucuggccaccaucagaagcuuucaauccccugagcuggccuugacuuugaguuuug
chr17_38174	12	chr17_38174	12	4	2	2	0	4	0	0.15	0.1	0.1	0	0.28	0	cgggcugacacaccugagauug	cgggcugacacaccugagauugucccuggacgcucaccauucucagguuugacaguccugg
chr1_373	12	chr1_373	12	4	2	1	2	3	0	0.15	0.1	0.05	0.12	0.21	0	auuugugcuuggcucugucac	gacagguacagggacaaaucccguuaauaaguaagaggauuugugcuuggcucugucac
chr2_5921	12	chr2_5921	12	2	5	2	0	3	0	0.07	0.26	0.1	0	0.21	0	ccaaucgccgucuuugag	ccaaucgccgucuuugagguauggggguggugggcgggggggggcuucguggacacuucagugaccugggggaggucgggg
chr2_7427	12	chr2_7427	12	2	1	5	4	0	0	0.07	0.05	0.26	0.24	0	0	gaggaggagggaagaaaggcug	gaggaggagggaagaaaggcugcugcuguucuucucgcagucuuccagcccucccccugc
chr3_8841	12	chr3_8841	12	4	0	0	8	0	0	0.15	0	0	0.48	0	0	uuggaccucgccucgcugcgc	gccccgaggaggggcccaacuccggaggggccggcgagcucgucguccgggaguuggaccucgccucgcugcgc
chr7_19441	12	chr7_19441	12	0	3	7	1	1	0	0	0.16	0.36	0.06	0.07	0	ugaggcucaggaugggaacagu	ugaggcucaggaugggaacagucugcugugcgccuguuccuugacuguggaccaga
chr7_19940	12	chr7_19940	12	0	0	0	0	12	0	0	0	0	0	0.83	0	cgacugagucuggaaaaucccucu	agggauucucguacgcagucaccauucauuugauggcgacugagucuggaaaaucccucu
chrAEMK02000452.1_41602	12	chrAEMK02000452.1_41602	12	7	0	4	0	1	0	0.26	0	0.21	0	0.07	0	ccaggaacggugcacccc	ccaggaacggugcacccccgccgggcgcaggggcggcccugggcuggggaggguggguuccugguc
chr4_11730	12	chr4_11730	12	2	5	0	0	4	1	0.07	0.26	0	0	0.28	0.07	agaaagggcuuggcagca	cugacagcuucugcacaagaaagggcuuggcagca
chr5_12698	12	chr5_12698	12	0	0	0	10	1	1	0	0	0	0.6	0.07	0.07	uccagacugugcgccgcccccc	uccagacugugcgccgcccccccagucucaggaagggagaggcagaagagggggcgcacaccgggguc
chr6_15793	12	chr6_15793	12	0	0	3	1	7	1	0	0	0.15	0.06	0.48	0.07	agccgggcaccuuccuccacagc	agugggggggugggggcaagugcagggcucugcucagcaggaggccuguuuccagccgggcaccuuccuccacagc
chr6_17012	12	chr6_17012	12	3	1	4	3	0	1	0.11	0.05	0.21	0.18	0	0.07	ugugugagcaucugcguggacugu	gguccccgcgcgugcgcacacacagcuugagaguggagggugugugugagcaucugcguggacugu
chr7_18849	12	chr7_18849	12	1	8	0	0	2	1	0.04	0.42	0	0	0.14	0.07	cuaccacugccucccgccaga	cggcguggaggcaggggagggcggggcgggccggcagaggagaggccggccucugagucccuaccacugccucccgccaga
chr9_24734	12	chr9_24734	12	5	0	1	1	4	1	0.18	0	0.05	0.06	0.28	0.07	guugaugauguagcugauu	ucagcggccucgggaacuguguugaugauguagcugauu
chr12_27756	12	chr12_27756	12	2	4	3	1	0	2	0.07	0.21	0.15	0.06	0	0.13	cugcugugauguuugcugagc	cugcugugauguuugcugagcugagugaguuggguugggggagggaugggggga
chr17_38474	12	chr17_38474	12	2	0	4	1	3	2	0.07	0	0.21	0.06	0.21	0.13	ucgcacagcuggugggucuucc	gagacccaccuggggcugagccgccaaaggcuugaugaggucgcacagcuggugggucuucc
chr6_17796	12	chr6_17796	12	2	1	5	0	2	2	0.07	0.05	0.26	0	0.14	0.13	caucgcaccugagaccuggaggc	caucaggucugguguguaaggcuuuaacauaaacugagucaucgcaccugagaccuggaggc
chrAEMK02000328.1_41956	12	chrAEMK02000328.1_41956	12	2	1	2	0	5	2	0.07	0.05	0.1	0	0.34	0.13	ugggcgcguucagcuucugaggc	uuuaggagcuggcgcguccccggugcuucaccaagcugggcgcguucagcuucugaggc
chr3_8379	12	chr3_8379	12	7	0	2	0	0	3	0.26	0	0.1	0	0	0.2	cugcccuuggcuccuccagauuu	cugggggagucagguggccagugugggauuuucaccacugcccuuggcuccuccagauuu
chr3_9002	12	chr3_9002	12	0	1	1	7	0	3	0	0.05	0.05	0.42	0	0.2	ucgugucgguggccgccccuc	cuggcguugacgcggaccgacuuguccccgggcagaagaccaggcgcucgugucgguggccgccccuc
chr9_23872	12	chr9_23872	12	1	5	0	0	3	3	0.04	0.26	0	0	0.21	0.2	gcuagucgugucucuugggcag	guuugagaggugugacuaccagucagcgugugaucugcuagucgugucucuugggcag
chr11_26577	12	chr11_26577	12	0	0	5	1	2	4	0	0	0.26	0.06	0.14	0.27	uucccagaacgcaagacucu	uucccagaacgcaagacucuagaagcacaucugcagucuuuugcauuccggaga
chr15_35333	12	chr15_35333	12	0	4	0	4	0	4	0	0.21	0	0.24	0	0.27	aagcccggccguacccugcagg	ugugaggguacguuuggggcuuggccggggacugaagcccggccguacccugcagg
chr3_8690	12	chr3_8690	12	1	2	1	4	0	4	0.04	0.1	0.05	0.24	0	0.27	acgugggccaguggcuguugag	acgugggccaguggcuguugaggcagcggcggcggcagccaggguccgcgcca
chr4_10968	12	chr4_10968	12	0	6	2	0	0	4	0	0.31	0.1	0	0	0.27	uuuucucucucccuuggucagg	uuuucucucucccuuggucaggucgggaaaagcggacauuccucuguggaagaugcucaggccaccauggagcuguacaaguug
chr10_24787	12	chr10_24787	12	1	0	2	2	2	5	0.04	0	0.1	0.12	0.14	0.34	gggaaugaugauuucucag	gcaggcaucuucccggaccuggagauaaccuuguguaaaaccuccacgccggcgccuccacagggaaugaugauuucucag
chr9_24479	12	chr9_24479	12	0	0	3	1	3	5	0	0	0.15	0.06	0.21	0.34	uggggugugcucagagcaag	uggggugugcucagagcaaggggcaugaaaaaauggcuccucuguugauaacauacacaaaag
chr6_15340	12	chr6_15340	12	0	1	5	0	0	6	0	0.05	0.26	0	0	0.4	aaacccacuccucucuguagg	aaacccacuccucucuguagggagauggucccugcaggguaggagcuggguuaua
chr7_20267	12	chr7_20267	12	3	0	1	1	0	7	0.11	0	0.05	0.06	0	0.47	caggggcuggaggcucgaccu	caggggcuggaggcucgaccuuccccagcccugagcucgcugccucccauccccuagg
chr11_26441	11	chr11_26441	11	0	7	0	0	4	0	0	0.36	0	0	0.28	0	cgcagggucuuccgacugucacc	agacagacggggccagcugggcucgggcagcgcagggucuuccgacugucacc
chr12_27821	11	chr12_27821	11	0	4	2	0	5	0	0	0.21	0.1	0	0.34	0	cagggugggagaaggcuugguag	gccaagcgccgccaucccagggcugacacaaaggucugugcccggggcagggugggagaaggcuugguag
chr12_27822	11	chr12_27821	11	0	4	2	0	5	0	0	0.21	0.1	0	0.34	0	cagggugggagaaggcuugguag	gccaagcgccgccaucccagggcugacacaaaggucugugcccggggcagggugggagaaggcuugguag
chr14_32927	11	chr14_32927	11	1	3	1	3	3	0	0.04	0.16	0.05	0.18	0.21	0	uucaccaucucugggcagcuuc	uacuguccagccuuggccugcaugcuccccaugccagagcauucaccaucucugggcagcuuc
chr14_33129	11	chr14_33129	11	2	9	0	0	0	0	0.07	0.47	0	0	0	0	cccgccggguccgccccca	ggcugcggaaccucgcgaagcccuagccgccugacggcgccuccuccuccugcuccccgccggguccgccccca
chr14_34326	11	chr14_34326	11	0	5	2	0	4	0	0	0.26	0.1	0	0.28	0	ucuggcugcuauggcccccucc	aggugccauucugagggccaggaguuugauuaugugucacucuggcugcuauggcccccucc
chr15_35466	11	chr15_35466	11	8	0	3	0	0	0	0.29	0	0.15	0	0	0	cggggggcggcuguccuggugc	cggggggcggcuguccuggugcgucccuggcugcacgggccuggcgccccucggu
chr16_37072	11	chr16_37071	11	6	0	4	0	1	0	0.22	0	0.21	0	0.07	0	ggggucggggcggucggg	ugaugggccugagguuggccguccacauuaaggguucagagggagaggguggaggcaggggucggggcggucggg
chr16_37071	11	chr16_37071	11	6	0	4	0	1	0	0.22	0	0.21	0	0.07	0	ggggucggggcggucggg	ugaugggccugagguuggccguccacauuaaggguucagagggagaggguggaggcaggggucggggcggucggg
chr17_38264	11	chr17_38264	11	6	5	0	0	0	0	0.22	0.26	0	0	0	0	cgggccugcaccucccccuuuucu	gggggugggcgggcgacgggccccgaggaccgcuaccuuccccgggccugcaccucccccuuuucu
chr1_2820	11	chr1_2820	11	2	2	7	0	0	0	0.07	0.1	0.36	0	0	0	gcaauuuagguuaaugacugucu	gagguucauuauccugaauuacauuuucaaaugggagugcaauuuagguuaaugacugucu
chr1_4122	11	chr1_4122	11	0	0	0	0	11	0	0	0	0	0	0.76	0	gccuugggacuuggggac	gcccgugucacaggugcugaaccgccgaggggagcuggggcuccuggcuccucucugagaagccuugggacuuggggac
chr2_4999	11	chr2_4999	11	1	1	1	2	6	0	0.04	0.05	0.05	0.12	0.41	0	ccugggggucugaggggc	cuccgccaggucagcagaggguaacgggcgggagauuugggaaacacuggccgagacucccugggggucugaggggc
chr2_5972	11	chr2_5972	11	4	3	2	2	0	0	0.15	0.16	0.1	0.12	0	0	uugugaucuggcaaauaucggc	cgauauuugccagaucacaaccagggagguucugguugugaucuggcaaauaucggc
chr2_7468	11	chr2_7468	11	1	0	6	0	4	0	0.04	0	0.31	0	0.28	0	ucaccgaccgccgggcggcagg	cgcuccccgccgggcguguggagucguugcuggcgcgacucaccgaccgccgggcggcagg
chr3_9596	11	chr3_9596	11	2	5	3	1	0	0	0.07	0.26	0.15	0.06	0	0	cucggcgaugaggaaccg	cuuccgguccccgcgcgggccgcaaucugugcucaagcccugccucggcgaugaggaaccg
chr4_10258	11	chr4_10258	11	0	1	3	4	3	0	0	0.05	0.15	0.24	0.21	0	gugagggggcugcccaggagc	gugagggggcugcccaggagcuggaggccugcgggccccgccagcaagccuggccuccccaccg
chr4_11566	11	chr4_11566	11	0	4	7	0	0	0	0	0.21	0.36	0	0	0	ugggucucugucuccuccccucuc	gaggauggaggagaggccccggaggccccugggauugauccugagaagccugggucucugucuccuccccucuc
chr5_14278	11	chr5_14278	11	0	8	3	0	0	0	0	0.42	0.15	0	0	0	uugguagauguaggaagacauu	uuucuucuuuaguaguuuuccaaaguggcacccuuuugguagauguaggaagacauu
chr7_20871	11	chr7_20871	11	5	2	0	4	0	0	0.18	0.1	0	0.24	0	0	uagagggcugggacugugcacu	uagagggcugggacugugcacuauauuuguguguaugugugugccucucucugcucuc
chr8_21304	11	chr8_21304	11	2	5	3	0	1	0	0.07	0.26	0.15	0	0.07	0	gccgggcagcuuccggga	gccgggcagcuuccgggaugagcagcucccagcgcagauggcuc
chr8_21751	11	chr8_21751	11	1	2	0	0	8	0	0.04	0.1	0	0	0.55	0	uaagugcuuccauguuuuaguaga	aacuuuaacaugggagugcuuucugugaguuuuaaaguaagugcuuccauguuuuaguaga
chr15_35113	11	chr15_35113	11	0	1	8	0	1	1	0	0.05	0.41	0	0.07	0.07	augcagggggucguggcucg	aggggcacucaccaucacagcaggguucuucaccgugaugcagggggucguggcucg
chr4_10672	11	chr4_10672	11	3	1	0	2	4	1	0.11	0.05	0	0.12	0.28	0.07	cagggaauaguuuagaaa	cagggaauaguuuagaaauggaaacaaugcccccaauaaaggacuuguucuuggc
chr2_6979	11	chr2_6979	11	0	0	3	0	6	2	0	0	0.15	0	0.41	0.13	cggggguggcgcggcuggg	cggggguggcgcggcuggggcuggccaggaccccgccucccgcgguaccacccgcg
chr5_12809	11	chr5_12809	11	1	0	0	0	8	2	0.04	0	0	0	0.55	0.13	uuccugggccggcugagggcuu	uggccuugggucuggcaggagcaggcgugacuucuguuccugggccggcugagggcuu
chr6_14923	11	chr6_14923	11	4	3	1	1	0	2	0.15	0.16	0.05	0.06	0	0.13	uggagugaugacauuuaagcugaug	ggagaguaagguggguuuuucuagguagucaggaaaggcucuucuggagugaugacauuuaagcugaug
chr6_17013	11	chr6_17013	11	3	1	5	0	0	2	0.11	0.05	0.26	0	0	0.13	cggcugcgggccgggacu	cggcugcgggccgggacuugccugauccggguccgcgggcgau
chr14_33374	11	chr14_33374	11	2	0	3	1	2	3	0.07	0	0.15	0.06	0.14	0.2	ucuaucggguguaccuguccucc	agggcagggccacccgcugauggcagggauggcaucagagccucuaucggguguaccuguccucc
chr2_4171	11	chr2_4171	11	1	0	3	3	0	4	0.04	0	0.15	0.18	0	0.27	acuggaucgucucuggggagcc	cuccccagagucgauccagugccuccuccagcuccugcacuggaucgucucuggggagcc
chr3_7606	11	chr3_7606	11	4	1	0	2	0	4	0.15	0.05	0	0.12	0	0.27	cucggagcugcagaaagcc	cucggagcugcagaaagccgugagugcccgcgggcgggcagcgggcgggcgguugggcucuggcggcuccaucug
chr9_23020	11	chr9_23020	11	2	2	3	0	0	4	0.07	0.1	0.15	0	0	0.27	ugcugugaugucugcuucugauc	ugcugugaugucugcuucugaucucagccagaccaggcaaggugaugggguggggauuugugcgug
chr3_8638	11	chr3_8638	11	0	1	0	5	0	5	0	0.05	0	0.3	0	0.34	ucucuccuacacuacugcagu	ucucuccuacacuacugcaguauucauuuuaauacuccugcguaguguagaggagaaa
chr3_9014	11	chr3_9014	11	2	1	1	1	1	5	0.07	0.05	0.05	0.06	0.07	0.34	cucugccacaccacccgccugc	aggcgggugcugggaggaggcagaggggcuucuggggucugcucucugccacaccacccgccugc
chr8_21096	11	chr8_21096	11	1	0	0	2	0	8	0.04	0	0	0.12	0	0.54	agaugggaauucacucugg	agaugggaauucacucuggauuauccagcugggcacaggguagucauagguguccuuggaaugaguaggggcgguaguucccauugug
chr12_27132	10	chr12_27132	10	0	3	7	0	0	0	0	0.16	0.36	0	0	0	agguugggguggagcaggacgc	agguugggguggagcaggacgccacaucaggggacagguccugucccggcugccugu
chr12_28074	10	chr12_28074	10	4	2	1	3	0	0	0.15	0.1	0.05	0.18	0	0	uguggcggccgcggaucucccag	uguggcggccgcggaucucccagcucauggggguccgucaggccgccucagc
chr14_33666	10	chr14_33666	10	3	0	1	1	5	0	0.11	0	0.05	0.06	0.34	0	uucuccaaggacacucugucucu	ugaggugugaccuugaacauuuaguuauaccaaucaccuggucugguuuucuccaaggacacucugucucu
chr17_38067	10	chr17_38067	10	4	0	0	5	1	0	0.15	0	0	0.3	0.07	0	ucccucggccccuauagacgcgccc	gcgcgucgggguccgcggcgaggccaagcccccucccucggccccuauagacgcgccc
chr2_4475	10	chr2_4475	10	2	2	4	2	0	0	0.07	0.1	0.21	0.12	0	0	ugucucggccccugaagacuugu	acgucuucagggggugcugacgcccggcugagcugcaaauggugucucggccccugaagacuugu
chr5_14668	10	chr5_14668	10	4	0	5	1	0	0	0.15	0	0.26	0.06	0	0	uggggccagcucuccgggcgugc	gagcccgagccacccccagccagcgccccuucgagcccaggagccaggcgggcuggggccagcucuccgggcgugc
chr6_16081	10	chr6_16081	10	0	4	1	5	0	0	0	0.21	0.05	0.3	0	0	cccugcgggucggccucugc	uuacgucgauccccgggaguaagcguuuccggucauucauucucccugcgggucggccucugc
chr6_16554	10	chr6_16554	10	0	0	6	4	0	0	0	0	0.31	0.24	0	0	ugugcucgcaguggcuaucuggg	caggggucaccagcaagcacaggucagagcaaagccagaaaccugugcucgcaguggcuaucuggg
chr7_18933	10	chr7_18933	10	3	4	0	3	0	0	0.11	0.21	0	0.18	0	0	uuuuuugcuggaacauuucuggu	uggaaauguucuagccaaaaaaguuugccaagaaccauugugucuuuuuuuuuugcuggaacauuucuggu
chr7_20603	10	chr7_20603	10	3	0	7	0	0	0	0.11	0	0.36	0	0	0	uggaugucugggacccugcguc	uggaugucugggacccugcgucaggagcggggcuggccuguucagggcccuaagaaagcuaaug
chr9_24019	10	chr9_24019	10	0	7	3	0	0	0	0	0.36	0.15	0	0	0	ggaaaugauggugcuacuggugcu	ggaaaugauggugcuacuggugcuguuggacccccuaucucacugguccugcugaugcuucuggcuuccuuggugcugc
chr10_25027	10	chr10_25027	10	1	0	2	2	4	1	0.04	0	0.1	0.12	0.28	0.07	ugacuggcugcucucucccccauc	cuuggugaguagcgcagugcugagucugggcaaggaggccugaaggucaggcccagcccugacuggcugcucucucccccauc
chr14_33620	10	chr14_33620	10	2	0	3	2	2	1	0.07	0	0.15	0.12	0.14	0.07	cuccgcuuagggccuggaccag	ggccgggccugggcaggugggugucgcgccccaguccccuccgcuuagggccuggaccag
chr15_36546	10	chr15_36546	10	4	1	0	1	3	1	0.15	0.05	0	0.06	0.21	0.07	cuuucggaccgcuucggagcagg	cccucuggccucggagccgcggggagguggugcuucguugucccggacaggcguaaccuccccuuucggaccgcuucggagcagg
chr1_1969	10	chr1_1969	10	3	3	3	0	0	1	0.11	0.16	0.15	0	0	0.07	gcgcgucuuuuggugcucugc	agggcagcagaagaaggacccacccugagggcgcgucuuuuggugcucugc
chr3_9976	10	chr3_9976	10	3	1	1	4	0	1	0.11	0.05	0.05	0.24	0	0.07	cgcggcucucaaccugacgggg	cugggagggaggccgggcaggcuguggagcggcgcggcucucaaccugacgggg
chr6_14902	10	chr6_14902	10	4	3	1	0	0	2	0.15	0.16	0.05	0	0	0.13	uugccgggagcugguggcgagc	uugccgggagcugguggcgagcucgugcccagagcuucugcaccgucucucuggccu
chr6_18232	10	chr6_18232	10	3	0	0	2	3	2	0.11	0	0	0.12	0.21	0.13	cccgggucuguccucuggcagg	agcccgaggacgacccgcccugagcaggccgugaccccgggucuguccucuggcagg
chr16_37468	10	chr16_37468	10	0	0	0	1	6	3	0	0	0	0.06	0.41	0.2	ugaggggcuuggacaaaccuuugc	aggguuucucuccuccucauucuuucuguuaaaaugaggggcuuggacaaaccuuugc
chr2_6014	10	chr2_6014	10	0	0	0	4	3	3	0	0	0	0.24	0.21	0.2	ucugaccugugcucucucugcag	gccagagggggugggaaucagggggguggcuaccaagagggaaggccuguguggauccagccucugaccugugcucucucugcag
chr6_14970	10	chr6_14970	10	2	2	1	1	1	3	0.07	0.1	0.05	0.06	0.07	0.2	guggggugcucggggccuuggagg	guggggugcucggggccuuggagggcgcugggggcacaggagugggcccccagcccuggccucacccaggccgccaccuccu
chr6_17388	10	chr6_17387	10	0	0	2	5	0	3	0	0	0.1	0.3	0	0.2	uggaggcggggcugccgggucu	uggaggcggggcugccgggucugggggucgggggcccauccuugccccgcgaaacccgggggagcguccggggaccgcaguccggu
chr6_17387	10	chr6_17387	10	0	0	2	5	0	3	0	0	0.1	0.3	0	0.2	uggaggcggggcugccgggucu	uggaggcggggcugccgggucugggggucgggggcccauccuugccccgcgaaacccgggggagcguccggggaccgcaguccggu
chr6_15303	10	chr6_15303	10	1	0	0	5	0	4	0.04	0	0	0.3	0	0.27	cccggccgggcccgcccc	ggcggcgccgggaccuggcagcgacuccucccggcccccgggcccgagcggccggccgaggccccgccccccggccgggcccgcccc
chr2_7529	10	chr2_7529	10	1	0	4	0	0	5	0.04	0	0.21	0	0	0.34	uccccaggggcuuuggcugugc	uccccaggggcuuuggcugugccgugaagcuucaggcacagccugcuggcaucgggcacc
chr16_36577	10	chr16_36577	10	0	3	1	0	0	6	0	0.16	0.05	0	0	0.4	agagcugagggcagaguccaggacc	uccugggcccagccccaguucugccagaagcagagcugagggcagaguccaggacc
chrAEMK02000452.1_41642	10	chrAEMK02000452.1_41642	10	0	0	1	2	0	7	0	0	0.05	0.12	0	0.47	cuggcucugcggguacugg	agaugauggagcccgacacgggcggcaggucgcgcacguggcucaucuugcacgccuggcucugcggguacugg
chr3_8209	10	chr3_8209	10	0	2	0	0	0	8	0	0.1	0	0	0	0.54	uucuugaucuucuggacg	cccagaagucgguagaaugcuucuugaucuucuggacg
chr11_26306	9	chr11_26306	9	3	2	0	4	0	0	0.11	0.1	0	0.24	0	0	cuuccaaagacugguaggugagu	cuuccaaagacugguaggugaguguacgucuucccuuagagugccaccuauaagaauuugggaaag
chr12_27157	9	chr12_27157	9	0	2	0	7	0	0	0	0.1	0	0.42	0	0	ccuuuccgcuucucuccucagc	ugggggugacggagcgggacuccagccuuucucaucggggccuuuccgcuucucuccucagc
chr12_27738	9	chr12_27738	9	1	1	4	0	3	0	0.04	0.05	0.21	0	0.21	0	auucaaauucuugcucuggua	auucaaauucuugcucugguaaagagcagagcaagaauuugaagua
chr12_28096	9	chr12_28096	9	0	1	3	5	0	0	0	0.05	0.15	0.3	0	0	cggcauauggagguuccc	gucuuuuaggccugcacucgcggcauauggagguuccc
chr13_29305	9	chr13_29305	9	2	0	5	2	0	0	0.07	0	0.26	0.12	0	0	uuggaauuuugcaguguccacc	ugggcaaugcacagcuccaauggauuccaguuauguccccuuggaauuuugcaguguccacc
chr13_29306	9	chr13_29305	9	2	0	5	2	0	0	0.07	0	0.26	0.12	0	0	uuggaauuuugcaguguccacc	ugggcaaugcacagcuccaauggauuccaguuauguccccuuggaauuuugcaguguccacc
chr13_30353	9	chr13_30353	9	9	0	0	0	0	0	0.33	0	0	0	0	0	caccaccaggggaacuuccaau	caggaguucccucuggugguacagcagugacaacccacugcaccaccaggggaacuuccaau
chr14_32607	9	chr14_32607	9	0	1	4	3	1	0	0	0.05	0.21	0.18	0.07	0	cccaggcacaucucugauccagg	uggcucagggauggcuggggguuggggggugccugcucagggucccuccacacccccaggcacaucucugauccagg
chr14_33207	9	chr14_33207	9	0	4	5	0	0	0	0	0.21	0.26	0	0	0	ugugugcugagaguguca	aucacucucagccccugggugugugcugagaguguca
chr14_33917	9	chr14_33917	9	7	2	0	0	0	0	0.26	0.1	0	0	0	0	ugagacugugcuccuugaaaac	ugagacugugcuccuugaaaacucugaugcucaaggaacacugucuuccu
chr15_36140	9	chr15_36140	9	0	8	1	0	0	0	0	0.42	0.05	0	0	0	cucugcggagacugaauu	uucagaucuuccugagaacugaguugagaugcaagucucucugcggagacugaauu
chr18_39327	9	chr18_39327	9	0	0	0	5	4	0	0	0	0	0.3	0.28	0	cacccucuauggccucugcagg	cacccucuauggccucugcaggagacagggcucaaggugaaccagccggcguccuuugcggugcagcugaacggugcu
chr1_3638	9	chr1_3638	9	0	0	0	9	0	0	0	0	0	0.54	0	0	acaccgccuggaggcaacaccuc	gggggcggccuccgggcggucuccucaggcuuccccggacaccgccuggaggcaacaccuc
chr2_4363	9	chr2_4363	9	2	0	0	1	6	0	0.07	0	0	0.06	0.41	0	uuguucccucugccuccucagc	caaggaggagagguggaagaggugagggaaccaggcgcuagggccggauaccagcucacccuuguucccucugccuccucagc
chr2_5256	9	chr2_5256	9	2	1	6	0	0	0	0.07	0.05	0.31	0	0	0	cgaccucggagcagaacc	cgaccucggagcagaaccuggccuccgcuccgccccgccgag
chr2_5898	9	chr2_5898	9	5	0	4	0	0	0	0.18	0	0.21	0	0	0	ucugcacauguagauacacgc	gugugugugcgugugcccgugcgugugcgugcugcaucugcacauguagauacacgc
chr2_6002	9	chr2_6002	9	3	3	2	1	0	0	0.11	0.16	0.1	0.06	0	0	uuucccacuuucugcccugcagc	ucagcgggcaggacugggcacaggugaguggccugaucuuccuuucccacuuucugcccugcagc
chr3_7849	9	chr3_7849	9	3	1	3	2	0	0	0.11	0.05	0.15	0.12	0	0	uugccucuccgcccuggcccagg	gggggcagcuggggagcaggcugggugaccuuugacccuugccucuccgcccuggcccagg
chr3_8524	9	chr3_8524	9	0	2	1	3	3	0	0	0.1	0.05	0.18	0.21	0	aaaucucugcaggcaaaugug	aaaucucugcaggcaaaugugauguuacuaaagaaaucacacacuuaccuguagagauucua
chr3_9962	9	chr3_9962	9	0	4	5	0	0	0	0	0.21	0.26	0	0	0	cagcucucugauucuuuucccuuu	gggagggaagaguuggaggaguugcagaguaacaaccacuugcagcucucugauucuuuucccuuu
chr4_10373	9	chr4_10373	9	1	0	7	0	1	0	0.04	0	0.36	0	0.07	0	acaggaccgaggcugauugauu	ugaaucagccacuggucauugaguugggguuuggaagaccaucuaacaggaccgaggcugauugauu
chr4_10466	9	chr4_10466	9	0	0	0	0	9	0	0	0	0	0	0.62	0	auaggcacugaacuggaugaau	auaggcacugaacuggaugaaucagacguagauguuaucuguuuaagcaucuaggcagugucuuuca
chr4_11932	9	chr4_11932	9	3	1	3	1	1	0	0.11	0.05	0.15	0.06	0.07	0	agaggaggaaaacagagccagg	caggcuguguccucucccugcucuguaaccaugacacagagaggaggaaaacagagccagg
chr6_15015	9	chr6_15015	9	2	1	3	0	3	0	0.07	0.05	0.15	0	0.21	0	ccucauccugccucuucccucaga	ugagguaggaggagagcagggaagggcugggcuggcaggguggcaacacaagggcugccucauccugccucuucccucaga
chr6_17179	9	chr6_17179	9	3	0	2	0	4	0	0.11	0	0.1	0	0.28	0	ucucccaacccuuguaccagugc	ucucccaacccuuguaccagugcgugccucagucccugguacaggaauggggggca
chr6_17503	9	chr6_17503	9	0	4	4	0	1	0	0	0.21	0.21	0	0.07	0	cguggagcugaaaaacaa	cguggagcugaaaaacaaguacggguuucucagacucggggag
chr6_18216	9	chr6_18216	9	0	9	0	0	0	0	0	0.47	0	0	0	0	uuucuucuccgccuuccucagc	gcaggaggaguggagucgggguugguuucugauuucuucuccgccuuccucagc
chr7_18937	9	chr7_18937	9	5	3	0	0	1	0	0.18	0.16	0	0	0.07	0	cgggacacgcacccucugcagu	ugcuuugggggcagcaaccuccccgagaucaaccuccgggacacgcacccucugcagu
chr7_20345	9	chr7_20345	9	2	5	0	2	0	0	0.07	0.26	0	0.12	0	0	auggcggcugcgggaggggg	auggcggcugcgggaggggguccuugcuuuucagcucccccccucgcucgccuucu
chr9_22868	9	chr9_22868	9	1	2	1	0	5	0	0.04	0.1	0.05	0	0.34	0	uggcgguugggcgcucgcggcuc	uggcgguugggcgcucgcggcucucucuucuuccucccucccucucgagccugagccugggcucaccccgcuccg
chr12_28994	9	chr12_28994	9	0	0	2	4	2	1	0	0	0.1	0.24	0.14	0.07	uucucuccuuugcucucucagc	ucugggggcuuguggggagugggcagagguugggaggaccugaccuuggccuucucuccuuugcucucucagc
chr14_34463	9	chr14_34463	9	4	0	1	1	2	1	0.15	0	0.05	0.06	0.14	0.07	uaggauuugaaaggauuaugug	uaggauuugaaaggauuaugugauguuucaaaauaucacauaauccuuucaaauagccuugg
chr16_37351	9	chr16_37351	9	0	2	3	1	2	1	0	0.1	0.15	0.06	0.14	0.07	ucagacagaucgaggacccccu	ucagacagaucgaggacccccuguuacucguggagucguaggaggaagcucacgugaauuguauggcc
chr5_13724	9	chr5_13724	9	3	0	0	4	1	1	0.11	0	0	0.24	0.07	0.07	uugcccgcgucucccguccagg	ugggagagaagccaaggccggcgucuccgcggcucggccgacucgcccuugcccgcgucucccguccagg
chr6_17451	9	chr6_17451	9	1	1	0	3	3	1	0.04	0.05	0	0.18	0.21	0.07	gccugggggcugagggcg	gccugggggcugagggcgggggaccagggagcucaaggagucucugagggcac
chrAEMK02000452.1_41556	9	chrAEMK02000452.1_41556	9	4	0	2	2	0	1	0.15	0	0.1	0.12	0	0.07	ugcugcagccacugcuggucuggag	ugcugcagccacugcuggucuggaggccacgcguggagacccgcugggcugcagcugca
chr13_29161	9	chr13_29161	9	3	3	1	0	0	2	0.11	0.16	0.05	0	0	0.13	uucuuugcuggauggcauuucucu	cugggugccaccagggaagaaucacacuagcugauucuuugcuggauggcauuucucu
chr5_12607	9	chr5_12607	9	2	4	0	1	0	2	0.07	0.21	0	0.06	0	0.13	ugcgucucgguccuacccccagg	gagggguggguagagcugcggaaggcaggccugacugcgucucgguccuacccccagg
chr9_23955	9	chr9_23955	9	0	0	0	0	7	2	0	0	0	0	0.48	0.13	uacguagugcugaagaug	uacguagugcugaagaugguaaauaucuuuauguauuugcaugucug
chr2_6991	9	chr2_6991	9	0	1	3	0	2	3	0	0.05	0.15	0	0.14	0.2	uuggguagcuugggcuggga	uuggguagcuugggcugggacacugcacccccagagccccaggccacccugca
chr6_15330	9	chr6_15330	9	3	1	2	0	0	3	0.11	0.05	0.1	0	0	0.2	ugccugcuccggcgcccccagc	ugccugcuccggcgcccccagcugcuucagugucuugccuccugggagccccuggcgggccgc
chr12_27191	9	chr12_27191	9	0	4	1	0	0	4	0	0.21	0.05	0	0	0.27	uggcucccggcuccuucugga	gagaagggaagccuggaguuggggugaaggugccuggcucccggcuccuucugga
chrX_40337	9	chrX_40337	9	2	0	0	3	0	4	0.07	0	0	0.18	0	0.27	uacagcaucgccgugucucaucag	ggugagcacagguccccugugggggucgggggagggcauggggccacgugacccuacagcaucgccgugucucaucag
chr10_24941	9	chr10_24941	9	0	0	4	0	0	5	0	0	0.21	0	0	0.34	gugucugcagggcaagcugg	agcauccccuggugcagccucauuugccccacgugucugcagggcaagcugg
chr7_19341	9	chr10_24941	9	0	0	4	0	0	5	0	0	0.21	0	0	0.34	gugucugcagggcaagcugg	agcauccccuggugcagccucauuugccccacgugucugcagggcaagcugg
chr3_10158	9	chr3_10158	9	0	0	0	0	1	8	0	0	0	0	0.07	0.54	uggcugguuacgaauacgu	guguucgggucgucauggcugguuacgaauacgu
chr9_24068	9	chr9_24068	9	0	0	0	0	0	9	0	0	0	0	0	0.61	ugugguucucuauaaauauuau	aauauuuauagagaaccacauauauaaagaaccaugugguucucuauaaauauuau
chr11_26059	8	chr11_26059	8	1	0	3	4	0	0	0.04	0	0.15	0.24	0	0	uggcuguggggagacggc	caguucccuggagagaacuaggguuggcuguggggagacggc
chr12_27731	8	chr12_27731	8	0	8	0	0	0	0	0	0.42	0	0	0	0	ugaagggcuggguaauguugcauc	aguuucauugcuaagcgucucucuaaaggagcggucuuugaagggcuggguaauguugcauc
chr12_27732	8	chr12_27731	8	0	8	0	0	0	0	0	0.42	0	0	0	0	ugaagggcuggguaauguugcauc	aguuucauugcuaagcgucucucuaaaggagcggucuuugaagggcuggguaauguugcauc
chr13_30140	8	chr13_30140	8	3	3	2	0	0	0	0.11	0.16	0.1	0	0	0	aagccagagucaggggacacuguu	aagccagagucaggggacacuguuauucauaugacugaucagggucccuugauuauggcuuuc
chr13_30538	8	chr13_30538	8	0	8	0	0	0	0	0	0.42	0	0	0	0	uuugaucauagagacacc	uuugaucauagagacaccagcuuuguguacgucuaauguaacacgagugccguggcuuucuggguuuuuuu
chr13_32012	8	chr13_32012	8	1	7	0	0	0	0	0.04	0.36	0	0	0	0	uucugaucucuucccucccuccuu	agggaggggaaagaggagaaaagcccgaauuuuagcaaauccacaauacauuuucugaucucuucccucccuccuu
chr14_32303	8	chr14_32303	8	2	0	1	5	0	0	0.07	0	0.05	0.3	0	0	cucuggacugggacagug	ccgucaguguccgggugacauuccuggaaccucuggacugggacagug
chr14_34437	8	chr14_34437	8	0	0	0	0	8	0	0	0	0	0	0.55	0	ccugugcucugaugagga	ccugugcucugaugaggacuuuaucuucucagguccaggaa
chr7_18889	8	chr14_34437	8	0	0	0	0	8	0	0	0	0	0	0.55	0	ccugugcucugaugagga	ccugugcucugaugaggacuuuaucuucucagguccaggaa
chr14_34565	8	chr14_34565	8	0	2	2	2	2	0	0	0.1	0.1	0.12	0.14	0	gauggaggucucugucugg	gauggaggucucugucuggggugauuuagggcagggagaguguugg
chr15_35017	8	chr15_35017	8	0	0	8	0	0	0	0	0	0.41	0	0	0	ucaaucccuggccucacu	cuaggccagggauuguggguucaaucccuggccucacu
chr15_35428	8	chr15_35428	8	0	0	0	0	8	0	0	0	0	0	0.55	0	aagggggugggcuggggg	aagggggugggcugggggcagcagcauaacaguagggcugcuuuu
chr15_35678	8	chr15_35678	8	3	4	1	0	0	0	0.11	0.21	0.05	0	0	0	agccuguacggggacucuguugc	aacacuuggccuuucaggaaugcaacccaagcaggugcggggcggcagccuguacggggacucuguugc
chr15_36382	8	chr15_36382	8	4	0	2	0	2	0	0.15	0	0.1	0	0.14	0	acgugacugguguuugugcucuu	gaaucagcacaaagacaguuucuguguugcccucauugagacacgugacugguguuugugcucuu
chr16_36866	8	chr16_36866	8	1	3	0	0	4	0	0.04	0.16	0	0	0.28	0	ccuggcuuucaccgucugagacu	ccuggcuuucaccgucugagacuucccucggggcaccccaggaagguccgaggcauccggcgaaugcagggg
chr16_37548	8	chr16_37548	8	2	1	5	0	0	0	0.07	0.05	0.26	0	0	0	uggcgcguccacuccgau	ggggggggagcgguauaaaggaugagaggcagccccggccgggacccgagacguggcgcguccacuccgau
chr17_38217	8	chr17_38217	8	0	6	2	0	0	0	0	0.31	0.1	0	0	0	agaucagaaggugauuguggcu	agaucagaaggugauuguggcuuuggguagauauuaaucagccacagcacugccuggucaga
chr18_39512	8	chr18_39512	8	0	8	0	0	0	0	0	0.42	0	0	0	0	gcagccgcgcagccaccu	gcagcagagagcggcagcggcucgucucggcgccccagaaccgaaaccagcugcagccgcgcagccaccu
chr1_1831	8	chr1_1831	8	1	6	0	0	1	0	0.04	0.31	0	0	0.07	0	ccccuguccuccaggagcuc	gucuucuuaaggauacaggggagaacaagauacaaccccuguccuccaggagcuc
chr1_2247	8	chr1_2247	8	0	0	0	0	8	0	0	0	0	0	0.55	0	uggagcaggugacaggugacaac	uggagcaggugacaggugacaacauccuaucuguccauguugcucaucaccugcaccugcccuuu
chr1_2799	8	chr1_2799	8	4	0	4	0	0	0	0.15	0	0.21	0	0	0	ucaucugcuguauccacucaaucc	ucaucugcuguauccacucaauccagacacagucacuaguggagguggagaugcagauguuu
chr1_947	8	chr1_947	8	0	0	0	0	8	0	0	0	0	0	0.55	0	cugauaguuuuguucucugaacag	guucagguaaaacugcgucugucugaagcuggacugauacugauaguuuuguucucugaacag
chr2_4287	8	chr2_4287	8	1	0	0	0	7	0	0.04	0	0	0	0.48	0	uccucucaggaucucagcccuc	uccucucaggaucucagcccuccagacguaaaggaagaggcuggcugggucccugagaggcc
chr2_6020	8	chr2_6020	8	1	1	6	0	0	0	0.04	0.05	0.31	0	0	0	acccuguccucgcucuccuaga	cuggagggcccgugaucaggcugcuugccuccucccugcacccuguccucgcucuccuaga
chr3_9519	8	chr3_9519	8	6	0	2	0	0	0	0.22	0	0.1	0	0	0	cgcccccccgccccggcg	cggggcugggcgcgcgccccgcagcccagagggccgcccacccgcccccccgccccggcg
chr4_12283	8	chr4_12283	8	0	0	8	0	0	0	0	0	0.41	0	0	0	cagggccaggccucaggcggag	cagggccaggccucaggcggagggggugggcguucggacucugagcuucaaacacuaaguugccgagauccugaacuugcc
chr6_14905	8	chr6_14905	8	4	1	2	0	1	0	0.15	0.05	0.1	0	0.07	0	cauggcaaugaugacuguagcuca	ugcuauugucauugccuccugcucagcucacucaguguagcauggcaaugaugacuguagcuca
chr6_16589	8	chr6_16589	8	3	0	3	0	2	0	0.11	0	0.15	0	0.14	0	ucagcgcugccacuucccgcc	ucagcgcugccacuucccgccacggagccucggcaaguuucagaaucuccccagagcuuagcugcuccaucggcugagugggcgcgggga
chr6_17237	8	chr6_17237	8	0	8	0	0	0	0	0	0.42	0	0	0	0	ucaaggacguggccaucgagu	ucaaggacguggccaucgaguuuacuccggaggagugggccugccuggacccugcccagagg
chr6_17238	8	chr6_17237	8	0	8	0	0	0	0	0	0.42	0	0	0	0	ucaaggacguggccaucgagu	ucaaggacguggccaucgaguuuacuccggaggagugggccugccuggacccugcccagagg
chr7_19001	8	chr7_19001	8	2	0	1	2	3	0	0.07	0	0.05	0.12	0.21	0	guggcuccugugucuccccagu	cagggugcgggggggccuggaggugugagaccccgagagcgaggcccucaccggguggcuccugugucuccccagu
chr7_19766	8	chr7_19766	8	2	0	2	0	4	0	0.07	0	0.1	0	0.28	0	ugcugugcaguaggacccacc	ugcugugcaguaggacccaccgcuuaucuuaucuauucaguggguccuacugcacagcaca
chr8_21851	8	chr8_21851	8	4	3	1	0	0	0	0.15	0.16	0.05	0	0	0	uggacuggaugacaaucugcagg	agaagguuguagcacgugugggccacaggcaaguaguccuccccgcuggcuguggacuggaugacaaucugcagg
chr8_21950	8	chr8_21950	8	0	0	5	3	0	0	0	0	0.26	0.18	0	0	ucacggucacucugcucgcagu	ugugagcagggcugcccugugggcgagcaaaggagcucacggucacucugcucgcagu
chr9_23529	8	chr9_23529	8	0	0	8	0	0	0	0	0	0.41	0	0	0	auggacguugucucccccagc	uguggaugaggaugagccagggggucuggugggcuccauggacguugucucccccagc
chr9_24327	8	chr9_24327	8	0	3	0	3	2	0	0	0.16	0	0.18	0.14	0	ccuggggcacaagcuggg	ccuggggcacaagcuggguggcagguuagacucagcccccagaca
chr9_24380	8	chr9_24380	8	2	0	4	1	1	0	0.07	0	0.21	0.06	0.07	0	uaggguguacuuagauauagaaa	uuuauaucuaaguacacccuuacuaacucuugcuaggguguacuuagauauagaaa
chrAEMK02000264.1_42177	8	chrAEMK02000264.1_42165	8	0	3	5	0	0	0	0	0.16	0.26	0	0	0	aggcugacaagcgggacu	aggcugacaagcgggacuagauccuaggaagggcgccuaaauuuuaggccggcauucgguugccuuu
chrAEMK02000264.1_42165	8	chrAEMK02000264.1_42165	8	0	3	5	0	0	0	0	0.16	0.26	0	0	0	aggcugacaagcgggacu	aggcugacaagcgggacuagauccuaggaagggcgccuaaauuuuaggccggcauucgguugccuuu
chrX_40392	8	chrX_40392	8	0	0	0	0	8	0	0	0	0	0	0.55	0	gucuccggacugcgggcgcacgggg	cccaccccaguccgggacccuaucccaggagcgcaggagaccacucccuaccccagucuccggacugcgggcgcacgggg
chr1_1881	8	chr1_1881	8	1	0	2	1	3	1	0.04	0	0.1	0.06	0.21	0.07	ucuccucucuuugccugcccucag	cggggcgggcaaauugguacaggccucaaauccaaacccucuccucucuuugccugcccucag
chr1_3437	8	chr1_3437	8	1	0	3	3	0	1	0.04	0	0.15	0.18	0	0.07	uguagcuucuggagaucuuugu	uguagcuucuggagaucuuuguuuuagagucaacacggugauuuccaggagauacugg
chr6_16548	8	chr6_16548	8	3	0	1	3	0	1	0.11	0	0.05	0.18	0	0.07	augcaggggaggggguggcgg	ccccucccuuccgcugcaucccgugggucaaggacaaggaugcaggggaggggguggcgg
chr6_17268	8	chr6_17268	8	0	1	1	0	5	1	0	0.05	0.05	0	0.34	0.07	uguggccacaugauucucuguag	ucagagggucugugugucuauacuuuugauaaguguggccacaugauucucuguag
chr9_22947	8	chr9_22947	8	2	0	0	0	5	1	0.07	0	0	0	0.34	0.07	cagacuuguauuuuucugccuucc	caggcagaaguacagucuaaugacugcauccuacauaacaccaugucagacuuguauuuuucugccuucc
chr12_27774	8	chr12_27774	8	0	0	2	1	3	2	0	0	0.1	0.06	0.21	0.13	guagcugaugagauccugucugagg	guagcugaugagauccugucugaggcgaaccccgacccccaguccgagggaucucuggcacaccacau
chr15_35339	8	chr15_35339	8	2	0	4	0	0	2	0.07	0	0.21	0	0	0.13	ucucagccugugcucacugcuc	gugagugagcggggccucggccagggaaggguccagggcccccauggucucagccugugcucacugcuc
chr1_870	8	chr1_870	8	0	0	0	0	6	2	0	0	0	0	0.41	0.13	uaacgaucaugcuggaaaacu	uaacgaucaugcuggaaaacuauuuccuaauuccagcagucuaccguugcu
chr7_18335	8	chr7_18335	8	0	0	2	2	2	2	0	0	0.1	0.12	0.14	0.13	cgaugugaugacaggagccagccc	guugucggcuggagagcaucugguaugaguggccggggugcccgaugugaugacaggagccagccc
chr9_23086	8	chr9_23086	8	0	0	1	5	0	2	0	0	0.05	0.3	0	0.13	ugccuagggcugcgauggagc	ugccuagggcugcgauggagcaaaggagaucugcugcauccagucuaggcucugaagu
chr5_13993	8	chr5_13993	8	3	0	0	2	0	3	0.11	0	0	0.12	0	0.2	cauccucuucugagcccucuga	cauccucuucugagcccucugaggcaccaagagaaaccagagagcgcugaggaggaggug
chr9_23773	8	chr9_23773	8	3	0	1	0	1	3	0.11	0	0.05	0	0.07	0.2	cacgcuugugucguuggaguggc	cccuucucacgccaagugugcgugaguuucugagugcacgcuugugucguuggaguggc
chr6_15302	8	chr6_15302	8	1	3	0	0	0	4	0.04	0.16	0	0	0	0.27	agcagacaaccaagaaugagg	agcagacaaccaagaaugaggcugaucucucagcaccccuccuuuuugugugucuuacag
chr6_17709	8	chr6_17709	8	0	0	0	0	0	8	0	0	0	0	0	0.54	uucuggaguagauggagaggc	uucuggaguagauggagaggcgagagcugcggugcggagggcuggauuccaaccuuucccagaugccuugacuuccuucccaggcgcu
chr11_26728	7	chr11_26728	7	0	0	7	0	0	0	0	0	0.36	0	0	0	agcuucgggaagggaggaugaac	ucuccuccuacuccuccucagccgagggcgccggccgcugcugccuucgagggcgagcuucgggaagggaggaugaac
chr12_27209	7	chr12_27209	7	7	0	0	0	0	0	0.26	0	0	0	0	0	cgcauccugugcuccgccagc	gggcggaugccgagaugcgcacgccccgccgcgcauccugugcuccgccagc
chr13_29749	7	chr13_29749	7	2	2	0	3	0	0	0.07	0.1	0	0.18	0	0	aggguugggcagaggcuuug	gagcuucugcacugucucugucacuauuaggguugggcagaggcuuug
chr13_30665	7	chr13_30665	7	0	1	5	1	0	0	0	0.05	0.26	0.06	0	0	agagggaaagagagagcc	gaauugauuucaucucauaaccgucucugugugggggaggggggagagggaaagagagagcc
chr13_30687	7	chr13_30687	7	0	1	2	4	0	0	0	0.05	0.1	0.24	0	0	aggagcugaggacggaga	cccgucucgcccuccuccugcgcagggcggcgccgggauccuccgcccucugaggaaggagcugaggacggaga
chr13_30696	7	chr13_30696	7	0	0	7	0	0	0	0	0	0.36	0	0	0	guguuggcuuaggggacg	guguuggcuuaggggacgguaagugugccgaggcuaaagggcgcucugugucucagcgcgucccucuuuguuuauugacaccu
chr13_30706	7	chr13_30705	7	0	3	0	4	0	0	0	0.16	0	0.24	0	0	aggcuccccgucuuccgugcagg	ugcugccgggugccaggguccaucuggugccgcauuggcccaggcuccccgucuuccgugcagg
chr13_30705	7	chr13_30705	7	0	3	0	4	0	0	0	0.16	0	0.24	0	0	aggcuccccgucuuccgugcagg	ugcugccgggugccaggguccaucuggugccgcauuggcccaggcuccccgucuuccgugcagg
chr13_31267	7	chr13_31267	7	1	1	0	0	5	0	0.04	0.05	0	0	0.34	0	ucacagggguaggaacacgguag	ucacagggguaggaacacgguaguuauuacauacuugacucccuguaccuuccugagugguu
chr13_32019	7	chr13_32019	7	3	2	0	0	2	0	0.11	0.1	0	0	0.14	0	cugggcgggcugggaggcg	ccgcggcuccaggacacugggcgggcugggaggcg
chr14_32214	7	chr14_32214	7	0	6	0	0	1	0	0	0.31	0	0	0.07	0	aguggcagaugugcagcgagc	aguggcagaugugcagcgagcugcucucgccgggcucgcugccgucgccgccgc
chr14_32294	7	chr14_32294	7	1	0	3	2	1	0	0.04	0	0.15	0.12	0.07	0	cuccccaggcaggcucugc	cuccccaggcaggcucugcaggacuagccagcugauggggccag
chr14_32501	7	chr14_32501	7	0	0	0	7	0	0	0	0	0	0.42	0	0	cucucugugugguccucu	agguaagcugggagggagacaaggaggccaggaugcuggucucucucugugugguccucu
chr14_32578	7	chr14_32578	7	1	1	0	3	2	0	0.04	0.05	0	0.18	0.14	0	uaaagugaugaaggcugaca	uaaagugaugaaggcugacacucucgaccucugacucuggagggcagugugcacagcuguagcauucucaca
chr14_33116	7	chr14_33116	7	0	1	6	0	0	0	0	0.05	0.31	0	0	0	aggggcugcggagaccgagccgc	aggggcugcggagaccgagccgcggagugucugcagcauccaguuuuugcgucuccggcccccaguaagccccggc
chr14_33563	7	chr14_33563	7	3	0	0	0	4	0	0.11	0	0	0	0.28	0	uguguuucuguauaguguauaugu	uguguuucuguauaguguauauguguauacaaaugcaugcauauguacacacaggcauacaca
chr14_33564	7	chr14_33563	7	3	0	0	0	4	0	0.11	0	0	0	0.28	0	uguguuucuguauaguguauaugu	uguguuucuguauaguguauauguguauacaaaugcaugcauauguacacacaggcauacaca
chr15_35320	7	chr15_35320	7	0	7	0	0	0	0	0	0.36	0	0	0	0	accaggccuggggagagu	accaggccuggggagaguggcccggugucacuagguccucaggccccaccc
chr15_35783	7	chr15_35783	7	0	7	0	0	0	0	0	0.36	0	0	0	0	cacgguugugaggcuccg	cacgguugugaggcuccgcguaaauucgcucucccugguacaccaggggcgcgcccuuuucaaggaguccccacguccggcccguc
chr16_36589	7	chr16_36589	7	0	4	3	0	0	0	0	0.21	0.15	0	0	0	uggugcuguccuggaagg	uuccugacagucaccccacuggaaguggugcuguccuggaagg
chr16_37381	7	chr16_37381	7	0	5	2	0	0	0	0	0.26	0.1	0	0	0	uggccccugggguugugcagu	uggccccugggguugugcagugugcagcuugcacaaucguccacagggacccau
chr18_38734	7	chr18_38734	7	0	2	0	0	5	0	0	0.1	0	0	0.34	0	uuccguggcugugacuucc	uuccguggcugugacuuccggaugacgggacacguucacgagggg
chr2_6942	7	chr1_1681	7	0	0	5	0	2	0	0	0	0.26	0	0.14	0	ugcacugcaggccugagg	ucacauccuggcuguguuccagcaguucugugcacugcaggccugagg
chr1_1681	7	chr1_1681	7	0	0	5	0	2	0	0	0	0.26	0	0.14	0	ugcacugcaggccugagg	ucacauccuggcuguguuccagcaguucugugcacugcaggccugagg
chr1_2122	7	chr1_2122	7	0	0	0	0	7	0	0	0	0	0	0.48	0	cuggacuugggggccgagu	ucugagccccgcggagggagggcagcuggacuugggggccgagu
chr1_2678	7	chr1_2678	7	2	0	4	1	0	0	0.07	0	0.21	0.06	0	0	uuuuggaaggcuuagaccauc	ugggucugagaacuuacaaaaguguggauuauagaggacacuuuuggaaggcuuagaccauc
chr1_3527	7	chr1_3527	7	0	0	7	0	0	0	0	0	0.36	0	0	0	gugcugccggaucccugacccacug	gugcugccggaucccugacccacugauccaggccagggaucaagccugcauuu
chr2_4247	7	chr2_4247	7	0	0	4	3	0	0	0	0	0.21	0.18	0	0	ucagacugucagacgggu	ccaucugucagagugucagacugucagacugucagacgggu
chr2_4741	7	chr2_4741	7	0	3	4	0	0	0	0	0.16	0.21	0	0	0	uugggucuuacuccuccagg	cuaagggguagcaguggcucuagggagaugcucaccuugggucuuacuccuccagg
chr2_5588	7	chr2_5588	7	0	1	1	1	4	0	0	0.05	0.05	0.06	0.28	0	cccggcuggaagucucugc	ugagacaguccggaguugacccggcuggaagucucugc
chr2_6067	7	chr2_6067	7	0	3	0	0	4	0	0	0.16	0	0	0.28	0	gguccacagucgggcagggagcc	gguccacagucgggcagggagccaacuuuccagcucaccaagugccggacggaacacgc
chr2_7358	7	chr2_7358	7	0	2	1	2	2	0	0	0.1	0.05	0.12	0.14	0	cauccaucugcuugccuuuccagg	ugggaugggggcagcuggaagacugaaaaccugagcaacauuucauccaucugcuugccuuuccagg
chr2_7466	7	chr2_7466	7	0	0	0	7	0	0	0	0	0	0.42	0	0	gcugacuccucugcuccccuccu	gaaagagcccggguguccagggcucccagcugacuccucugcuccccuccu
chr3_7593	7	chr3_7593	7	3	0	0	2	2	0	0.11	0	0	0.12	0.14	0	ugcggccggcuggcggggcagc	cgccucgccugcugaccgacacggucgucuccucgcagacacacgcgggucgugcggccggcuggcggggcagc
chr3_7823	7	chr3_7823	7	2	1	4	0	0	0	0.07	0.05	0.21	0	0	0	caaaucuugaacuccuuuu	gagggggaagaauuggaaacaaaucuugaacuccuuuu
chr3_8767	7	chr3_8767	7	0	0	7	0	0	0	0	0	0.36	0	0	0	uccgcuguggccgcugccc	gcagacacacagcggggagaagccguuccgcuguggccgcugccc
chr3_9012	7	chr3_9012	7	3	0	1	0	3	0	0.11	0	0.05	0	0.21	0	cugcggugcugugugcuuuggu	caaaguagacacaccugcagcuucgagggcagcugcggugcugugugcuuuggu
chr3_9652	7	chr3_9652	7	1	2	0	2	2	0	0.04	0.1	0	0.12	0.14	0	ucaccaccugcuggcucaugc	augugccaucagguggugcaugguucacuucauaucuucaccaccugcuggcucaugc
chr3_9653	7	chr3_9653	7	0	1	0	0	6	0	0	0.05	0	0	0.41	0	ugcuccgggccgcucgugcag	ugcuccgggccgcucgugcaggcgcgcggcggggcgcggggc
chr4_10296	7	chr4_10296	7	3	3	1	0	0	0	0.11	0.16	0.05	0	0	0	gggcacugaugggucagacugagc	gggcacugaugggucagacugagccgcccagcacccucggaagcccca
chr4_11067	7	chr4_11067	7	0	4	3	0	0	0	0	0.21	0.15	0	0	0	aaggacggaugaagcugcu	cagccucuucccccugcagaaaaggacggaugaagcugcu
chr4_11783	7	chr4_11783	7	1	6	0	0	0	0	0.04	0.31	0	0	0	0	ugagacugggaugacauguuu	ugagacugggaugacauguuuaaguacugaucaaaacacuucuacccagucucuua
chr4_12269	7	chr4_12269	7	0	7	0	0	0	0	0	0.36	0	0	0	0	ccugcgggagugggacgg	ccugcgggagugggacggcgccgccgccgccgcugccgccgccggggggagacgcugcgccgccgcugccgcuggcc
chr4_12311	7	chr4_12311	7	3	0	4	0	0	0	0.11	0	0.21	0	0	0	uaggaaaaggauuugaaaaag	uaggaaaaggauuugaaaaagaacauaugcauuuuguauucuuuuucaaauucuuuucccuac
chr5_13174	7	chr5_13174	7	5	2	0	0	0	0	0.18	0.1	0	0	0	0	ugugaggucgggugcugugaugu	ugugaggucgggugcugugaugucaugcucuguugaugacguguggcuugcuuccucaccagu
chr5_13377	7	chr5_13377	7	0	7	0	0	0	0	0	0.36	0	0	0	0	aacugucuugcuuugcuu	aacugucuugcuuugcuuuugcggggagggaagucua
chr5_14536	7	chr5_14536	7	0	0	0	0	7	0	0	0	0	0	0.48	0	ugggccaguagggacuuagcacuug	agcacagagccuacacgcgugcugcagugguacaaugcugugucacugggugggccaguagggacuuagcacuug
chr6_16115	7	chr6_16115	7	3	0	0	0	4	0	0.11	0	0	0	0.28	0	auagggccgggccuaggagcgu	ccccuggguccggcccuuuuggaggagagguccauagggccgggccuaggagcgu
chr6_16161	7	chr6_16161	7	0	0	7	0	0	0	0	0	0.36	0	0	0	uggcggugacgaugaggc	gucaaaguuuccagccggcuuucggagucucuuugcgucccugcguaucagagauguggaauuggcggugacgaugaggc
chr6_16582	7	chr6_16582	7	0	4	3	0	0	0	0	0.21	0.15	0	0	0	gagggaaccgaggcuggcuggg	gagggaaccgaggcuggcugggucucgaggugggggcccucucgcuucacuuccacccagccucaguccccucgaug
chr6_17343	7	chr6_17343	7	0	0	7	0	0	0	0	0	0.36	0	0	0	ucuggcggagcacccugggcccc	ucuggcggagcacccugggccccucucuccaugcuuugcgggagcgucugguuugggugucugacgagcugggag
chr7_18378	7	chr7_18378	7	2	2	1	2	0	0	0.07	0.1	0.05	0.12	0	0	ucuggacuuggcuugacuuacc	ucuggacuuggcuugacuuaccuuccacagcaagguaagucauucggccaaguccuuguu
chr7_19082	7	chr7_19082	7	1	0	0	0	6	0	0.04	0	0	0	0.41	0	uucuguggccucuucgcuucuc	uucuguggccucuucgcuucucugggaagagaaggcagagggaccgcagacug
chrAEMK02000452.1_41720	7	chr7_19459	7	0	0	0	7	0	0	0	0	0	0.42	0	0	ggggcggggcugggacgc	ggcccagagaugcguccagagagaggggcggggcugggacgc
chr7_19459	7	chr7_19459	7	0	0	0	7	0	0	0	0	0	0.42	0	0	ggggcggggcugggacgc	ggcccagagaugcguccagagagaggggcggggcugggacgc
chrAEMK02000361.1_41764	7	chrAEMK02000361.1_41764	7	0	0	2	0	5	0	0	0	0.1	0	0.34	0	ugaaaguccacggagugucugc	agauaccccguggacaggccacugaaaggaguuuggacggugaaaguccacggagugucugc
chrAEMK02000452.1_41553	7	chrAEMK02000452.1_41553	7	2	5	0	0	0	0	0.07	0.26	0	0	0	0	ugcuuccugccuccguccccagg	gggggacgggggcggguggggcuccccagggacggcggugcuuccugccuccguccccagg
chrAEMK02000465.1_41995	7	chrAEMK02000465.1_41995	7	0	0	0	7	0	0	0	0	0	0.42	0	0	uggaaggcugccucuucugggu	uggaaggcugccucuucuggguguguuuggggaccagcucaaagaggcagccuuccacc
chrY_41089	7	chrAEMK02000465.1_41995	7	0	0	0	7	0	0	0	0	0	0.42	0	0	uggaaggcugccucuucugggu	uggaaggcugccucuucuggguguguuuggggaccagcucaaagaggcagccuuccacc
chrAEMK02000465.1_41996	7	chrAEMK02000465.1_41995	7	0	0	0	7	0	0	0	0	0	0.42	0	0	uggaaggcugccucuucugggu	uggaaggcugccucuucuggguguguuuggggaccagcucaaagaggcagccuuccacc
chrY_41090	7	chrAEMK02000465.1_41995	7	0	0	0	7	0	0	0	0	0	0.42	0	0	uggaaggcugccucuucugggu	uggaaggcugccucuucuggguguguuuggggaccagcucaaagaggcagccuuccacc
chrX_39841	7	chrX_39841	7	2	2	2	0	1	0	0.07	0.1	0.1	0	0.07	0	aaauggcggcgggaaaagcgagcgg	gccgcugccgccgccgcuuucggugaugaggaaaagaaaauggcggcgggaaaagcgagcgg
chrX_40342	7	chrX_40342	7	3	2	0	2	0	0	0.11	0.1	0	0.12	0	0	uguccggccugggagaga	uguccggccugggagagaguaaguagcuggccggggccucgucacc
chr14_32561	7	chr14_32561	7	2	2	1	1	0	1	0.07	0.1	0.05	0.06	0	0.07	uggcucagucagcaggaac	uccugacacugggucagauguccagucuggcucagucagcaggaac
chr17_37814	7	chr17_37814	7	2	0	0	0	4	1	0.07	0	0	0	0.28	0.07	ucgggucagugagcucuucgcu	ucgggucagugagcucuucgcucuuuaccgagauggaagcggggccuggggcgcgcuggcccggac
chr1_3960	7	chr1_3960	7	3	0	0	3	0	1	0.11	0	0	0.18	0	0.07	cugggagcuggaggagcc	ccaugccagugcccaggucaguaggguagcacuuugggcacaggcucugcuccuuagaaaugaccacugggagcuggaggagcc
chr3_9940	7	chr3_9940	7	0	5	0	1	0	1	0	0.26	0	0.06	0	0.07	ucgcugcucaccacccaugaga	acgugggugugcccagcagcagugccgugaauggaagggccucgcugcucaccacccaugaga
chr4_11415	7	chr4_11415	7	1	3	2	0	0	1	0.04	0.16	0.1	0	0	0.07	ucgccuucuguaucuccag	gugagggcagugucugcgaucggagcucagaguuugaggacuucuggaggccuccgucgccuucuguaucuccag
chr4_11416	7	chr4_11415	7	1	3	2	0	0	1	0.04	0.16	0.1	0	0	0.07	ucgccuucuguaucuccag	gugagggcagugucugcgaucggagcucagaguuugaggacuucuggaggccuccgucgccuucuguaucuccag
chr5_13398	7	chr5_13398	7	1	0	5	0	0	1	0.04	0	0.26	0	0	0.07	uuugggacaguaaugagcuagga	uuugggacaguaaugagcuaggaaguggucucucauucuuguuccuuauguguuccuguag
chrAEMK02000682.1_41830	7	chrAEMK02000682.1_41830	7	0	1	3	2	0	1	0	0.05	0.15	0.12	0	0.07	cuuccgccucuggccagagca	cuuccgccucuggccagagcagcacgugggcggcccuuugcccugacccguggcggaaagg
chr11_26427	7	chr11_26427	7	3	0	0	0	2	2	0.11	0	0	0	0.14	0.13	cccgggaccuguggccuucuuu	agaaguccagaggcccuggacgucagccccagcccgggaccuguggccuucuuu
chr6_17008	7	chr6_17008	7	0	0	0	2	3	2	0	0	0	0.12	0.21	0.13	aggcagcagccggacgag	cggaggcugcugccccgggcggagaagcggcgucggcgguuggagcagaggcagcagccggacgag
chrX_40156	7	chrX_40156	7	1	4	0	0	0	2	0.04	0.21	0	0	0	0.13	uucauucggcuguccagaugu	uucauucggcuguccagauguauccaaguaccccgauauuuggcaauaaauacaucugggcaacugauugaacu
chr13_29462	7	chr13_29462	7	0	0	1	0	3	3	0	0	0.05	0	0.21	0.2	ucccccggcggcuccuccagcc	ucccccggcggcuccuccagccucgaggaguggggggcgagggggggg
chr13_30699	7	chr13_30699	7	0	0	4	0	0	3	0	0	0.21	0	0	0.2	ccuggcacacagcaacccugagu	ccaggggcaggucgugugccagccuuggacucaggccuggcacacagcaacccugagu
chr4_10246	7	chr4_10246	7	4	0	0	0	0	3	0.15	0	0	0	0	0.2	uucccgaccguggugcuggagg	uucccgaccguggugcuggaggcuguuuucucccaguacucuccuccagcgcggcugugggcagc
chr6_15710	7	chr6_15710	7	0	0	0	4	0	3	0	0	0	0.24	0	0.2	cugggcccggggagaggagc	cugggcccggggagaggagccuaggacgggccuugucgguaccugggcgcuggg
chr1_2514	7	chr1_2514	7	1	0	0	0	1	5	0.04	0	0	0	0.07	0.34	uuuuccuuuccuuugucucuga	agaggcaaaggaaagggaaaagacuucagggccacaucuuuuuccuuuccuuugucucuga
chr3_8441	7	chr3_8441	7	0	2	0	0	0	5	0	0.1	0	0	0	0.34	uucugucuuagcuugaaucaacu	cagguucaagcugaugcaggagguggaguguacuccuuccaugggcugagucaucacuauccuucugucuuagcuugaaucaacu
chr12_28937	7	chr12_28937	7	0	0	0	0	0	7	0	0	0	0	0	0.47	gcagacguaggcccaguucu	gcagacguaggcccaguucucacccuuugccucugcagcucagcug
chr13_31041	7	chr13_31041	7	0	0	0	0	0	7	0	0	0	0	0	0.47	ugugggggccgcucugguuugc	ugugggggccgcucugguuugcuuucacaaguggcuuaacccagagugacuugugcu
chr14_33204	7	chr14_33204	7	0	0	0	0	0	7	0	0	0	0	0	0.47	aaggagcuggagcaguuuc	aaggagcuggagcaguuucagaugagaaaugcuaaacuucagcaagagaa
chr1_354	7	chr1_354	7	0	0	0	0	0	7	0	0	0	0	0	0.47	gccaaggcgaggcucugacc	gccaaggcgaggcucugaccacagggaaaggaagaguucccuaagcuguggcaugugcagccaggacuuggcuc
chr5_13733	7	chr5_13733	7	0	0	0	0	0	7	0	0	0	0	0	0.47	gagggcugaacuguuccugcaguuu	gagggcugaacuguuccugcaguuucuuggaaggccgagagaaagagagaaaaugaagcugcggcaacgccagcucuucug
chr9_23122	7	chr9_23122	7	0	0	0	0	0	7	0	0	0	0	0	0.47	ccuuuaugacuggcagacggaug	ccuuuaugacuggcagacggaugaaaggaggcuugcaacugguauggggcaacuguugccaucugucugguuggacgucaccagg
chr9_23593	7	chr9_23593	7	0	0	0	0	0	7	0	0	0	0	0	0.47	cugggcagaggacuggcua	gccgggccggcccgggcgucuccugcgugcgggcaacaaauagucgccacgagcagcugggcagaggacuggcua
chr10_25524	6	chr10_25524	6	3	0	0	3	0	0	0.11	0	0	0.18	0	0	agaggugauguaggacugaga	ucaguccuuuucaaggucuugucgugggcagaguagagaaggacaguccagagaggugauguaggacugaga
chr10_25531	6	chr10_25531	6	5	1	0	0	0	0	0.18	0.05	0	0	0	0	aaggaccccucugugcucuccagc	aaggaccccucugugcucuccagcguugcuuugaucagggacuggaaggggccagcugggccugg
chr11_26386	6	chr11_26386	6	0	0	0	0	6	0	0	0	0	0	0.41	0	agggcugcucauuuuucc	agggcugcucauuuuucccaaaguggggaagcucuuggguuaccguca
chr12_27452	6	chr12_27452	6	4	2	0	0	0	0	0.15	0.1	0	0	0	0	uggggccacgucuuacucuagc	uggggccacgucuuacucuagcuuugcuuucggcuugagucuaggcugggccccaaa
chr12_27916	6	chr12_27915	6	0	0	0	0	6	0	0	0	0	0	0.41	0	cagagacggguggggcucc	cagagacggguggggcucccuguccuccggucuccacc
chr12_27915	6	chr12_27915	6	0	0	0	0	6	0	0	0	0	0	0.41	0	cagagacggguggggcucc	cagagacggguggggcucccuguccuccggucuccacc
chr12_28011	6	chr12_28011	6	3	0	3	0	0	0	0.11	0	0.15	0	0	0	guacugcagggucuggaccucugc	ugaggccagagcugcaggggccuuugccagaagguacugcagggucuggaccucugc
chr13_31361	6	chr13_31361	6	0	0	6	0	0	0	0	0	0.31	0	0	0	cucggcccggcggagggg	cucggcccggcggaggggccugggggucucucggcguggcggccgguu
chr13_31606	6	chr13_31606	6	0	0	0	2	4	0	0	0	0	0.12	0.28	0	caggucuggcuuuguucaaaag	cuggagcaaggccuugaccuagaagguugaaaugaagcuccaggucuggcuuuguucaaaag
chr13_31658	6	chr13_31657	6	1	3	2	0	0	0	0.04	0.16	0.1	0	0	0	uauaucugccuguauauaugc	uauaucugccuguauauaugccuauauaccuguauauaucugccuauauauaugccuaug
chr13_31657	6	chr13_31657	6	1	3	2	0	0	0	0.04	0.16	0.1	0	0	0	uauaucugccuguauauaugc	uauaucugccuguauauaugccuauauaccuguauauaucugccuauauauaugccuaug
chr14_33187	6	chr14_33187	6	0	0	0	6	0	0	0	0	0	0.36	0	0	ugcucugagccugucugccu	guggacacucggaggccuguguucuguucccugaaagcggaaacgugcucugagccugucugccu
chr14_33586	6	chr14_33586	6	6	0	0	0	0	0	0.22	0	0	0	0	0	cagccugggccuggggagcu	cuccuggggccaggcgcggcuccccacccccacgccagacaaagagcagccugggccuggggagcu
chr15_35449	6	chr15_35449	6	0	0	0	0	6	0	0	0	0	0	0.41	0	acgcgcgggcaucuccgggg	ccggagaucgccguacgaggccaccacgcgcgggcaucuccgggg
chr15_35530	6	chr15_35529	6	0	0	0	6	0	0	0	0	0	0.36	0	0	cgaggacucgagcggcucg	ggccuuccgguucucggacaucaucgaccagcuggagcagcucagcuacccgcccacgacggccgaggacucgagcggcucg
chr15_35529	6	chr15_35529	6	0	0	0	6	0	0	0	0	0	0.36	0	0	cgaggacucgagcggcucg	ggccuuccgguucucggacaucaucgaccagcuggagcagcucagcuacccgcccacgacggccgaggacucgagcggcucg
chr15_35613	6	chr15_35613	6	6	0	0	0	0	0	0.22	0	0	0	0	0	ccauuccccucagucuccaaacc	ccauuccccucagucuccaaacccacgggcagacagggguacuuaagggaauggagagc
chr16_36794	6	chr16_36794	6	0	0	6	0	0	0	0	0	0.31	0	0	0	gggcacaaaggaaugaauagcu	gggcacaaaggaaugaauagcuuguagggggcaagcuguucauuccuuuguguucau
chr17_37930	6	chr17_37930	6	3	0	2	1	0	0	0.11	0	0.1	0.06	0	0	uggagaaacugagguucuggaaggc	uggagaaacugagguucuggaaggcuaauuuacccaaagagaccucuuugagccucaguuucccugu
chr17_38606	6	chr17_38606	6	0	0	0	0	6	0	0	0	0	0	0.41	0	acuguggugugaggacug	uuccucauuuggggccuggcugaugacagaacugccacuguggugugaggacug
chr17_38677	6	chr17_38677	6	0	0	0	6	0	0	0	0	0	0.36	0	0	ugguugugagacggggccuguccu	ugguugugagacggggccuguccucagguaaaaagcacggcaucacagagcugcaccccgacguggugggcuacgugucacacgccacg
chr18_38898	6	chr18_38898	6	3	0	0	3	0	0	0.11	0	0	0.18	0	0	ucauuggcugcucuguuacuaccc	ucauuggcugcucuguuacuacccggaaaaggaggaggggcggagcuaccaaacagc
chr18_39175	6	chr18_39175	6	0	5	0	0	1	0	0	0.26	0	0	0.07	0	cgcaggagaaagggaacgaucaacg	cgcaggagaaagggaacgaucaacgcucggcuugcugggccgcgcuugcuucucaguuguccggcugc
chr1_247	6	chr1_247	6	1	0	5	0	0	0	0.04	0	0.26	0	0	0	gccugggcugggaagauu	uugagcccuccaggccaacucuuggcagagacccgagagagccugggcugggaagauu
chr1_3083	6	chr1_3083	6	0	0	0	0	6	0	0	0	0	0	0.41	0	agggagagggacgccgccugcaa	agggagagggacgccgccugcaagccugcccccagcgcacccgugcccggcgcuuggagacccucguccccgc
chr1_415	6	chr1_415	6	0	3	3	0	0	0	0	0.16	0.15	0	0	0	uaacugcuggcucaggucac	ggccugguggccuagcgguuaaaggaucuaauguuuaacugcuggcucaggucac
chr1_679	6	chr1_679	6	2	0	4	0	0	0	0.07	0	0.21	0	0	0	ugcugauuccagcucugaccacu	caggcagagcuggaacgcacagcacuuugaggcugcugauuccagcucugaccacu
chr2_4905	6	chr2_4905	6	0	0	6	0	0	0	0	0	0.31	0	0	0	uagugcggcgccugcguucucc	accgccagcggugcagugcugaggccuugaguagugcggcgccugcguucucc
chr2_5219	6	chr2_5219	6	0	0	0	0	6	0	0	0	0	0	0.41	0	caggggugacugaggcug	gccucuauccuccacccuagguuuucaggggugacugaggcug
chr2_5366	6	chr2_5365	6	3	3	0	0	0	0	0.11	0.16	0	0	0	0	ccuccguggccuuccugugca	caggggagugaggccaggagccgguacaucucuuucuccggccccuccguggccuuccugugca
chr2_5365	6	chr2_5365	6	3	3	0	0	0	0	0.11	0.16	0	0	0	0	ccuccguggccuuccugugca	caggggagugaggccaggagccgguacaucucuuucuccggccccuccguggccuuccugugca
chr2_6541	6	chr2_6541	6	0	0	6	0	0	0	0	0	0.31	0	0	0	gugucugcagggaguugucuugcuc	gugucugcagggaguugucuugcuccaaauauagccuccgugggcgggcagggagccagggcugccucccagaccgu
chr2_7276	6	chr2_7276	6	0	0	6	0	0	0	0	0	0.31	0	0	0	uccaagucuugccggagcgcu	cuggauuuccugcgggaccggcacgugcgguucuuccagcgcugccuccaagucuugccggagcgcu
chr2_7310	6	chr2_7310	6	0	3	3	0	0	0	0	0.16	0.15	0	0	0	gcggcacuggcaagaggc	cuucugcugccuuguaugggauucccgagaucagcggcacuggcaagaggc
chr3_10216	6	chr3_10216	6	4	2	0	0	0	0	0.15	0.1	0	0	0	0	augugacagcucccgcccugac	cggggaggggcgcuguuaccgugucuucuugugcaugugacagcucccgcccugac
chr3_7614	6	chr3_7614	6	0	6	0	0	0	0	0	0.31	0	0	0	0	ucagggacggugccuacaacau	ucagggacggugccuacaacaucaaaggcagguucuccuguggguggugcugggugggguccucugggc
chr3_8890	6	chr3_8890	6	0	0	0	0	6	0	0	0	0	0	0.41	0	gacgguggcgggggaaagagcuccu	gacgguggcgggggaaagagcuccuggccacgggcccuggacucuggccuccauggccuugguggu
chr3_9204	6	chr3_9204	6	0	6	0	0	0	0	0	0.31	0	0	0	0	cccgggcggcuguccucg	gggacgcgacgccggccggggagagacaaagaggcgcacccgggcggcuguccucg
chr4_11506	6	chr4_11506	6	3	0	0	3	0	0	0.11	0	0	0.18	0	0	agagggucguccgggucagu	agacccgggcgacgcggcccgcgagcgagagggucguccgggucagu
chr4_11569	6	chr4_11569	6	2	0	0	0	4	0	0.07	0	0	0	0.28	0	ugcugugugccauggcugucuuca	ugcugugugccauggcugucuucauucaucagcaccgaagcagccacggugcagagcagg
chr4_11571	6	chr4_11571	6	0	1	0	5	0	0	0	0.05	0	0.3	0	0	cucucgucccgggcugcgcgg	cucucgucccgggcugcgcgggcccucggcgucaguacucacuugagaggcugauucagcccaggccugcugucuggcuucggcagcu
chr5_13087	6	chr5_13087	6	2	1	0	0	3	0	0.07	0.05	0	0	0.21	0	ugcccccuccccuaccccaga	ggggguccagggaagggggcucaguaccuccugacauugcccccuccccuaccccaga
chr5_13426	6	chr5_13426	6	0	2	0	4	0	0	0	0.1	0	0.24	0	0	uaguagaacagauggccauagcacu	uaguagaacagauggccauagcacuuugggugcugugguuuuccuucugccauc
chr5_13518	6	chr5_13517	6	0	0	3	1	2	0	0	0	0.15	0.06	0.14	0	ccggcuccccggcugucaagc	ggggcggggcggggcagggcgggcagcggggagcccgcgggccacgggcgccggcuccccggcugucaagc
chr5_13517	6	chr5_13517	6	0	0	3	1	2	0	0	0	0.15	0.06	0.14	0	ccggcuccccggcugucaagc	ggggcggggcggggcagggcgggcagcggggagcccgcgggccacgggcgccggcuccccggcugucaagc
chr5_13990	6	chr5_13990	6	0	5	1	0	0	0	0	0.26	0.05	0	0	0	accgggcagcucaguacuu	cugcugugcaguggcccugggaggacagucggaccgggcagcucaguacuu
chr5_14498	6	chr5_14498	6	0	0	0	6	0	0	0	0	0	0.36	0	0	cuugacaaguguucuuucuguuuc	cagagggcuggcuguuugcuugacaaguguucuuucuguuuc
chr6_14769	6	chr6_14769	6	0	0	4	2	0	0	0	0	0.21	0.12	0	0	uccguucggucugucagcgc	gcuaagcagagccgcagcggccacuuucgggagccuucagguguccguucggucugucagcgc
chr6_14851	6	chr6_14851	6	1	2	0	3	0	0	0.04	0.1	0	0.18	0	0	cccucgggaaggacgaag	ucgucugagaagccgaggcgucuucccggaaaccgugcacgggacgcccucgggaaggacgaag
chr6_15052	6	chr6_15052	6	0	0	0	0	6	0	0	0	0	0	0.41	0	ugaaggagcuggagcuagagu	ugaaggagcuggagcuagaguucuggacagacaccauuccccuggugaugucuucguccagagugcuccucgcuccucuuu
chr6_15567	6	chr6_15567	6	2	0	2	2	0	0	0.07	0	0.1	0.12	0	0	cgugugcagggcugcaguggg	cgcugcuguccuguacgcaccccucauccuggaggccgcgugugcagggcugcaguggg
chr6_15960	6	chr6_15960	6	0	0	0	6	0	0	0	0	0	0.36	0	0	gaccuuuuccuuucuguccccugu	gaccuuuuccuuucuguccccugucuaagacuuugaugccuggggauggggggaagcgguuga
chr6_16322	6	chr6_16322	6	3	0	2	0	1	0	0.11	0	0.1	0	0.07	0	agugugugugugugagugugug	agugugugugugugaguguguguguguguuuuaaauacugacauuacaaccauagcucucuacugcuua
chr6_16365	6	chr6_16365	6	0	0	0	3	3	0	0	0	0	0.18	0.21	0	acagcagggcucugacag	uucaugaaacgggccaaauggaguccugggugaaacagucucccccggggccacagcagggcucugacag
chr6_16559	6	chr6_16559	6	0	0	6	0	0	0	0	0	0.31	0	0	0	uggaggauggaaagagcca	uggaggauggaaagagccaucaggcuggcgccuggcggcccgguucaagaguuuccacg
chr6_16738	6	chr6_16737	6	0	0	1	5	0	0	0	0	0.05	0.3	0	0	cagcccgggugugucagcuucc	cagcccgggugugucagcuuccuucugcugccaucugcagagggugcucaugggccggugccagc
chr6_16737	6	chr6_16737	6	0	0	1	5	0	0	0	0	0.05	0.3	0	0	cagcccgggugugucagcuucc	cagcccgggugugucagcuuccuucugcugccaucugcagagggugcucaugggccggugccagc
chr6_17892	6	chr6_17892	6	0	0	6	0	0	0	0	0	0.31	0	0	0	aggacuaggagcagcagcg	cugggcuuguuucuagacuccagacuaccuagaguguggagaggacuaggagcagcagcg
chr7_18747	6	chr7_18747	6	0	0	0	1	5	0	0	0	0	0.06	0.34	0	gaggccgggugagaagaggug	ccgcuugaggaucgcggcguugcagcccgauagcuaugggcagugaggccgggugagaagaggug
chr7_19124	6	chr7_19124	6	4	0	1	1	0	0	0.15	0	0.05	0.06	0	0	aggaccuggggaggggac	aggaccuggggaggggacaguagcccgcaggcggagccccagccccaauccaugg
chr7_19292	6	chr7_19291	6	0	0	0	0	6	0	0	0	0	0	0.41	0	uggggucgggcaggcuguugg	aacaugggcauuccaagcuccccagccuggagcaaguggugagguggggcuagggcuggggucgggcaggcuguugg
chr7_19291	6	chr7_19291	6	0	0	0	0	6	0	0	0	0	0	0.41	0	uggggucgggcaggcuguugg	aacaugggcauuccaagcuccccagccuggagcaaguggugagguggggcuagggcuggggucgggcaggcuguugg
chr7_19701	6	chr7_19701	6	0	3	3	0	0	0	0	0.16	0.15	0	0	0	gugggcaguggagacggg	cucugcugcugcagcguggugggcaguggagacggg
chr7_19867	6	chr7_19867	6	0	0	0	2	4	0	0	0	0	0.12	0.28	0	gaguggagccgagagaac	gaguggagccgagagaacguaaguuccccuugcugcucccaaga
chr7_19993	6	chr7_19993	6	0	0	0	0	6	0	0	0	0	0	0.41	0	uaccugcucugccaucugac	uaccugcucugccaucugaccacuagugggcaggcacagcccu
chr8_22048	6	chr8_22048	6	0	0	6	0	0	0	0	0	0.31	0	0	0	cugggcucugccagucuguccgac	ggggcggggugugcagcgcgcgggggcugggcucugccagucuguccgac
chr9_23033	6	chr9_23033	6	0	0	0	6	0	0	0	0	0	0.36	0	0	cauuuugccugggccugagca	cuuuguguccugggcaagaagggugaccaguugucccauuuugccugggccugagca
chrAEMK02000234.1_42221	6	chrAEMK02000234.1_42221	6	0	6	0	0	0	0	0	0.31	0	0	0	0	cagaucuggggaaccuca	aguggucccuugguuugaugcucagaucuggggaaccuca
chrAEMK02000452.1_41497	6	chrAEMK02000452.1_41497	6	0	0	2	0	4	0	0	0	0.1	0	0.28	0	aucauagaggaaaauccauguu	guggauauuccuucuauguuuacgugauucauagauaaucauagaggaaaauccauguu
chrAEMK02000452.1_41499	6	chrAEMK02000452.1_41499	6	3	0	3	0	0	0	0.11	0	0.15	0	0	0	aucauagaggaaaauccacgu	gguagauucuccuucuaugaguacauuauuuauuauuaaucauagaggaaaauccacgu
chrAEMK02000682.1_41802	6	chrAEMK02000682.1_41802	6	0	0	0	0	6	0	0	0	0	0	0.41	0	caccgccgcguucccgcccccag	caccgccgcguucccgcccccaggacguggagucggagaacgugaacguggugaa
chrX_39758	6	chrX_39758	6	0	0	0	3	3	0	0	0	0	0.18	0.21	0	aguuugaaaaccucugca	aguuugaaaaccucugcaacugccagggguuuucaaacucu
chrX_40339	6	chrX_40339	6	2	1	1	0	2	0	0.07	0.05	0.05	0	0.14	0	ugcccuucuguacuccucccagg	ugggaagcagcgggccagggacaccaaggucaugacccgugacccugcccuucuguacuccucccagg
chrX_40440	6	chrX_40440	6	0	0	6	0	0	0	0	0	0.31	0	0	0	aaggugccagggggucuucug	gcgggccccgauguugcacauuaucugauuaaucaaagaaggugccagggggucuucug
chr17_38700	6	chr17_38700	6	0	0	2	3	0	1	0	0	0.1	0.18	0	0.07	ucuguccgucugucucgucgc	uucggggcgcggggcugacggccgggcgcguccuccuggggaggcggcucagcacgucuguccgucugucucgucgc
chr2_4145	6	chr2_4145	6	0	4	0	1	0	1	0	0.21	0	0.06	0	0.07	cagugaccgguccagcugcagg	agcagcuggaaggucauccuuggcaacgcaucgaaguccagugaccgguccagcugcagg
chr8_22616	6	chr8_22616	6	4	1	0	0	0	1	0.15	0.05	0	0	0	0.07	agugugaucagucuggugccgg	ggcagcagauuggacacacugcugcucuuacaccgaagugugaucagucuggugccgg
chrX_40842	6	chrX_40842	6	5	0	0	0	0	1	0.18	0	0	0	0	0.07	ucuggggaagggaccugggaau	ucccaggccucacccccagagcugcugaaucaggauccucuggggaagggaccugggaau
chr12_27213	6	chr12_27213	6	3	0	0	1	0	2	0.11	0	0	0.06	0	0.13	uggcugucgcccgcuccgagc	gcggagccggcgccagcgggcugcugagguggcugucgcccgcuccgagc
chr13_29873	6	chr13_29873	6	0	4	0	0	0	2	0	0.21	0	0	0	0.13	uuaguauguggcuuguggacuauu	uagucacaagccugucugagaaagauacacaaucuuaguauguggcuuguggacuauu
chr2_4834	6	chr2_4833	6	0	0	0	4	0	2	0	0	0	0.24	0	0.13	cucccccugaaccugauu	ugggguggggcgggggcaggcagagcgaggcucccccugaaccugauu
chr2_4833	6	chr2_4833	6	0	0	0	4	0	2	0	0	0	0.24	0	0.13	cucccccugaaccugauu	ugggguggggcgggggcaggcagagcgaggcucccccugaaccugauu
chr2_6191	6	chr2_6191	6	0	0	3	0	1	2	0	0	0.15	0	0.07	0.13	ucauccucagcgcugccucgugc	ucauccucagcgcugccucgugcuccaguguggacacacaggcagcgaugaggguggcc
chr3_9265	6	chr3_9265	6	1	0	2	0	1	2	0.04	0	0.1	0	0.07	0.13	ucagcccucucggucauccucc	ucagcccucucggucauccuccccagguccggacaauucggcagacuauugucaagcuggagaauaagguccgagaguuggagaag
chr4_12307	6	chr4_12307	6	0	3	0	0	0	3	0	0.16	0	0	0	0.2	aaggaccugccucuguggu	aaggaccugccucuguggucuccuccgccgccgccgcccaggugaguccacca
chr7_20710	6	chr7_20710	6	1	0	2	0	0	3	0.04	0	0.1	0	0	0.2	uggaaguuugguggcuggcucc	agcccuucaccacucuaguuucauccaaguggagguggaaguuugguggcuggcucc
chr10_25040	6	chr10_25039	6	2	0	0	0	0	4	0.07	0	0	0	0	0.27	ugaaggaaagaaugaaagcuga	ugcugaauucugggguucuuuagcagacuagacuguggaugaaggaaagaaugaaagcuga
chr10_25039	6	chr10_25039	6	2	0	0	0	0	4	0.07	0	0	0	0	0.27	ugaaggaaagaaugaaagcuga	ugcugaauucugggguucuuuagcagacuagacuguggaugaaggaaagaaugaaagcuga
chr10_25422	6	chr10_25422	6	2	0	0	0	0	4	0.07	0	0	0	0	0.27	uggacgggcuggucaucccu	ggugcccgcccuggacaaggccgacguggacgggcuggucaucccu
chr6_14904	6	chr6_14904	6	1	1	0	0	0	4	0.04	0.05	0	0	0	0.27	cuccugugaugaccuuugagc	cuccugugaugaccuuugagcuuaggagccuugaagccacaugcguugcuuucaggggaguugguuuucagucggcuguuugg
chr17_38476	6	chr17_38476	6	0	0	1	0	0	5	0	0	0.05	0	0	0.34	uuggcggcagcccuggccuggc	ugggcuagggcuuucgcuggacaaccauggcuaggugggcagagguuggcggcagcccuggccuggc
chr1_3483	6	chr1_3483	6	0	0	0	0	0	6	0	0	0	0	0	0.4	guggacuggugcgaggac	guggacuggugcgaggacaacuacaccaucgugccugccaucg
chr11_26628	5	chr11_26628	5	0	5	0	0	0	0	0	0.26	0	0	0	0	ugaggggucagagcagagaagu	ggcucugcuuuguguccugagcaccaugucgcugaggggucagagcagagaagu
chr11_26979	5	chr11_26979	5	3	0	0	2	0	0	0.11	0	0	0.12	0	0	cuggacagcgacucccgg	cuggacagcgacucccgggugaggcacgcgccccggggcucgguccuuggcuuccugggacgugcauacgcggcgggcg
chr12_28202	5	chr12_28201	5	0	0	0	5	0	0	0	0	0	0.3	0	0	ccugggcucccucugccgc	ccugggcucccucugccgcgcgcgguggcaaccuggcccgaccu
chr12_28201	5	chr12_28201	5	0	0	0	5	0	0	0	0	0	0.3	0	0	ccugggcucccucugccgc	ccugggcucccucugccgcgcgcgguggcaaccuggcccgaccu
chr12_28820	5	chr12_28820	5	0	5	0	0	0	0	0	0.26	0	0	0	0	acugauguuccuucccuaac	ugaggaggggaccuggggacuccggcuuguuccugcucacagagcagggcuguggccugcacugauguuccuucccuaac
chr12_28951	5	chr12_28951	5	0	5	0	0	0	0	0	0.26	0	0	0	0	acuggcgagcugugcacg	acuggcgagcugugcacgagcugcgcaggccgagacggcggcccagagcgcggcggccgggucccaggug
chr13_29701	5	chr13_29701	5	0	0	0	5	0	0	0	0	0	0.3	0	0	ugugaccugggaccucugucucc	ugagcagggguccuggaaccccacacccagcggcugcaucugucaccagcugcugucucuggaucugugaccugggaccucugucucc
chr13_29702	5	chr13_29701	5	0	0	0	5	0	0	0	0	0	0.3	0	0	ugugaccugggaccucugucucc	ugagcagggguccuggaaccccacacccagcggcugcaucugucaccagcugcugucucuggaucugugaccugggaccucugucucc
chr13_30173	5	chr13_30173	5	0	0	5	0	0	0	0	0	0.26	0	0	0	agggcugguggguaaaug	cuucccuuggcuccuccagaccugagggcugguggguaaaug
chr13_30984	5	chr13_30984	5	0	4	0	1	0	0	0	0.21	0	0.06	0	0	cucggaggcuccaucauggcgu	cccuggggccacugugcugggcucuccgcaccgugcuguugcugcuuggcucggaggcuccaucauggcgu
chr13_31416	5	chr13_31416	5	0	1	1	0	3	0	0	0.05	0.05	0	0.21	0	ucgcacauuuccuggacucaca	uggguccagugaucugugggaggaaucgcacaucgcacauuuccuggacucaca
chr14_32129	5	chr14_32129	5	0	0	0	5	0	0	0	0	0	0.3	0	0	cugugcggguuguaguuucgg	gugcgcugcgauggcagauucaaguggggucugugcggguuguaguuucgg
chr14_32162	5	chr14_32162	5	0	0	5	0	0	0	0	0	0.26	0	0	0	uucccugggccugggcugugcu	uucccugggccugggcugugcuuauugucuugcugcuguugugcccaggaaggg
chr14_32401	5	chr14_32401	5	0	0	5	0	0	0	0	0	0.26	0	0	0	agggguccugcccuggcggagc	ucugccaguguccagggcccuagggcacacugcaagggucagggguccugcccuggcggagc
chr14_33133	5	chr14_33133	5	4	0	1	0	0	0	0.15	0	0.05	0	0	0	ccggaggagugcagaccc	gccuggcaucaagggggcggccccggaggagugcagaccc
chr14_33278	5	chr14_33278	5	2	0	2	0	1	0	0.07	0	0.1	0	0.07	0	uguggaaggggcucugagauagc	uguggaaggggcucugagauagcaggaggcagaggcccugcuggggauccugggcccccuccaccca
chr14_33310	5	chr14_33310	5	0	0	0	0	5	0	0	0	0	0	0.34	0	gcacgccacagcucucacucccca	gcacgccacagcucucacuccccaggccugggggucggaagccgugguggccc
chr14_33710	5	chr14_33710	5	0	2	3	0	0	0	0	0.1	0.15	0	0	0	uuuauggaaggaacgguuauga	caaacuuuccuuugcagagaugcugaagaugccauuuauggaaggaacgguuauga
chr14_33921	5	chr14_33921	5	0	0	0	5	0	0	0	0	0	0.3	0	0	augugcucgacggauuuggugu	augugcucgacggauuugguguccccaucaggugcaccuucagccgggcucacca
chr14_34490	5	chr14_34490	5	0	5	0	0	0	0	0	0.26	0	0	0	0	aggcugagggcugugcccc	gcccugcacgccccagugacugcacacacagggacaggcugagggcugugcccc
chr15_34692	5	chr15_34692	5	0	0	0	5	0	0	0	0	0	0.3	0	0	ggcagacuggugacuccc	ggcagacuggugacuccccuggccagguuuucccaauggcuguuacuugucagccagcggcccu
chr15_35072	5	chr15_35072	5	0	5	0	0	0	0	0	0.26	0	0	0	0	agcuagaugaauaauaacguu	agcuagaugaauaauaacguuuucgauccaucagcuuggaucgaaaacguuauuauucaucuagcuau
chr15_36057	5	chr15_35072	5	0	5	0	0	0	0	0	0.26	0	0	0	0	agcuagaugaauaauaacguu	agcuagaugaauaauaacguuuucgauccaucagcuuggaucgaaaacguuauuauucaucuagcuau
chr15_35448	5	chr15_35448	5	3	0	0	2	0	0	0.11	0	0	0.12	0	0	uuggaaccuguccuccuggcc	uuggaaccuguccuccuggccuggugagagcagaucagcaggucagguuccauaau
chr15_35514	5	chr15_35514	5	0	0	0	0	5	0	0	0	0	0	0.34	0	uggggcugggaggacugg	uggggcugggaggacugguggagugacaucccacuucccagcccugggcccagc
chr15_36225	5	chr15_36225	5	0	0	0	0	5	0	0	0	0	0	0.34	0	ccuccucgccuugaacucu	ccuccucgccuugaacucugcagggggcuuggcuuggagggggca
chr15_36344	5	chr15_36344	5	4	0	1	0	0	0	0.15	0	0.05	0	0	0	ucauaugugaucugucccuagg	uggggaucgaggccacaugucccggggcccuucuuggucauaugugaucugucccuagg
chr15_36525	5	chr15_36525	5	0	0	0	0	5	0	0	0	0	0	0.34	0	cgagcucccucugcgugucgcgu	cgagcucccucugcgugucgcgugcugugcugccugugaagguggccgccucugugcacgucccuccaggcagggcucccg
chr16_36778	5	chr16_36778	5	2	2	0	1	0	0	0.07	0.1	0	0.06	0	0	uaggcuggguguggaagcc	uaggcuggguguggaagccgcuagcuagcugcucuuccaaguggcuuagccagag
chr16_37342	5	chr16_37342	5	0	1	0	4	0	0	0	0.05	0	0.24	0	0	uggcccuccauaucuguaguuu	acuacagguauggagggccaacuguaaguuauguuggcccuccauaucuguaguuu
chr17_38149	5	chr17_38149	5	0	0	0	5	0	0	0	0	0	0.3	0	0	uggggucugugccgucucuucug	gccgagggguugagggcccacgucugccacugauggggucugugccgucucuucug
chr17_38159	5	chr17_38159	5	0	0	0	0	5	0	0	0	0	0	0.34	0	acagcaggcugcaguccac	gaccgcagccgcucacuuauugauugccaguuacagcaggcugcaguccac
chr17_38396	5	chr17_38396	5	0	0	5	0	0	0	0	0	0.26	0	0	0	ccaccuccucaucugccagcuca	gcuccuggcagggagaggggagaagccccgcagggaggccaccuccucaucugccagcuca
chr18_38872	5	chr18_38872	5	0	5	0	0	0	0	0	0.26	0	0	0	0	ugccccgucgaagcugucggu	ugccccgucgaagcugucggugcugccagauaaggaaccacgcucagcuuuccugggcagg
chr1_1350	5	chr1_1350	5	0	5	0	0	0	0	0	0.26	0	0	0	0	agcggacgacgccgcccgggc	agcggacgacgccgcccgggcccggacggcugcagcccgcggccacgcgcgggucccgagcgcuccgugucuccgcccc
chr1_1382	5	chr1_1382	5	1	4	0	0	0	0	0.04	0.21	0	0	0	0	cggcagacugggacuuguuguu	cggcagacugggacuuguuguugagcgcagugagacaacaacaaaaucacuagucuuccaga
chr1_1626	5	chr1_1626	5	0	0	0	0	5	0	0	0	0	0	0.34	0	gaugauucgcgaccugagcaagau	gaugauucgcgaccugagcaagauguacccacagaccagacacccggugagugcgggcgucaggggcgcgggcucgccg
chr1_1654	5	chr1_1654	5	0	0	5	0	0	0	0	0	0.26	0	0	0	agggggcccagacccuggcguu	agggggcccagacccuggcguuucgcccgaccugcgcgggacucgccagccccugcugcccccagg
chr1_1879	5	chr1_1879	5	0	0	0	0	5	0	0	0	0	0	0.34	0	uucuccugcuccgggcguucaga	uggugcuccuggcaggagcuggccugugacaccgugcccuucuccugcuccgggcguucaga
chr1_2596	5	chr1_2595	5	0	0	0	0	5	0	0	0	0	0	0.34	0	uaagccucucugugacccag	uaagccucucugugacccagacuuguaguaacucuaaacacucaaugugguugcugcaaccaaaugcaggcagcaugggagggaaaag
chr1_2595	5	chr1_2595	5	0	0	0	0	5	0	0	0	0	0	0.34	0	uaagccucucugugacccag	uaagccucucugugacccagacuuguaguaacucuaaacacucaaugugguugcugcaaccaaaugcaggcagcaugggagggaaaag
chr1_314	5	chr1_314	5	0	5	0	0	0	0	0	0.26	0	0	0	0	agugucgugcuuuacuuuguu	agugucgugcuuuacuuuguugcugggucgugucccagucacagcguggagagcggcaagua
chr1_332	5	chr1_332	5	0	3	2	0	0	0	0	0.16	0.1	0	0	0	ugcuguggcugaggaaauug	ugcuguggcugaggaaauuguggcgcaguagggggguggagcugucucagacccagcaca
chr1_3581	5	chr1_3581	5	0	0	0	5	0	0	0	0	0	0.3	0	0	cuucuguggggcugccuccu	cuucuguggggcugccuccugcagcuccauugggaaaauggugguugggaagacauccccacuugac
chr1_4063	5	chr1_4063	5	0	0	0	0	5	0	0	0	0	0	0.34	0	uccggccugcccuuucuccuugu	uccggccugcccuuucuccuugugagucacugacagggacccaagggcuuggccagcca
chr1_4083	5	chr1_4083	5	0	5	0	0	0	0	0	0.26	0	0	0	0	agagaaaagugcugggacg	agagaaaagugcugggacgcugcggggugacgccucaggaaucucagggguucucagc
chr1_4113	5	chr1_4113	5	0	2	0	3	0	0	0	0.1	0	0.18	0	0	ugugugccauggucucugugc	ugugugccauggucucugugccccaggguugucucggguggggcagagccagggcucgccagu
chr1_628	5	chr1_627	5	0	0	5	0	0	0	0	0	0.26	0	0	0	aguuuccgcggcggacucggg	guccgccgcgguccccgcggccgcccaguuuccgcggcggacucggg
chr1_627	5	chr1_627	5	0	0	5	0	0	0	0	0	0.26	0	0	0	aguuuccgcggcggacucggg	guccgccgcgguccccgcggccgcccaguuuccgcggcggacucggg
chr1_632	5	chr1_632	5	1	0	4	0	0	0	0.04	0	0.21	0	0	0	ucucccuuuuccgucucucuucu	ucucccuuuuccgucucucuucuccuuucaggguccagauagagaagaggaggguaaggaagugg
chr2_5047	5	chr2_5047	5	5	0	0	0	0	0	0.18	0	0	0	0	0	agcagguuuugggccccuggag	ccugggguucaucccaggcuccugucacaaaagagggagcagguuuugggccccuggag
chr2_5262	5	chr2_5262	5	0	0	5	0	0	0	0	0	0.26	0	0	0	ucagggccuggggagggac	ucagggccuggggagggacccuggugaaagguagagccccugcccuggucaggcccugggc
chr2_5760	5	chr2_5760	5	0	5	0	0	0	0	0	0.26	0	0	0	0	gagggcgccggggaccca	gagggcgccggggacccagggccaaaagucacccuagcgc
chr2_5781	5	chr2_5781	5	1	1	0	0	3	0	0.04	0.05	0	0	0.21	0	ugcucugcagugccccaccuug	agguggggugcuccagaggcgcugccuccuuccugggugcucugcagugccccaccuug
chr2_5849	5	chr2_5849	5	1	3	1	0	0	0	0.04	0.16	0.05	0	0	0	ucagagccgcucugugaggcgg	cucucugugcguggccucugcggacccucagagccgcucugugaggcgg
chr2_5850	5	chr2_5850	5	0	5	0	0	0	0	0	0.26	0	0	0	0	uuuugcagaggcagcucuaa	ucagagccgcucugugaggcgguuguugguguucauucccguuuugcagaggcagcucuaa
chr2_5943	5	chr2_5943	5	0	0	5	0	0	0	0	0	0.26	0	0	0	cugggagggugugggggca	cugggagggugugggggcaggggccuggcugugucggaauuacccagccccucacguccugcccaggu
chr8_21574	5	chr2_5943	5	0	0	5	0	0	0	0	0	0.26	0	0	0	cugggagggugugggggca	cugggagggugugggggcaggggccuggcugugucggaauuacccagccccucacguccugcccaggu
chr2_5944	5	chr2_5943	5	0	0	5	0	0	0	0	0	0.26	0	0	0	cugggagggugugggggca	cugggagggugugggggcaggggccuggcugugucggaauuacccagccccucacguccugcccaggu
chr2_5979	5	chr2_5979	5	1	0	3	1	0	0	0.04	0	0.15	0.06	0	0	uucaaccacuuugaccgg	uucaaccacuuugaccgggucagcaggggccuggcccugugggcuggugg
chr2_6596	5	chr2_6596	5	0	0	0	0	5	0	0	0	0	0	0.34	0	cagggcuggggguggggccggguc	ucuggccgcgcuugaagcaagguguggagaggcagggcuggggguggggccggguc
chr2_6924	5	chr2_6924	5	0	0	5	0	0	0	0	0	0.26	0	0	0	cccuguccuucuaccacccagg	gggguggcaugagcacagagccagccucccuguccuucuaccacccagg
chr3_10129	5	chr3_10129	5	0	4	0	0	1	0	0	0.21	0	0	0.07	0	cccucugccugagcucag	cccucugccugagcucagguaccggggcuggggagaggucagggaggggag
chr3_7793	5	chr3_7793	5	0	0	5	0	0	0	0	0	0.26	0	0	0	gagcacggcucggacguguaccuu	ggugccgcgggcugagggugguggccggaacaucccacggucugcccuggagcacggcucggacguguaccuu
chr3_9290	5	chr3_9290	5	0	0	0	0	5	0	0	0	0	0	0.34	0	accgcgcuauaggauucuu	ggauccucgcgcggcgucugacuggaggaaccgcgcuauaggauucuu
chr3_9344	5	chr3_9344	5	0	5	0	0	0	0	0	0.26	0	0	0	0	cugaccccacuucuccccccac	gggggcugggguggggcaaggacagaguccugggagcugcugaccccacuucuccccccac
chr4_10468	5	chr4_10468	5	0	0	0	5	0	0	0	0	0	0.3	0	0	cucuuacagugacugugg	cucuuacagugacugugggcccacuugaggacaggguaggguucucauaugguuggcucaauuaccuggguagagaggg
chr4_11028	5	chr4_11028	5	5	0	0	0	0	0	0.18	0	0	0	0	0	gguggcagaugcacugggacuca	gguggcagaugcacugggacucaucuuauaccagguuucgugucccagugacguucucccacagc
chr4_12250	5	chr4_12250	5	0	0	5	0	0	0	0	0	0.26	0	0	0	ggagacaggugcuaagagcucug	ggagacaggugcuaagagcucugggaacccgaguuauuuauuaaccagagcuguuuuucacuugucugc
chr4_12298	5	chr4_12298	5	0	0	5	0	0	0	0	0	0.26	0	0	0	augcuaagacauuaaccgccuu	gggguugauccucuggcacagaaaggccuuagggccucuuaaugcuaagacauuaaccgccuu
chr4_12405	5	chr4_12405	5	4	1	0	0	0	0	0.15	0.05	0	0	0	0	ugggcugacucugaggggacaga	ugggcugacucugaggggacagagggcagcucccucuugccccaagagcagcccccu
chr4_12406	5	chr4_12405	5	4	1	0	0	0	0	0.15	0.05	0	0	0	0	ugggcugacucugaggggacaga	ugggcugacucugaggggacagagggcagcucccucuugccccaagagcagcccccu
chr5_12614	5	chr5_12614	5	0	0	5	0	0	0	0	0	0.26	0	0	0	gcagugacaccugagccg	gcagugacaccugagccgagagcggauagcaggggcaggccc
chr5_12657	5	chr5_12657	5	0	0	0	5	0	0	0	0	0	0.3	0	0	acuucuuguccagaccguugagcu	cgcagcggguuggguaguugcuccgcgggcggguuuauuauugagcccggcgucccgcccgcgguacuucuuguccagaccguugagcu
chr5_12785	5	chr5_12785	5	0	5	0	0	0	0	0	0.26	0	0	0	0	ccggcaccggcugacgcg	cugugggagcggaucgagggcguccggcaccggcugacgcg
chr5_13094	5	chr5_13094	5	0	0	0	0	5	0	0	0	0	0	0.34	0	cggagagcccugacucauauugacc	cggagagcccugacucauauugaccacagccugagucgucggagcuguccuuuccuggcuggggugaguugggccuugaga
chr5_13485	5	chr5_13485	5	0	0	0	5	0	0	0	0	0	0.3	0	0	cagaggacggacgggccccggc	uggguaccaaagucguccaccgccgccgcgcgcucugcagaggacggacgggccccggc
chr5_13680	5	chr5_13680	5	2	3	0	0	0	0	0.07	0.16	0	0	0	0	ucacgcgucgaccugggcaga	ucacgcgucgaccugggcagaaccugagcguaaggaacccucugcaaggucggaccgcugugacc
chr5_13971	5	chr5_13971	5	5	0	0	0	0	0	0.18	0	0	0	0	0	ccgggaggguugggcuucagc	ccgggaggguugggcuucagcuccccucgccgcgcugagccccccgcgccuguuu
chr5_14220	5	chr5_14220	5	0	0	0	0	5	0	0	0	0	0	0.34	0	caggauccggagccccucgcc	cgcgggacucggggagacugcagugacgcugccgggagacauggcggccgcgcgccucugaauaagcaggauccggagccccucgcc
chr6_14738	5	chr6_14738	5	0	0	0	0	5	0	0	0	0	0	0.34	0	ugugugugugcuguggggcug	ugugugugugcuguggggcugcagugcacuguguccacgugugcaagcacgug
chr6_15033	5	chr6_15033	5	3	2	0	0	0	0	0.11	0.1	0	0	0	0	uggcuucugcucugaugg	aacagaggagcaaguauggaggcuggcuucugcucugaugg
chr6_15342	5	chr6_15342	5	0	0	0	5	0	0	0	0	0	0.3	0	0	cccccccgccucccaccuccug	cccccccgccucccaccuccuguguccccugugcccuagccugguggccuugggaguggagugaggggggaau
chr6_15985	5	chr6_15985	5	0	0	5	0	0	0	0	0	0.26	0	0	0	ccuggucaccccccuccccaac	agagggagggaggcggcccagcgcgugggggcccuggucaccccccuccccaac
chr6_16469	5	chr6_16469	5	5	0	0	0	0	0	0.18	0	0	0	0	0	cuggcaugggaguuagggccuu	aagcccuaacuccuauaccaggcauaggagccuggcaugggaguuagggccuu
chr6_16489	5	chr6_16489	5	0	5	0	0	0	0	0	0.26	0	0	0	0	ccuccuucguuccgggcugc	gacacggacaggcgccucccuccuucguuccgggcugc
chr6_16815	5	chr6_16815	5	0	0	5	0	0	0	0	0	0.26	0	0	0	ccucagcucauaggucacuc	ccucagcucauaggucacucaauuggggugagcugcgagggcu
chr6_17047	5	chr6_17047	5	0	0	5	0	0	0	0	0	0.26	0	0	0	acaucuggagccuagacacuc	acaucuggagccuagacacucaguacagcaaggugcgucuggagcccaggcugggguggggcggggaugggg
chr6_17096	5	chr6_17096	5	0	5	0	0	0	0	0	0.26	0	0	0	0	cccaccgacuggaaccuucu	cggggggcaggggcggcugggagcaguuagggcaaggaucucucccacccaccgacuggaaccuucu
chr6_17134	5	chr6_17134	5	1	0	2	0	2	0	0.04	0	0.1	0	0.14	0	acgugucagugggccugagcccug	ugggccuggaacugagugucccugagugagccagggacacgugucagugggccugagcccug
chr6_17779	5	chr6_17779	5	0	0	0	0	5	0	0	0	0	0	0.34	0	cagcccugugcccccuucccugu	cagcccugugcccccuucccugugagagccuugcuggggagacagggggggugguuccugggguugag
chr6_17942	5	chr6_17942	5	0	1	0	4	0	0	0	0.05	0	0.24	0	0	ugcagccgcuggaucagccucu	aggcuggcgggcggcggcaguagcugcugcagccgcuggaucagccucu
chr6_18180	5	chr6_18180	5	5	0	0	0	0	0	0.18	0	0	0	0	0	gugcugaguccucguccc	gaaggccgcagcgacuccgccaccguggccacaguguagggcgguagugcugaguccucguccc
chr7_18293	5	chr7_18293	5	0	0	5	0	0	0	0	0	0.26	0	0	0	uccaguuggggcucuucu	cagagccuccuggaaggcgcaggcggugcggcgagccgagcggcuucuuguuuuccaguuggggcucuucu
chr7_18294	5	chr7_18293	5	0	0	5	0	0	0	0	0	0.26	0	0	0	uccaguuggggcucuucu	cagagccuccuggaaggcgcaggcggugcggcgagccgagcggcuucuuguuuuccaguuggggcucuucu
chr7_18376	5	chr7_18376	5	5	0	0	0	0	0	0.18	0	0	0	0	0	cagcggauugugucgagcccgg	cagcggauugugucgagcccgggcguccggacgcucgccgcggcuagcggcggc
chr7_18752	5	chr7_18751	5	0	5	0	0	0	0	0	0.26	0	0	0	0	ugggagaagggagguggucagg	auaccuggggcccccuuucugcugcagguuccuucuggaagagggagguugagcgcugggagaagggagguggucagg
chr7_18751	5	chr7_18751	5	0	5	0	0	0	0	0	0.26	0	0	0	0	ugggagaagggagguggucagg	auaccuggggcccccuuucugcugcagguuccuucuggaagagggagguugagcgcugggagaagggagguggucagg
chr7_19226	5	chr7_19226	5	2	1	2	0	0	0	0.07	0.05	0.1	0	0	0	caugggggucucagaguccuggu	caugggggucucagaguccugguacuuugugcauaucaggguccugaacucuccucuuu
chr7_19433	5	chr7_19433	5	3	1	1	0	0	0	0.11	0.05	0.05	0	0	0	ccggaagagaagcugagg	ucagcuuuugucuccugcagcuuugggauccugaugugggcggugcuagccggaagagaagcugagg
chr7_19573	5	chr7_19573	5	0	5	0	0	0	0	0	0.26	0	0	0	0	uuugguuuggcuuuugcu	caugggucuuuccgaagcucagccagcuuugguuuggcuuuugcu
chr7_19828	5	chr7_19828	5	0	0	0	5	0	0	0	0	0	0.3	0	0	gggaccgcaggacucccuga	gggaccgcaggacucccugaccacauggggaaguauuucugauuccucu
chr7_20845	5	chr7_20845	5	1	0	4	0	0	0	0.04	0	0.21	0	0	0	gcgggugcugggagggcuggg	gcgggugcugggagggcugggaacugccggccaagcugaccgcuc
chr8_21119	5	chr8_21119	5	0	5	0	0	0	0	0	0.26	0	0	0	0	guagcaggcacuggggugggc	ccagcccaggccgcaccugggguugggacggguguagcaggcacuggggugggc
chr8_21149	5	chr8_21149	5	0	0	0	5	0	0	0	0	0	0.3	0	0	aggaggcugugccugauga	aucaggacgucugucagcuaagcaggaggcugugccugauga
chr9_22752	5	chr9_22752	5	4	0	0	1	0	0	0.15	0	0	0.06	0	0	ucuccucuagcuuuggca	ucuccucuagcuuuggcaguaagugcccagcuucgggcgucaggcaggguggacugccuagaggagggg
chr9_22891	5	chr9_22891	5	0	0	2	3	0	0	0	0	0.1	0.18	0	0	ucugcacuugaagcugagacu	gcucagcucugaagugcagaggcuguuugcacuuccucugcacuugaagcugagacu
chr9_22892	5	chr9_22891	5	0	0	2	3	0	0	0	0	0.1	0.18	0	0	ucugcacuugaagcugagacu	gcucagcucugaagugcagaggcuguuugcacuuccucugcacuugaagcugagacu
chr9_23695	5	chr9_23695	5	3	1	0	1	0	0	0.11	0.05	0	0.06	0	0	uuccuguaugugcuucaauaaa	uauugaggcacacacaggaaccuauccuucuuccuguaugugcuucaauaaa
chrAEMK02000452.1_41607	5	chrAEMK02000452.1_41607	5	3	0	0	0	2	0	0.11	0	0	0	0.14	0	cugaccccugcccgccccgcag	guggggggggccuggugggguccgggagucacgcugaccccugcccgccccgcag
chrAEMK02000452.1_41722	5	chrAEMK02000452.1_41722	5	0	0	1	0	4	0	0	0	0.05	0	0.28	0	uggagcugcggagggcggg	uucuccagcuccgggaccaggucaggucuaggcccuggagcugcggagggcggg
chrAEMK02000499.1_42742	5	chrAEMK02000499.1_42742	5	0	0	5	0	0	0	0	0	0.26	0	0	0	gggacagugccucagggc	gggacagugccucagggccgcacgcugggaucgccccgcccugcccuggggccuggccg
chrAEMK02000569.1_41903	5	chrAEMK02000569.1_41903	5	0	0	5	0	0	0	0	0	0.26	0	0	0	uuggguucugcagucggc	uuggguucugcagucggcgaggaccagguggcagaaaccagcg
chrX_39974	5	chrX_39974	5	0	4	1	0	0	0	0	0.21	0.05	0	0	0	aacugaggccugaaccaagguc	aacugaggccugaaccaaggucacauaaucagugguagaccugggauucggccucagguuuc
chrX_40142	5	chrX_40142	5	1	1	3	0	0	0	0.04	0.05	0.15	0	0	0	auuuaacugccuaauuaauuauu	auuuaacugccuaauuaauuauuagaauaauuacauuagauaauaauuaggcaguuuaaug
chrX_41007	5	chrX_41007	5	0	5	0	0	0	0	0	0.26	0	0	0	0	cggcggcggcccgcgucugc	cggcggcggcccgcgucugcgucgcgauccgcagccacuggaccgggccguagaccagggccaugccggc
chrX_41008	5	chrX_41007	5	0	5	0	0	0	0	0	0.26	0	0	0	0	cggcggcggcccgcgucugc	cggcggcggcccgcgucugcgucgcgauccgcagccacuggaccgggccguagaccagggccaugccggc
chr15_35259	5	chr15_35259	5	0	0	0	0	4	1	0	0	0	0	0.28	0.07	cuccgguccucguagaag	cugaaguagggcugcagguuggggcagucgcugcugcacucguagcagcggcccuggaagcuccgguccucguagaag
chr17_38167	5	chr17_38167	5	0	4	0	0	0	1	0	0.21	0	0	0	0.07	agccuccugcuuccccgcagg	uggcgggcaaggcgggcgggccgcgugggggacccuccuggcagcagccuccugcuuccccgcagg
chr18_39553	5	chr18_39553	5	1	3	0	0	0	1	0.04	0.16	0	0	0	0.07	ucagcuuggugcucugucggcagg	ucagcuuggugcucugucggcaggucgccgccgaagagcugugcucccu
chr2_6486	5	chr2_6486	5	1	3	0	0	0	1	0.04	0.16	0	0	0	0.07	uagcucccugugccaguccuga	cugucuggcuacagggugcaggcaaggucagcacuguagcucccugugccaguccuga
chr6_18230	5	chr6_18230	5	0	1	0	3	0	1	0	0.05	0	0.18	0	0.07	ccggcggccgagguggga	ccgcucuccgccguugccaugguuacccggcggccgagguggga
chr7_19688	5	chr7_19688	5	0	0	0	4	0	1	0	0	0	0.24	0	0.07	uagcuuggcggcugcucuggca	uagcuuggcggcugcucuggcaacaggcaguucugagccagcccagcucuccaggccucu
chrX_40299	5	chrX_40299	5	1	0	1	0	2	1	0.04	0	0.05	0	0.14	0.07	gcgggcggggccgggggu	cuucuuccaagaccgcaggacacggcgggcggggccgggggu
chr16_37051	5	chr16_37051	5	3	0	0	0	0	2	0.11	0	0	0	0	0.13	cgucuguucguccguguc	cauguggacagcuaauaaaugcgauuguauaggauugcuuauagcgcggcucuguuagcgucuguucguccguguc
chr18_39610	5	chr18_39610	5	0	0	0	0	3	2	0	0	0	0	0.21	0.13	gcgauuccuguccccucag	ggggggaggcgggggcuugagcugggcggagaagaaguuggaggaacgccgcaagcggaggcgauuccuguccccucag
chr7_18660	5	chr7_18660	5	0	0	2	1	0	2	0	0	0.1	0.06	0	0.13	uucucuacucugggcaag	uucucuacucugggcaagguaagcagggggcuggagcuaguagaggc
chr8_21821	5	chr8_21821	5	3	0	0	0	0	2	0.11	0	0	0	0	0.13	ucccuggcuggcaccuggacuu	guccagggcuuagucagcgggggccggaguggcuucccuggcuggcaccuggacuu
chr2_6476	5	chr2_6476	5	0	0	2	0	0	3	0	0	0.1	0	0	0.2	agagucucugacacacacu	agugugugucagagacucuagagcugagucuagagucucugacacacacu
chr7_20486	5	chr7_20486	5	0	2	0	0	0	3	0	0.1	0	0	0	0.2	guaggaaacuggagcgag	agccgccaggaacgccagcugggaaguaggaaacuggagcgag
chr13_31321	5	chr13_31321	5	0	0	0	0	1	4	0	0	0	0	0.07	0.27	aaacugugaugcagaccugaga	aaacugugaugcagaccugagagucucugauggucugccagcagagauag
chr14_34210	5	chr14_34210	5	0	0	0	0	1	4	0	0	0	0	0.07	0.27	gggagucuguggcugaagaaaa	uguuucugcuaacgaucucuuugaugauggcugucaugucugggagucuguggcugaagaaaa
chr17_38094	5	chr17_38094	5	0	0	1	0	0	4	0	0	0.05	0	0	0.27	ugccgugggcugccuuugaccu	ugccgugggcugccuuugaccugugcgucugcuccccaggaggaagacggccuucggauga
chr1_1950	5	chr1_1949	5	1	0	0	0	0	4	0.04	0	0	0	0	0.27	uguggucgguaaagcuggaggcucu	auuaccccagcugggacgcgaacacacgguuccacgggggcagcacaguguggucgguaaagcuggaggcucu
chr1_1949	5	chr1_1949	5	1	0	0	0	0	4	0.04	0	0	0	0	0.27	uguggucgguaaagcuggaggcucu	auuaccccagcugggacgcgaacacacgguuccacgggggcagcacaguguggucgguaaagcuggaggcucu
chr13_30701	5	chr13_30701	5	0	0	0	0	0	5	0	0	0	0	0	0.34	cgggcggccggggacucccgcg	cagguggucccgagcgaugccccccaggugacguggaggcgggcggccggggacucccgcg
chr18_38806	5	chr18_38806	5	0	0	0	0	0	5	0	0	0	0	0	0.34	cccggccugcgcgccucugcagc	cccggccugcgcgccucugcagccccggccccacggaccagcugcagcugccaggcccggcc
chr2_4153	5	chr2_4153	5	0	0	0	0	0	5	0	0	0	0	0	0.34	cgcccccucccugucccgcag	gcggggcuggggggagccgcgggcccgcucaccgcccccucccugucccgcag
chr3_7985	5	chr3_7985	5	0	0	0	0	0	5	0	0	0	0	0	0.34	uggggggagggccugacgaug	cucggacccuaccucucaccuccccagucaguggggguggggggagggccugacgaug
chr3_9341	5	chr3_9341	5	0	0	0	0	0	5	0	0	0	0	0	0.34	cccgaugagacuguucgu	cccgaugagacuguucgugggcuggcugugccugagccuggcguccguguggcuggcgaggaggauguggacg
chr8_21430	5	chr8_21430	5	0	0	0	0	0	5	0	0	0	0	0	0.34	gcgggcucgggggaaggc	gcgggcucgggggaaggccuuucggagacaucccucucagcccagggagcagcuucgccgcccuccccggcaccgcgg
chr12_27457	4	chr12_27457	4	0	0	0	0	4	0	0	0	0	0	0.28	0	gugcccccucuuccuuuccc	gugggaagggggaggcagccuggcaggaaaagaggugcagggcacggugcccccucuuccuuuccc
chr12_27526	4	chr12_27526	4	0	3	0	1	0	0	0	0.16	0	0.06	0	0	ugggcuccacucagucucgggu	ugggcuccacucagucucggguccugagugaggccuuccugaggcaggggcuggcccugagg
chr12_27923	4	chr12_27923	4	0	0	4	0	0	0	0	0	0.21	0	0	0	cccggucucgagacuccc	acgacacugggggaaggcggcggcgcccggucucgagacuccc
chr12_28067	4	chr12_28067	4	0	0	4	0	0	0	0	0	0.21	0	0	0	cuggcugcgcucgcucgc	gcgcggggggagaaggcggcgagagcgcggggagaaaaguucccggccgccuggcugcgcucgcucgc
chr12_28068	4	chr12_28067	4	0	0	4	0	0	0	0	0	0.21	0	0	0	cuggcugcgcucgcucgc	gcgcggggggagaaggcggcgagagcgcggggagaaaaguucccggccgccuggcugcgcucgcucgc
chr12_28645	4	chr12_28645	4	0	4	0	0	0	0	0	0.21	0	0	0	0	caagggguggggugauugu	caagggguggggugauugugaugugggcagggaagcccuucugcuuccu
chr13_29422	4	chr13_29422	4	0	4	0	0	0	0	0	0.21	0	0	0	0	aaggcucaggaucugguaguaga	aaggcucaggaucugguaguagauguagagcagcucuugcgccaguuccugugccgacu
chr13_29447	4	chr13_29447	4	0	0	0	0	4	0	0	0	0	0	0.28	0	ucgggcgccggcggcgggggacg	ggccgcggcgccggggacgcgaaucaucgugcgagcagcggccgcgccucggguucgggcgccggcggcgggggacg
chr13_29744	4	chr13_29744	4	0	0	0	0	4	0	0	0	0	0	0.28	0	uuucagaucagcuucuuccacu	uuucagaucagcuucuuccacuuacauuacauauauggaagaagauggucugauaac
chr13_30226	4	chr13_30226	4	0	0	4	0	0	0	0	0	0.21	0	0	0	uucugaagcugcgagagauggu	uucugaagcugcgagagaugguuaggucgggaucucggccgggccaggugaggucugcggaccugaggc
chr13_31227	4	chr13_31227	4	0	0	0	4	0	0	0	0	0	0.24	0	0	cgcggccugggugagcgcgaggcg	cgcggccugggugagcgcgaggcgcgcgugggugcggugaggggucgggcagcgucuucgaccgggacacguc
chr14_32347	4	chr14_32347	4	0	1	0	2	1	0	0	0.05	0	0.12	0.07	0	uggcucuaggucuuggcugggau	uggcucuaggucuuggcugggauggugcugcuguccuccacgccgacucugugccucc
chr14_32582	4	chr14_32582	4	0	0	0	0	4	0	0	0	0	0	0.28	0	cgcgaccugggccugcugggca	cgcgaccugggccugcugggcaggaucccaggugaaccugcaugggcccugaggccuccgguccagcu
chr14_32596	4	chr14_32595	4	0	0	4	0	0	0	0	0	0.21	0	0	0	gugggcucuggucaggcucugg	aggaacaaacaucagggcuuuuacucuugcucacaggcccugugcucugggucaggugggugaggugugggcucuggucaggcucugg
chr14_32595	4	chr14_32595	4	0	0	4	0	0	0	0	0	0.21	0	0	0	gugggcucuggucaggcucugg	aggaacaaacaucagggcuuuuacucuugcucacaggcccugugcucugggucaggugggugaggugugggcucuggucaggcucugg
chr14_32728	4	chr14_32728	4	0	4	0	0	0	0	0	0.21	0	0	0	0	acggaaccuggaagacccc	acggaaccuggaagaccccagcccuccccgcccgcagccggcagggaaggggccgggcgaccugugc
chr14_32830	4	chr14_32830	4	2	0	0	0	2	0	0.07	0	0	0	0.14	0	uccggucgucgucguagc	uccggucgucgucguagccgcugcugccgcugcugcugcugcugcugcugaggcugcuggcggaggccggagg
chr14_33102	4	chr14_33102	4	0	0	4	0	0	0	0	0	0.21	0	0	0	cacugagcugccuggguggca	cacugagcugccuggguggcaggcccaguccccuuggggcagagcugugggagagggccugguaacccggcggaauuggugcu
chr14_33194	4	chr14_33194	4	0	0	0	4	0	0	0	0	0	0.24	0	0	ugaagggguggggugggca	ugaagggguggggugggcagcaaacgaagauggggagaccuacccauauuuccuuccgugccuccuuucuagaccccugcc
chr14_33583	4	chr14_33583	4	0	0	4	0	0	0	0	0	0.21	0	0	0	gcccggagaugguggagcggagg	gcccggagaugguggagcggaggggcccggggaggccccgcaccaaugggguaagcaggcacccuccccgcacucgcuccgcgcgccc
chr14_34442	4	chr14_34441	4	0	4	0	0	0	0	0	0.21	0	0	0	0	cagacccugagcugccucu	gggcacuucagccuggacucagacccugagcugccucu
chr14_34441	4	chr14_34441	4	0	4	0	0	0	0	0	0.21	0	0	0	0	cagacccugagcugccucu	gggcacuucagccuggacucagacccugagcugccucu
chr14_34564	4	chr14_34564	4	2	0	1	1	0	0	0.07	0	0.05	0.06	0	0	uggcgcuggcucugagcg	cugggggcaaugaccgaacccagccuggcccuggcccugugcccuccaggcaggcugauggcgcuggcucugagcg
chr15_35337	4	chr15_35337	4	0	4	0	0	0	0	0	0.21	0	0	0	0	gcagcacaccgcucuucggacgg	cagcgaggacucggggggcgcgucgggccgcagcacaccgcucuucggacgg
chr15_36169	4	chr15_36169	4	0	4	0	0	0	0	0	0.21	0	0	0	0	gguggucuuaggcaguucugc	gguggucuuaggcaguucugcacuccagagaagugaugggacagcaauucu
chr15_36214	4	chr15_36214	4	0	0	4	0	0	0	0	0	0.21	0	0	0	cccggagcugcgggcggc	cgcccacagccccuccaccgcggcaggguuccgucccccgagccgcccggagcugcgggcggc
chr15_36354	4	chr15_36354	4	0	4	0	0	0	0	0	0.21	0	0	0	0	uuuguucguucggcucgcg	cgagccccucgcacaaaccggaccugagcguuuuguucguucggcucgcg
chr15_36513	4	chr15_36513	4	4	0	0	0	0	0	0.15	0	0	0	0	0	acggacggaccgacgccuga	acggacggaccgacgccugacagcggcugcagcggcgccccgcgcgcccgcgccccgcacccggcccggccccgccg
chr16_37588	4	chr16_37588	4	0	4	0	0	0	0	0	0.21	0	0	0	0	ucgcgugacaggagccugaggag	guccaggcggcugucacugcggugcugacgcuccaucgcgugacaggagccugaggag
chr17_37896	4	chr17_37896	4	2	0	0	0	2	0	0.07	0	0	0	0.14	0	ccuguugcuaccucucugaauu	ccuguugcuaccucucugaauuggcauagagcguagaucucagagagguggcaac
chr17_37989	4	chr17_37989	4	0	0	4	0	0	0	0	0	0.21	0	0	0	cucggagaaguagagagggcagc	ugcggucuccuaggccccgagcucgagcucggagaaguagagagggcagc
chr17_38037	4	chr17_38037	4	0	0	4	0	0	0	0	0	0.21	0	0	0	uguggcucagagcugugugau	uacacuguucagagcugaaucuuacuuuguggcucagagcugugugau
chr17_38038	4	chr17_38037	4	0	0	4	0	0	0	0	0	0.21	0	0	0	uguggcucagagcugugugau	uacacuguucagagcugaaucuuacuuuguggcucagagcugugugau
chr18_39084	4	chr18_39084	4	0	4	0	0	0	0	0	0.21	0	0	0	0	uucacgcagggcagacuggc	uucacgcagggcagacuggccaucggccaagcccuacggaggccagccauucucaccugcggcgcag
chr1_1180	4	chr1_1180	4	0	0	0	4	0	0	0	0	0	0.24	0	0	auggaagggcugagaggc	auggaagggcugagaggccagcgcccucgccgcgcagaggccggggguuggggcuuucugagccugggggcgc
chr1_1883	4	chr1_1883	4	0	3	1	0	0	0	0	0.16	0.05	0	0	0	uccacugacugccuugugcccac	gggccaggaaguaggggccccaggcauuuggguccacugacugccuugugcccac
chr1_1916	4	chr1_1916	4	0	0	0	4	0	0	0	0	0	0.24	0	0	gaggaggcggccggaccgagc	gaggaggcggccggaccgagcgagcgcccgcgcguguggcgugaggggaagccgcugcccgcccccuucg
chr1_1978	4	chr1_1978	4	0	0	0	0	4	0	0	0	0	0	0.28	0	cgggaacguggcucucaucaga	cgggaacguggcucucaucagaagcaucucugagugagaugccacguccuggc
chr1_2216	4	chr1_2216	4	0	0	4	0	0	0	0	0	0.21	0	0	0	ugguggauggcugggcaccc	ucguccaguccaccacuugcuuggggcuccacuuggucacggguuccaugguggauggcugggcaccc
chr1_3281	4	chr1_3281	4	0	0	0	0	4	0	0	0	0	0	0.28	0	ugaucuuggccucugcugu	ugaucuuggccucugcugucuccuccggccugacccuggggccgaguuugggaggcggcuuccgccgaagaggagg
chr1_3696	4	chr1_3696	4	4	0	0	0	0	0	0.15	0	0	0	0	0	accggagguuuggacccu	gcgccaggcccggcuggcggcccggccuuacccagcgacgacggcugcggcuaccggagguuuggacccu
chr1_4040	4	chr1_4040	4	0	0	0	0	4	0	0	0	0	0	0.28	0	accugcaggaaccggagc	accgacgcugcgggaacggaccugcaggaaccggagc
chr1_4105	4	chr1_4105	4	0	0	0	0	4	0	0	0	0	0	0.28	0	agugguggcgcuggcggag	agugguggcgcuggcggagcccggggcucggcggggacagaaggccgcgccaugagccccgccgccgggcgccccccugc
chr1_73	4	chr1_73	4	4	0	0	0	0	0	0.15	0	0	0	0	0	ucccacgggggucgccgccaucc	gugggggcguccucgucccagagcacgacugcaucgcucccacgggggucgccgccaucc
chr1_757	4	chr1_757	4	0	0	4	0	0	0	0	0	0.21	0	0	0	cggcgggcgggcagcugc	gaugucagccggucacauggagccucuuauggcucgggauggcucucggcgggcgggcagcugc
chr2_5106	4	chr2_5106	4	4	0	0	0	0	0	0.15	0	0	0	0	0	uggaauugacagagcugcugcc	uggaauugacagagcugcugccuguaaaaguccucgcugaaggcaccuggcucucccuuuccac
chr2_5706	4	chr2_5706	4	0	4	0	0	0	0	0	0.21	0	0	0	0	ugggucggugcccggggcgcacc	ugggucggugcccggggcgcaccaaggcccugacuuguggccucuacccucaggcgccccgcccggacgccgcccgcc
chr2_5836	4	chr2_5836	4	0	0	4	0	0	0	0	0	0.21	0	0	0	accgggggcugucuggguucg	accgggggcugucuggguucggggaguggggucgagagacucgggaugugcccucacggcacccguuuggcuc
chr2_5839	4	chr2_5839	4	0	0	0	4	0	0	0	0	0	0.24	0	0	uuugcuuggggcaggaggcguc	cgccccugccccacuuagcacccagcaaccucugggguuugcuuggggcaggaggcguc
chr2_5868	4	chr2_5868	4	1	0	0	3	0	0	0.04	0	0	0.18	0	0	cuggcccugccccuccucccaga	gggagaggcaggggcaggggcccuggguggcuuccauggccucaggcuggcccugccccuccucccaga
chr2_5969	4	chr2_5969	4	1	0	3	0	0	0	0.04	0	0.15	0	0	0	cgggagggcgggcaggcu	cgggagggcgggcaggcugacgcgagggggggcggggagccgcgucggcgucgccgggcgcgggcgauucgag
chr2_6244	4	chr2_6244	4	0	0	0	0	4	0	0	0	0	0	0.28	0	uauccuacacagcucugcuucu	uggcagagccuggacugggacuguuuucugaacccuauucuauccuacacagcucugcuucu
chr2_6628	4	chr2_6628	4	3	0	0	1	0	0	0.11	0	0	0.06	0	0	ucaugugccccuguguuuccagc	uggaaacacaggggcaccccucccacacccacucaugugccccuguguuuccagc
chr2_7053	4	chr2_7053	4	0	4	0	0	0	0	0	0.21	0	0	0	0	uccccugcugcucucucccucc	uccccugcugcucucucccuccuuucuuucaucaaggaugagagggugugcaggggucu
chr2_7311	4	chr2_7311	4	0	4	0	0	0	0	0	0.21	0	0	0	0	gcgggcggcggcugcucgg	gcgggcggcggcugcucgggcgcccccgcgagggggcuguggcagccccggcggccg
chr2_7522	4	chr2_7522	4	0	0	0	0	4	0	0	0	0	0	0.28	0	ucuccugcugugacgccccucugc	agaggccgagccgagcagcaggagcggcaggagugggagagcccgcgccucuccugcugugacgccccucugc
chr3_10045	4	chr3_10045	4	0	0	4	0	0	0	0	0	0.21	0	0	0	ugggccggagaaagcgugugugu	ugggccggagaaagcguguguguuucccaggguucuccgcgcuccug
chr3_7575	4	chr3_7575	4	0	0	0	4	0	0	0	0	0	0.24	0	0	cgugugccuguccucccacca	gcgggggaagggcggcgugcgugugcaggcgugugcgugucuguacacgcgugugccuguccucccacca
chr3_7587	4	chr3_7587	4	0	4	0	0	0	0	0	0.21	0	0	0	0	uggacacucaggacgacc	uaccuggugacuuucagcccccugauggacacucaggacgacc
chr3_7888	4	chr3_7888	4	0	4	0	0	0	0	0	0.21	0	0	0	0	cggugcuguguacgggcuc	cggugcuguguacgggcucugcccaugagggcagaccggccuccccacgagagccaggc
chr3_8137	4	chr3_8137	4	0	0	4	0	0	0	0	0	0.21	0	0	0	aggaugagcucgaggccugcaggc	cguguggcucuugagcaggucccuguugcugugggggaaggagcaggaugagcucgaggccugcaggc
chr3_9173	4	chr3_9173	4	0	4	0	0	0	0	0	0.21	0	0	0	0	cuggagagcgggcaggaggg	cuggagagcgggcaggagggcaggaggacgcccccgcggcccucccaccuggccccuccucggccccccuccgca
chr3_9820	4	chr3_9820	4	0	4	0	0	0	0	0	0.21	0	0	0	0	cggcugcucccgggagaggg	uuauuucccaaucccagccacgcagacgccaccggcugcucccgggagaggg
chr4_10385	4	chr4_10385	4	0	0	1	2	1	0	0	0	0.05	0.12	0.07	0	cgugcguccucggcccccgggc	cgcgggggaggggaaagcgcgcgccgcccggccggccgcgugcguccucggcccccgggc
chr4_11597	4	chr4_11597	4	0	4	0	0	0	0	0	0.21	0	0	0	0	uugaggggagcgcucuggaaacu	uugaggggagcgcucuggaaacugccguucggcggcuggaagguuccggggcugguggaggucucgagg
chr4_11920	4	chr4_11920	4	1	2	1	0	0	0	0.04	0.1	0.05	0	0	0	ugugugugggcgccggcg	ugggugucuucgcugcacugaccguagcuauaagagcuggcacggcaagggcucugugugugggcgccggcg
chr4_12172	4	chr4_12171	4	1	0	0	0	3	0	0.04	0	0	0	0.21	0	ucuugucaucucuugucucugcag	ucuugucaucucuugucucugcagcggcucacauuggugugggcaucagugggcaggaagggauccagg
chr4_12171	4	chr4_12171	4	1	0	0	0	3	0	0.04	0	0	0	0.21	0	ucuugucaucucuugucucugcag	ucuugucaucucuugucucugcagcggcucacauuggugugggcaucagugggcaggaagggauccagg
chr4_12478	4	chr4_12477	4	0	0	4	0	0	0	0	0	0.21	0	0	0	gcggaaggcgaccugggc	gcggaaggcgaccugggcgggaggccagagcccgaaggcgccgcggcgcuc
chr4_12477	4	chr4_12477	4	0	0	4	0	0	0	0	0	0.21	0	0	0	gcggaaggcgaccugggc	gcggaaggcgaccugggcgggaggccagagcccgaaggcgccgcggcgcuc
chr5_12627	4	chr5_12627	4	0	0	4	0	0	0	0	0	0.21	0	0	0	cagggaggacgcugggccagag	cuggcugguggccgggucugcgcugugcuggaggugaucgcggcgggcagggaggacgcugggccagag
chr5_12711	4	chr5_12711	4	0	0	0	0	4	0	0	0	0	0	0.28	0	aaccggcucgggcucuccca	gucuggggagaggaggcucgcggugcgcggauucauuccaagggcugcagaaccggcucgggcucuccca
chr5_12759	4	chr5_12759	4	0	0	4	0	0	0	0	0	0.21	0	0	0	uguuacugucuucuccccuga	gggggagaaggccggaaucccucucuccggguggguguguuacugucuucuccccuga
chr5_13645	4	chr5_13645	4	4	0	0	0	0	0	0.15	0	0	0	0	0	uggggcgcgcggggcugugcu	cacaggcccgcgccucccggccgcgacugcuggggcgcgcggggcugugcu
chr5_13882	4	chr5_13882	4	0	4	0	0	0	0	0	0.21	0	0	0	0	uagguugggcucaguggcu	ccucaagccccccaccccguggacacugccccaaugggguaacugcuagguugggcucaguggcu
chr6_15129	4	chr6_15129	4	0	0	1	0	3	0	0	0	0.05	0	0.21	0	acgguggagccgggacgg	acgguggagccgggacggugagguccgggagccgucc
chr6_15206	4	chr6_15206	4	3	0	1	0	0	0	0.11	0	0.05	0	0	0	cgggcugccgcugggggc	cgggcugccgcugggggccccugaggcuucgggggccauggcugggguugcgugcu
chr6_15520	4	chr6_15520	4	4	0	0	0	0	0	0.15	0	0	0	0	0	ggugagggcggugagggcc	ggugagggcggugagggcccggaggaccagcguuuaccugaggcuugucccucagggcggccgccgccaucugacucu
chr6_16566	4	chr6_16566	4	4	0	0	0	0	0	0.15	0	0	0	0	0	caggcugugccccggggagagg	ugaccccuggcacugccuauuugggauuggcaggcaggcugugccccggggagagg
chr6_16592	4	chr6_16592	4	0	1	3	0	0	0	0	0.05	0.15	0	0	0	uguguucgaccuuagggagcugcc	cucgcucccuaggaguggaacgacugggucccuggaugacccuguguucgaccuuagggagcugcc
chr6_17364	4	chr6_17364	4	0	0	0	0	4	0	0	0	0	0	0.28	0	ccccucuccccuccccugcaga	ugcagggacguggggggugggccccggcggcguuggcagaacccugcaggccccucuccccuccccugcaga
chr6_17366	4	chr6_17366	4	0	0	0	0	4	0	0	0	0	0	0.28	0	cucgugcucugugcuccaca	uggagggccgggcauccgggcaggcucuggugccagcugggcucgugcucugugcuccaca
chr6_17774	4	chr6_17774	4	0	2	1	0	1	0	0	0.1	0.05	0	0.07	0	cgggcggacgggaccggacg	uccggcccgcgcugccgcggccugggagcugagccgggcggacgggaccggacg
chr6_17846	4	chr6_17846	4	0	4	0	0	0	0	0	0.21	0	0	0	0	cugcuccugcccauccugag	caggcuggguggggaggagcagggcuaccucacccucugcugcuccugcccauccugag
chr6_17946	4	chr6_17946	4	0	0	0	0	4	0	0	0	0	0	0.28	0	uucuugugacugggguauaca	auaccccagucacaagaauuuugaaucaucugccuaaaaccccacaaaauucuugugacugggguauaca
chr7_19684	4	chr7_19684	4	0	4	0	0	0	0	0	0.21	0	0	0	0	ugggcugggagggaggcc	ugggcugggagggaggcccucucuagaacgaaccuagggaggguccuggucauccccagcccugg
chr7_20243	4	chr7_20243	4	0	4	0	0	0	0	0	0.21	0	0	0	0	ggggcugaggccgcgcuucugagc	ggggcugaggccgcgcuucugagcuagggguaggggguguggucaaagggcagag
chr8_21103	4	chr8_21103	4	0	0	0	0	4	0	0	0	0	0	0.28	0	ucagcggguggggagccaggagg	accugcacccgcaccugccgagcuuaggagucugugcucagcggguggggagccaggagg
chr8_21107	4	chr8_21107	4	0	0	0	1	3	0	0	0	0	0.06	0.21	0	ugccgcugucgcucuccccc	uccagggcaugcagcugcaguccugcagccucugccgcugucgcucuccccc
chr8_21728	4	chr8_21728	4	0	0	0	3	1	0	0	0	0	0.18	0.07	0	gccugugauguagggacugacu	gccugugauguagggacugacugucugcuagguggacagauaacauguuaccauuacugaggcuc
chr8_21938	4	chr8_21938	4	0	0	4	0	0	0	0	0	0.21	0	0	0	uggacgugagggagcccc	ggcgccuucgucauggggccuggacgugagggagcccc
chr8_22636	4	chr8_22636	4	4	0	0	0	0	0	0.15	0	0	0	0	0	uccgccggcggcugcugu	agcagcacaguccucggccagguacugguuccgccggcggcugcugu
chr9_23487	4	chr9_23487	4	4	0	0	0	0	0	0.15	0	0	0	0	0	aggcggaggcaguggggg	ccggcgccguugacuuccgcucccacugugccccgcgagccgaaucauggaucacacugguaaggaggcggaggcaguggggg
chrAEMK02000258.1_42025	4	chrAEMK02000258.1_42025	4	0	0	4	0	0	0	0	0	0.21	0	0	0	cugcagagggcggggagucagc	uuucuccauccuuauuucgaggcccugggggggcugcagagggcggggagucagc
chrAEMK02000328.1_41941	4	chrAEMK02000328.1_41941	4	1	1	0	0	2	0	0.04	0.05	0	0	0.14	0	uccugggucggcgcgcugugacuc	uccgcaggcgcuccucccagcacggaugggccgcacagcgggacccccugggcgccucugaccguccugggucggcgcgcugugacuc
chrAEMK02000452.1_41622	4	chrAEMK02000452.1_41622	4	0	0	0	0	4	0	0	0	0	0	0.28	0	cugggagggcuggaggggu	cugggagggcuggaggggucagggugcacggcagcccccacgcucccacggcagccccagcu
chrX_39779	4	chrX_39779	4	4	0	0	0	0	0	0.15	0	0	0	0	0	uacucuguugggaaugggacu	uccuucucccgcagagaggugguggugagggggcuguguucuacucuguugggaaugggacu
chrX_40433	4	chrX_40433	4	0	0	4	0	0	0	0	0	0.21	0	0	0	aagugccgcuggggagaugcug	aagugccgcuggggagaugcugccuccuggacaacgagggggcaagagacagcaucuccccagcggcacucc
chrX_40446	4	chrX_40446	4	0	0	0	4	0	0	0	0	0	0.24	0	0	aggcagagacugugugcgagcg	uggggcgcuacaccgcgcagccuaaggggaaauuuaacccgaaggcagagacugugugcgagcg
chrX_40810	4	chrX_40810	4	0	0	4	0	0	0	0	0	0.21	0	0	0	cucgucgcucuagggcagccucc	cacugccgagccuagacguguuuccccucucgucgcucuagggcagccucc
chr12_27045	4	chr12_27045	4	3	0	0	0	0	1	0.11	0	0	0	0	0.07	ugaccggcugcuuuugcuccaga	uggggggggggggggcgcuggggcaggcauggggcagcccagccugaccggcugcuuuugcuccaga
chr15_36534	4	chr15_36534	4	0	0	2	1	0	1	0	0	0.1	0.06	0	0.07	ucugggggacguggagcugccgu	gggugccucuggccgugccccaggugcuggucugggggacguggagcugccgu
chr6_15470	4	chr6_15470	4	0	0	2	0	1	1	0	0	0.1	0	0.07	0.07	ugcccaccugccuccuccccca	gugaggccaggcuggugggcgggccaggagaacccagagcccgggacacagcccucaccugcccaccugccuccuccccca
chr12_27771	4	chr12_27771	4	0	0	2	0	0	2	0	0	0.1	0	0	0.13	gcggcuggcggccuggacgccgug	gcggcuggcggccuggacgccgugcuguacuggugccgacgcacggacccggcgcugcuccgccacu
chr5_12851	4	chr5_12851	4	0	0	0	2	0	2	0	0	0	0.12	0	0.13	ugcccggcucuccucccucag	agagggaggggggcucgcacuuagcccgcugcaccgggucuugcccggcucuccucccucag
chr6_14817	4	chr6_14817	4	2	0	0	0	0	2	0.07	0	0	0	0	0.13	ugaggaggcgguagcuccugagu	uggggcugcuggcaccucagugcuccauaaaucugcccugaggaggcgguagcuccugagu
chr1_1479	4	chr1_1479	4	0	0	0	1	0	3	0	0	0	0.06	0	0.2	uggcuguggucacugucuaugg	acauagcagugggacagcuggccaggucagagcuggcuguggucacugucuaugg
chr12_28049	4	chr12_28049	4	0	0	0	0	0	4	0	0	0	0	0	0.27	cgaggugcucucuccccgcagg	ccgggggcagcggugggccuggcacggacgcccgaggugcucucuccccgcagg
chr12_28863	4	chr12_28863	4	0	0	0	0	0	4	0	0	0	0	0	0.27	uggugggugcuaggagcu	uggugggugcuaggagcuccggggcggggcgccggcagggccgacccuccagccucguaggacccgcccca
chr17_38622	4	chr17_38622	4	0	0	0	0	0	4	0	0	0	0	0	0.27	ugcacggcugggcucuugcug	ccaggaucucacucguaaacguauaacggugaguguuggguugcacggcugggcucuugcug
chr2_5131	4	chr2_5131	4	0	0	0	0	0	4	0	0	0	0	0	0.27	cagguaggggugggugcuggg	ccacgcccaccccuggcugcgucuagcuucuuaaaggcgcacgagugccgcacagguaggggugggugcuggg
chr6_16736	4	chr6_16736	4	0	0	0	0	0	4	0	0	0	0	0	0.27	ccugugcugcugagcuccuuc	aggcagcugggcagacacaggcuacgccggcggcccccagccugugcugcugagcuccuuc
chr9_24582	4	chr9_24582	4	0	0	0	0	0	4	0	0	0	0	0	0.27	uaagggaaagaugaaaga	uaacaucucgccuguacugggagacaccauugacuggauuaagucaggcuuuuaagggaaagaugaaaga
chr15_35574	3	chr15_35574	3	0	0	2	0	1	0	0	0	0.1	0	0.07	0	cuucccucccugucuuucucag	gagaaagaagggaagagggaaguuaaagcuuccuucccucccugucuuucucag
chr1_670	3	chr1_670	3	3	0	0	0	0	0	0.11	0	0	0	0	0	ucggcgcaccugacacagcu	ucugucccaggugcgcacugagcuuuccgucagggcucggcgcaccugacacagcu
chr2_4838	3	chr2_4838	3	3	0	0	0	0	0	0.11	0	0	0	0	0	uccccccucggcagcccaggugu	uccccccucggcagcccaggugugcuggaaggggcccccggggagcugagaagggg
chr6_16437	3	chr6_16437	3	0	0	0	0	3	0	0	0	0	0	0.21	0	uccucaggccagccccucucc	cggggggcggggggcgggcaggucagcagcguccucaggccagccccucucc
chr3_9200	3	chr3_9200	3	0	1	0	0	0	2	0	0.05	0	0	0	0.13	cugggcugggcugggccgg	ggcugcaggacggucucacaaacgcgccucuggccgcccacguucccggcuggaggacugggcugggcugggccgg
chr12_28065	2	chr12_28065	2	2	0	0	0	0	0	0.07	0	0	0	0	0	cagugccucggcagugcagc	ugcauugcuguugcauugcacgugugaggcgggugcagugccucggcagugcagc
chr3_7598	2	chr3_7598	2	0	1	0	0	0	1	0	0.05	0	0	0	0.07	uugggggacgagaggcuguggccu	uugggggacgagaggcuguggccucagcucuugcucacagcugguugcggcugcuuggccccccagg
chr5_12781	2	chr5_12781	2	0	0	0	0	0	2	0	0	0	0	0	0.13	agggcucagaccucaggcuugg	aggccugaggcugccgcccaggcucagggcucagaccucaggcuugg

## Sheet: Table S4-2
Table S4-2 Differentially expressed known miRNAs in responst to BP treatment
miRNA	log2FoldChange	pvalue	padj
ssc-miR-196a	2.68649	4.4512e-11	1.14201e-09
ssc-miR-196b-5p	2.07623	5.47705e-06	6.56446e-05
ssc-miR-339-3p	2.07468	0.000698373	0.00471905
ssc-miR-671-5p	2.07204	4.85047e-08	7.51366e-07
ssc-miR-105-1	1.95586	0.0105328	0.0423896
ssc-miR-32	1.86258	4.8556e-05	0.000504613
ssc-miR-452	1.85276	0.00453239	0.0234382
ssc-miR-224	1.84959	5.33085e-12	1.98938e-10
ssc-miR-369	1.80024	0.000264011	0.00218943
ssc-miR-15a	1.73749	0.000397347	0.0028742
ssc-miR-204	1.71209	0.0259383	0.0831849
ssc-miR-136-5p	1.64867	0.0360232	0.103409
ssc-miR-769-3p	1.58478	0.00183716	0.0105476
ssc-miR-30b-5p	1.56018	1.80637e-10	4.0082e-09
ssc-miR-450c-3p	1.48102	0.00303609	0.0163451
ssc-miR-192	1.46866	1.83745e-10	4.02278e-09
ssc-miR-221-3p	1.46304	2.85524e-18	2.05648e-16
ssc-miR-30c-5p	1.44049	6.19898e-13	2.60993e-11
ssc-miR-199b-3p	1.42188	1.05236e-09	1.98617e-08
ssc-miR-199a-3p	1.42185	1.05224e-09	1.98617e-08
ssc-miR-1839-5p	1.40133	5.47174e-07	7.74535e-06
ssc-miR-29b	1.37343	0.000193661	0.0016562
ssc-miR-7-3p	1.36103	0.000642652	0.00437856
ssc-miR-708-5p	1.35874	0.00112638	0.00725299
ssc-miR-10388	1.34393	0.00196777	0.0110654
ssc-miR-130b-3p	1.29634	0.00110822	0.00719245
ssc-miR-4334-3p	1.19199	6.01522e-06	7.15724e-05
ssc-miR-339	1.18876	1.56806e-06	2.11045e-05
ssc-miR-339-5p	1.14955	2.08351e-06	2.67275e-05
ssc-miR-195	1.09006	0.00812458	0.0342066
ssc-miR-424-5p	1.08881	0.000166397	0.00153497
ssc-miR-454	1.08411	0.000391189	0.00286755
ssc-miR-155-5p	1.07585	4.04369e-10	7.99968e-09
ssc-miR-342	1.07385	0.0114012	0.0452194
ssc-miR-421-3p	1.03514	9.72031e-05	0.00092795
ssc-miR-139-3p	-1.02557	0.0494426	0.132223
ssc-miR-423-5p	-1.03981	1.05565e-07	1.59025e-06
ssc-miR-10b	-1.10854	3.44769e-06	4.29013e-05
ssc-miR-122-5p	-1.14888	1.50211e-06	2.05538e-05
ssc-miR-7139-5p	-1.17719	0.00163272	0.00981608
ssc-miR-299	-1.60142	0.000132174	0.0012473
ssc-miR-1249	-1.66753	4.95735e-11	1.23333e-09
ssc-miR-4338	-1.68359	0.0240453	0.0783064
ssc-miR-155-3p	-1.83575	0.00108154	0.00704715

## Sheet: Table S4-3
Table S4-3 Target genes for differentially expressed known miRNAs
miRNA	target_transcriptID	target_geneID	genename
ssc-miR-10388	ENSSSCT00000002697	ENSSSCG00000002428	TTC8
ssc-miR-10388	ENSSSCT00000007162	ENSSSCG00000006540	PBXIP1
ssc-miR-10388	ENSSSCT00000008143	ENSSSCG00000007439	CDH22
ssc-miR-10388	ENSSSCT00000011682	ENSSSCG00000010681	SFXN4
ssc-miR-10388	ENSSSCT00000012326	ENSSSCG00000011258	EXOG
ssc-miR-10388	ENSSSCT00000019344	ENSSSCG00000017772	SDF2
ssc-miR-10388	ENSSSCT00000019521	ENSSSCG00000017937	PHF23
ssc-miR-10388	ENSSSCT00000026396	ENSSSCG00000015839	NRG1
ssc-miR-10388	ENSSSCT00000027039	ENSSSCG00000017937	PHF23
ssc-miR-10388	ENSSSCT00000029994	ENSSSCG00000022247	PROSER2
ssc-miR-10388	ENSSSCT00000041921	ENSSSCG00000028983	TBC1D1
ssc-miR-10388	ENSSSCT00000043867	ENSSSCG00000031125	AMPD2
ssc-miR-10388	ENSSSCT00000044677	ENSSSCG00000031125	AMPD2
ssc-miR-10388	ENSSSCT00000044690	ENSSSCG00000031533	ENSSSCT00000044690
ssc-miR-10388	ENSSSCT00000047494	ENSSSCG00000010513	LCOR
ssc-miR-10388	ENSSSCT00000055233	ENSSSCG00000007456	SULF2
ssc-miR-10388	ENSSSCT00000056156	ENSSSCG00000005198	KDM4C
ssc-miR-10388	ENSSSCT00000060220	ENSSSCG00000031125	AMPD2
ssc-miR-10388	ENSSSCT00000065590	ENSSSCG00000031125	AMPD2
ssc-miR-10388	ENSSSCT00000065745	ENSSSCG00000010025	LIMK2
ssc-miR-10388	ENSSSCT00000065955	ENSSSCG00000037676	KAZN
ssc-miR-10388	ENSSSCT00000068837	ENSSSCG00000044573	ENSSSCT00000068837
ssc-miR-10388	ENSSSCT00000069682	ENSSSCG00000015839	NRG1
ssc-miR-10388	ENSSSCT00000072247	ENSSSCG00000002428	TTC8
ssc-miR-10388	ENSSSCT00000085532	ENSSSCG00000002428	TTC8
ssc-miR-10388	ENSSSCT00000088599	ENSSSCG00000006540	PBXIP1
ssc-miR-10388	ENSSSCT00000088842	ENSSSCG00000005198	KDM4C
ssc-miR-10b	ENSSSCT00000001155	ENSSSCG00000001061	JARID2
ssc-miR-10b	ENSSSCT00000001801	ENSSSCG00000001620	MDFI
ssc-miR-10b	ENSSSCT00000004040	ENSSSCG00000003644	FHL3
ssc-miR-10b	ENSSSCT00000004043	ENSSSCG00000003644	FHL3
ssc-miR-10b	ENSSSCT00000004726	ENSSSCG00000004276	SMAP1
ssc-miR-10b	ENSSSCT00000005984	ENSSSCG00000005440	ENSSSCT00000005984
ssc-miR-10b	ENSSSCT00000010059	ENSSSCG00000009186	METAP1
ssc-miR-10b	ENSSSCT00000011811	ENSSSCG00000010795	NDUFAB1
ssc-miR-10b	ENSSSCT00000012244	ENSSSCG00000011181	NEK11
ssc-miR-10b	ENSSSCT00000012312	ENSSSCG00000011245	ITGA9
ssc-miR-10b	ENSSSCT00000015000	ENSSSCG00000013726	ENSSSCT00000015000
ssc-miR-10b	ENSSSCT00000017368	ENSSSCG00000015951	METAP1D
ssc-miR-10b	ENSSSCT00000017996	ENSSSCG00000021354	CNOT4
ssc-miR-10b	ENSSSCT00000023209	ENSSSCG00000023759	WDR13
ssc-miR-10b	ENSSSCT00000024330	ENSSSCG00000026354	ENSSSCT00000024330
ssc-miR-10b	ENSSSCT00000024337	ENSSSCG00000035224	ENSSSCT00000024337
ssc-miR-10b	ENSSSCT00000026647	ENSSSCG00000023539	MBOAT2
ssc-miR-10b	ENSSSCT00000027084	ENSSSCG00000027131	KLHDC10
ssc-miR-10b	ENSSSCT00000029334	ENSSSCG00000021354	CNOT4
ssc-miR-10b	ENSSSCT00000029444	ENSSSCG00000025408	ULK4
ssc-miR-10b	ENSSSCT00000031451	ENSSSCG00000017601	TOM1L1
ssc-miR-10b	ENSSSCT00000037347	ENSSSCG00000010877	HNRNPU
ssc-miR-10b	ENSSSCT00000037362	ENSSSCG00000039824	ARRDC1
ssc-miR-10b	ENSSSCT00000037770	ENSSSCG00000001620	MDFI
ssc-miR-10b	ENSSSCT00000040198	ENSSSCG00000038184	ACBD7
ssc-miR-10b	ENSSSCT00000040933	ENSSSCG00000004516	MBD1
ssc-miR-10b	ENSSSCT00000043394	ENSSSCG00000021354	CNOT4
ssc-miR-10b	ENSSSCT00000044221	ENSSSCG00000035775	BCS1L
ssc-miR-10b	ENSSSCT00000044515	ENSSSCG00000027131	KLHDC10
ssc-miR-10b	ENSSSCT00000045233	ENSSSCG00000017785	NUFIP2
ssc-miR-10b	ENSSSCT00000046861	ENSSSCG00000006987	SLC7A2
ssc-miR-10b	ENSSSCT00000047423	ENSSSCG00000009994	MTMR3
ssc-miR-10b	ENSSSCT00000050145	ENSSSCG00000004276	SMAP1
ssc-miR-10b	ENSSSCT00000050321	ENSSSCG00000037816	TMEM167B
ssc-miR-10b	ENSSSCT00000052194	ENSSSCG00000038714	ENSSSCT00000052194
ssc-miR-10b	ENSSSCT00000052276	ENSSSCG00000004276	SMAP1
ssc-miR-10b	ENSSSCT00000052502	ENSSSCG00000004516	MBD1
ssc-miR-10b	ENSSSCT00000053053	ENSSSCG00000011524	CHL1
ssc-miR-10b	ENSSSCT00000053171	ENSSSCG00000031608	ENSSSCT00000053171
ssc-miR-10b	ENSSSCT00000053287	ENSSSCG00000037201	MPV17
ssc-miR-10b	ENSSSCT00000053624	ENSSSCG00000039824	ARRDC1
ssc-miR-10b	ENSSSCT00000054182	ENSSSCG00000031892	HSBP1
ssc-miR-10b	ENSSSCT00000054861	ENSSSCG00000039824	ARRDC1
ssc-miR-10b	ENSSSCT00000057623	ENSSSCG00000010107	MED15
ssc-miR-10b	ENSSSCT00000058193	ENSSSCG00000039824	ARRDC1
ssc-miR-10b	ENSSSCT00000058845	ENSSSCG00000026354	ENSSSCT00000058845
ssc-miR-10b	ENSSSCT00000058867	ENSSSCG00000010107	MED15
ssc-miR-10b	ENSSSCT00000060699	ENSSSCG00000023674	SON
ssc-miR-10b	ENSSSCT00000060883	ENSSSCG00000002349	ACOT4
ssc-miR-10b	ENSSSCT00000061338	ENSSSCG00000039824	ARRDC1
ssc-miR-10b	ENSSSCT00000061718	ENSSSCG00000010107	MED15
ssc-miR-10b	ENSSSCT00000063183	ENSSSCG00000011524	CHL1
ssc-miR-10b	ENSSSCT00000063187	ENSSSCG00000001061	JARID2
ssc-miR-10b	ENSSSCT00000063512	ENSSSCG00000001061	JARID2
ssc-miR-10b	ENSSSCT00000063538	ENSSSCG00000035224	ENSSSCT00000063538
ssc-miR-10b	ENSSSCT00000064180	ENSSSCG00000010107	MED15
ssc-miR-10b	ENSSSCT00000064478	ENSSSCG00000013232	ENSSSCT00000064478
ssc-miR-10b	ENSSSCT00000065286	ENSSSCG00000009994	MTMR3
ssc-miR-10b	ENSSSCT00000065390	ENSSSCG00000004469	LCA5
ssc-miR-10b	ENSSSCT00000068104	ENSSSCG00000037201	MPV17
ssc-miR-10b	ENSSSCT00000070709	ENSSSCG00000000457	USP15
ssc-miR-10b	ENSSSCT00000070852	ENSSSCG00000038071	RASL12
ssc-miR-10b	ENSSSCT00000071101	ENSSSCG00000027677	ENSSSCT00000071101
ssc-miR-10b	ENSSSCT00000073029	ENSSSCG00000023539	MBOAT2
ssc-miR-10b	ENSSSCT00000088304	ENSSSCG00000013427	DAZAP1
ssc-miR-10b	ENSSSCT00000090967	ENSSSCG00000008225	PTCD3
ssc-miR-1249	ENSSSCT00000000120	ENSSSCG00000000114	PICK1
ssc-miR-1249	ENSSSCT00000001460	ENSSSCG00000001372	GNL1
ssc-miR-1249	ENSSSCT00000001493	ENSSSCG00000001372	GNL1
ssc-miR-1249	ENSSSCT00000001689	ENSSSCG00000001516	ENSSSCT00000001689
ssc-miR-1249	ENSSSCT00000001758	ENSSSCG00000001578	CMTR1
ssc-miR-1249	ENSSSCT00000002052	ENSSSCG00000001832	ACAN
ssc-miR-1249	ENSSSCT00000002056	ENSSSCG00000001834	MFGE8
ssc-miR-1249	ENSSSCT00000002946	ENSSSCG00000002655	MAP1LC3B
ssc-miR-1249	ENSSSCT00000003092	ENSSSCG00000002792	HSF4
ssc-miR-1249	ENSSSCT00000003352	ENSSSCG00000003018	LIPE
ssc-miR-1249	ENSSSCT00000005057	ENSSSCG00000004578	ANXA2
ssc-miR-1249	ENSSSCT00000006599	ENSSSCG00000006013	AARD
ssc-miR-1249	ENSSSCT00000007211	ENSSSCG00000006582	S100A14
ssc-miR-1249	ENSSSCT00000008025	ENSSSCG00000007334	SRC
ssc-miR-1249	ENSSSCT00000008392	ENSSSCG00000007652	PPP1R35
ssc-miR-1249	ENSSSCT00000008412	ENSSSCG00000007672	POP7
ssc-miR-1249	ENSSSCT00000010407	ENSSSCG00000009491	TGDS
ssc-miR-1249	ENSSSCT00000010838	ENSSSCG00000009888	ERP29
ssc-miR-1249	ENSSSCT00000011882	ENSSSCG00000010860	ENSSSCT00000011882
ssc-miR-1249	ENSSSCT00000012055	ENSSSCG00000011013	WAC
ssc-miR-1249	ENSSSCT00000013441	ENSSSCG00000012292	SYP
ssc-miR-1249	ENSSSCT00000013489	ENSSSCG00000012335	FGD1
ssc-miR-1249	ENSSSCT00000014010	ENSSSCG00000012817	FUNDC2
ssc-miR-1249	ENSSSCT00000015031	ENSSSCG00000013757	C19orf53
ssc-miR-1249	ENSSSCT00000016182	ENSSSCG00000014830	COA4
ssc-miR-1249	ENSSSCT00000017952	ENSSSCG00000016488	SSBP1
ssc-miR-1249	ENSSSCT00000018583	ENSSSCG00000017068	FAXDC2
ssc-miR-1249	ENSSSCT00000018873	ENSSSCG00000017337	ACBD4
ssc-miR-1249	ENSSSCT00000023209	ENSSSCG00000023759	WDR13
ssc-miR-1249	ENSSSCT00000023709	ENSSSCG00000023078	WDR4
ssc-miR-1249	ENSSSCT00000023894	ENSSSCG00000010607	COL17A1
ssc-miR-1249	ENSSSCT00000024298	ENSSSCG00000026466	SLC23A2
ssc-miR-1249	ENSSSCT00000024369	ENSSSCG00000023377	EMP3
ssc-miR-1249	ENSSSCT00000024539	ENSSSCG00000025344	PHC2
ssc-miR-1249	ENSSSCT00000024775	ENSSSCG00000011013	WAC
ssc-miR-1249	ENSSSCT00000024823	ENSSSCG00000011020	JCAD
ssc-miR-1249	ENSSSCT00000025575	ENSSSCG00000022609	WWP2
ssc-miR-1249	ENSSSCT00000026889	ENSSSCG00000023890	ATG2A
ssc-miR-1249	ENSSSCT00000027724	ENSSSCG00000030421	GDI1
ssc-miR-1249	ENSSSCT00000028682	ENSSSCG00000024974	ENSSSCT00000028682
ssc-miR-1249	ENSSSCT00000029290	ENSSSCG00000024373	TRIP12
ssc-miR-1249	ENSSSCT00000031619	ENSSSCG00000023540	ATP6V1FNB
ssc-miR-1249	ENSSSCT00000033697	ENSSSCG00000003481	PADI1
ssc-miR-1249	ENSSSCT00000034155	ENSSSCG00000004578	ANXA2
ssc-miR-1249	ENSSSCT00000035652	ENSSSCG00000025308	IL17D
ssc-miR-1249	ENSSSCT00000036754	ENSSSCG00000034972	CNIH3
ssc-miR-1249	ENSSSCT00000037329	ENSSSCG00000017289	DDX42
ssc-miR-1249	ENSSSCT00000037680	ENSSSCG00000024373	TRIP12
ssc-miR-1249	ENSSSCT00000037953	ENSSSCG00000024373	TRIP12
ssc-miR-1249	ENSSSCT00000038521	ENSSSCG00000021466	BMT2
ssc-miR-1249	ENSSSCT00000039471	ENSSSCG00000035772	CDH5
ssc-miR-1249	ENSSSCT00000039840	ENSSSCG00000027331	COL6A3
ssc-miR-1249	ENSSSCT00000040031	ENSSSCG00000040554	COL9A3
ssc-miR-1249	ENSSSCT00000040040	ENSSSCG00000015234	KIRREL3
ssc-miR-1249	ENSSSCT00000041462	ENSSSCG00000017146	ENSSSCT00000041462
ssc-miR-1249	ENSSSCT00000041605	ENSSSCG00000000736	TEAD4
ssc-miR-1249	ENSSSCT00000043177	ENSSSCG00000036665	ZNF394
ssc-miR-1249	ENSSSCT00000043647	ENSSSCG00000035653	PGAP2
ssc-miR-1249	ENSSSCT00000044016	ENSSSCG00000002666	KIAA0513
ssc-miR-1249	ENSSSCT00000045956	ENSSSCG00000027812	IQSEC1
ssc-miR-1249	ENSSSCT00000046645	ENSSSCG00000033541	NAT8L
ssc-miR-1249	ENSSSCT00000047234	ENSSSCG00000024974	ENSSSCT00000047234
ssc-miR-1249	ENSSSCT00000047445	ENSSSCG00000004578	ANXA2
ssc-miR-1249	ENSSSCT00000048150	ENSSSCG00000027812	IQSEC1
ssc-miR-1249	ENSSSCT00000048410	ENSSSCG00000003018	LIPE
ssc-miR-1249	ENSSSCT00000049092	ENSSSCG00000022609	WWP2
ssc-miR-1249	ENSSSCT00000050356	ENSSSCG00000027812	IQSEC1
ssc-miR-1249	ENSSSCT00000051056	ENSSSCG00000010860	ENSSSCT00000051056
ssc-miR-1249	ENSSSCT00000051101	ENSSSCG00000000114	PICK1
ssc-miR-1249	ENSSSCT00000051557	ENSSSCG00000024841	SLC35A2
ssc-miR-1249	ENSSSCT00000051953	ENSSSCG00000032473	NYNRIN
ssc-miR-1249	ENSSSCT00000052236	ENSSSCG00000039580	FOXJ2
ssc-miR-1249	ENSSSCT00000052240	ENSSSCG00000038474	AURKAIP1
ssc-miR-1249	ENSSSCT00000052390	ENSSSCG00000035653	PGAP2
ssc-miR-1249	ENSSSCT00000053251	ENSSSCG00000035653	PGAP2
ssc-miR-1249	ENSSSCT00000054595	ENSSSCG00000002355	ENTPD5
ssc-miR-1249	ENSSSCT00000056129	ENSSSCG00000003377	ACOT7
ssc-miR-1249	ENSSSCT00000056237	ENSSSCG00000017874	ATP2A3
ssc-miR-1249	ENSSSCT00000056471	ENSSSCG00000011020	JCAD
ssc-miR-1249	ENSSSCT00000057028	ENSSSCG00000040706	DBN1
ssc-miR-1249	ENSSSCT00000057176	ENSSSCG00000040524	ISYNA1
ssc-miR-1249	ENSSSCT00000057728	ENSSSCG00000027331	COL6A3
ssc-miR-1249	ENSSSCT00000057958	ENSSSCG00000027812	IQSEC1
ssc-miR-1249	ENSSSCT00000058165	ENSSSCG00000040125	NOL3
ssc-miR-1249	ENSSSCT00000059051	ENSSSCG00000024841	SLC35A2
ssc-miR-1249	ENSSSCT00000059746	ENSSSCG00000024841	SLC35A2
ssc-miR-1249	ENSSSCT00000060169	ENSSSCG00000024373	TRIP12
ssc-miR-1249	ENSSSCT00000062662	ENSSSCG00000040632	ENSSSCT00000062662
ssc-miR-1249	ENSSSCT00000064359	ENSSSCG00000001832	ACAN
ssc-miR-1249	ENSSSCT00000064674	ENSSSCG00000006231	CHD7
ssc-miR-1249	ENSSSCT00000064883	ENSSSCG00000000114	PICK1
ssc-miR-1249	ENSSSCT00000065740	ENSSSCG00000010860	ENSSSCT00000065740
ssc-miR-1249	ENSSSCT00000065857	ENSSSCG00000010860	ENSSSCT00000065857
ssc-miR-1249	ENSSSCT00000067227	ENSSSCG00000008061	ELOB
ssc-miR-1249	ENSSSCT00000067761	ENSSSCG00000036665	ZNF394
ssc-miR-1249	ENSSSCT00000070367	ENSSSCG00000013507	MPND
ssc-miR-1249	ENSSSCT00000071105	ENSSSCG00000001578	CMTR1
ssc-miR-1249	ENSSSCT00000072012	ENSSSCG00000039249	ENSSSCT00000072012
ssc-miR-1249	ENSSSCT00000072123	ENSSSCG00000017957	EIF4A1
ssc-miR-1249	ENSSSCT00000072186	ENSSSCG00000001372	GNL1
ssc-miR-1249	ENSSSCT00000072538	ENSSSCG00000027723	ENSSSCT00000072538
ssc-miR-1249	ENSSSCT00000074067	ENSSSCG00000027229	B3GNTL1
ssc-miR-1249	ENSSSCT00000074613	ENSSSCG00000032622	SLC39A14
ssc-miR-1249	ENSSSCT00000074886	ENSSSCG00000027723	ENSSSCT00000074886
ssc-miR-1249	ENSSSCT00000075139	ENSSSCG00000022301	EIF4EBP1
ssc-miR-1249	ENSSSCT00000075637	ENSSSCG00000048448	ENSSSCT00000075637
ssc-miR-1249	ENSSSCT00000077271	ENSSSCG00000045625	ENSSSCT00000077271
ssc-miR-1249	ENSSSCT00000078280	ENSSSCG00000003377	ACOT7
ssc-miR-1249	ENSSSCT00000080324	ENSSSCG00000025344	PHC2
ssc-miR-1249	ENSSSCT00000080735	ENSSSCG00000035653	PGAP2
ssc-miR-1249	ENSSSCT00000081357	ENSSSCG00000007926	SEC14L5
ssc-miR-1249	ENSSSCT00000082503	ENSSSCG00000009545	COL4A2
ssc-miR-1249	ENSSSCT00000085056	ENSSSCG00000039506	ENSSSCT00000085056
ssc-miR-1249	ENSSSCT00000086560	ENSSSCG00000003738	MAPRE2
ssc-miR-1249	ENSSSCT00000087012	ENSSSCG00000032843	AHRR
ssc-miR-1249	ENSSSCT00000087183	ENSSSCG00000011013	WAC
ssc-miR-1249	ENSSSCT00000087442	ENSSSCG00000004578	ANXA2
ssc-miR-1249	ENSSSCT00000087682	ENSSSCG00000051187	ENSSSCT00000087682
ssc-miR-1249	ENSSSCT00000088628	ENSSSCG00000002269	MTHFD1
ssc-miR-1249	ENSSSCT00000088920	ENSSSCG00000039745	HMOX1
ssc-miR-1249	ENSSSCT00000089159	ENSSSCG00000002269	MTHFD1
ssc-miR-1249	ENSSSCT00000089915	ENSSSCG00000003377	ACOT7
ssc-miR-1249	ENSSSCT00000091064	ENSSSCG00000044051	ENSSSCT00000091064
ssc-miR-139-3p	ENSSSCT00000000797	ENSSSCG00000000734	TSPAN11
ssc-miR-139-3p	ENSSSCT00000003492	ENSSSCG00000003147	CA11
ssc-miR-139-3p	ENSSSCT00000006217	ENSSSCG00000005654	SPTAN1
ssc-miR-139-3p	ENSSSCT00000007119	ENSSSCG00000006500	UBQLN4
ssc-miR-139-3p	ENSSSCT00000008791	ENSSSCG00000008022	TELO2
ssc-miR-139-3p	ENSSSCT00000011097	ENSSSCG00000010136	TRMT2A
ssc-miR-139-3p	ENSSSCT00000011222	ENSSSCG00000010252	HKDC1
ssc-miR-139-3p	ENSSSCT00000013034	ENSSSCG00000011911	DRD3
ssc-miR-139-3p	ENSSSCT00000014161	ENSSSCG00000012956	PACS1
ssc-miR-139-3p	ENSSSCT00000019030	ENSSSCG00000017479	WIPF2
ssc-miR-139-3p	ENSSSCT00000019456	ENSSSCG00000017879	SPNS2
ssc-miR-139-3p	ENSSSCT00000022901	ENSSSCG00000030696	SLC19A1
ssc-miR-139-3p	ENSSSCT00000028908	ENSSSCG00000039654	NIF3L1
ssc-miR-139-3p	ENSSSCT00000029839	ENSSSCG00000029602	WDR37
ssc-miR-139-3p	ENSSSCT00000030661	ENSSSCG00000022778	SGF29
ssc-miR-139-3p	ENSSSCT00000038308	ENSSSCG00000039654	NIF3L1
ssc-miR-139-3p	ENSSSCT00000039276	ENSSSCG00000022192	NCAPD3
ssc-miR-139-3p	ENSSSCT00000039817	ENSSSCG00000023907	AFAP1
ssc-miR-139-3p	ENSSSCT00000043982	ENSSSCG00000012956	PACS1
ssc-miR-139-3p	ENSSSCT00000044582	ENSSSCG00000034465	LRP10
ssc-miR-139-3p	ENSSSCT00000044780	ENSSSCG00000023920	P3H1
ssc-miR-139-3p	ENSSSCT00000046382	ENSSSCG00000031769	CTTN
ssc-miR-139-3p	ENSSSCT00000046403	ENSSSCG00000032668	PRR12
ssc-miR-139-3p	ENSSSCT00000047303	ENSSSCG00000031925	SHANK3
ssc-miR-139-3p	ENSSSCT00000048576	ENSSSCG00000005654	SPTAN1
ssc-miR-139-3p	ENSSSCT00000049165	ENSSSCG00000035081	CCDC106
ssc-miR-139-3p	ENSSSCT00000050712	ENSSSCG00000039094	PLEC
ssc-miR-139-3p	ENSSSCT00000051199	ENSSSCG00000027288	DAGLB
ssc-miR-139-3p	ENSSSCT00000051575	ENSSSCG00000035081	CCDC106
ssc-miR-139-3p	ENSSSCT00000051979	ENSSSCG00000039094	PLEC
ssc-miR-139-3p	ENSSSCT00000052766	ENSSSCG00000021560	ENSSSCT00000052766
ssc-miR-139-3p	ENSSSCT00000053255	ENSSSCG00000031769	CTTN
ssc-miR-139-3p	ENSSSCT00000053968	ENSSSCG00000033194	GEMIN7
ssc-miR-139-3p	ENSSSCT00000054289	ENSSSCG00000031769	CTTN
ssc-miR-139-3p	ENSSSCT00000054462	ENSSSCG00000007980	FAM234A
ssc-miR-139-3p	ENSSSCT00000054546	ENSSSCG00000039094	PLEC
ssc-miR-139-3p	ENSSSCT00000055605	ENSSSCG00000005654	SPTAN1
ssc-miR-139-3p	ENSSSCT00000055681	ENSSSCG00000023920	P3H1
ssc-miR-139-3p	ENSSSCT00000055970	ENSSSCG00000039094	PLEC
ssc-miR-139-3p	ENSSSCT00000058623	ENSSSCG00000016772	VPS41
ssc-miR-139-3p	ENSSSCT00000059241	ENSSSCG00000017290	STRADA
ssc-miR-139-3p	ENSSSCT00000061139	ENSSSCG00000027722	BMP2K
ssc-miR-139-3p	ENSSSCT00000061176	ENSSSCG00000040869	INPP5E
ssc-miR-139-3p	ENSSSCT00000061444	ENSSSCG00000034414	PSME3IP1
ssc-miR-139-3p	ENSSSCT00000061968	ENSSSCG00000039094	PLEC
ssc-miR-139-3p	ENSSSCT00000062605	ENSSSCG00000039034	DNALI1
ssc-miR-139-3p	ENSSSCT00000065927	ENSSSCG00000033194	GEMIN7
ssc-miR-139-3p	ENSSSCT00000067285	ENSSSCG00000028052	OBSL1
ssc-miR-139-3p	ENSSSCT00000068854	ENSSSCG00000016368	FARP2
ssc-miR-139-3p	ENSSSCT00000070397	ENSSSCG00000015949	SLC25A12
ssc-miR-139-3p	ENSSSCT00000071885	ENSSSCG00000035081	CCDC106
ssc-miR-139-3p	ENSSSCT00000078210	ENSSSCG00000031462	ENSSSCT00000078210
ssc-miR-139-3p	ENSSSCT00000080633	ENSSSCG00000003195	PNKP
ssc-miR-139-3p	ENSSSCT00000082770	ENSSSCG00000022192	NCAPD3
ssc-miR-139-3p	ENSSSCT00000082839	ENSSSCG00000031769	CTTN
ssc-miR-139-3p	ENSSSCT00000083375	ENSSSCG00000012956	PACS1
ssc-miR-139-3p	ENSSSCT00000087272	ENSSSCG00000025164	TSC22D4
ssc-miR-139-3p	ENSSSCT00000089482	ENSSSCG00000040869	INPP5E
ssc-miR-15a	ENSSSCT00000004273	ENSSSCG00000003861	ORC1
ssc-miR-15a	ENSSSCT00000005473	ENSSSCG00000004961	ITGA11
ssc-miR-15a	ENSSSCT00000007261	ENSSSCG00000006627	ZNF687
ssc-miR-15a	ENSSSCT00000007931	ENSSSCG00000007249	NOL4L
ssc-miR-15a	ENSSSCT00000009065	ENSSSCG00000033366	ENSSSCT00000009065
ssc-miR-15a	ENSSSCT00000012695	ENSSSCG00000011598	FGD5
ssc-miR-15a	ENSSSCT00000013461	ENSSSCG00000012310	BMP15
ssc-miR-15a	ENSSSCT00000013874	ENSSSCG00000012691	ZNF449
ssc-miR-15a	ENSSSCT00000015758	ENSSSCG00000014418	STK32A
ssc-miR-15a	ENSSSCT00000016142	ENSSSCG00000014791	RRM1
ssc-miR-15a	ENSSSCT00000018340	ENSSSCG00000016843	CPLANE1
ssc-miR-15a	ENSSSCT00000019442	ENSSSCG00000017866	TAX1BP3
ssc-miR-15a	ENSSSCT00000019622	ENSSSCG00000018027	ENSSSCT00000019622
ssc-miR-15a	ENSSSCT00000026520	ENSSSCG00000016237	DOCK10
ssc-miR-15a	ENSSSCT00000031603	ENSSSCG00000030432	RAB42
ssc-miR-15a	ENSSSCT00000035042	ENSSSCG00000013766	IL27RA
ssc-miR-15a	ENSSSCT00000038797	ENSSSCG00000004205	ARHGAP18
ssc-miR-15a	ENSSSCT00000040808	ENSSSCG00000012691	ZNF449
ssc-miR-15a	ENSSSCT00000041213	ENSSSCG00000033708	REPIN1
ssc-miR-15a	ENSSSCT00000044820	ENSSSCG00000016237	DOCK10
ssc-miR-15a	ENSSSCT00000045206	ENSSSCG00000038738	DMWD
ssc-miR-15a	ENSSSCT00000045636	ENSSSCG00000039188	AK8
ssc-miR-15a	ENSSSCT00000047609	ENSSSCG00000004205	ARHGAP18
ssc-miR-15a	ENSSSCT00000048993	ENSSSCG00000035344	UBE2S
ssc-miR-15a	ENSSSCT00000049927	ENSSSCG00000003401	KIF1B
ssc-miR-15a	ENSSSCT00000052945	ENSSSCG00000016157	MYL1
ssc-miR-15a	ENSSSCT00000053674	ENSSSCG00000038969	ENSSSCT00000053674
ssc-miR-15a	ENSSSCT00000054100	ENSSSCG00000033363	ENSSSCT00000054100
ssc-miR-15a	ENSSSCT00000058075	ENSSSCG00000015391	CROT
ssc-miR-15a	ENSSSCT00000059471	ENSSSCG00000006627	ZNF687
ssc-miR-15a	ENSSSCT00000062416	ENSSSCG00000012663	ENOX2
ssc-miR-15a	ENSSSCT00000062420	ENSSSCG00000013620	PLPPR2
ssc-miR-15a	ENSSSCT00000063091	ENSSSCG00000016237	DOCK10
ssc-miR-15a	ENSSSCT00000064509	ENSSSCG00000017052	ADAM19
ssc-miR-15a	ENSSSCT00000064752	ENSSSCG00000038969	ENSSSCT00000064752
ssc-miR-15a	ENSSSCT00000072085	ENSSSCG00000016509	ENSSSCT00000072085
ssc-miR-15a	ENSSSCT00000072214	ENSSSCG00000008540	PPP1CB
ssc-miR-15a	ENSSSCT00000080240	ENSSSCG00000000843	TXNRD1
ssc-miR-15a	ENSSSCT00000082057	ENSSSCG00000017052	ADAM19
ssc-miR-15a	ENSSSCT00000087997	ENSSSCG00000028113	CAPZA2
ssc-miR-196b-5p	ENSSSCT00000007556	ENSSSCG00000006900	DIPK1A
ssc-miR-196b-5p	ENSSSCT00000016541	ENSSSCG00000015175	VWA5A
ssc-miR-196b-5p	ENSSSCT00000026868	ENSSSCG00000015175	VWA5A
ssc-miR-196b-5p	ENSSSCT00000045671	ENSSSCG00000006079	RIDA
ssc-miR-196b-5p	ENSSSCT00000056155	ENSSSCG00000022634	ENSSSCT00000056155
ssc-miR-196b-5p	ENSSSCT00000090858	ENSSSCG00000006900	DIPK1A
ssc-miR-204	ENSSSCT00000008284	ENSSSCG00000007552	ENSSSCT00000008284
ssc-miR-204	ENSSSCT00000009013	ENSSSCG00000008230	ATOH8
ssc-miR-204	ENSSSCT00000009051	ENSSSCG00000008265	DOK1
ssc-miR-204	ENSSSCT00000010221	ENSSSCG00000009327	ENSSSCT00000010221
ssc-miR-204	ENSSSCT00000014092	ENSSSCG00000012890	TCIRG1
ssc-miR-204	ENSSSCT00000014172	ENSSSCG00000012965	DRAP1
ssc-miR-204	ENSSSCT00000018847	ENSSSCG00000017311	MAPT
ssc-miR-204	ENSSSCT00000027187	ENSSSCG00000025430	DTX2
ssc-miR-204	ENSSSCT00000027305	ENSSSCG00000025588	FJX1
ssc-miR-204	ENSSSCT00000028167	ENSSSCG00000021467	EME2
ssc-miR-204	ENSSSCT00000033082	ENSSSCG00000022107	CHTOP
ssc-miR-204	ENSSSCT00000038390	ENSSSCG00000002838	ZNF423
ssc-miR-204	ENSSSCT00000039191	ENSSSCG00000033733	ENSSSCT00000039191
ssc-miR-204	ENSSSCT00000040319	ENSSSCG00000020879	FBXW7
ssc-miR-204	ENSSSCT00000044156	ENSSSCG00000039196	POLR2I
ssc-miR-204	ENSSSCT00000044321	ENSSSCG00000009327	ENSSSCT00000044321
ssc-miR-204	ENSSSCT00000045265	ENSSSCG00000013715	ENSSSCT00000045265
ssc-miR-204	ENSSSCT00000046764	ENSSSCG00000038215	ENSSSCT00000046764
ssc-miR-204	ENSSSCT00000047219	ENSSSCG00000010283	SPOCK2
ssc-miR-204	ENSSSCT00000060124	ENSSSCG00000035663	ENSSSCT00000060124
ssc-miR-204	ENSSSCT00000060971	ENSSSCG00000008265	DOK1
ssc-miR-204	ENSSSCT00000068347	ENSSSCG00000005704	EXOSC2
ssc-miR-204	ENSSSCT00000078527	ENSSSCG00000012965	DRAP1
ssc-miR-204	ENSSSCT00000082984	ENSSSCG00000009925	GIT2
ssc-miR-204	ENSSSCT00000084080	ENSSSCG00000008453	ABCG8
ssc-miR-204	ENSSSCT00000084446	ENSSSCG00000030177	EBNA1BP2
ssc-miR-204	ENSSSCT00000085438	ENSSSCG00000007189	SDCBP2
ssc-miR-204	ENSSSCT00000088565	ENSSSCG00000007189	SDCBP2
ssc-miR-221-3p	ENSSSCT00000007457	ENSSSCG00000006809	RBM15
ssc-miR-221-3p	ENSSSCT00000008590	ENSSSCG00000007840	POLR3E
ssc-miR-221-3p	ENSSSCT00000014849	ENSSSCG00000013595	CERS4
ssc-miR-221-3p	ENSSSCT00000029508	ENSSSCG00000021453	RIMS4
ssc-miR-221-3p	ENSSSCT00000031735	ENSSSCG00000014022	HNRNPH1
ssc-miR-221-3p	ENSSSCT00000037129	ENSSSCG00000016420	INSIG1
ssc-miR-221-3p	ENSSSCT00000038415	ENSSSCG00000030694	PKP1
ssc-miR-221-3p	ENSSSCT00000039998	ENSSSCG00000013595	CERS4
ssc-miR-221-3p	ENSSSCT00000044058	ENSSSCG00000000439	KIF5A
ssc-miR-221-3p	ENSSSCT00000048558	ENSSSCG00000004506	CTIF
ssc-miR-221-3p	ENSSSCT00000054098	ENSSSCG00000016961	CDK7
ssc-miR-221-3p	ENSSSCT00000056442	ENSSSCG00000014022	HNRNPH1
ssc-miR-221-3p	ENSSSCT00000057556	ENSSSCG00000014022	HNRNPH1
ssc-miR-221-3p	ENSSSCT00000065873	ENSSSCG00000012325	SMC1A
ssc-miR-221-3p	ENSSSCT00000080278	ENSSSCG00000043390	ENSSSCT00000080278
ssc-miR-339	ENSSSCT00000000019	ENSSSCG00000000018	KIAA0930
ssc-miR-339	ENSSSCT00000000048	ENSSSCG00000020945	SMDT1
ssc-miR-339	ENSSSCT00000000141	ENSSSCG00000000135	KCTD17
ssc-miR-339	ENSSSCT00000000160	ENSSSCG00000000152	RBFOX2
ssc-miR-339	ENSSSCT00000000217	ENSSSCG00000000204	PRPF40B
ssc-miR-339	ENSSSCT00000000525	ENSSSCG00000000487	SLC35E3
ssc-miR-339	ENSSSCT00000000629	ENSSSCG00000000584	SLCO1A2
ssc-miR-339	ENSSSCT00000000771	ENSSSCG00000000708	TNFRSF1A
ssc-miR-339	ENSSSCT00000001063	ENSSSCG00000000973	SELENOO
ssc-miR-339	ENSSSCT00000001714	ENSSSCG00000001539	PPARD
ssc-miR-339	ENSSSCT00000001801	ENSSSCG00000001620	MDFI
ssc-miR-339	ENSSSCT00000002003	ENSSSCG00000001788	STARD5
ssc-miR-339	ENSSSCT00000002922	ENSSSCG00000002633	GAS8
ssc-miR-339	ENSSSCT00000002927	ENSSSCG00000002637	DBNDD1
ssc-miR-339	ENSSSCT00000003092	ENSSSCG00000002792	HSF4
ssc-miR-339	ENSSSCT00000003153	ENSSSCG00000002852	PLEKHF1
ssc-miR-339	ENSSSCT00000003202	ENSSSCG00000002898	LIN37
ssc-miR-339	ENSSSCT00000003381	ENSSSCG00000003044	LYPD4
ssc-miR-339	ENSSSCT00000003504	ENSSSCG00000003155	PPP1R15A
ssc-miR-339	ENSSSCT00000003554	ENSSSCG00000003199	AP2A1
ssc-miR-339	ENSSSCT00000003569	ENSSSCG00000003214	KCNC3
ssc-miR-339	ENSSSCT00000003626	ENSSSCG00000003265	LENG1
ssc-miR-339	ENSSSCT00000003707	ENSSSCG00000003338	PUSL1
ssc-miR-339	ENSSSCT00000003717	ENSSSCG00000003348	ENSSSCT00000003717
ssc-miR-339	ENSSSCT00000003881	ENSSSCG00000003493	CAPZB
ssc-miR-339	ENSSSCT00000003899	ENSSSCG00000003509	SH2D5
ssc-miR-339	ENSSSCT00000004298	ENSSSCG00000003885	CMPK1
ssc-miR-339	ENSSSCT00000004352	ENSSSCG00000036909	ERI3
ssc-miR-339	ENSSSCT00000005066	ENSSSCG00000004587	MYO1E
ssc-miR-339	ENSSSCT00000006051	ENSSSCG00000005503	TLR4
ssc-miR-339	ENSSSCT00000006172	ENSSSCG00000005613	LRSAM1
ssc-miR-339	ENSSSCT00000006195	ENSSSCG00000022655	PTGES2
ssc-miR-339	ENSSSCT00000006406	ENSSSCG00000005828	EGFL7
ssc-miR-339	ENSSSCT00000006998	ENSSSCG00000006385	NCSTN
ssc-miR-339	ENSSSCT00000007107	ENSSSCG00000006488	GLMP
ssc-miR-339	ENSSSCT00000007405	ENSSSCG00000006760	HIPK1
ssc-miR-339	ENSSSCT00000007406	ENSSSCG00000006760	HIPK1
ssc-miR-339	ENSSSCT00000007765	ENSSSCG00000007093	ZNF133
ssc-miR-339	ENSSSCT00000007863	ENSSSCG00000007187	NSFL1C
ssc-miR-339	ENSSSCT00000008027	ENSSSCG00000007336	ENSSSCT00000008027
ssc-miR-339	ENSSSCT00000008062	ENSSSCG00000007366	MYBL2
ssc-miR-339	ENSSSCT00000008143	ENSSSCG00000007439	CDH22
ssc-miR-339	ENSSSCT00000008725	ENSSSCG00000007962	SNRNP25
ssc-miR-339	ENSSSCT00000008799	ENSSSCG00000008030	TSR3
ssc-miR-339	ENSSSCT00000009015	ENSSSCG00000008232	RNF181
ssc-miR-339	ENSSSCT00000009362	ENSSSCG00000008557	EMILIN1
ssc-miR-339	ENSSSCT00000009958	ENSSSCG00000009092	TRPC3
ssc-miR-339	ENSSSCT00000010769	ENSSSCG00000009826	TCTN1
ssc-miR-339	ENSSSCT00000010927	ENSSSCG00000009971	ZNRF3
ssc-miR-339	ENSSSCT00000010963	ENSSSCG00000010006	ENSSSCT00000010963
ssc-miR-339	ENSSSCT00000011216	ENSSSCG00000010246	DDX50
ssc-miR-339	ENSSSCT00000011282	ENSSSCG00000010309	ZSWIM8
ssc-miR-339	ENSSSCT00000011558	ENSSSCG00000010566	FBXW4
ssc-miR-339	ENSSSCT00000011604	ENSSSCG00000010608	SFR1
ssc-miR-339	ENSSSCT00000012716	ENSSSCG00000011619	EEFSEC
ssc-miR-339	ENSSSCT00000013223	ENSSSCG00000012089	ADARB1
ssc-miR-339	ENSSSCT00000013837	ENSSSCG00000012656	ELF4
ssc-miR-339	ENSSSCT00000013930	ENSSSCG00000012741	MAMLD1
ssc-miR-339	ENSSSCT00000014042	ENSSSCG00000012847	TALDO1
ssc-miR-339	ENSSSCT00000014085	ENSSSCG00000012884	PPP6R3
ssc-miR-339	ENSSSCT00000014095	ENSSSCG00000012893	UNC93B1
ssc-miR-339	ENSSSCT00000014223	ENSSSCG00000013012	SNX15
ssc-miR-339	ENSSSCT00000014691	ENSSSCG00000040624	REXO1
ssc-miR-339	ENSSSCT00000014727	ENSSSCG00000013481	FZR1
ssc-miR-339	ENSSSCT00000014849	ENSSSCG00000013595	CERS4
ssc-miR-339	ENSSSCT00000015108	ENSSSCG00000013830	ILVBL
ssc-miR-339	ENSSSCT00000015436	ENSSSCG00000014132	ENSSSCT00000015436
ssc-miR-339	ENSSSCT00000015704	ENSSSCG00000014374	DND1
ssc-miR-339	ENSSSCT00000015790	ENSSSCG00000014443	CAMK2A
ssc-miR-339	ENSSSCT00000015912	ENSSSCG00000025023	PGGHG
ssc-miR-339	ENSSSCT00000016151	ENSSSCG00000014800	RNF121
ssc-miR-339	ENSSSCT00000016451	ENSSSCG00000015085	IL10RA
ssc-miR-339	ENSSSCT00000016708	ENSSSCG00000015335	DYNC1I1
ssc-miR-339	ENSSSCT00000017132	ENSSSCG00000015732	TFCP2L1
ssc-miR-339	ENSSSCT00000018018	ENSSSCG00000016548	ENSSSCT00000018018
ssc-miR-339	ENSSSCT00000018298	ENSSSCG00000016808	C5orf22
ssc-miR-339	ENSSSCT00000018617	ENSSSCG00000017099	FASTKD3
ssc-miR-339	ENSSSCT00000018716	ENSSSCG00000017191	SRP68
ssc-miR-339	ENSSSCT00000018759	ENSSSCG00000017232	SLC9A3R1
ssc-miR-339	ENSSSCT00000018787	ENSSSCG00000017258	FAM20A
ssc-miR-339	ENSSSCT00000018882	ENSSSCG00000017346	EFTUD2
ssc-miR-339	ENSSSCT00000018903	ENSSSCG00000017364	HROB
ssc-miR-339	ENSSSCT00000018931	ENSSSCG00000017391	PLEKHH3
ssc-miR-339	ENSSSCT00000019055	ENSSSCG00000017502	PGAP3
ssc-miR-339	ENSSSCT00000019377	ENSSSCG00000017804	ABR
ssc-miR-339	ENSSSCT00000022625	ENSSSCG00000027882	C1orf115
ssc-miR-339	ENSSSCT00000022763	ENSSSCG00000024913	HYLS1
ssc-miR-339	ENSSSCT00000023379	ENSSSCG00000021042	BRWD1
ssc-miR-339	ENSSSCT00000023998	ENSSSCG00000021472	POLR2E
ssc-miR-339	ENSSSCT00000024390	ENSSSCG00000010169	SIPA1L2
ssc-miR-339	ENSSSCT00000024617	ENSSSCG00000023973	NOC2L
ssc-miR-339	ENSSSCT00000024698	ENSSSCG00000038237	UQCC1
ssc-miR-339	ENSSSCT00000024823	ENSSSCG00000011020	JCAD
ssc-miR-339	ENSSSCT00000024895	ENSSSCG00000022846	SLC4A3
ssc-miR-339	ENSSSCT00000025002	ENSSSCG00000022784	PLEKHO1
ssc-miR-339	ENSSSCT00000025342	ENSSSCG00000024088	TLN2
ssc-miR-339	ENSSSCT00000025426	ENSSSCG00000026904	ENSSSCT00000025426
ssc-miR-339	ENSSSCT00000025559	ENSSSCG00000023920	P3H1
ssc-miR-339	ENSSSCT00000026397	ENSSSCG00000020976	CSRP1
ssc-miR-339	ENSSSCT00000026769	ENSSSCG00000030518	PRSS33
ssc-miR-339	ENSSSCT00000026861	ENSSSCG00000003199	AP2A1
ssc-miR-339	ENSSSCT00000026986	ENSSSCG00000010006	ENSSSCT00000026986
ssc-miR-339	ENSSSCT00000027262	ENSSSCG00000025561	VASN
ssc-miR-339	ENSSSCT00000027390	ENSSSCG00000022129	ARSL
ssc-miR-339	ENSSSCT00000027559	ENSSSCG00000029425	MRPS18B
ssc-miR-339	ENSSSCT00000027674	ENSSSCG00000021821	MYO1C
ssc-miR-339	ENSSSCT00000027746	ENSSSCG00000014443	CAMK2A
ssc-miR-339	ENSSSCT00000027876	ENSSSCG00000020962	DYNLL2
ssc-miR-339	ENSSSCT00000028048	ENSSSCG00000024756	SPG7
ssc-miR-339	ENSSSCT00000028058	ENSSSCG00000016202	RNF25
ssc-miR-339	ENSSSCT00000028167	ENSSSCG00000021467	EME2
ssc-miR-339	ENSSSCT00000028244	ENSSSCG00000023973	NOC2L
ssc-miR-339	ENSSSCT00000028473	ENSSSCG00000012893	UNC93B1
ssc-miR-339	ENSSSCT00000028793	ENSSSCG00000022478	STK10
ssc-miR-339	ENSSSCT00000028982	ENSSSCG00000044404	MED18
ssc-miR-339	ENSSSCT00000029893	ENSSSCG00000023322	ENSSSCT00000029893
ssc-miR-339	ENSSSCT00000030046	ENSSSCG00000005613	LRSAM1
ssc-miR-339	ENSSSCT00000030104	ENSSSCG00000020785	DES
ssc-miR-339	ENSSSCT00000031592	ENSSSCG00000023636	TMEM222
ssc-miR-339	ENSSSCT00000031921	ENSSSCG00000028995	TLE2
ssc-miR-339	ENSSSCT00000032394	ENSSSCG00000023400	ZNF598
ssc-miR-339	ENSSSCT00000033478	ENSSSCG00000003178	IRF3
ssc-miR-339	ENSSSCT00000035742	ENSSSCG00000012291	GPKOW
ssc-miR-339	ENSSSCT00000036913	ENSSSCG00000017804	ABR
ssc-miR-339	ENSSSCT00000036923	ENSSSCG00000007664	AGFG2
ssc-miR-339	ENSSSCT00000037003	ENSSSCG00000002375	RPS6KL1
ssc-miR-339	ENSSSCT00000037379	ENSSSCG00000021060	RCBTB1
ssc-miR-339	ENSSSCT00000037770	ENSSSCG00000001620	MDFI
ssc-miR-339	ENSSSCT00000037825	ENSSSCG00000001384	VARS2
ssc-miR-339	ENSSSCT00000037892	ENSSSCG00000006900	DIPK1A
ssc-miR-339	ENSSSCT00000038286	ENSSSCG00000014056	RNF44
ssc-miR-339	ENSSSCT00000038384	ENSSSCG00000040833	BRF2
ssc-miR-339	ENSSSCT00000038506	ENSSSCG00000016866	GHR
ssc-miR-339	ENSSSCT00000039040	ENSSSCG00000021060	RCBTB1
ssc-miR-339	ENSSSCT00000039245	ENSSSCG00000032446	C1orf116
ssc-miR-339	ENSSSCT00000039310	ENSSSCG00000024481	PDE4DIP
ssc-miR-339	ENSSSCT00000039365	ENSSSCG00000028892	ENSSSCT00000039365
ssc-miR-339	ENSSSCT00000039998	ENSSSCG00000013595	CERS4
ssc-miR-339	ENSSSCT00000040162	ENSSSCG00000015720	BIN1
ssc-miR-339	ENSSSCT00000040200	ENSSSCG00000036537	NFIC
ssc-miR-339	ENSSSCT00000040205	ENSSSCG00000003844	TTC4
ssc-miR-339	ENSSSCT00000040318	ENSSSCG00000017502	PGAP3
ssc-miR-339	ENSSSCT00000040663	ENSSSCG00000037072	TP53TG5
ssc-miR-339	ENSSSCT00000040737	ENSSSCG00000003114	DHX34
ssc-miR-339	ENSSSCT00000040740	ENSSSCG00000017804	ABR
ssc-miR-339	ENSSSCT00000040789	ENSSSCG00000006760	HIPK1
ssc-miR-339	ENSSSCT00000040994	ENSSSCG00000030183	ENSSSCT00000040994
ssc-miR-339	ENSSSCT00000041323	ENSSSCG00000036909	ERI3
ssc-miR-339	ENSSSCT00000041381	ENSSSCG00000039838	RGS10
ssc-miR-339	ENSSSCT00000041737	ENSSSCG00000038844	SMIM5
ssc-miR-339	ENSSSCT00000041881	ENSSSCG00000037131	CLTA
ssc-miR-339	ENSSSCT00000041966	ENSSSCG00000039650	PCYT2
ssc-miR-339	ENSSSCT00000042688	ENSSSCG00000036352	RAB7B
ssc-miR-339	ENSSSCT00000042864	ENSSSCG00000031875	ZNF469
ssc-miR-339	ENSSSCT00000042874	ENSSSCG00000036482	ZSWIM7
ssc-miR-339	ENSSSCT00000043012	ENSSSCG00000011776	YEATS2
ssc-miR-339	ENSSSCT00000043267	ENSSSCG00000007366	MYBL2
ssc-miR-339	ENSSSCT00000043457	ENSSSCG00000036014	RPLP0
ssc-miR-339	ENSSSCT00000043497	ENSSSCG00000038766	MAD1L1
ssc-miR-339	ENSSSCT00000044116	ENSSSCG00000038694	CCND2
ssc-miR-339	ENSSSCT00000044407	ENSSSCG00000005828	EGFL7
ssc-miR-339	ENSSSCT00000044454	ENSSSCG00000040503	LRRC45
ssc-miR-339	ENSSSCT00000044612	ENSSSCG00000010169	SIPA1L2
ssc-miR-339	ENSSSCT00000044956	ENSSSCG00000002640	DEF8
ssc-miR-339	ENSSSCT00000045042	ENSSSCG00000036812	ENSSSCT00000045042
ssc-miR-339	ENSSSCT00000045059	ENSSSCG00000000959	LARGE1
ssc-miR-339	ENSSSCT00000045084	ENSSSCG00000031269	ENSSSCT00000045084
ssc-miR-339	ENSSSCT00000045134	ENSSSCG00000000152	RBFOX2
ssc-miR-339	ENSSSCT00000045453	ENSSSCG00000034609	RNF112
ssc-miR-339	ENSSSCT00000045970	ENSSSCG00000038237	UQCC1
ssc-miR-339	ENSSSCT00000046209	ENSSSCG00000031413	PMPCA
ssc-miR-339	ENSSSCT00000046284	ENSSSCG00000011278	TRAK1
ssc-miR-339	ENSSSCT00000046454	ENSSSCG00000001875	SNX33
ssc-miR-339	ENSSSCT00000046483	ENSSSCG00000038086	ECHS1
ssc-miR-339	ENSSSCT00000046698	ENSSSCG00000003214	KCNC3
ssc-miR-339	ENSSSCT00000046875	ENSSSCG00000008557	EMILIN1
ssc-miR-339	ENSSSCT00000047437	ENSSSCG00000037606	PSMB3
ssc-miR-339	ENSSSCT00000047593	ENSSSCG00000004961	ITGA11
ssc-miR-339	ENSSSCT00000047647	ENSSSCG00000012918	GRK2
ssc-miR-339	ENSSSCT00000047975	ENSSSCG00000025561	VASN
ssc-miR-339	ENSSSCT00000048297	ENSSSCG00000040503	LRRC45
ssc-miR-339	ENSSSCT00000048531	ENSSSCG00000037184	GPR4
ssc-miR-339	ENSSSCT00000048615	ENSSSCG00000005024	PYGL
ssc-miR-339	ENSSSCT00000048752	ENSSSCG00000030115	HS1BP3
ssc-miR-339	ENSSSCT00000048936	ENSSSCG00000038508	SPTBN2
ssc-miR-339	ENSSSCT00000049214	ENSSSCG00000032527	FOSL2
ssc-miR-339	ENSSSCT00000049367	ENSSSCG00000017804	ABR
ssc-miR-339	ENSSSCT00000049468	ENSSSCG00000038355	SP5
ssc-miR-339	ENSSSCT00000049568	ENSSSCG00000034695	SIRT7
ssc-miR-339	ENSSSCT00000049601	ENSSSCG00000031413	PMPCA
ssc-miR-339	ENSSSCT00000049763	ENSSSCG00000036014	RPLP0
ssc-miR-339	ENSSSCT00000049876	ENSSSCG00000040714	RSPH6A
ssc-miR-339	ENSSSCT00000050035	ENSSSCG00000000262	SPRYD3
ssc-miR-339	ENSSSCT00000050192	ENSSSCG00000015335	DYNC1I1
ssc-miR-339	ENSSSCT00000050558	ENSSSCG00000031666	C11orf95
ssc-miR-339	ENSSSCT00000050821	ENSSSCG00000011776	YEATS2
ssc-miR-339	ENSSSCT00000050849	ENSSSCG00000002957	GGN
ssc-miR-339	ENSSSCT00000050853	ENSSSCG00000004622	GNB5
ssc-miR-339	ENSSSCT00000050854	ENSSSCG00000033991	DPP7
ssc-miR-339	ENSSSCT00000050960	ENSSSCG00000035119	MTMR6
ssc-miR-339	ENSSSCT00000051049	ENSSSCG00000007248	ASXL1
ssc-miR-339	ENSSSCT00000051224	ENSSSCG00000001065	ATXN1
ssc-miR-339	ENSSSCT00000051273	ENSSSCG00000024184	FASTK
ssc-miR-339	ENSSSCT00000051848	ENSSSCG00000036014	RPLP0
ssc-miR-339	ENSSSCT00000051920	ENSSSCG00000024088	TLN2
ssc-miR-339	ENSSSCT00000052280	ENSSSCG00000032083	MRPL37
ssc-miR-339	ENSSSCT00000052544	ENSSSCG00000000708	TNFRSF1A
ssc-miR-339	ENSSSCT00000052668	ENSSSCG00000001930	ENSSSCT00000052668
ssc-miR-339	ENSSSCT00000052757	ENSSSCG00000010006	ENSSSCT00000052757
ssc-miR-339	ENSSSCT00000052976	ENSSSCG00000040897	ENSSSCT00000052976
ssc-miR-339	ENSSSCT00000053031	ENSSSCG00000036812	ENSSSCT00000053031
ssc-miR-339	ENSSSCT00000053190	ENSSSCG00000033025	C21orf91
ssc-miR-339	ENSSSCT00000053392	ENSSSCG00000040678	TYMS
ssc-miR-339	ENSSSCT00000053411	ENSSSCG00000033303	MBD4
ssc-miR-339	ENSSSCT00000053475	ENSSSCG00000039556	KCNQ1
ssc-miR-339	ENSSSCT00000053508	ENSSSCG00000007248	ASXL1
ssc-miR-339	ENSSSCT00000053596	ENSSSCG00000006385	NCSTN
ssc-miR-339	ENSSSCT00000053744	ENSSSCG00000036812	ENSSSCT00000053744
ssc-miR-339	ENSSSCT00000053883	ENSSSCG00000010566	FBXW4
ssc-miR-339	ENSSSCT00000054117	ENSSSCG00000001872	LINGO1
ssc-miR-339	ENSSSCT00000054235	ENSSSCG00000031786	NCDN
ssc-miR-339	ENSSSCT00000054320	ENSSSCG00000034455	RNF166
ssc-miR-339	ENSSSCT00000054367	ENSSSCG00000033299	FLNA
ssc-miR-339	ENSSSCT00000054413	ENSSSCG00000024481	PDE4DIP
ssc-miR-339	ENSSSCT00000054470	ENSSSCG00000006361	PPOX
ssc-miR-339	ENSSSCT00000054717	ENSSSCG00000000204	PRPF40B
ssc-miR-339	ENSSSCT00000054755	ENSSSCG00000007093	ZNF133
ssc-miR-339	ENSSSCT00000055102	ENSSSCG00000007187	NSFL1C
ssc-miR-339	ENSSSCT00000055472	ENSSSCG00000013020	MAP4K2
ssc-miR-339	ENSSSCT00000055707	ENSSSCG00000013889	ENSSSCT00000055707
ssc-miR-339	ENSSSCT00000055767	ENSSSCG00000036002	TGIF2
ssc-miR-339	ENSSSCT00000056077	ENSSSCG00000004070	SCAF8
ssc-miR-339	ENSSSCT00000056171	ENSSSCG00000012939	BRMS1
ssc-miR-339	ENSSSCT00000056471	ENSSSCG00000011020	JCAD
ssc-miR-339	ENSSSCT00000056696	ENSSSCG00000033299	FLNA
ssc-miR-339	ENSSSCT00000056892	ENSSSCG00000039713	ENSSSCT00000056892
ssc-miR-339	ENSSSCT00000056933	ENSSSCG00000026092	SREBF2
ssc-miR-339	ENSSSCT00000057503	ENSSSCG00000013427	DAZAP1
ssc-miR-339	ENSSSCT00000057573	ENSSSCG00000020976	CSRP1
ssc-miR-339	ENSSSCT00000058188	ENSSSCG00000017232	SLC9A3R1
ssc-miR-339	ENSSSCT00000058290	ENSSSCG00000024827	ABTB1
ssc-miR-339	ENSSSCT00000058478	ENSSSCG00000040160	MMP24
ssc-miR-339	ENSSSCT00000058701	ENSSSCG00000005284	GNA14
ssc-miR-339	ENSSSCT00000058727	ENSSSCG00000010169	SIPA1L2
ssc-miR-339	ENSSSCT00000059049	ENSSSCG00000030183	ENSSSCT00000059049
ssc-miR-339	ENSSSCT00000060256	ENSSSCG00000036102	TCF25
ssc-miR-339	ENSSSCT00000060352	ENSSSCG00000003493	CAPZB
ssc-miR-339	ENSSSCT00000060403	ENSSSCG00000033708	REPIN1
ssc-miR-339	ENSSSCT00000060705	ENSSSCG00000034715	ENSSSCT00000060705
ssc-miR-339	ENSSSCT00000060820	ENSSSCG00000012918	GRK2
ssc-miR-339	ENSSSCT00000061041	ENSSSCG00000013427	DAZAP1
ssc-miR-339	ENSSSCT00000061109	ENSSSCG00000006385	NCSTN
ssc-miR-339	ENSSSCT00000061110	ENSSSCG00000017804	ABR
ssc-miR-339	ENSSSCT00000061195	ENSSSCG00000024481	PDE4DIP
ssc-miR-339	ENSSSCT00000061666	ENSSSCG00000038650	TLCD1
ssc-miR-339	ENSSSCT00000062145	ENSSSCG00000017727	TMEM98
ssc-miR-339	ENSSSCT00000062271	ENSSSCG00000032808	ENSSSCT00000062271
ssc-miR-339	ENSSSCT00000062469	ENSSSCG00000013427	DAZAP1
ssc-miR-339	ENSSSCT00000062491	ENSSSCG00000012975	SNX32
ssc-miR-339	ENSSSCT00000062605	ENSSSCG00000039034	DNALI1
ssc-miR-339	ENSSSCT00000062787	ENSSSCG00000040624	REXO1
ssc-miR-339	ENSSSCT00000062899	ENSSSCG00000015335	DYNC1I1
ssc-miR-339	ENSSSCT00000062919	ENSSSCG00000011047	FAM171A1
ssc-miR-339	ENSSSCT00000063043	ENSSSCG00000036909	ERI3
ssc-miR-339	ENSSSCT00000063146	ENSSSCG00000020785	DES
ssc-miR-339	ENSSSCT00000063226	ENSSSCG00000028536	LHFPL2
ssc-miR-339	ENSSSCT00000063292	ENSSSCG00000035770	ZNF444
ssc-miR-339	ENSSSCT00000063483	ENSSSCG00000013857	EPS15L1
ssc-miR-339	ENSSSCT00000063490	ENSSSCG00000012918	GRK2
ssc-miR-339	ENSSSCT00000063871	ENSSSCG00000036812	ENSSSCT00000063871
ssc-miR-339	ENSSSCT00000063883	ENSSSCG00000036812	ENSSSCT00000063883
ssc-miR-339	ENSSSCT00000063884	ENSSSCG00000014043	ENSSSCT00000063884
ssc-miR-339	ENSSSCT00000063902	ENSSSCG00000004587	MYO1E
ssc-miR-339	ENSSSCT00000064383	ENSSSCG00000033830	CCDC8
ssc-miR-339	ENSSSCT00000064724	ENSSSCG00000022760	HNRNPK
ssc-miR-339	ENSSSCT00000065111	ENSSSCG00000025448	SERTAD3
ssc-miR-339	ENSSSCT00000065320	ENSSSCG00000016866	GHR
ssc-miR-339	ENSSSCT00000065353	ENSSSCG00000000204	PRPF40B
ssc-miR-339	ENSSSCT00000065394	ENSSSCG00000040533	ENSSSCT00000065394
ssc-miR-339	ENSSSCT00000065739	ENSSSCG00000022478	STK10
ssc-miR-339	ENSSSCT00000065827	ENSSSCG00000017804	ABR
ssc-miR-339	ENSSSCT00000065981	ENSSSCG00000033358	VPS37D
ssc-miR-339	ENSSSCT00000066430	ENSSSCG00000013481	FZR1
ssc-miR-339	ENSSSCT00000066487	ENSSSCG00000012893	UNC93B1
ssc-miR-339	ENSSSCT00000066830	ENSSSCG00000002633	GAS8
ssc-miR-339	ENSSSCT00000066999	ENSSSCG00000002852	PLEKHF1
ssc-miR-339	ENSSSCT00000067086	ENSSSCG00000046466	NAGLU
ssc-miR-339	ENSSSCT00000067109	ENSSSCG00000014871	TSKU
ssc-miR-339	ENSSSCT00000067119	ENSSSCG00000008557	EMILIN1
ssc-miR-339	ENSSSCT00000068107	ENSSSCG00000036812	ENSSSCT00000068107
ssc-miR-339	ENSSSCT00000069308	ENSSSCG00000010006	ENSSSCT00000069308
ssc-miR-339	ENSSSCT00000069829	ENSSSCG00000009826	TCTN1
ssc-miR-339	ENSSSCT00000069937	ENSSSCG00000008557	EMILIN1
ssc-miR-339	ENSSSCT00000070489	ENSSSCG00000041731	ENSSSCT00000070489
ssc-miR-339	ENSSSCT00000070721	ENSSSCG00000031413	PMPCA
ssc-miR-339	ENSSSCT00000070823	ENSSSCG00000006488	GLMP
ssc-miR-339	ENSSSCT00000070939	ENSSSCG00000000293	ENSSSCT00000070939
ssc-miR-339	ENSSSCT00000071179	ENSSSCG00000013105	ENSSSCT00000071179
ssc-miR-339	ENSSSCT00000071685	ENSSSCG00000020976	CSRP1
ssc-miR-339	ENSSSCT00000072173	ENSSSCG00000012918	GRK2
ssc-miR-339	ENSSSCT00000072460	ENSSSCG00000021042	BRWD1
ssc-miR-339	ENSSSCT00000072807	ENSSSCG00000009971	ZNRF3
ssc-miR-339	ENSSSCT00000073972	ENSSSCG00000041731	ENSSSCT00000073972
ssc-miR-339	ENSSSCT00000074375	ENSSSCG00000033095	KIN
ssc-miR-339	ENSSSCT00000075109	ENSSSCG00000024756	SPG7
ssc-miR-339	ENSSSCT00000075207	ENSSSCG00000000204	PRPF40B
ssc-miR-339	ENSSSCT00000075775	ENSSSCG00000024756	SPG7
ssc-miR-339	ENSSSCT00000075789	ENSSSCG00000050958	ENSSSCT00000075789
ssc-miR-339	ENSSSCT00000077001	ENSSSCG00000015288	RBBP5
ssc-miR-339	ENSSSCT00000077428	ENSSSCG00000032642	DDX41
ssc-miR-339	ENSSSCT00000077502	ENSSSCG00000017502	PGAP3
ssc-miR-339	ENSSSCT00000078356	ENSSSCG00000037606	PSMB3
ssc-miR-339	ENSSSCT00000079154	ENSSSCG00000017191	SRP68
ssc-miR-339	ENSSSCT00000079263	ENSSSCG00000008232	RNF181
ssc-miR-339	ENSSSCT00000079342	ENSSSCG00000008980	SCARB2
ssc-miR-339	ENSSSCT00000080678	ENSSSCG00000034455	RNF166
ssc-miR-339	ENSSSCT00000081119	ENSSSCG00000049428	ENSSSCT00000081119
ssc-miR-339	ENSSSCT00000081536	ENSSSCG00000006462	LRRC71
ssc-miR-339	ENSSSCT00000082099	ENSSSCG00000036168	PDSS2
ssc-miR-339	ENSSSCT00000082599	ENSSSCG00000007366	MYBL2
ssc-miR-339	ENSSSCT00000082649	ENSSSCG00000013830	ILVBL
ssc-miR-339	ENSSSCT00000082744	ENSSSCG00000030183	ENSSSCT00000082744
ssc-miR-339	ENSSSCT00000082867	ENSSSCG00000012918	GRK2
ssc-miR-339	ENSSSCT00000082901	ENSSSCG00000014450	TCOF1
ssc-miR-339	ENSSSCT00000083022	ENSSSCG00000016186	ENSSSCT00000083022
ssc-miR-339	ENSSSCT00000083743	ENSSSCG00000014450	TCOF1
ssc-miR-339	ENSSSCT00000085247	ENSSSCG00000033025	C21orf91
ssc-miR-339	ENSSSCT00000085565	ENSSSCG00000022129	ARSL
ssc-miR-339	ENSSSCT00000085673	ENSSSCG00000016186	ENSSSCT00000085673
ssc-miR-339	ENSSSCT00000085986	ENSSSCG00000012792	RENBP
ssc-miR-339	ENSSSCT00000086347	ENSSSCG00000028031	HDAC11
ssc-miR-339	ENSSSCT00000086460	ENSSSCG00000031666	C11orf95
ssc-miR-339	ENSSSCT00000086480	ENSSSCG00000016585	IMPDH1
ssc-miR-339	ENSSSCT00000086868	ENSSSCG00000043876	ENSSSCT00000086868
ssc-miR-339	ENSSSCT00000087400	ENSSSCG00000040678	TYMS
ssc-miR-339	ENSSSCT00000088211	ENSSSCG00000004587	MYO1E
ssc-miR-339	ENSSSCT00000088231	ENSSSCG00000002852	PLEKHF1
ssc-miR-339	ENSSSCT00000088346	ENSSSCG00000016734	CCM2
ssc-miR-339	ENSSSCT00000088357	ENSSSCG00000010817	LYPLAL1
ssc-miR-339	ENSSSCT00000088370	ENSSSCG00000003214	KCNC3
ssc-miR-339	ENSSSCT00000088398	ENSSSCG00000011474	PXK
ssc-miR-339	ENSSSCT00000088499	ENSSSCG00000000293	ENSSSCT00000088499
ssc-miR-339	ENSSSCT00000088741	ENSSSCG00000021821	MYO1C
ssc-miR-339	ENSSSCT00000088839	ENSSSCG00000020962	DYNLL2
ssc-miR-339	ENSSSCT00000089320	ENSSSCG00000012916	ENSSSCT00000089320
ssc-miR-339	ENSSSCT00000089974	ENSSSCG00000015714	CCDC93
ssc-miR-339	ENSSSCT00000090528	ENSSSCG00000000379	ENSSSCT00000090528
ssc-miR-339	ENSSSCT00000090750	ENSSSCG00000000293	ENSSSCT00000090750
ssc-miR-339	ENSSSCT00000091316	ENSSSCG00000017232	SLC9A3R1
ssc-miR-339	ENSSSCT00000091534	ENSSSCG00000021821	MYO1C
ssc-miR-339-3p	ENSSSCT00000000003	ENSSSCG00000000002	ENSSSCT00000000003
ssc-miR-339-3p	ENSSSCT00000000008	ENSSSCG00000000007	TRMU
ssc-miR-339-3p	ENSSSCT00000000040	ENSSSCG00000000038	CYB5R3
ssc-miR-339-3p	ENSSSCT00000000067	ENSSSCG00000000061	PMM1
ssc-miR-339-3p	ENSSSCT00000000082	ENSSSCG00000000076	SGSM3
ssc-miR-339-3p	ENSSSCT00000000088	ENSSSCG00000000082	CACNA1I
ssc-miR-339-3p	ENSSSCT00000000101	ENSSSCG00000000095	GTPBP1
ssc-miR-339-3p	ENSSSCT00000000112	ENSSSCG00000000106	KCNJ4
ssc-miR-339-3p	ENSSSCT00000000180	ENSSSCG00000000171	CKAP4
ssc-miR-339-3p	ENSSSCT00000000717	ENSSSCG00000000661	PHC1
ssc-miR-339-3p	ENSSSCT00000000718	ENSSSCG00000040743	M6PR
ssc-miR-339-3p	ENSSSCT00000000742	ENSSSCG00000000681	P3H3
ssc-miR-339-3p	ENSSSCT00000000834	ENSSSCG00000000770	MICAL3
ssc-miR-339-3p	ENSSSCT00000000995	ENSSSCG00000000910	CRADD
ssc-miR-339-3p	ENSSSCT00000001063	ENSSSCG00000000973	SELENOO
ssc-miR-339-3p	ENSSSCT00000001064	ENSSSCG00000000974	TRABD
ssc-miR-339-3p	ENSSSCT00000001075	ENSSSCG00000000985	EXOC2
ssc-miR-339-3p	ENSSSCT00000001087	ENSSSCG00000000997	PPP1R3G
ssc-miR-339-3p	ENSSSCT00000001098	ENSSSCG00000001379	TUBB
ssc-miR-339-3p	ENSSSCT00000001102	ENSSSCG00000001010	WRNIP1
ssc-miR-339-3p	ENSSSCT00000001114	ENSSSCG00000001021	ENSSSCT00000001114
ssc-miR-339-3p	ENSSSCT00000001118	ENSSSCG00000001025	DSP
ssc-miR-339-3p	ENSSSCT00000001233	ENSSSCG00000001137	H1-3
ssc-miR-339-3p	ENSSSCT00000001460	ENSSSCG00000001372	GNL1
ssc-miR-339-3p	ENSSSCT00000001555	ENSSSCG00000001418	NEU1
ssc-miR-339-3p	ENSSSCT00000001566	ENSSSCG00000001424	SKIV2L
ssc-miR-339-3p	ENSSSCT00000001665	ENSSSCG00000001493	PRIM2
ssc-miR-339-3p	ENSSSCT00000001686	ENSSSCG00000001513	SYNGAP1
ssc-miR-339-3p	ENSSSCT00000001707	ENSSSCG00000001532	UHRF1BP1
ssc-miR-339-3p	ENSSSCT00000001745	ENSSSCG00000001566	RAB44
ssc-miR-339-3p	ENSSSCT00000001800	ENSSSCG00000001619	FOXP4
ssc-miR-339-3p	ENSSSCT00000001850	ENSSSCG00000001659	KLC4
ssc-miR-339-3p	ENSSSCT00000001889	ENSSSCG00000001692	MRPS18A
ssc-miR-339-3p	ENSSSCT00000001970	ENSSSCG00000001762	CIB2
ssc-miR-339-3p	ENSSSCT00000002002	ENSSSCG00000001787	IL16
ssc-miR-339-3p	ENSSSCT00000002040	ENSSSCG00000001821	UNC45A
ssc-miR-339-3p	ENSSSCT00000002052	ENSSSCG00000001832	ACAN
ssc-miR-339-3p	ENSSSCT00000002062	ENSSSCG00000001840	KIF7
ssc-miR-339-3p	ENSSSCT00000002065	ENSSSCG00000001840	KIF7
ssc-miR-339-3p	ENSSSCT00000002263	ENSSSCG00000002023	PABPN1
ssc-miR-339-3p	ENSSSCT00000002278	ENSSSCG00000002036	ENSSSCT00000002278
ssc-miR-339-3p	ENSSSCT00000002490	ENSSSCG00000002235	LPCAT4
ssc-miR-339-3p	ENSSSCT00000002525	ENSSSCG00000002267	RGMA
ssc-miR-339-3p	ENSSSCT00000002653	ENSSSCG00000002386	ENSSSCT00000002653
ssc-miR-339-3p	ENSSSCT00000002675	ENSSSCG00000002406	AHSA1
ssc-miR-339-3p	ENSSSCT00000002726	ENSSSCG00000002456	CHGA
ssc-miR-339-3p	ENSSSCT00000002809	ENSSSCG00000002530	CINP
ssc-miR-339-3p	ENSSSCT00000002825	ENSSSCG00000002544	PPP1R13B
ssc-miR-339-3p	ENSSSCT00000002917	ENSSSCG00000002629	FBXO9
ssc-miR-339-3p	ENSSSCT00000002938	ENSSSCG00000002648	CBFA2T3
ssc-miR-339-3p	ENSSSCT00000002957	ENSSSCG00000002666	KIAA0513
ssc-miR-339-3p	ENSSSCT00000002967	ENSSSCG00000002675	DNAAF1
ssc-miR-339-3p	ENSSSCT00000003013	ENSSSCG00000002719	EXOSC6
ssc-miR-339-3p	ENSSSCT00000003045	ENSSSCG00000002748	DHX38
ssc-miR-339-3p	ENSSSCT00000003049	ENSSSCG00000002752	ZFHX3
ssc-miR-339-3p	ENSSSCT00000003056	ENSSSCG00000002759	ENSSSCT00000003056
ssc-miR-339-3p	ENSSSCT00000003080	ENSSSCG00000002782	PLEKHG4
ssc-miR-339-3p	ENSSSCT00000003081	ENSSSCG00000002783	SLC9A5
ssc-miR-339-3p	ENSSSCT00000003106	ENSSSCG00000002806	MMP15
ssc-miR-339-3p	ENSSSCT00000003232	ENSSSCG00000002926	TBCB
ssc-miR-339-3p	ENSSSCT00000003289	ENSSSCG00000002965	ENSSSCT00000003289
ssc-miR-339-3p	ENSSSCT00000003325	ENSSSCG00000002993	CYP2A19
ssc-miR-339-3p	ENSSSCT00000003381	ENSSSCG00000003044	LYPD4
ssc-miR-339-3p	ENSSSCT00000003383	ENSSSCG00000003046	ENSSSCT00000003383
ssc-miR-339-3p	ENSSSCT00000003429	ENSSSCG00000003090	ENSSSCT00000003429
ssc-miR-339-3p	ENSSSCT00000003486	ENSSSCG00000003143	MAMSTR
ssc-miR-339-3p	ENSSSCT00000003519	ENSSSCG00000003169	PIH1D1
ssc-miR-339-3p	ENSSSCT00000003528	ENSSSCG00000003177	BCL2L12
ssc-miR-339-3p	ENSSSCT00000003540	ENSSSCG00000003187	ENSSSCT00000003540
ssc-miR-339-3p	ENSSSCT00000003542	ENSSSCG00000003187	ENSSSCT00000003542
ssc-miR-339-3p	ENSSSCT00000003552	ENSSSCG00000003197	MED25
ssc-miR-339-3p	ENSSSCT00000003569	ENSSSCG00000003214	KCNC3
ssc-miR-339-3p	ENSSSCT00000003572	ENSSSCG00000003216	POLD1
ssc-miR-339-3p	ENSSSCT00000003652	ENSSSCG00000003288	HSPBP1
ssc-miR-339-3p	ENSSSCT00000003681	ENSSSCG00000003317	ZNF787
ssc-miR-339-3p	ENSSSCT00000003692	ENSSSCG00000003326	PEG3
ssc-miR-339-3p	ENSSSCT00000003719	ENSSSCG00000003350	MIB2
ssc-miR-339-3p	ENSSSCT00000003729	ENSSSCG00000003360	WRAP73
ssc-miR-339-3p	ENSSSCT00000003736	ENSSSCG00000003366	CHD5
ssc-miR-339-3p	ENSSSCT00000003738	ENSSSCG00000003368	RNF207
ssc-miR-339-3p	ENSSSCT00000003754	ENSSSCG00000003383	ZBTB48
ssc-miR-339-3p	ENSSSCT00000003777	ENSSSCG00000003404	DFFA
ssc-miR-339-3p	ENSSSCT00000003854	ENSSSCG00000003468	PLEKHM2
ssc-miR-339-3p	ENSSSCT00000003856	ENSSSCG00000003470	FAM131C
ssc-miR-339-3p	ENSSSCT00000003864	ENSSSCG00000003478	CROCC
ssc-miR-339-3p	ENSSSCT00000003865	ENSSSCG00000003479	MFAP2
ssc-miR-339-3p	ENSSSCT00000003956	ENSSSCG00000003561	ZDHHC18
ssc-miR-339-3p	ENSSSCT00000003985	ENSSSCG00000003590	PTPRU
ssc-miR-339-3p	ENSSSCT00000004030	ENSSSCG00000003634	ADPRS
ssc-miR-339-3p	ENSSSCT00000004032	ENSSSCG00000029954	THRAP3
ssc-miR-339-3p	ENSSSCT00000004051	ENSSSCG00000003655	ENSSSCT00000004051
ssc-miR-339-3p	ENSSSCT00000004107	ENSSSCG00000003708	ANKRD29
ssc-miR-339-3p	ENSSSCT00000004204	ENSSSCG00000003799	IL12RB2
ssc-miR-339-3p	ENSSSCT00000004255	ENSSSCG00000003843	PARS2
ssc-miR-339-3p	ENSSSCT00000004316	ENSSSCG00000003901	FAAH
ssc-miR-339-3p	ENSSSCT00000004328	ENSSSCG00000003913	MAST2
ssc-miR-339-3p	ENSSSCT00000004346	ENSSSCG00000003930	RPS8
ssc-miR-339-3p	ENSSSCT00000004406	ENSSSCG00000003984	ENSSSCT00000004406
ssc-miR-339-3p	ENSSSCT00000004445	ENSSSCG00000004020	SFT2D1
ssc-miR-339-3p	ENSSSCT00000004875	ENSSSCG00000004412	MICAL1
ssc-miR-339-3p	ENSSSCT00000004938	ENSSSCG00000004470	ENSSSCT00000004938
ssc-miR-339-3p	ENSSSCT00000004956	ENSSSCG00000004485	CD109
ssc-miR-339-3p	ENSSSCT00000004964	ENSSSCG00000004493	SIGLEC15
ssc-miR-339-3p	ENSSSCT00000004990	ENSSSCG00000004518	SKA1
ssc-miR-339-3p	ENSSSCT00000005049	ENSSSCG00000004570	TPM1
ssc-miR-339-3p	ENSSSCT00000005051	ENSSSCG00000004572	ENSSSCT00000005051
ssc-miR-339-3p	ENSSSCT00000005141	ENSSSCG00000004656	ENSSSCT00000005141
ssc-miR-339-3p	ENSSSCT00000005143	ENSSSCG00000004658	FBN1
ssc-miR-339-3p	ENSSSCT00000005232	ENSSSCG00000004736	SPTBN5
ssc-miR-339-3p	ENSSSCT00000005256	ENSSSCG00000004757	VPS18
ssc-miR-339-3p	ENSSSCT00000005260	ENSSSCG00000004761	ZFYVE19
ssc-miR-339-3p	ENSSSCT00000005261	ENSSSCG00000004762	DNAJC17
ssc-miR-339-3p	ENSSSCT00000005271	ENSSSCG00000004772	BAHD1
ssc-miR-339-3p	ENSSSCT00000005361	ENSSSCG00000004856	NFATC1
ssc-miR-339-3p	ENSSSCT00000005362	ENSSSCG00000004856	NFATC1
ssc-miR-339-3p	ENSSSCT00000005408	ENSSSCG00000004902	RNF152
ssc-miR-339-3p	ENSSSCT00000005463	ENSSSCG00000004951	AAGAB
ssc-miR-339-3p	ENSSSCT00000005653	ENSSSCG00000005128	TUSC1
ssc-miR-339-3p	ENSSSCT00000005783	ENSSSCG00000005249	FAM189A2
ssc-miR-339-3p	ENSSSCT00000005895	ENSSSCG00000005355	EXOSC3
ssc-miR-339-3p	ENSSSCT00000005932	ENSSSCG00000005389	TEX10
ssc-miR-339-3p	ENSSSCT00000005988	ENSSSCG00000005444	TMEM245
ssc-miR-339-3p	ENSSSCT00000006017	ENSSSCG00000005471	SNX30
ssc-miR-339-3p	ENSSSCT00000006023	ENSSSCG00000005477	FKBP15
ssc-miR-339-3p	ENSSSCT00000006075	ENSSSCG00000005524	DAB2IP
ssc-miR-339-3p	ENSSSCT00000006172	ENSSSCG00000005613	LRSAM1
ssc-miR-339-3p	ENSSSCT00000006210	ENSSSCG00000005648	SLC27A4
ssc-miR-339-3p	ENSSSCT00000006212	ENSSSCG00000005650	CERCAM
ssc-miR-339-3p	ENSSSCT00000006235	ENSSSCG00000005672	PTPA
ssc-miR-339-3p	ENSSSCT00000006272	ENSSSCG00000005703	PRDM12
ssc-miR-339-3p	ENSSSCT00000006321	ENSSSCG00000005749	BRD3
ssc-miR-339-3p	ENSSSCT00000006363	ENSSSCG00000005787	CTDP1
ssc-miR-339-3p	ENSSSCT00000006424	ENSSSCG00000005845	TOR4A
ssc-miR-339-3p	ENSSSCT00000006473	ENSSSCG00000005894	ARHGAP39
ssc-miR-339-3p	ENSSSCT00000006489	ENSSSCG00000005909	FBXL6
ssc-miR-339-3p	ENSSSCT00000006497	ENSSSCG00000005917	HSF1
ssc-miR-339-3p	ENSSSCT00000006501	ENSSSCG00000005924	MROH1
ssc-miR-339-3p	ENSSSCT00000006514	ENSSSCG00000005934	TRAPPC9
ssc-miR-339-3p	ENSSSCT00000006548	ENSSSCG00000005965	MYC
ssc-miR-339-3p	ENSSSCT00000006672	ENSSSCG00000006081	ENSSSCT00000006672
ssc-miR-339-3p	ENSSSCT00000006773	ENSSSCG00000006179	STAU2
ssc-miR-339-3p	ENSSSCT00000006789	ENSSSCG00000006194	NCOA2
ssc-miR-339-3p	ENSSSCT00000006838	ENSSSCG00000006240	FAM110B
ssc-miR-339-3p	ENSSSCT00000006907	ENSSSCG00000006302	GPR161
ssc-miR-339-3p	ENSSSCT00000007003	ENSSSCG00000006390	CASQ1
ssc-miR-339-3p	ENSSSCT00000007084	ENSSSCG00000006467	PRCC
ssc-miR-339-3p	ENSSSCT00000007113	ENSSSCG00000006494	SLC25A44
ssc-miR-339-3p	ENSSSCT00000007114	ENSSSCG00000006495	SEMA4A
ssc-miR-339-3p	ENSSSCT00000007144	ENSSSCG00000006523	MTX1
ssc-miR-339-3p	ENSSSCT00000007162	ENSSSCG00000006540	PBXIP1
ssc-miR-339-3p	ENSSSCT00000007195	ENSSSCG00000006567	CRTC2
ssc-miR-339-3p	ENSSSCT00000007304	ENSSSCG00000006666	SV2A
ssc-miR-339-3p	ENSSSCT00000007327	ENSSSCG00000006688	ANKRD35
ssc-miR-339-3p	ENSSSCT00000007358	ENSSSCG00000006717	PHGDH
ssc-miR-339-3p	ENSSSCT00000007391	ENSSSCG00000006746	VANGL1
ssc-miR-339-3p	ENSSSCT00000007609	ENSSSCG00000026772	C1orf52
ssc-miR-339-3p	ENSSSCT00000007610	ENSSSCG00000025691	BCL10
ssc-miR-339-3p	ENSSSCT00000007673	ENSSSCG00000007005	ENSSSCT00000007673
ssc-miR-339-3p	ENSSSCT00000007688	ENSSSCG00000007019	GPAT4
ssc-miR-339-3p	ENSSSCT00000007838	ENSSSCG00000007165	MRPS26
ssc-miR-339-3p	ENSSSCT00000007879	ENSSSCG00000007200	FAM110A
ssc-miR-339-3p	ENSSSCT00000007909	ENSSSCG00000035357	BCL2L1
ssc-miR-339-3p	ENSSSCT00000007936	ENSSSCG00000007253	MAPRE1
ssc-miR-339-3p	ENSSSCT00000007967	ENSSSCG00000007282	PIGU
ssc-miR-339-3p	ENSSSCT00000008027	ENSSSCG00000007336	ENSSSCT00000008027
ssc-miR-339-3p	ENSSSCT00000008061	ENSSSCG00000007362	SRSF6
ssc-miR-339-3p	ENSSSCT00000008071	ENSSSCG00000007373	GDAP1L1
ssc-miR-339-3p	ENSSSCT00000008239	ENSSSCG00000033041	ENSSSCT00000008239
ssc-miR-339-3p	ENSSSCT00000008289	ENSSSCG00000007557	MICALL2
ssc-miR-339-3p	ENSSSCT00000008291	ENSSSCG00000007559	MAFK
ssc-miR-339-3p	ENSSSCT00000008295	ENSSSCG00000007563	BRAT1
ssc-miR-339-3p	ENSSSCT00000008352	ENSSSCG00000007623	BUD31
ssc-miR-339-3p	ENSSSCT00000008361	ENSSSCG00000034019	ENSSSCT00000008361
ssc-miR-339-3p	ENSSSCT00000008434	ENSSSCG00000039962	HSPB1
ssc-miR-339-3p	ENSSSCT00000008435	ENSSSCG00000039962	HSPB1
ssc-miR-339-3p	ENSSSCT00000008451	ENSSSCG00000007708	BCL7B
ssc-miR-339-3p	ENSSSCT00000008456	ENSSSCG00000007713	BUD23
ssc-miR-339-3p	ENSSSCT00000008462	ENSSSCG00000007719	ENSSSCT00000008462
ssc-miR-339-3p	ENSSSCT00000008472	ENSSSCG00000007727	AUTS2
ssc-miR-339-3p	ENSSSCT00000008482	ENSSSCG00000007737	TPST1
ssc-miR-339-3p	ENSSSCT00000008515	ENSSSCG00000007768	STX4
ssc-miR-339-3p	ENSSSCT00000008523	ENSSSCG00000007776	BCL7C
ssc-miR-339-3p	ENSSSCT00000008552	ENSSSCG00000007804	SH2B1
ssc-miR-339-3p	ENSSSCT00000008651	ENSSSCG00000007895	ZC3H7A
ssc-miR-339-3p	ENSSSCT00000008753	ENSSSCG00000007988	JMJD8
ssc-miR-339-3p	ENSSSCT00000008762	ENSSSCG00000007995	MCRIP2
ssc-miR-339-3p	ENSSSCT00000008766	ENSSSCG00000007998	RHBDL1
ssc-miR-339-3p	ENSSSCT00000008782	ENSSSCG00000008014	NUBP2
ssc-miR-339-3p	ENSSSCT00000008787	ENSSSCG00000008019	JPT2
ssc-miR-339-3p	ENSSSCT00000008789	ENSSSCG00000008020	IFT140
ssc-miR-339-3p	ENSSSCT00000008791	ENSSSCG00000008022	TELO2
ssc-miR-339-3p	ENSSSCT00000008827	ENSSSCG00000008055	TEDC2
ssc-miR-339-3p	ENSSSCT00000008841	ENSSSCG00000008068	IARS1
ssc-miR-339-3p	ENSSSCT00000008872	ENSSSCG00000008099	ZC3H8
ssc-miR-339-3p	ENSSSCT00000009023	ENSSSCG00000008240	ENSSSCT00000009023
ssc-miR-339-3p	ENSSSCT00000009061	ENSSSCG00000008274	ENSSSCT00000009061
ssc-miR-339-3p	ENSSSCT00000009076	ENSSSCG00000008287	ENSSSCT00000009076
ssc-miR-339-3p	ENSSSCT00000009108	ENSSSCG00000008317	ENSSSCT00000009108
ssc-miR-339-3p	ENSSSCT00000009142	ENSSSCG00000008348	PLEK
ssc-miR-339-3p	ENSSSCT00000009270	ENSSSCG00000008468	PKDCC
ssc-miR-339-3p	ENSSSCT00000009361	ENSSSCG00000008556	KHK
ssc-miR-339-3p	ENSSSCT00000009362	ENSSSCG00000008557	EMILIN1
ssc-miR-339-3p	ENSSSCT00000009432	ENSSSCG00000008621	NBAS
ssc-miR-339-3p	ENSSSCT00000009505	ENSSSCG00000008689	ZFYVE28
ssc-miR-339-3p	ENSSSCT00000009512	ENSSSCG00000008694	GRK4
ssc-miR-339-3p	ENSSSCT00000009548	ENSSSCG00000008728	ZBTB49
ssc-miR-339-3p	ENSSSCT00000009549	ENSSSCG00000008729	LYAR
ssc-miR-339-3p	ENSSSCT00000009649	ENSSSCG00000008819	TXK
ssc-miR-339-3p	ENSSSCT00000009829	ENSSSCG00000008974	SDAD1
ssc-miR-339-3p	ENSSSCT00000009841	ENSSSCG00000008984	ENSSSCT00000009841
ssc-miR-339-3p	ENSSSCT00000009950	ENSSSCG00000009084	SPATA5
ssc-miR-339-3p	ENSSSCT00000010015	ENSSSCG00000009146	RPL34
ssc-miR-339-3p	ENSSSCT00000010097	ENSSSCG00000009220	DMP1
ssc-miR-339-3p	ENSSSCT00000010217	ENSSSCG00000029456	SLC7A1
ssc-miR-339-3p	ENSSSCT00000010254	ENSSSCG00000009357	SMAD9
ssc-miR-339-3p	ENSSSCT00000010407	ENSSSCG00000009491	TGDS
ssc-miR-339-3p	ENSSSCT00000010480	ENSSSCG00000009560	TFDP1
ssc-miR-339-3p	ENSSSCT00000010486	ENSSSCG00000009565	GAS6
ssc-miR-339-3p	ENSSSCT00000010535	ENSSSCG00000009612	DOK2
ssc-miR-339-3p	ENSSSCT00000010537	ENSSSCG00000009614	FAM160B2
ssc-miR-339-3p	ENSSSCT00000010599	ENSSSCG00000009666	EPHX2
ssc-miR-339-3p	ENSSSCT00000010669	ENSSSCG00000009732	CHFR
ssc-miR-339-3p	ENSSSCT00000010683	ENSSSCG00000009744	SFSWAP
ssc-miR-339-3p	ENSSSCT00000010720	ENSSSCG00000009778	RILPL2
ssc-miR-339-3p	ENSSSCT00000010725	ENSSSCG00000009783	OGFOD2
ssc-miR-339-3p	ENSSSCT00000010862	ENSSSCG00000009912	POP5
ssc-miR-339-3p	ENSSSCT00000010954	ENSSSCG00000009997	OSM
ssc-miR-339-3p	ENSSSCT00000010980	ENSSSCG00000010023	PLA2G3
ssc-miR-339-3p	ENSSSCT00000011031	ENSSSCG00000010070	SMARCB1
ssc-miR-339-3p	ENSSSCT00000011095	ENSSSCG00000010134	TANGO2
ssc-miR-339-3p	ENSSSCT00000011155	ENSSSCG00000010189	NUP133
ssc-miR-339-3p	ENSSSCT00000011286	ENSSSCG00000010311	CAMK2G
ssc-miR-339-3p	ENSSSCT00000011520	ENSSSCG00000010530	CRTAC1
ssc-miR-339-3p	ENSSSCT00000011556	ENSSSCG00000010564	POLL
ssc-miR-339-3p	ENSSSCT00000011564	ENSSSCG00000010571	ARMH3
ssc-miR-339-3p	ENSSSCT00000011579	ENSSSCG00000010586	SUFU
ssc-miR-339-3p	ENSSSCT00000011625	ENSSSCG00000010629	ADRA2A
ssc-miR-339-3p	ENSSSCT00000011768	ENSSSCG00000010756	MGMT
ssc-miR-339-3p	ENSSSCT00000011787	ENSSSCG00000010773	TUBGCP2
ssc-miR-339-3p	ENSSSCT00000011843	ENSSSCG00000010825	MARK1
ssc-miR-339-3p	ENSSSCT00000011882	ENSSSCG00000010860	ENSSSCT00000011882
ssc-miR-339-3p	ENSSSCT00000011962	ENSSSCG00000010931	ENSSSCT00000011962
ssc-miR-339-3p	ENSSSCT00000012006	ENSSSCG00000010969	GALT
ssc-miR-339-3p	ENSSSCT00000012010	ENSSSCG00000010973	RPP25L
ssc-miR-339-3p	ENSSSCT00000012122	ENSSSCG00000011076	OTUD1
ssc-miR-339-3p	ENSSSCT00000012220	ENSSSCG00000011158	PFKP
ssc-miR-339-3p	ENSSSCT00000012224	ENSSSCG00000011162	ENSSSCT00000012224
ssc-miR-339-3p	ENSSSCT00000012360	ENSSSCG00000011290	HIGD1A
ssc-miR-339-3p	ENSSSCT00000012372	ENSSSCG00000011301	ZDHHC3
ssc-miR-339-3p	ENSSSCT00000012466	ENSSSCG00000011389	AMIGO3
ssc-miR-339-3p	ENSSSCT00000012504	ENSSSCG00000011424	TEX264
ssc-miR-339-3p	ENSSSCT00000012518	ENSSSCG00000011438	BAP1
ssc-miR-339-3p	ENSSSCT00000012707	ENSSSCG00000011610	NUP210
ssc-miR-339-3p	ENSSSCT00000012720	ENSSSCG00000011623	TPRA1
ssc-miR-339-3p	ENSSSCT00000012794	ENSSSCG00000011686	SLC9A9
ssc-miR-339-3p	ENSSSCT00000012897	ENSSSCG00000026516	EPHB3
ssc-miR-339-3p	ENSSSCT00000012978	ENSSSCG00000011864	UMPS
ssc-miR-339-3p	ENSSSCT00000013222	ENSSSCG00000012088	ENSSSCT00000013222
ssc-miR-339-3p	ENSSSCT00000013239	ENSSSCG00000012104	ENSSSCT00000013239
ssc-miR-339-3p	ENSSSCT00000013266	ENSSSCG00000012127	GEMIN8
ssc-miR-339-3p	ENSSSCT00000013397	ENSSSCG00000012251	USP9X
ssc-miR-339-3p	ENSSSCT00000013423	ENSSSCG00000012275	ARAF
ssc-miR-339-3p	ENSSSCT00000013433	ENSSSCG00000012284	ZNF182
ssc-miR-339-3p	ENSSSCT00000013442	ENSSSCG00000012293	PRICKLE3
ssc-miR-339-3p	ENSSSCT00000013478	ENSSSCG00000012325	SMC1A
ssc-miR-339-3p	ENSSSCT00000013528	ENSSSCG00000012371	AR
ssc-miR-339-3p	ENSSSCT00000013835	ENSSSCG00000012654	ENSSSCT00000013835
ssc-miR-339-3p	ENSSSCT00000013987	ENSSSCG00000012795	IRAK1
ssc-miR-339-3p	ENSSSCT00000013989	ENSSSCG00000034742	MECP2
ssc-miR-339-3p	ENSSSCT00000014032	ENSSSCG00000012837	CHID1
ssc-miR-339-3p	ENSSSCT00000014036	ENSSSCG00000012841	PNPLA2
ssc-miR-339-3p	ENSSSCT00000014042	ENSSSCG00000012847	TALDO1
ssc-miR-339-3p	ENSSSCT00000014076	ENSSSCG00000012878	ENSSSCT00000014076
ssc-miR-339-3p	ENSSSCT00000014095	ENSSSCG00000012893	UNC93B1
ssc-miR-339-3p	ENSSSCT00000014099	ENSSSCG00000012896	NDUFV1
ssc-miR-339-3p	ENSSSCT00000014123	ENSSSCG00000012920	CORO1B
ssc-miR-339-3p	ENSSSCT00000014174	ENSSSCG00000012967	FOSL1
ssc-miR-339-3p	ENSSSCT00000014175	ENSSSCG00000012968	CCDC85B
ssc-miR-339-3p	ENSSSCT00000014178	ENSSSCG00000012971	EFEMP2
ssc-miR-339-3p	ENSSSCT00000014193	ENSSSCG00000012983	PCNX3
ssc-miR-339-3p	ENSSSCT00000014194	ENSSSCG00000012984	SCYL1
ssc-miR-339-3p	ENSSSCT00000014207	ENSSSCG00000012997	ENSSSCT00000014207
ssc-miR-339-3p	ENSSSCT00000014214	ENSSSCG00000013003	ZNHIT2
ssc-miR-339-3p	ENSSSCT00000014252	ENSSSCG00000013039	NUDT22
ssc-miR-339-3p	ENSSSCT00000014256	ENSSSCG00000013043	MACROD1
ssc-miR-339-3p	ENSSSCT00000014333	ENSSSCG00000013113	TMEM132A
ssc-miR-339-3p	ENSSSCT00000014483	ENSSSCG00000013259	DGKZ
ssc-miR-339-3p	ENSSSCT00000014486	ENSSSCG00000013262	AMBRA1
ssc-miR-339-3p	ENSSSCT00000014500	ENSSSCG00000013276	PRDM11
ssc-miR-339-3p	ENSSSCT00000014506	ENSSSCG00000013282	ACCS
ssc-miR-339-3p	ENSSSCT00000014522	ENSSSCG00000013296	SLC1A2
ssc-miR-339-3p	ENSSSCT00000014673	ENSSSCG00000013429	STK11
ssc-miR-339-3p	ENSSSCT00000014727	ENSSSCG00000013481	FZR1
ssc-miR-339-3p	ENSSSCT00000014768	ENSSSCG00000040968	ENSSSCT00000014768
ssc-miR-339-3p	ENSSSCT00000014769	ENSSSCG00000013522	SAFB
ssc-miR-339-3p	ENSSSCT00000014834	ENSSSCG00000013582	XAB2
ssc-miR-339-3p	ENSSSCT00000014870	ENSSSCG00000013615	ECSIT
ssc-miR-339-3p	ENSSSCT00000014926	ENSSSCG00000013662	PPAN
ssc-miR-339-3p	ENSSSCT00000014932	ENSSSCG00000027434	OLFM2
ssc-miR-339-3p	ENSSSCT00000015018	ENSSSCG00000013744	TRMT1
ssc-miR-339-3p	ENSSSCT00000015026	ENSSSCG00000013752	STX10
ssc-miR-339-3p	ENSSSCT00000015030	ENSSSCG00000013756	MRI1
ssc-miR-339-3p	ENSSSCT00000015044	ENSSSCG00000013769	C19orf67
ssc-miR-339-3p	ENSSSCT00000015052	ENSSSCG00000013776	DDX39A
ssc-miR-339-3p	ENSSSCT00000015063	ENSSSCG00000013786	ZNF333
ssc-miR-339-3p	ENSSSCT00000015136	ENSSSCG00000013857	EPS15L1
ssc-miR-339-3p	ENSSSCT00000015199	ENSSSCG00000013913	KLHL26
ssc-miR-339-3p	ENSSSCT00000015281	ENSSSCG00000013990	GUK1
ssc-miR-339-3p	ENSSSCT00000015451	ENSSSCG00000014147	CCNH
ssc-miR-339-3p	ENSSSCT00000015600	ENSSSCG00000014277	IRF1
ssc-miR-339-3p	ENSSSCT00000015610	ENSSSCG00000014287	SHROOM1
ssc-miR-339-3p	ENSSSCT00000015666	ENSSSCG00000014339	CTNNA1
ssc-miR-339-3p	ENSSSCT00000015728	ENSSSCG00000014391	ARAP3
ssc-miR-339-3p	ENSSSCT00000015776	ENSSSCG00000014431	AFAP1L1
ssc-miR-339-3p	ENSSSCT00000015984	ENSSSCG00000014633	CAVIN3
ssc-miR-339-3p	ENSSSCT00000016131	ENSSSCG00000014780	TRIM21
ssc-miR-339-3p	ENSSSCT00000016177	ENSSSCG00000014825	RELT
ssc-miR-339-3p	ENSSSCT00000016316	ENSSSCG00000014955	MRE11
ssc-miR-339-3p	ENSSSCT00000016478	ENSSSCG00000015113	ABCG4
ssc-miR-339-3p	ENSSSCT00000016624	ENSSSCG00000015255	IGSF9B
ssc-miR-339-3p	ENSSSCT00000016719	ENSSSCG00000015346	ICA1
ssc-miR-339-3p	ENSSSCT00000016927	ENSSSCG00000015538	KIAA1614
ssc-miR-339-3p	ENSSSCT00000016940	ENSSSCG00000015550	RGS16
ssc-miR-339-3p	ENSSSCT00000017209	ENSSSCG00000015802	ENSSSCT00000017209
ssc-miR-339-3p	ENSSSCT00000017352	ENSSSCG00000015936	PHOSPHO2
ssc-miR-339-3p	ENSSSCT00000017559	ENSSSCG00000016127	NDUFS1
ssc-miR-339-3p	ENSSSCT00000017574	ENSSSCG00000016141	PLEKHM3
ssc-miR-339-3p	ENSSSCT00000017655	ENSSSCG00000016214	STK16
ssc-miR-339-3p	ENSSSCT00000017659	ENSSSCG00000016218	PTPRN
ssc-miR-339-3p	ENSSSCT00000017661	ENSSSCG00000016220	DNPEP
ssc-miR-339-3p	ENSSSCT00000017827	ENSSSCG00000016372	STK25
ssc-miR-339-3p	ENSSSCT00000017980	ENSSSCG00000016513	KIAA1549
ssc-miR-339-3p	ENSSSCT00000018199	ENSSSCG00000016718	NPY
ssc-miR-339-3p	ENSSSCT00000018202	ENSSSCG00000016721	DBNL
ssc-miR-339-3p	ENSSSCT00000018227	ENSSSCG00000016745	DDX56
ssc-miR-339-3p	ENSSSCT00000018238	ENSSSCG00000016756	BLVRA
ssc-miR-339-3p	ENSSSCT00000018281	ENSSSCG00000016793	ZNF622
ssc-miR-339-3p	ENSSSCT00000018511	ENSSSCG00000016999	TLX3
ssc-miR-339-3p	ENSSSCT00000018608	ENSSSCG00000017091	TNIP1
ssc-miR-339-3p	ENSSSCT00000018609	ENSSSCG00000017091	TNIP1
ssc-miR-339-3p	ENSSSCT00000018616	ENSSSCG00000017098	C5orf49
ssc-miR-339-3p	ENSSSCT00000018634	ENSSSCG00000017116	LPCAT1
ssc-miR-339-3p	ENSSSCT00000018643	ENSSSCG00000017125	FOXK2
ssc-miR-339-3p	ENSSSCT00000018659	ENSSSCG00000017140	CHMP6
ssc-miR-339-3p	ENSSSCT00000018691	ENSSSCG00000017167	CYTH1
ssc-miR-339-3p	ENSSSCT00000018692	ENSSSCG00000017168	SEPTIN9
ssc-miR-339-3p	ENSSSCT00000018703	ENSSSCG00000017178	SPHK1
ssc-miR-339-3p	ENSSSCT00000018722	ENSSSCG00000017197	FBF1
ssc-miR-339-3p	ENSSSCT00000018725	ENSSSCG00000017200	UNC13D
ssc-miR-339-3p	ENSSSCT00000018767	ENSSSCG00000017238	TTYH2
ssc-miR-339-3p	ENSSSCT00000018795	ENSSSCG00000023992	CEP112
ssc-miR-339-3p	ENSSSCT00000018828	ENSSSCG00000017296	ACE
ssc-miR-339-3p	ENSSSCT00000018829	ENSSSCG00000017296	ACE
ssc-miR-339-3p	ENSSSCT00000018872	ENSSSCG00000017336	HEXIM1
ssc-miR-339-3p	ENSSSCT00000018875	ENSSSCG00000017339	NMT1
ssc-miR-339-3p	ENSSSCT00000018878	ENSSSCG00000017342	KIF18B
ssc-miR-339-3p	ENSSSCT00000018903	ENSSSCG00000017364	HROB
ssc-miR-339-3p	ENSSSCT00000018918	ENSSSCG00000017379	ETV4
ssc-miR-339-3p	ENSSSCT00000018975	ENSSSCG00000017429	P3H4
ssc-miR-339-3p	ENSSSCT00000019093	ENSSSCG00000017539	HOXB6
ssc-miR-339-3p	ENSSSCT00000019106	ENSSSCG00000017552	NXPH3
ssc-miR-339-3p	ENSSSCT00000019148	ENSSSCG00000017589	DLX3
ssc-miR-339-3p	ENSSSCT00000019246	ENSSSCG00000017682	MYO19
ssc-miR-339-3p	ENSSSCT00000019285	ENSSSCG00000022987	TMEM132E
ssc-miR-339-3p	ENSSSCT00000019333	ENSSSCG00000017761	UNC119
ssc-miR-339-3p	ENSSSCT00000019373	ENSSSCG00000017801	ENSSSCT00000019373
ssc-miR-339-3p	ENSSSCT00000019376	ENSSSCG00000017803	TIMM22
ssc-miR-339-3p	ENSSSCT00000019382	ENSSSCG00000017809	GEMIN4
ssc-miR-339-3p	ENSSSCT00000019386	ENSSSCG00000017812	VPS53
ssc-miR-339-3p	ENSSSCT00000019442	ENSSSCG00000017866	TAX1BP3
ssc-miR-339-3p	ENSSSCT00000019459	ENSSSCG00000017882	MYBBP1A
ssc-miR-339-3p	ENSSSCT00000019486	ENSSSCG00000017906	ENSSSCT00000019486
ssc-miR-339-3p	ENSSSCT00000019507	ENSSSCG00000017924	PELP1
ssc-miR-339-3p	ENSSSCT00000019525	ENSSSCG00000017941	NEURL4
ssc-miR-339-3p	ENSSSCT00000019535	ENSSSCG00000017951	ATP1B2
ssc-miR-339-3p	ENSSSCT00000019579	ENSSSCG00000017991	PIK3R5
ssc-miR-339-3p	ENSSSCT00000019590	ENSSSCG00000039056	GAS7
ssc-miR-339-3p	ENSSSCT00000019601	ENSSSCG00000018007	MYH3
ssc-miR-339-3p	ENSSSCT00000019611	ENSSSCG00000018016	MAP2K4
ssc-miR-339-3p	ENSSSCT00000019646	ENSSSCG00000018051	COPS3
ssc-miR-339-3p	ENSSSCT00000019650	ENSSSCG00000018055	ENSSSCT00000019650
ssc-miR-339-3p	ENSSSCT00000022488	ENSSSCG00000029637	KDM2A
ssc-miR-339-3p	ENSSSCT00000022496	ENSSSCG00000023857	ENSSSCT00000022496
ssc-miR-339-3p	ENSSSCT00000022550	ENSSSCG00000029375	ZNF205
ssc-miR-339-3p	ENSSSCT00000022557	ENSSSCG00000024162	ENSSSCT00000022557
ssc-miR-339-3p	ENSSSCT00000022625	ENSSSCG00000027882	C1orf115
ssc-miR-339-3p	ENSSSCT00000022675	ENSSSCG00000025784	CDH4
ssc-miR-339-3p	ENSSSCT00000022806	ENSSSCG00000028275	INTS5
ssc-miR-339-3p	ENSSSCT00000022833	ENSSSCG00000023160	SMIM29
ssc-miR-339-3p	ENSSSCT00000022870	ENSSSCG00000029808	EIF2B3
ssc-miR-339-3p	ENSSSCT00000022987	ENSSSCG00000027374	ENSSSCT00000022987
ssc-miR-339-3p	ENSSSCT00000023197	ENSSSCG00000015211	PKNOX2
ssc-miR-339-3p	ENSSSCT00000023251	ENSSSCG00000032739	RBMX2
ssc-miR-339-3p	ENSSSCT00000023385	ENSSSCG00000036310	RFXANK
ssc-miR-339-3p	ENSSSCT00000023428	ENSSSCG00000026868	LRRC15
ssc-miR-339-3p	ENSSSCT00000023445	ENSSSCG00000022380	SH2D3A
ssc-miR-339-3p	ENSSSCT00000023480	ENSSSCG00000025041	ENSSSCT00000023480
ssc-miR-339-3p	ENSSSCT00000023508	ENSSSCG00000026293	STX5
ssc-miR-339-3p	ENSSSCT00000023583	ENSSSCG00000026516	EPHB3
ssc-miR-339-3p	ENSSSCT00000023628	ENSSSCG00000027252	HCFC1R1
ssc-miR-339-3p	ENSSSCT00000023629	ENSSSCG00000026733	HIPK2
ssc-miR-339-3p	ENSSSCT00000023706	ENSSSCG00000028840	EZH2
ssc-miR-339-3p	ENSSSCT00000023710	ENSSSCG00000022091	SLITRK4
ssc-miR-339-3p	ENSSSCT00000023766	ENSSSCG00000022289	PCDH1
ssc-miR-339-3p	ENSSSCT00000023773	ENSSSCG00000022151	B3GALT6
ssc-miR-339-3p	ENSSSCT00000023816	ENSSSCG00000003016	CCDC97
ssc-miR-339-3p	ENSSSCT00000023947	ENSSSCG00000028602	GTPBP4
ssc-miR-339-3p	ENSSSCT00000023998	ENSSSCG00000021472	POLR2E
ssc-miR-339-3p	ENSSSCT00000024076	ENSSSCG00000028850	RPL26
ssc-miR-339-3p	ENSSSCT00000024371	ENSSSCG00000003350	MIB2
ssc-miR-339-3p	ENSSSCT00000024443	ENSSSCG00000004415	ENSSSCT00000024443
ssc-miR-339-3p	ENSSSCT00000024454	ENSSSCG00000024793	PORCN
ssc-miR-339-3p	ENSSSCT00000024591	ENSSSCG00000021397	PODXL2
ssc-miR-339-3p	ENSSSCT00000024704	ENSSSCG00000027434	OLFM2
ssc-miR-339-3p	ENSSSCT00000024718	ENSSSCG00000025564	GAS2L1
ssc-miR-339-3p	ENSSSCT00000024767	ENSSSCG00000024789	SRRT
ssc-miR-339-3p	ENSSSCT00000024773	ENSSSCG00000022722	CARMIL2
ssc-miR-339-3p	ENSSSCT00000024782	ENSSSCG00000033750	ENSSSCT00000024782
ssc-miR-339-3p	ENSSSCT00000024788	ENSSSCG00000027726	DLL1
ssc-miR-339-3p	ENSSSCT00000024851	ENSSSCG00000024604	ATAT1
ssc-miR-339-3p	ENSSSCT00000024857	ENSSSCG00000029723	PHRF1
ssc-miR-339-3p	ENSSSCT00000024882	ENSSSCG00000011765	USP13
ssc-miR-339-3p	ENSSSCT00000024927	ENSSSCG00000022163	GNAL
ssc-miR-339-3p	ENSSSCT00000024967	ENSSSCG00000023607	CYP4F22
ssc-miR-339-3p	ENSSSCT00000025007	ENSSSCG00000020846	SCARA3
ssc-miR-339-3p	ENSSSCT00000025022	ENSSSCG00000027179	SIM2
ssc-miR-339-3p	ENSSSCT00000025153	ENSSSCG00000024570	KDM4B
ssc-miR-339-3p	ENSSSCT00000025222	ENSSSCG00000023139	METTL23
ssc-miR-339-3p	ENSSSCT00000025270	ENSSSCG00000007426	ACOT8
ssc-miR-339-3p	ENSSSCT00000025301	ENSSSCG00000028723	CCDC102A
ssc-miR-339-3p	ENSSSCT00000025385	ENSSSCG00000025701	NCK1
ssc-miR-339-3p	ENSSSCT00000025402	ENSSSCG00000002266	ENSSSCT00000025402
ssc-miR-339-3p	ENSSSCT00000025446	ENSSSCG00000030122	ENSSSCT00000025446
ssc-miR-339-3p	ENSSSCT00000025783	ENSSSCG00000028934	FAM3A
ssc-miR-339-3p	ENSSSCT00000025792	ENSSSCG00000030016	PDE9A
ssc-miR-339-3p	ENSSSCT00000025824	ENSSSCG00000026103	ZBTB17
ssc-miR-339-3p	ENSSSCT00000025955	ENSSSCG00000030378	LIMK1
ssc-miR-339-3p	ENSSSCT00000025981	ENSSSCG00000022060	RASSF10
ssc-miR-339-3p	ENSSSCT00000025987	ENSSSCG00000013933	PBX4
ssc-miR-339-3p	ENSSSCT00000026006	ENSSSCG00000024240	CCDC9
ssc-miR-339-3p	ENSSSCT00000026224	ENSSSCG00000021712	HERC6
ssc-miR-339-3p	ENSSSCT00000026279	ENSSSCG00000012309	SHROOM4
ssc-miR-339-3p	ENSSSCT00000026356	ENSSSCG00000023315	THOC6
ssc-miR-339-3p	ENSSSCT00000026490	ENSSSCG00000030255	EIF4G1
ssc-miR-339-3p	ENSSSCT00000026522	ENSSSCG00000024570	KDM4B
ssc-miR-339-3p	ENSSSCT00000026652	ENSSSCG00000038854	PSMF1
ssc-miR-339-3p	ENSSSCT00000026762	ENSSSCG00000030131	C15orf40
ssc-miR-339-3p	ENSSSCT00000026924	ENSSSCG00000024254	ALKBH7
ssc-miR-339-3p	ENSSSCT00000026945	ENSSSCG00000007135	NINL
ssc-miR-339-3p	ENSSSCT00000026966	ENSSSCG00000024793	PORCN
ssc-miR-339-3p	ENSSSCT00000027082	ENSSSCG00000030000	KLHL17
ssc-miR-339-3p	ENSSSCT00000027122	ENSSSCG00000007157	SLC4A11
ssc-miR-339-3p	ENSSSCT00000027158	ENSSSCG00000040968	ENSSSCT00000027158
ssc-miR-339-3p	ENSSSCT00000027205	ENSSSCG00000006567	CRTC2
ssc-miR-339-3p	ENSSSCT00000027267	ENSSSCG00000023325	ENSSSCT00000027267
ssc-miR-339-3p	ENSSSCT00000027397	ENSSSCG00000021478	CWC25
ssc-miR-339-3p	ENSSSCT00000027454	ENSSSCG00000008240	ENSSSCT00000027454
ssc-miR-339-3p	ENSSSCT00000027498	ENSSSCG00000021105	DPEP2
ssc-miR-339-3p	ENSSSCT00000027559	ENSSSCG00000029425	MRPS18B
ssc-miR-339-3p	ENSSSCT00000027561	ENSSSCG00000005787	CTDP1
ssc-miR-339-3p	ENSSSCT00000027671	ENSSSCG00000025252	PEX5
ssc-miR-339-3p	ENSSSCT00000027674	ENSSSCG00000021821	MYO1C
ssc-miR-339-3p	ENSSSCT00000027692	ENSSSCG00000020926	SDHB
ssc-miR-339-3p	ENSSSCT00000027711	ENSSSCG00000028346	SAMM50
ssc-miR-339-3p	ENSSSCT00000027748	ENSSSCG00000023619	SLC12A9
ssc-miR-339-3p	ENSSSCT00000027760	ENSSSCG00000022647	TIMM17B
ssc-miR-339-3p	ENSSSCT00000027808	ENSSSCG00000021581	CLCN2
ssc-miR-339-3p	ENSSSCT00000027990	ENSSSCG00000029985	ARL10
ssc-miR-339-3p	ENSSSCT00000028131	ENSSSCG00000002039	MMP14
ssc-miR-339-3p	ENSSSCT00000028173	ENSSSCG00000027907	ENSSSCT00000028173
ssc-miR-339-3p	ENSSSCT00000028255	ENSSSCG00000026953	TPGS2
ssc-miR-339-3p	ENSSSCT00000028340	ENSSSCG00000004419	SLC16A10
ssc-miR-339-3p	ENSSSCT00000028348	ENSSSCG00000025092	CDK4
ssc-miR-339-3p	ENSSSCT00000028458	ENSSSCG00000027487	LAT2
ssc-miR-339-3p	ENSSSCT00000028463	ENSSSCG00000028559	LZTS1
ssc-miR-339-3p	ENSSSCT00000028473	ENSSSCG00000012893	UNC93B1
ssc-miR-339-3p	ENSSSCT00000028600	ENSSSCG00000025303	FAM50A
ssc-miR-339-3p	ENSSSCT00000028633	ENSSSCG00000008007	WDR24
ssc-miR-339-3p	ENSSSCT00000028648	ENSSSCG00000024162	ENSSSCT00000028648
ssc-miR-339-3p	ENSSSCT00000028719	ENSSSCG00000020736	ADD2
ssc-miR-339-3p	ENSSSCT00000028825	ENSSSCG00000035051	ADORA2B
ssc-miR-339-3p	ENSSSCT00000028880	ENSSSCG00000027124	ENSSSCT00000028880
ssc-miR-339-3p	ENSSSCT00000028927	ENSSSCG00000021798	LZTS2
ssc-miR-339-3p	ENSSSCT00000028958	ENSSSCG00000025689	DVL2
ssc-miR-339-3p	ENSSSCT00000029036	ENSSSCG00000029509	KIF22
ssc-miR-339-3p	ENSSSCT00000029063	ENSSSCG00000029296	FOXC2
ssc-miR-339-3p	ENSSSCT00000029175	ENSSSCG00000025272	HEMK1
ssc-miR-339-3p	ENSSSCT00000029345	ENSSSCG00000023110	UBXN1
ssc-miR-339-3p	ENSSSCT00000029479	ENSSSCG00000028338	PAMR1
ssc-miR-339-3p	ENSSSCT00000029543	ENSSSCG00000000095	GTPBP1
ssc-miR-339-3p	ENSSSCT00000029639	ENSSSCG00000023714	SLC31A2
ssc-miR-339-3p	ENSSSCT00000029673	ENSSSCG00000000449	DTX3
ssc-miR-339-3p	ENSSSCT00000029745	ENSSSCG00000006510	ENSSSCT00000029745
ssc-miR-339-3p	ENSSSCT00000029880	ENSSSCG00000028085	ENSSSCT00000029880
ssc-miR-339-3p	ENSSSCT00000030046	ENSSSCG00000005613	LRSAM1
ssc-miR-339-3p	ENSSSCT00000030126	ENSSSCG00000026001	DNAJC1
ssc-miR-339-3p	ENSSSCT00000030210	ENSSSCG00000028284	KCND1
ssc-miR-339-3p	ENSSSCT00000030221	ENSSSCG00000026417	EPS8L1
ssc-miR-339-3p	ENSSSCT00000030503	ENSSSCG00000028696	FEN1
ssc-miR-339-3p	ENSSSCT00000030610	ENSSSCG00000028788	BORCS6
ssc-miR-339-3p	ENSSSCT00000030648	ENSSSCG00000025260	CARD10
ssc-miR-339-3p	ENSSSCT00000030704	ENSSSCG00000010732	FAM53B
ssc-miR-339-3p	ENSSSCT00000030728	ENSSSCG00000029362	CHMP2A
ssc-miR-339-3p	ENSSSCT00000030744	ENSSSCG00000024453	RAF1
ssc-miR-339-3p	ENSSSCT00000030841	ENSSSCG00000006827	CYB561D1
ssc-miR-339-3p	ENSSSCT00000030875	ENSSSCG00000028033	SECISBP2
ssc-miR-339-3p	ENSSSCT00000030985	ENSSSCG00000025943	C6orf136
ssc-miR-339-3p	ENSSSCT00000031066	ENSSSCG00000025245	ARMC5
ssc-miR-339-3p	ENSSSCT00000031067	ENSSSCG00000038055	CORO1A
ssc-miR-339-3p	ENSSSCT00000031254	ENSSSCG00000029637	KDM2A
ssc-miR-339-3p	ENSSSCT00000031335	ENSSSCG00000030505	PLEKHN1
ssc-miR-339-3p	ENSSSCT00000031403	ENSSSCG00000024655	PHB2
ssc-miR-339-3p	ENSSSCT00000031449	ENSSSCG00000024453	RAF1
ssc-miR-339-3p	ENSSSCT00000031497	ENSSSCG00000002003	ENSSSCT00000031497
ssc-miR-339-3p	ENSSSCT00000031675	ENSSSCG00000030015	ENSSSCT00000031675
ssc-miR-339-3p	ENSSSCT00000031706	ENSSSCG00000000661	PHC1
ssc-miR-339-3p	ENSSSCT00000031728	ENSSSCG00000029744	PLCH2
ssc-miR-339-3p	ENSSSCT00000031995	ENSSSCG00000027407	MYH14
ssc-miR-339-3p	ENSSSCT00000032030	ENSSSCG00000026939	LMAN2L
ssc-miR-339-3p	ENSSSCT00000032098	ENSSSCG00000025975	FAM83E
ssc-miR-339-3p	ENSSSCT00000032239	ENSSSCG00000017819	SMYD4
ssc-miR-339-3p	ENSSSCT00000032263	ENSSSCG00000026407	ENSSSCT00000032263
ssc-miR-339-3p	ENSSSCT00000032266	ENSSSCG00000023933	CRACR2B
ssc-miR-339-3p	ENSSSCT00000032341	ENSSSCG00000023177	RRP9
ssc-miR-339-3p	ENSSSCT00000032460	ENSSSCG00000022906	ENSSSCT00000032460
ssc-miR-339-3p	ENSSSCT00000032490	ENSSSCG00000022034	SMYD3
ssc-miR-339-3p	ENSSSCT00000033060	ENSSSCG00000007817	IL4R
ssc-miR-339-3p	ENSSSCT00000033078	ENSSSCG00000015815	FGFR1
ssc-miR-339-3p	ENSSSCT00000033173	ENSSSCG00000012816	MTCP1
ssc-miR-339-3p	ENSSSCT00000033175	ENSSSCG00000007521	NELFCD
ssc-miR-339-3p	ENSSSCT00000033233	ENSSSCG00000000361	ENSSSCT00000033233
ssc-miR-339-3p	ENSSSCT00000033369	ENSSSCG00000000765	IL17RA
ssc-miR-339-3p	ENSSSCT00000033465	ENSSSCG00000008601	SDC1
ssc-miR-339-3p	ENSSSCT00000033498	ENSSSCG00000010706	SAMD4B
ssc-miR-339-3p	ENSSSCT00000033560	ENSSSCG00000017416	DHX58
ssc-miR-339-3p	ENSSSCT00000033807	ENSSSCG00000012825	IKBKG
ssc-miR-339-3p	ENSSSCT00000033897	ENSSSCG00000030947	ZFAT
ssc-miR-339-3p	ENSSSCT00000033899	ENSSSCG00000001219	TRIM27
ssc-miR-339-3p	ENSSSCT00000033991	ENSSSCG00000012843	PIDD1
ssc-miR-339-3p	ENSSSCT00000034002	ENSSSCG00000001414	ENSSSCT00000034002
ssc-miR-339-3p	ENSSSCT00000034320	ENSSSCG00000013629	SMARCA4
[truncated: 2,810 more rows]

## Sheet: Table S4-4
Table S4-4 Integrated analysis of miRNAs and mRNAs involved in fat-related pathways
[truncated: 15 more rows]
